# Supplementary material for: Type 1 Diabetes Mellitus-Associated Genetic Variants Contribute to Overlapping Immune Regulatory Networks
Source: Front Genet. 2018 Nov 21;9:535. doi: 10.3389/fgene.2018.00535 (PMC6258722; doi:10.3389/fgene.2018.00535)
Supplement: Supplementary file 2 [file Data_Sheet_2.xlsx]

## Sheet: T1D associated SNPs from GWAS
										Single nucleotide polymorphisms associated with T1D from the manually curated Catalog of Published Genome-Wide Association Studies
DATE ADDED TO CATALOG	PUBMEDID	FIRST AUTHOR	DATE	JOURNAL	LINK	STUDY	DISEASE/TRAIT	INITIAL SAMPLE SIZE	REPLICATION SAMPLE SIZE	REGION	CHR_ID	CHR_POS	REPORTED GENE(S)	MAPPED_GENE	UPSTREAM_GENE_ID	DOWNSTREAM_GENE_ID	SNP_GENE_IDS	UPSTREAM_GENE_DISTANCE	DOWNSTREAM_GENE_DISTANCE	STRONGEST SNP-RISK ALLELE	SNPS	MERGED	SNP_ID_CURRENT	CONTEXT	INTERGENIC	RISK ALLELE FREQUENCY	P-VALUE	PVALUE_MLOG	P-VALUE (TEXT)	OR or BETA	95% CI (TEXT)	PLATFORM [SNPS PASSING QC]	CNV
2009-06-01	19430480	Barrett JC	2009-05-10	Nat Genet	www.ncbi.nlm.nih.gov/pubmed/19430480	Genome-wide association study and meta-analysis find that over 40 loci affect risk of type 1 diabetes.	Type 1 diabetes	7,514 cases, 9,045 controls	4,267 cases, 4,670 controls, 4,342 trios from 2,319 families	1p13.2	1	113834946	PTPN22	AP4B1-AS1, PTPN22			100287722, 26191			rs2476601-?	rs2476601	0	2476601	missense_variant	0	NR	9e-85	84.0458				Affymetrix, Illumina [841622] (imputed)	N
2008-06-16	17554260	Todd JA	2007-06-06	Nat Genet	www.ncbi.nlm.nih.gov/pubmed/17554260	Robust associations of four new chromosome regions from genome-wide analyses of type 1 diabetes.	Type 1 diabetes	2,000 European ancestry cases, 3,000 European ancestry controls	2,997 European ancestry trios, 4,000 European ancestry cases, 5,000 European ancestry controls	1p13.2	1	113834946	PTPN22	AP4B1-AS1, PTPN22			100287722, 26191			rs2476601-T	rs2476601	0	2476601	missense_variant	0	0.09	2e-80	79.699		1.98	[1.82-2.15]	Affymetrix [NR]	N
2008-11-26	18978792	Cooper JD	2008-11-02	Nat Genet	www.ncbi.nlm.nih.gov/pubmed/18978792	Meta-analysis of genome-wide association study data identifies additional type 1 diabetes risk loci.	Type 1 diabetes	3,561 European ancestry cases, 4,646 European ancestry controls	6,225 European ancestry cases, 6,946 European ancestry controls, 3,064 European ancestry trios from 2,828 families	1p13.2	1	113761186	PTPN22	PHTF1 - RSBN1	10745	54665		1298	646	rs6679677-A	rs6679677	0	6679677	upstream_gene_variant	1	NR	1e-40	40				Affymetrix [up to 335565]	N
2008-06-16	17554300	WTCCC	2007-06-07	Nature	www.ncbi.nlm.nih.gov/pubmed/17554300	Genome-wide association study of 14,000 cases of seven common diseases and 3,000 shared controls.	Type 1 diabetes	1,963 European ancestry cases, 2,938 European ancestry controls	(see Todd 2007)	1p13.2	1	113761186	PTPN22	PHTF1 - RSBN1	10745	54665		1298	646	rs6679677-A	rs6679677	0	6679677	upstream_gene_variant	1	0.1	5e-26	25.301		1.82	[1.59-2.09]	Affymetrix [469557]	N
2008-06-16	17554260	Todd JA	2007-06-06	Nat Genet	www.ncbi.nlm.nih.gov/pubmed/17554260	Robust associations of four new chromosome regions from genome-wide analyses of type 1 diabetes.	Type 1 diabetes	2,000 European ancestry cases, 3,000 European ancestry controls	2,997 European ancestry trios, 4,000 European ancestry cases, 5,000 European ancestry controls	1p13.2	1	113761186	PHTF1, PTPN22	PHTF1 - RSBN1	10745	54665		1298	646	rs6679677-A	rs6679677	0	6679677	upstream_gene_variant	1	0.1	8e-24	23.0969		1.89	[1.67-2.13]	Affymetrix [NR]	N
2016-02-04	25936594	Tomer Y	2015-04-27	J Autoimmun	www.ncbi.nlm.nih.gov/pubmed/25936594	Genome wide identification of new genes and pathways in patients with both autoimmune thyroiditis and type 1 diabetes.	Type 1 diabetes and autoimmune thyroid diseases	346 European ancestry cases, 727 European ancestry controls	185 European ancestry cases, 340 European ancestry controls	1p13.2	1	113834946	PHTF1, PTPN22	AP4B1-AS1, PTPN22			100287722, 26191			rs2476601-A	rs2476601	0	2476601	missense_variant	0	NR	7e-20	19.1549		2.7073		Illumina [514008]	N
2016-02-04	25936594	Tomer Y	2015-04-27	J Autoimmun	www.ncbi.nlm.nih.gov/pubmed/25936594	Genome wide identification of new genes and pathways in patients with both autoimmune thyroiditis and type 1 diabetes.	Type 1 diabetes and autoimmune thyroid diseases	346 European ancestry cases, 727 European ancestry controls	185 European ancestry cases, 340 European ancestry controls	1p13.2	1	113886839	BCL2L15	BCL2L15, AP4B1-AS1			440603, 100287722			rs2358994-A	rs2358994	0	2358994	intron_variant	0	NR	2e-11	10.699		1.8688		Illumina [514008]	N
2016-08-31	26301688	Li YR	2015-08-24	Nat Med	www.ncbi.nlm.nih.gov/pubmed/26301688	Meta-analysis of shared genetic architecture across ten pediatric autoimmune diseases.	Pediatric autoimmune diseases	97 European ancestry thyroiditis cases, 107 European ancestry ankylosing spondylitis cases, 100 European ancestry psoriasis cases, 173 European ancestry celiac disease cases, 254 European ancestry systemic lupus erythematosus cases, 308 European ancestry common variable inmunodeficiency cases, 865 European ancestry ulcerative colitis cases, 1,086 European ancestry Type 1 diabetes cases, 1,123 Eur…	NA	1p31.3	1	67203951	IL23R	IL23R			149233			rs11580078-G	rs11580078	0	11580078	intron_variant	0	0.43	8e-11	10.0969				Illumina [7347414] (imputed)	N
2016-08-31	26301688	Li YR	2015-08-24	Nat Med	www.ncbi.nlm.nih.gov/pubmed/26301688	Meta-analysis of shared genetic architecture across ten pediatric autoimmune diseases.	Pediatric autoimmune diseases	97 European ancestry thyroiditis cases, 107 European ancestry ankylosing spondylitis cases, 100 European ancestry psoriasis cases, 173 European ancestry celiac disease cases, 254 European ancestry systemic lupus erythematosus cases, 308 European ancestry common variable inmunodeficiency cases, 865 European ancestry ulcerative colitis cases, 1,086 European ancestry Type 1 diabetes cases, 1,123 Eur…	NA	1p13.2	1	113761186	PTPN22	PHTF1 - RSBN1	10745	54665		1298	646	rs6679677-A	rs6679677	0	6679677	upstream_gene_variant	1	0.09	8e-11	10.0969				Illumina [7347414] (imputed)	N
2016-08-31	26301688	Li YR	2015-08-24	Nat Med	www.ncbi.nlm.nih.gov/pubmed/26301688	Meta-analysis of shared genetic architecture across ten pediatric autoimmune diseases.	Pediatric autoimmune diseases	97 European ancestry thyroiditis cases, 107 European ancestry ankylosing spondylitis cases, 100 European ancestry psoriasis cases, 173 European ancestry celiac disease cases, 254 European ancestry systemic lupus erythematosus cases, 308 European ancestry common variable inmunodeficiency cases, 865 European ancestry ulcerative colitis cases, 1,086 European ancestry Type 1 diabetes cases, 1,123 Eur…	NA	1p31.1	1	81771892	LPHN2	ADGRL2			23266			rs2066363-C	rs2066363	0	2066363	intron_variant	0	0.34	8e-11	10.0969				Illumina [7347414] (imputed)	N
2011-09-21	21829393	Plagnol V	2011-08-04	PLoS Genet	www.ncbi.nlm.nih.gov/pubmed/21829393	Genome-wide association analysis of autoantibody positivity in type 1 diabetes cases.	Type 1 diabetes	8,506 European ancestry cases, up to 10,596 European ancestry controls	NA	1q32.1	1	206766559	IL10	LOC105372877 - IL10	105372877	3586		14157	1044	rs3024505-G	rs3024505	0	3024505	downstream_gene_variant	1	NR	5e-10	9.30103		1.2	[NR]	Affymetrix, Illumina [NR]	N
2009-06-01	19430480	Barrett JC	2009-05-10	Nat Genet	www.ncbi.nlm.nih.gov/pubmed/19430480	Genome-wide association study and meta-analysis find that over 40 loci affect risk of type 1 diabetes.	Type 1 diabetes	7,514 cases, 9,045 controls	4,267 cases, 4,670 controls, 4,342 trios from 2,319 families	1q32.1	1	206766559	IL10	LOC105372877 - IL10	105372877	3586		14157	1044	rs3024505-?	rs3024505	0	3024505	downstream_gene_variant	1	0.83	2e-09	8.69897		1.19	[1.10-1.30]	Affymetrix, Illumina [841622] (imputed)	N
2016-12-05	27207532	Roshandel D	2016-04-12	Diabetes	www.ncbi.nlm.nih.gov/pubmed/27207532	A New Locus for Skin Intrinsic Fluorescence in Type 1 Diabetes also Associated with Blood and Skin Glycated Proteins.	Skin fluorescence in type 1 diabetes	1,359 European ancestry cases	NA	1p31.1	1	78360228	PTGFR, MGC27382	MGC27382			149047			rs7533564-C	rs7533564	0	7533564	intron_variant	0		2e-09	8.69897		0.138	[0.093-0.183] unit increase	Illumina [7735748] (imputed)	N
2017-07-24	21829393	Plagnol V	2011-08-04	PLoS Genet	www.ncbi.nlm.nih.gov/pubmed/21829393	Genome-wide association analysis of autoantibody positivity in type 1 diabetes cases.	Insulinoma-associated antigen 2 autoantibody levels in type 1 diabetes	2,498 European ancestry cases	3,897 sibling cases	1q23.1	1	157701026	FCRL3	FCRL3 - SONP1	115352	148300		41	7970	rs7528684-T	rs7528684	0	7528684	upstream_gene_variant	1	NR	8e-09	8.09691		1.45		Affymetrix, Illumina [NR]	N
2008-06-16	17632545	Hakonarson H	2007-07-15	Nature	www.ncbi.nlm.nih.gov/pubmed/17632545	A genome-wide association study identifies KIAA0350 as a type 1 diabetes gene.	Type 1 diabetes	467 European ancestry trios, 561 European ancestry cases, 1,143 European ancestry controls	390 European ancestry trios, 1,333 European ancestry cases from 549 families	1p13.2	1	113834946	PTPN22	AP4B1-AS1, PTPN22			100287722, 26191			rs2476601-A	rs2476601	0	2476601	missense_variant	0	0.09	1e-07	7		1.8	[1.44-2.24]	Illumina [543071]	N
2016-08-31	26301688	Li YR	2015-08-24	Nat Med	www.ncbi.nlm.nih.gov/pubmed/26301688	Meta-analysis of shared genetic architecture across ten pediatric autoimmune diseases.	Pediatric autoimmune diseases	97 European ancestry thyroiditis cases, 107 European ancestry ankylosing spondylitis cases, 100 European ancestry psoriasis cases, 173 European ancestry celiac disease cases, 254 European ancestry systemic lupus erythematosus cases, 308 European ancestry common variable inmunodeficiency cases, 865 European ancestry ulcerative colitis cases, 1,086 European ancestry Type 1 diabetes cases, 1,123 Eur…	NA	1q31.3	1	197406337	CRB1	CRB1			23418			rs6689858-C	rs6689858	0	6689858	intron_variant	0	0.29	2e-07	6.69897				Illumina [7347414] (imputed)	N
2009-06-01	19430480	Barrett JC	2009-05-10	Nat Genet	www.ncbi.nlm.nih.gov/pubmed/19430480	Genome-wide association study and meta-analysis find that over 40 loci affect risk of type 1 diabetes.	Type 1 diabetes	7,514 cases, 9,045 controls	4,267 cases, 4,670 controls, 4,342 trios from 2,319 families	1p31.3	1	63643100	PGM1	PGM1			5236			rs2269241-G	rs2269241	0	2269241	intron_variant	0	0.19	4e-07	6.39794		1.1	[1.02-1.18]	Affymetrix, Illumina [841622] (imputed)	N
2016-08-31	26301688	Li YR	2015-08-24	Nat Med	www.ncbi.nlm.nih.gov/pubmed/26301688	Meta-analysis of shared genetic architecture across ten pediatric autoimmune diseases.	Pediatric autoimmune diseases	97 European ancestry thyroiditis cases, 107 European ancestry ankylosing spondylitis cases, 100 European ancestry psoriasis cases, 173 European ancestry celiac disease cases, 254 European ancestry systemic lupus erythematosus cases, 308 European ancestry common variable inmunodeficiency cases, 865 European ancestry ulcerative colitis cases, 1,086 European ancestry Type 1 diabetes cases, 1,123 Eur…	NA	1q24.3	1	172869708	TNFSF18	LOC105371618 - AIMP1P2	105371618	100873064		31921	16239	rs34884278-C	rs34884278	0	34884278	intron_variant	1	0.3	4e-07	6.39794				Illumina [7347414] (imputed)	N
2016-02-04	25936594	Tomer Y	2015-04-27	J Autoimmun	www.ncbi.nlm.nih.gov/pubmed/25936594	Genome wide identification of new genes and pathways in patients with both autoimmune thyroiditis and type 1 diabetes.	Type 1 diabetes and autoimmune thyroid diseases	346 European ancestry cases, 727 European ancestry controls	185 European ancestry cases, 340 European ancestry controls	1p13.2	1	113537449	MAGI3	MAGI3			260425			rs2153977-T	rs2153977	0	2153977	intron_variant	0	NR	4e-07	6.39794		1.491		Illumina [514008]	N
2016-08-31	26301688	Li YR	2015-08-24	Nat Med	www.ncbi.nlm.nih.gov/pubmed/26301688	Meta-analysis of shared genetic architecture across ten pediatric autoimmune diseases.	Pediatric autoimmune diseases	97 European ancestry thyroiditis cases, 107 European ancestry ankylosing spondylitis cases, 100 European ancestry psoriasis cases, 173 European ancestry celiac disease cases, 254 European ancestry systemic lupus erythematosus cases, 308 European ancestry common variable inmunodeficiency cases, 865 European ancestry ulcerative colitis cases, 1,086 European ancestry Type 1 diabetes cases, 1,123 Eur…	NA	1q32.1	1	206760172	IL10	LOC105372877 - IL10	105372877	3586		7770	7431	rs55705316-G	rs55705316	0	55705316	intergenic_variant	1	0.14	1e-06	6				Illumina [7347414] (imputed)	N
2008-11-11	18840781	Grant SF	2008-10-07	Diabetes	www.ncbi.nlm.nih.gov/pubmed/18840781	Follow-up analysis of genome-wide association data identifies novel loci for type 1 diabetes.	Type 1 diabetes	563 European ancestry cases, 1,146 European ancestry controls, 483 European ancestry trios	3,303 European ancestry cases, 4,673 European ancestry controls	1p22.3	1	84845509	EDG7	LPAR3			23566			rs1983853-?	rs1983853	0	1983853	intron_variant	0	NR	2e-06	5.69897		1.2	[1.11-1.29]	Illumina [up to 1000000]	N
2015-05-21	22704111	Hotaling JM	2012-06-13	J Urol	www.ncbi.nlm.nih.gov/pubmed/22704111	Pilot genome-wide association search identifies potential loci for risk of erectile dysfunction in type 1 diabetes using the DCCT/EDIC study cohort.	Erectile dysfunction in type 1 diabetes	125 European ancestry cases, 403 European ancestry controls	NA	1q31.3	1	197051528	F13B	F13B			2165			rs2990510-G	rs2990510	0	2990510	intron_variant	0	0.305	6e-06	5.22185				Illumina [840354]	N
2011-09-21	21829393	Plagnol V	2011-08-04	PLoS Genet	www.ncbi.nlm.nih.gov/pubmed/21829393	Genome-wide association analysis of autoantibody positivity in type 1 diabetes cases.	Type 1 diabetes	8,506 European ancestry cases, up to 10,596 European ancestry controls	NA	2q33.2	2	203874196	CTLA4	CTLA4 - LOC101927840	1493	101927840		236	58119	rs3087243-A	rs3087243	0	3087243	downstream_gene_variant	1	NR	2e-17	16.699		1.2	[NR]	Affymetrix, Illumina [NR]	N
2009-06-01	19430480	Barrett JC	2009-05-10	Nat Genet	www.ncbi.nlm.nih.gov/pubmed/19430480	Genome-wide association study and meta-analysis find that over 40 loci affect risk of type 1 diabetes.	Type 1 diabetes	7,514 cases, 9,045 controls	4,267 cases, 4,670 controls, 4,342 trios from 2,319 families	2q33.2	2	203874196	CTLA4	CTLA4 - LOC101927840	1493	101927840		236	58119	rs3087243-?	rs3087243	0	3087243	downstream_gene_variant	1	NR	1e-15	15				Affymetrix, Illumina [841622] (imputed)	N
2011-09-21	21829393	Plagnol V	2011-08-04	PLoS Genet	www.ncbi.nlm.nih.gov/pubmed/21829393	Genome-wide association analysis of autoantibody positivity in type 1 diabetes cases.	Type 1 diabetes	8,506 European ancestry cases, up to 10,596 European ancestry controls	NA	2q24.2	2	162267541	IFIH1	IFIH1			64135			rs1990760-C	rs1990760	0	1990760	missense_variant	0	NR	2e-14	13.699		1.2	[NR]	Affymetrix, Illumina [NR]	N
2008-06-16	17554260	Todd JA	2007-06-06	Nat Genet	www.ncbi.nlm.nih.gov/pubmed/17554260	Robust associations of four new chromosome regions from genome-wide analyses of type 1 diabetes.	Type 1 diabetes	2,000 European ancestry cases, 3,000 European ancestry controls	2,997 European ancestry trios, 4,000 European ancestry cases, 5,000 European ancestry controls	2q24.2	2	162267541	IFIH1	IFIH1			64135			rs1990760-A	rs1990760	0	1990760	missense_variant	0	0.6	2e-11	10.699		1.18	[1.11-1.23]	Affymetrix [NR]	N
2008-11-26	18978792	Cooper JD	2008-11-02	Nat Genet	www.ncbi.nlm.nih.gov/pubmed/18978792	Meta-analysis of genome-wide association study data identifies additional type 1 diabetes risk loci.	Type 1 diabetes	3,561 European ancestry cases, 4,646 European ancestry controls	6,225 European ancestry cases, 6,946 European ancestry controls, 3,064 European ancestry trios from 2,828 families	2q33.2	2	203874196	CTLA4	CTLA4 - LOC101927840	1493	101927840		236	58119	rs3087243-A	rs3087243	0	3087243	downstream_gene_variant	1	NR	8e-11	10.0969				Affymetrix [up to 335565]	N
2016-08-31	26301688	Li YR	2015-08-24	Nat Med	www.ncbi.nlm.nih.gov/pubmed/26301688	Meta-analysis of shared genetic architecture across ten pediatric autoimmune diseases.	Pediatric autoimmune diseases	97 European ancestry thyroiditis cases, 107 European ancestry ankylosing spondylitis cases, 100 European ancestry psoriasis cases, 173 European ancestry celiac disease cases, 254 European ancestry systemic lupus erythematosus cases, 308 European ancestry common variable inmunodeficiency cases, 865 European ancestry ulcerative colitis cases, 1,086 European ancestry Type 1 diabetes cases, 1,123 Eur…	NA	2q37.1	2	233276621	ATG16L1	ATG16L1			55054			rs36001488-C	rs36001488	0	36001488	intron_variant	0	0.48	8e-11	10.0969				Illumina [7347414] (imputed)	N
2011-10-26	21980299	Bradfield JP	2011-09-29	PLoS Genet	www.ncbi.nlm.nih.gov/pubmed/21980299	A genome-wide meta-analysis of six type 1 diabetes cohorts identifies multiple associated loci.	Type 1 diabetes	9,934 European ancestry cases, 16,956 European ancestry controls	1,120 European ancestry affected trios	2p23.3	2	25078886	EFR3B, 3NCOA1, C2orf79, CENPO, ADCY3, DNAJC27, POMC, DNMT3A	EFR3B			22979			rs478222-?	rs478222	0	478222	intron_variant	0	0.59	4e-09	8.39794		1.22	[NR]	Affymetrix, Illumina [~ 2540000] (imputed)	N
2009-06-01	19430480	Barrett JC	2009-05-10	Nat Genet	www.ncbi.nlm.nih.gov/pubmed/19430480	Genome-wide association study and meta-analysis find that over 40 loci affect risk of type 1 diabetes.	Type 1 diabetes	7,514 cases, 9,045 controls	4,267 cases, 4,670 controls, 4,342 trios from 2,319 families	2q24.2	2	162267541	IFIH1	IFIH1			64135			rs1990760-?	rs1990760	0	1990760	missense_variant	0	NR	7e-09	8.1549				Affymetrix, Illumina [841622] (imputed)	N
2012-12-11	23028342	Sandholm N	2012-09-20	PLoS Genet	www.ncbi.nlm.nih.gov/pubmed/23028342	New susceptibility loci associated with kidney disease in type 1 diabetes.	Type 1 diabetes nephropathy	Up to 2,916 European ancestry Type 1 Diabetes cases with nephropathy, 3,315 European ancestry Type 1 Diabetes cases without nephropathy	Up to 1,493 European ancestry Type 1 Diabetes cases with nephropathy, 3,191 European ancestry Type 1 Diabetes cases without nephropathy	2q11.2	2	99844192	AFF3	AFF3			3899			rs7583877-C	rs7583877	0	7583877	intron_variant	0	0.29	1e-08	8	(ESRD vs. non-ESRD)	1.29	[1.18-1.40]	Affymetrix, Illumina [~ 2500000] (imputed)	N
2014-03-22	24029427	Sandholm N	2013-09-12	J Am Soc Nephrol	www.ncbi.nlm.nih.gov/pubmed/24029427	Chromosome 2q31.1 associates with ESRD in women with type 1 diabetes.	End-stage renal disease in Type 1 diabetics	258 European ancestry female cases, 935 European ancestry female controls, 387 European ancestry male cases, 655 European ancestry male controls	178 European ancestry female cases, 594 European ancestry female controls, 251 European ancestry male cases, 494 European ancestry male controls, 252 female cases, 479 female controls, 256 male cases, 342 male controls	2q31.1	2	173598126	CDCA7, SP3	LOC107985961			107985961			rs4972593-A	rs4972593	0	4972593	intergenic_variant	0	0.14	4e-08	7.39794	(Women)	1.81	[1.47-2.24]	Illumina [2400000] (imputed)	N
2016-08-31	26301688	Li YR	2015-08-24	Nat Med	www.ncbi.nlm.nih.gov/pubmed/26301688	Meta-analysis of shared genetic architecture across ten pediatric autoimmune diseases.	Pediatric autoimmune diseases	97 European ancestry thyroiditis cases, 107 European ancestry ankylosing spondylitis cases, 100 European ancestry psoriasis cases, 173 European ancestry celiac disease cases, 254 European ancestry systemic lupus erythematosus cases, 308 European ancestry common variable inmunodeficiency cases, 865 European ancestry ulcerative colitis cases, 1,086 European ancestry Type 1 diabetes cases, 1,123 Eur…	NA	2q12.1	2	102464132	IL18R1	IL18RAP - SLC9A4	8807	389015		11564	9150	rs2075184-T	rs2075184	0	2075184	intergenic_variant	1	0.23	9e-08	7.04576				Illumina [7347414] (imputed)	N
2016-08-31	26301688	Li YR	2015-08-24	Nat Med	www.ncbi.nlm.nih.gov/pubmed/26301688	Meta-analysis of shared genetic architecture across ten pediatric autoimmune diseases.	Pediatric autoimmune diseases	97 European ancestry thyroiditis cases, 107 European ancestry ankylosing spondylitis cases, 100 European ancestry psoriasis cases, 173 European ancestry celiac disease cases, 254 European ancestry systemic lupus erythematosus cases, 308 European ancestry common variable inmunodeficiency cases, 865 European ancestry ulcerative colitis cases, 1,086 European ancestry Type 1 diabetes cases, 1,123 Eur…	NA	2q37.3	2	240624322	GPR35	GPR35			2859			rs4676410-A	rs4676410	0	4676410	intron_variant	0	0.19	2e-07	6.69897				Illumina [7347414] (imputed)	N
2016-08-31	26301688	Li YR	2015-08-24	Nat Med	www.ncbi.nlm.nih.gov/pubmed/26301688	Meta-analysis of shared genetic architecture across ten pediatric autoimmune diseases.	Pediatric autoimmune diseases	97 European ancestry thyroiditis cases, 107 European ancestry ankylosing spondylitis cases, 100 European ancestry psoriasis cases, 173 European ancestry celiac disease cases, 254 European ancestry systemic lupus erythematosus cases, 308 European ancestry common variable inmunodeficiency cases, 865 European ancestry ulcerative colitis cases, 1,086 European ancestry Type 1 diabetes cases, 1,123 Eur…	NA	2p25.3	2	2944140	TSSC1	LINC01250			101927554			rs114846446-A	rs114846446	0	114846446	intron_variant	0	0.01	2e-07	6.69897				Illumina [7347414] (imputed)	N
2012-12-11	23028342	Sandholm N	2012-09-20	PLoS Genet	www.ncbi.nlm.nih.gov/pubmed/23028342	New susceptibility loci associated with kidney disease in type 1 diabetes.	Type 1 diabetes nephropathy	Up to 2,916 European ancestry Type 1 Diabetes cases with nephropathy, 3,315 European ancestry Type 1 Diabetes cases without nephropathy	Up to 1,493 European ancestry Type 1 Diabetes cases with nephropathy, 3,191 European ancestry Type 1 Diabetes cases without nephropathy	2q34	2	212304043	ERBB4	ERBB4			2066			rs7588550-A	rs7588550	0	7588550	intron_variant	0	0.95	2e-07	6.69897	(T1DN)	1.52	[1.30-1.79]	Affymetrix, Illumina [~ 2500000] (imputed)	N
2012-12-11	23028342	Sandholm N	2012-09-20	PLoS Genet	www.ncbi.nlm.nih.gov/pubmed/23028342	New susceptibility loci associated with kidney disease in type 1 diabetes.	Type 1 diabetes nephropathy	Up to 2,916 European ancestry Type 1 Diabetes cases with nephropathy, 3,315 European ancestry Type 1 Diabetes cases without nephropathy	Up to 1,493 European ancestry Type 1 Diabetes cases with nephropathy, 3,191 European ancestry Type 1 Diabetes cases without nephropathy	2q11.2	2	99844192	AFF3	AFF3			3899			rs7583877-C	rs7583877	0	7583877	intron_variant	0	0.3	3e-07	6.52288	(ESRD)	1.29	[1.17-1.42]	Affymetrix, Illumina [~ 2500000] (imputed)	N
2017-03-31	27647854	Sandholm N	2016-09-19	J Am Soc Nephrol	www.ncbi.nlm.nih.gov/pubmed/27647854	The Genetic Landscape of Renal Complications in Type 1 Diabetes.	Kidney disease (end stage renal disease vs non-end stage renal disease) in type 1 diabetes	729 European ancestry cases, 84 cases, 3,290 European ancestry controls, 705 controls	94 European ancestry cases, 964 cases, 993 European ancestry controls, 4806 controls	2q11.2	2	99767892	AFF3	AFF3			3899			rs7562121-C	rs7562121	0	7562121	intron_variant	0	0.24	4e-07	6.39794		1.27	[1.17-1.39]	Illumina [NR] (imputed)	N
2011-10-26	21980299	Bradfield JP	2011-09-29	PLoS Genet	www.ncbi.nlm.nih.gov/pubmed/21980299	A genome-wide meta-analysis of six type 1 diabetes cohorts identifies multiple associated loci.	Type 1 diabetes	9,934 European ancestry cases, 16,956 European ancestry controls	1,120 European ancestry affected trios	2p23.2	2	28423934	FOSL2	FOSL2 - LOC102723530	2355	102723530		6622	24586	rs6547853-?	rs6547853	0	6547853	upstream_gene_variant	1	0.6	8e-07	6.09691		1.19	[NR]	Affymetrix, Illumina [~ 2540000] (imputed)	N
2009-06-01	19430480	Barrett JC	2009-05-10	Nat Genet	www.ncbi.nlm.nih.gov/pubmed/19430480	Genome-wide association study and meta-analysis find that over 40 loci affect risk of type 1 diabetes.	Type 1 diabetes	7,514 cases, 9,045 controls	4,267 cases, 4,670 controls, 4,342 trios from 2,319 families	2p24.3	2	12500615	intergenic	LOC100506457			100506457			rs1534422-G	rs1534422	0	1534422	intron_variant	0	0.46	2e-06	5.69897		1.08	[1.02-1.15]	Affymetrix, Illumina [841622] (imputed)	N
2015-05-21	22704111	Hotaling JM	2012-06-13	J Urol	www.ncbi.nlm.nih.gov/pubmed/22704111	Pilot genome-wide association search identifies potential loci for risk of erectile dysfunction in type 1 diabetes using the DCCT/EDIC study cohort.	Erectile dysfunction in type 1 diabetes	125 European ancestry cases, 403 European ancestry controls	NA	2q31.1	2	172628350	PDK1	PDK1			5163			rs836589-A	rs836589	0	836589	intergenic_variant	0	0.186	2e-06	5.69897				Illumina [840354]	N
2017-03-31	27647854	Sandholm N	2016-09-19	J Am Soc Nephrol	www.ncbi.nlm.nih.gov/pubmed/27647854	The Genetic Landscape of Renal Complications in Type 1 Diabetes.	Kidney disease (early stage) in type 1 diabetes	555 European ancestry cases, 245 cases, 1,903 European ancestry controls, 690 controls	602 cases, 1,459 controls	2p24.1	2	20398749	NR	SLC7A15P - RNA5SP86	100289450	100873319		2164	2878	rs10186458-C	rs10186458	0	10186458	downstream_gene_variant	1	0.44	2e-06	5.69897		1.24	[1.13-1.35]	Illumina [NR] (imputed)	N
2008-11-26	18978792	Cooper JD	2008-11-02	Nat Genet	www.ncbi.nlm.nih.gov/pubmed/18978792	Meta-analysis of genome-wide association study data identifies additional type 1 diabetes risk loci.	Type 1 diabetes	3,561 European ancestry cases, 4,646 European ancestry controls	6,225 European ancestry cases, 6,946 European ancestry controls, 3,064 European ancestry trios from 2,828 families	2p23.3	2	24469940	intergenic	LOC105374329 - NCOA1	105374329	8648		6786	22110	rs2165738-C	rs2165738	0	2165738	intergenic_variant	1	0.27	4e-06	5.39794		1.07	[1.01-1.13]	Affymetrix [up to 335565]	N
2008-06-16	17554260	Todd JA	2007-06-06	Nat Genet	www.ncbi.nlm.nih.gov/pubmed/17554260	Robust associations of four new chromosome regions from genome-wide analyses of type 1 diabetes.	Type 1 diabetes	2,000 European ancestry cases, 3,000 European ancestry controls	2,997 European ancestry trios, 4,000 European ancestry cases, 5,000 European ancestry controls	2q11.2	2	100208905	AFF3, LOC150577	LINC01104			150577			rs9653442-G	rs9653442	0	9653442	intron_variant	0	0.46	5e-06	5.30103		1.11	[1.05-1.17]	Affymetrix [NR]	N
2017-03-31	27647854	Sandholm N	2016-09-19	J Am Soc Nephrol	www.ncbi.nlm.nih.gov/pubmed/27647854	The Genetic Landscape of Renal Complications in Type 1 Diabetes.	Kidney disease (early stage) in type 1 diabetes	555 European ancestry cases, 245 cases, 1,903 European ancestry controls, 690 controls	602 cases, 1,459 controls	2q35	2	216505032	NR	RPL37A - LOC101928156	6168	101928156		3565	14102	rs35612822-A	rs35612822	0	35612822	intron_variant	1	0.68	7e-06	5.1549		1.24	[1.13-1.37]	Illumina [NR] (imputed)	N
2016-08-31	26301688	Li YR	2015-08-24	Nat Med	www.ncbi.nlm.nih.gov/pubmed/26301688	Meta-analysis of shared genetic architecture across ten pediatric autoimmune diseases.	Pediatric autoimmune diseases	97 European ancestry thyroiditis cases, 107 European ancestry ankylosing spondylitis cases, 100 European ancestry psoriasis cases, 173 European ancestry celiac disease cases, 254 European ancestry systemic lupus erythematosus cases, 308 European ancestry common variable inmunodeficiency cases, 865 European ancestry ulcerative colitis cases, 1,086 European ancestry Type 1 diabetes cases, 1,123 Eur…	NA	3p21.31	3	49534707	DAG1	DAG1			1605			rs4625-G	rs4625	0	4625	3_prime_UTR_variant	0	0.31	8e-11	10.0969				Illumina [7347414] (imputed)	N
2015-05-21	22704111	Hotaling JM	2012-06-13	J Urol	www.ncbi.nlm.nih.gov/pubmed/22704111	Pilot genome-wide association search identifies potential loci for risk of erectile dysfunction in type 1 diabetes using the DCCT/EDIC study cohort.	Erectile dysfunction in type 1 diabetes	125 European ancestry cases, 403 European ancestry controls	NA	3q13.11	3	105292046	ALCAM	LOC105374023 - ALCAM	105374023	214		274051	74667	rs9810233-G	rs9810233	0	9810233	intergenic_variant	1	0.27	7e-07	6.1549				Illumina [840354]	N
2015-05-21	22704111	Hotaling JM	2012-06-13	J Urol	www.ncbi.nlm.nih.gov/pubmed/22704111	Pilot genome-wide association search identifies potential loci for risk of erectile dysfunction in type 1 diabetes using the DCCT/EDIC study cohort.	Erectile dysfunction in type 1 diabetes	125 European ancestry cases, 403 European ancestry controls	NA	3p22.2	3	36638607	STAC	NBPF21P - RN7SKP227	205655	106481818		810	46433	rs950146-C	rs950146	0	950146	upstream_gene_variant	1	0.491	4e-06	5.39794				Illumina [840354]	N
2015-05-21	22704111	Hotaling JM	2012-06-13	J Urol	www.ncbi.nlm.nih.gov/pubmed/22704111	Pilot genome-wide association search identifies potential loci for risk of erectile dysfunction in type 1 diabetes using the DCCT/EDIC study cohort.	Erectile dysfunction in type 1 diabetes	125 European ancestry cases, 403 European ancestry controls	NA	3p12.2	3	80816613	SLC25A36	LOC105377175 - LOC105377174	105377175	105377174		26825	6436	rs9850224-A	rs9850225	0	9850225	intergenic_variant	1	0.01	5e-06	5.30103				Illumina [840354]	N
2009-06-01	19430480	Barrett JC	2009-05-10	Nat Genet	www.ncbi.nlm.nih.gov/pubmed/19430480	Genome-wide association study and meta-analysis find that over 40 loci affect risk of type 1 diabetes.	Type 1 diabetes	7,514 cases, 9,045 controls	4,267 cases, 4,670 controls, 4,342 trios from 2,319 families	4q27	4	122211337	IL2	KIAA1109			84162			rs4505848-?	rs4505848	0	4505848	intron_variant	0	NR	5e-13	12.301				Affymetrix, Illumina [841622] (imputed)	N
2016-08-31	26301688	Li YR	2015-08-24	Nat Med	www.ncbi.nlm.nih.gov/pubmed/26301688	Meta-analysis of shared genetic architecture across ten pediatric autoimmune diseases.	Pediatric autoimmune diseases	97 European ancestry thyroiditis cases, 107 European ancestry ankylosing spondylitis cases, 100 European ancestry psoriasis cases, 173 European ancestry celiac disease cases, 254 European ancestry systemic lupus erythematosus cases, 308 European ancestry common variable inmunodeficiency cases, 865 European ancestry ulcerative colitis cases, 1,086 European ancestry Type 1 diabetes cases, 1,123 Eur…	NA	4q35.1	4	182824168	TNM3	TENM3 - LOC105377576	55714	105377576		21144	46957	rs7660520-A	rs7660520	0	7660520	intergenic_variant	1	0.26	8e-11	10.0969				Illumina [7347414] (imputed)	N
2016-02-04	25936594	Tomer Y	2015-04-27	J Autoimmun	www.ncbi.nlm.nih.gov/pubmed/25936594	Genome wide identification of new genes and pathways in patients with both autoimmune thyroiditis and type 1 diabetes.	Type 1 diabetes and autoimmune thyroid diseases	346 European ancestry cases, 727 European ancestry controls	185 European ancestry cases, 340 European ancestry controls	4q27	4	121392885	GPR103	LOC107986309			107986309			rs7679475-A	rs7679475	0	7679475	intergenic_variant	0	NR	4e-10	9.39794		1.6198		Illumina [514008]	N
2009-06-01	19430480	Barrett JC	2009-05-10	Nat Genet	www.ncbi.nlm.nih.gov/pubmed/19430480	Genome-wide association study and meta-analysis find that over 40 loci affect risk of type 1 diabetes.	Type 1 diabetes	7,514 cases, 9,045 controls	4,267 cases, 4,670 controls, 4,342 trios from 2,319 families	4p15.2	4	26083889	intergenic	LOC105374540			105374540			rs10517086-A	rs10517086	0	10517086	intron_variant	0	0.3	5e-10	9.30103		1.09	[1.02-1.17]	Affymetrix, Illumina [841622] (imputed)	N
2016-08-31	26301688	Li YR	2015-08-24	Nat Med	www.ncbi.nlm.nih.gov/pubmed/26301688	Meta-analysis of shared genetic architecture across ten pediatric autoimmune diseases.	Pediatric autoimmune diseases	97 European ancestry thyroiditis cases, 107 European ancestry ankylosing spondylitis cases, 100 European ancestry psoriasis cases, 173 European ancestry celiac disease cases, 254 European ancestry systemic lupus erythematosus cases, 308 European ancestry common variable inmunodeficiency cases, 865 European ancestry ulcerative colitis cases, 1,086 European ancestry Type 1 diabetes cases, 1,123 Eur…	NA	4q27	4	122639784	IL21	IL21-AS1			100996941			rs62324212-A	rs62324212	0	62324212	intron_variant	0	0.42	3e-08	7.52288				Illumina [7347414] (imputed)	N
2016-08-31	26301688	Li YR	2015-08-24	Nat Med	www.ncbi.nlm.nih.gov/pubmed/26301688	Meta-analysis of shared genetic architecture across ten pediatric autoimmune diseases.	Pediatric autoimmune diseases	97 European ancestry thyroiditis cases, 107 European ancestry ankylosing spondylitis cases, 100 European ancestry psoriasis cases, 173 European ancestry celiac disease cases, 254 European ancestry systemic lupus erythematosus cases, 308 European ancestry common variable inmunodeficiency cases, 865 European ancestry ulcerative colitis cases, 1,086 European ancestry Type 1 diabetes cases, 1,123 Eur…	NA	4p16.2	4	4990640	CYTL1	LOC101928306 - CYTL1	101928306	54360		1969	23946	rs7672495-C	rs7672495	0	7672495	intergenic_variant	1	0.18	1e-07	7				Illumina [7347414] (imputed)	N
2017-09-14	28672053	Meng W	2017-07-03	Br J Dermatol	www.ncbi.nlm.nih.gov/pubmed/28672053	A genome-wide association study suggested that the mitogen-activated protein kinase 14 gene (MAPK14) is associated with diabetic foot ulcer.	Foot ulcer and neuropathy in diabetes	662 European ancestry type 2 diabetes and neuropathy cases, 37 European ancestry type 1 diabetes and neuropathy cases, 4,250 European ancestry type 1 and type 2 diabetes controls	NA	4q12	4	53790270	NR	LOC100506444 - LOC100129728	100506444	100129728		55912	136923	rs71597855-?	rs71597855	0	71597855	intron_variant	1	NR	1e-07	7		2.678	[1.856-3.863]	Affymetrix, Illumina [6706850] (imputed)	N
2011-09-21	21829393	Plagnol V	2011-08-04	PLoS Genet	www.ncbi.nlm.nih.gov/pubmed/21829393	Genome-wide association analysis of autoantibody positivity in type 1 diabetes cases.	Type 1 diabetes	8,506 European ancestry cases, up to 10,596 European ancestry controls	NA	4q27	4	122456825	IL2	IL2 - IL21	3558	59067		330	155803	rs2069762-A	rs2069762	0	2069762	upstream_gene_variant	1	NR	5e-07	6.30103		1.12	[NR]	Affymetrix, Illumina [NR]	N
2012-12-11	23028342	Sandholm N	2012-09-20	PLoS Genet	www.ncbi.nlm.nih.gov/pubmed/23028342	New susceptibility loci associated with kidney disease in type 1 diabetes.	Type 1 diabetes nephropathy	Up to 2,916 European ancestry Type 1 Diabetes cases with nephropathy, 3,315 European ancestry Type 1 Diabetes cases without nephropathy	Up to 1,493 European ancestry Type 1 Diabetes cases with nephropathy, 3,191 European ancestry Type 1 Diabetes cases without nephropathy	4q34.1	4	173653255	intergenic	RANP6 - LOC107986203	100128266	107986203		18840	44104	rs11723864-G	rs11723864	0	11723864	intergenic_variant	1	0.11	7e-07	6.1549	(ESRD)	1.51	[1.29-1.78]	Affymetrix, Illumina [~ 2500000] (imputed)	N
2014-11-01	24595857	Sandholm N	2014-03-05	Diabetologia	www.ncbi.nlm.nih.gov/pubmed/24595857	Genome-wide association study of urinary albumin excretion rate in patients with type 1 diabetes.	Urinary albumin excretion rate in type 1 diabetes	1,925 European ancestry cases	3,750 European ancestry cases	4q34.1	4	174721548	GLRA3	GLRA3			8001			rs11725853-A	rs11725853	0	11725853	intron_variant	0	0.15	8e-07	6.09691		0.11	[0.07-0.16] unit increase	Illumina [2400000] (imputed)	N
2017-03-31	27647854	Sandholm N	2016-09-19	J Am Soc Nephrol	www.ncbi.nlm.nih.gov/pubmed/27647854	The Genetic Landscape of Renal Complications in Type 1 Diabetes.	Kidney disease (early stage) in type 1 diabetes	555 European ancestry cases, 245 cases, 1,903 European ancestry controls, 690 controls	602 cases, 1,459 controls	4p15.32	4	16155043	NR	LOC105374502 - TAPT1	105374502	202018		28878	5462	rs317865-G	rs317865	0	317865	intergenic_variant	1	0.12	2e-06	5.69897		1.37	[1.19-1.57]	Illumina [NR] (imputed)	N
2017-03-31	27647854	Sandholm N	2016-09-19	J Am Soc Nephrol	www.ncbi.nlm.nih.gov/pubmed/27647854	The Genetic Landscape of Renal Complications in Type 1 Diabetes.	Kidney disease (end stage renal disease vs non-end stage renal disease) in type 1 diabetes	729 European ancestry cases, 84 cases, 3,290 European ancestry controls, 705 controls	94 European ancestry cases, 964 cases, 993 European ancestry controls, 4806 controls	4q21.3	4	86607925	PTPN13	PTPN13			5783			rs61277444-G	rs61277444	0	61277444	intron_variant	0	0.08	2e-06	5.69897		1.41	[1.21-1.65]	Illumina [NR] (imputed)	N
2008-06-16	17554300	WTCCC	2007-06-07	Nature	www.ncbi.nlm.nih.gov/pubmed/17554300	Genome-wide association study of 14,000 cases of seven common diseases and 3,000 shared controls.	Type 1 diabetes	1,963 European ancestry cases, 2,938 European ancestry controls	(see Todd 2007)	4q27	4	122277280	NR	KIAA1109			84162			rs6534347-A	rs6534347	0	6534347	intron_variant	0	0.35	2e-06	5.69897		1.3	[1.10-1.55]	Affymetrix [469557]	N
2008-06-16	17554300	WTCCC	2007-06-07	Nature	www.ncbi.nlm.nih.gov/pubmed/17554300	Genome-wide association study of 14,000 cases of seven common diseases and 3,000 shared controls.	Type 1 diabetes	1,963 European ancestry cases, 2,938 European ancestry controls	(see Todd 2007)	4q27	4	122408207	NR	ADAD1			132612			rs17388568-A	rs17388568	0	17388568	intron_variant	0	0.26	3e-06	5.52288		1.26	[1.11-1.42]	Affymetrix [469557]	N
2011-09-21	21829393	Plagnol V	2011-08-04	PLoS Genet	www.ncbi.nlm.nih.gov/pubmed/21829393	Genome-wide association analysis of autoantibody positivity in type 1 diabetes cases.	Type 1 diabetes	8,506 European ancestry cases, up to 10,596 European ancestry controls	NA	4q27	4	122408207	ADAD1	ADAD1			132612			rs17388568-A	rs17388568	0	17388568	intron_variant	0	NR	6e-06	5.22185		1.1	[NR]	Affymetrix, Illumina [NR]	N
2017-03-31	27647854	Sandholm N	2016-09-19	J Am Soc Nephrol	www.ncbi.nlm.nih.gov/pubmed/27647854	The Genetic Landscape of Renal Complications in Type 1 Diabetes.	Kidney disease (end stage renal disease vs normoalbuminuria) in type 1 diabetes	729 European ancestry cases, 84 cases, 1,903 European ancestry controls, 491 controls	94 European ancestry cases, 964 cases, 627 European ancestry controls, 3187 controls	4q21.3	4	86607925	PTPN13	PTPN13			5783			rs61277444-G	rs61277444	0	61277444	intron_variant	0	0.08	6e-06	5.22185		1.42	[1.20-1.67]	Illumina [NR] (imputed)	N
2016-08-31	26301688	Li YR	2015-08-24	Nat Med	www.ncbi.nlm.nih.gov/pubmed/26301688	Meta-analysis of shared genetic architecture across ten pediatric autoimmune diseases.	Pediatric autoimmune diseases	97 European ancestry thyroiditis cases, 107 European ancestry ankylosing spondylitis cases, 100 European ancestry psoriasis cases, 173 European ancestry celiac disease cases, 254 European ancestry systemic lupus erythematosus cases, 308 European ancestry common variable inmunodeficiency cases, 865 European ancestry ulcerative colitis cases, 1,086 European ancestry Type 1 diabetes cases, 1,123 Eur…	NA	5p13.1	5	40487168	PTGER4	LOC105374736 - LOC105374737	105374736	105374737		159517	112782	rs7725052-C	rs7725052	0	7725052	regulatory_region_variant	1	0.43	8e-11	10.0969				Illumina [7347414] (imputed)	N
2016-08-31	26301688	Li YR	2015-08-24	Nat Med	www.ncbi.nlm.nih.gov/pubmed/26301688	Meta-analysis of shared genetic architecture across ten pediatric autoimmune diseases.	Pediatric autoimmune diseases	97 European ancestry thyroiditis cases, 107 European ancestry ankylosing spondylitis cases, 100 European ancestry psoriasis cases, 173 European ancestry celiac disease cases, 254 European ancestry systemic lupus erythematosus cases, 308 European ancestry common variable inmunodeficiency cases, 865 European ancestry ulcerative colitis cases, 1,086 European ancestry Type 1 diabetes cases, 1,123 Eur…	NA	5q11.2	5	56148856	ANKRD55	ANKRD55			79722			rs7731626-A	rs7731626	0	7731626	intron_variant	0	0.39	1e-10	10				Illumina [7347414] (imputed)	N
2016-08-31	26301688	Li YR	2015-08-24	Nat Med	www.ncbi.nlm.nih.gov/pubmed/26301688	Meta-analysis of shared genetic architecture across ten pediatric autoimmune diseases.	Pediatric autoimmune diseases	97 European ancestry thyroiditis cases, 107 European ancestry ankylosing spondylitis cases, 100 European ancestry psoriasis cases, 173 European ancestry celiac disease cases, 254 European ancestry systemic lupus erythematosus cases, 308 European ancestry common variable inmunodeficiency cases, 865 European ancestry ulcerative colitis cases, 1,086 European ancestry Type 1 diabetes cases, 1,123 Eur…	NA	5q33.3	5	159402286	IL12B	LOC285626 - LOC285627	285626	285627		39452	46270	rs755374-T	rs755374	0	755374	intron_variant	1	0.32	2e-10	9.69897				Illumina [7347414] (imputed)	N
2016-08-31	26301688	Li YR	2015-08-24	Nat Med	www.ncbi.nlm.nih.gov/pubmed/26301688	Meta-analysis of shared genetic architecture across ten pediatric autoimmune diseases.	Pediatric autoimmune diseases	97 European ancestry thyroiditis cases, 107 European ancestry ankylosing spondylitis cases, 100 European ancestry psoriasis cases, 173 European ancestry celiac disease cases, 254 European ancestry systemic lupus erythematosus cases, 308 European ancestry common variable inmunodeficiency cases, 865 European ancestry ulcerative colitis cases, 1,086 European ancestry Type 1 diabetes cases, 1,123 Eur…	NA	5q31.1	5	132475490	IL5	C5orf56			441108			rs11741255-A	rs11741255	0	11741255	intron_variant	0	0.42	2e-09	8.69897				Illumina [7347414] (imputed)	N
2016-08-31	26301688	Li YR	2015-08-24	Nat Med	www.ncbi.nlm.nih.gov/pubmed/26301688	Meta-analysis of shared genetic architecture across ten pediatric autoimmune diseases.	Pediatric autoimmune diseases	97 European ancestry thyroiditis cases, 107 European ancestry ankylosing spondylitis cases, 100 European ancestry psoriasis cases, 173 European ancestry celiac disease cases, 254 European ancestry systemic lupus erythematosus cases, 308 European ancestry common variable inmunodeficiency cases, 865 European ancestry ulcerative colitis cases, 1,086 European ancestry Type 1 diabetes cases, 1,123 Eur…	NA	5q15	5	96888176	ERAP2	ERAP2, ERAP1			64167, 51752			rs4869313-T	rs4869313	0	4869313	intron_variant	0	0.42	9e-08	7.04576				Illumina [7347414] (imputed)	N
2008-06-16	17554300	WTCCC	2007-06-07	Nature	www.ncbi.nlm.nih.gov/pubmed/17554300	Genome-wide association study of 14,000 cases of seven common diseases and 3,000 shared controls.	Type 1 diabetes	1,963 European ancestry cases, 2,938 European ancestry controls	(see Todd 2007)	5q31.1	5	133293192	NR	FSTL4			23105			rs17166496-G	rs17166496	0	17166496	intron_variant	0	0.61	5e-06	5.30103		1.3	[1.15-1.47]	Affymetrix [469557]	N
2008-06-16	17554260	Todd JA	2007-06-06	Nat Genet	www.ncbi.nlm.nih.gov/pubmed/17554260	Robust associations of four new chromosome regions from genome-wide analyses of type 1 diabetes.	Type 1 diabetes	2,000 European ancestry cases, 3,000 European ancestry controls	2,997 European ancestry trios, 4,000 European ancestry cases, 5,000 European ancestry controls	5p13.2	5	35910427	CAPSL	CAPSL			133690			rs1445898-G	rs1445898	0	1445898	missense_variant	0	0.55	8e-06	5.09691		1.12	[1.06-1.19]	Affymetrix [NR]	N
2008-06-16	17554260	Todd JA	2007-06-06	Nat Genet	www.ncbi.nlm.nih.gov/pubmed/17554260	Robust associations of four new chromosome regions from genome-wide analyses of type 1 diabetes.	Type 1 diabetes	2,000 European ancestry cases, 3,000 European ancestry controls	2,997 European ancestry trios, 4,000 European ancestry cases, 5,000 European ancestry controls	5p13.2	5	35874473	IL7R	IL7R			3575			rs6897932-G	rs6897932	0	6897932	missense_variant	0	0.71	8e-06	5.09691		1.12	[1.06-1.19]	Affymetrix [NR]	N
2017-03-31	27647854	Sandholm N	2016-09-19	J Am Soc Nephrol	www.ncbi.nlm.nih.gov/pubmed/27647854	The Genetic Landscape of Renal Complications in Type 1 Diabetes.	Kidney disease (late stage) in type 1 diabetes	1,507 European ancestry cases, 250 controls, 1,903 European ancestry controls, 690 controls	2,536 cases, 3,907 controls	5q34	5	167551225	NR	TENM2			57451			rs72831309-A	rs72831309	0	72831309	intron_variant	0	0.04	9e-06	5.04576		1.66	[1.34-2.06]	Illumina [NR] (imputed)	N
2008-06-16	17554300	WTCCC	2007-06-07	Nature	www.ncbi.nlm.nih.gov/pubmed/17554300	Genome-wide association study of 14,000 cases of seven common diseases and 3,000 shared controls.	Type 1 diabetes	1,963 European ancestry cases, 2,938 European ancestry controls	(see Todd 2007)	6p21.32	6	32636595	MHC	HLA-DRB1 - LOC107986589	3123	107986589		46759	593	rs9272346-G	rs9272346	0	9272346	intron_variant	1	0.61	5e-134	133.301		5.49	[4.83-6.24]	Affymetrix [469557]	N
2008-11-26	18978792	Cooper JD	2008-11-02	Nat Genet	www.ncbi.nlm.nih.gov/pubmed/18978792	Meta-analysis of genome-wide association study data identifies additional type 1 diabetes risk loci.	Type 1 diabetes	3,561 European ancestry cases, 4,646 European ancestry controls	6,225 European ancestry cases, 6,946 European ancestry controls, 3,064 European ancestry trios from 2,828 families	6p21.32	6	32636595	HLA	HLA-DRB1 - LOC107986589	3123	107986589		46759	593	rs9272346-G	rs9272346	0	9272346	intron_variant	1	NR	6e-129	128.222				Affymetrix [up to 335565]	N
2009-06-01	19430480	Barrett JC	2009-05-10	Nat Genet	www.ncbi.nlm.nih.gov/pubmed/19430480	Genome-wide association study and meta-analysis find that over 40 loci affect risk of type 1 diabetes.	Type 1 diabetes	7,514 cases, 9,045 controls	4,267 cases, 4,670 controls, 4,342 trios from 2,319 families	6p21.32	6	32440750	MHC	HLA-DRA			3122			rs9268645-?	rs9268645	0	9268645	intron_variant	0	NR	1e-100	100				Affymetrix, Illumina [841622] (imputed)	N
2010-08-30	20045101	Ferreira MA	2009-12-31	Am J Hum Genet	www.ncbi.nlm.nih.gov/pubmed/20045101	Quantitative trait loci for CD4:CD8 lymphocyte ratio are associated with risk of type 1 diabetes and HIV-1 immune control.	CD4:CD8 lymphocyte ratio	2,538 European ancestry twins from 1,089 families	988 individuals from 550 families	6p21.33	6	31284619	HLA-B	RPL3P2 - WASF5P	116935	387122		3048	2882	rs2524054-A	rs2524054	0	2524054	intron_variant	1	0.32	2e-28	27.699	(CD4:CD8)	0.37	[0.31-0.43] SD increase	Illumina [529721]	N
2016-02-04	25936594	Tomer Y	2015-04-27	J Autoimmun	www.ncbi.nlm.nih.gov/pubmed/25936594	Genome wide identification of new genes and pathways in patients with both autoimmune thyroiditis and type 1 diabetes.	Type 1 diabetes and autoimmune thyroid diseases	346 European ancestry cases, 727 European ancestry controls	185 European ancestry cases, 340 European ancestry controls	6p21.33	6	31951083	BAT2, HSPA1L, CFB, TNXB, NOTCH4	CFB			629			rs1270942-C	rs1270942	0	1270942	non_coding_transcript_exon_variant	0	NR	5e-25	24.301		3.0494		Illumina [514008]	N
2016-02-04	25936594	Tomer Y	2015-04-27	J Autoimmun	www.ncbi.nlm.nih.gov/pubmed/25936594	Genome wide identification of new genes and pathways in patients with both autoimmune thyroiditis and type 1 diabetes.	Type 1 diabetes and autoimmune thyroid diseases	346 European ancestry cases, 727 European ancestry controls	185 European ancestry cases, 340 European ancestry controls	6p21.33	6	31600692	NFKBIL1, LTA, NCR3	NCR3 - UQCRHP1	259197	100130756		7668	10391	rs2857595-T	rs2857595	0	2857595	intergenic_variant	1	NR	2e-23	22.699		2.3765		Illumina [514008]	N
2016-02-04	25936594	Tomer Y	2015-04-27	J Autoimmun	www.ncbi.nlm.nih.gov/pubmed/25936594	Genome wide identification of new genes and pathways in patients with both autoimmune thyroiditis and type 1 diabetes.	Type 1 diabetes and autoimmune thyroid diseases	346 European ancestry cases, 727 European ancestry controls	185 European ancestry cases, 340 European ancestry controls	6p21.33	6	31396930	PSORS1C1, MICA, HCP5	LOC101929072			101929072			rs2251396-T	rs2251396	0	2251396	upstream_gene_variant	0	NR	1e-22	22		2.2132		Illumina [514008]	N
2016-02-04	25936594	Tomer Y	2015-04-27	J Autoimmun	www.ncbi.nlm.nih.gov/pubmed/25936594	Genome wide identification of new genes and pathways in patients with both autoimmune thyroiditis and type 1 diabetes.	Type 1 diabetes and autoimmune thyroid diseases	346 European ancestry cases, 727 European ancestry controls	185 European ancestry cases, 340 European ancestry controls	6p21.32	6	32830954	TAP2	TAP2			6891			rs1015166-T	rs1015166	0	1015166	intron_variant	0	NR	4e-22	21.3979		2.1428		Illumina [514008]	N
2010-08-30	20045101	Ferreira MA	2009-12-31	Am J Hum Genet	www.ncbi.nlm.nih.gov/pubmed/20045101	Quantitative trait loci for CD4:CD8 lymphocyte ratio are associated with risk of type 1 diabetes and HIV-1 immune control.	CD4:CD8 lymphocyte ratio	2,538 European ancestry twins from 1,089 families	988 individuals from 550 families	6p21.33	6	31284619	HLA-B	RPL3P2 - WASF5P	116935	387122		3048	2882	rs2524054-A	rs2524054	0	2524054	intron_variant	1	0.32	6e-21	20.2218	(CD8)	0.31	[0.25-0.37] SD decrease	Illumina [529721]	N
2016-02-04	25936594	Tomer Y	2015-04-27	J Autoimmun	www.ncbi.nlm.nih.gov/pubmed/25936594	Genome wide identification of new genes and pathways in patients with both autoimmune thyroiditis and type 1 diabetes.	Type 1 diabetes and autoimmune thyroid diseases	346 European ancestry cases, 727 European ancestry controls	185 European ancestry cases, 340 European ancestry controls	6p21.32	6	32395438	BTNL2	BTNL2, LOC101929163			56244, 101929163			rs1980493-G	rs1980493	0	1980493	intron_variant	0	NR	2e-20	19.699		2.5034		Illumina [514008]	N
2008-06-16	17632545	Hakonarson H	2007-07-15	Nature	www.ncbi.nlm.nih.gov/pubmed/17632545	A genome-wide association study identifies KIAA0350 as a type 1 diabetes gene.	Type 1 diabetes	467 European ancestry trios, 561 European ancestry cases, 1,143 European ancestry controls	390 European ancestry trios, 1,333 European ancestry cases from 549 families	6p21.32	6	32700133	HLA-DRB1	HLA-DQB1 - MTCO3P1	3119	404026		33444	6011	rs2647044-A	rs2647044	0	2647044	intergenic_variant	1	0.13	1e-16	16		8.3	[6.97-9.89]	Illumina [543071]	N
2016-02-04	25936594	Tomer Y	2015-04-27	J Autoimmun	www.ncbi.nlm.nih.gov/pubmed/25936594	Genome wide identification of new genes and pathways in patients with both autoimmune thyroiditis and type 1 diabetes.	Type 1 diabetes and autoimmune thyroid diseases	346 European ancestry cases, 727 European ancestry controls	185 European ancestry cases, 340 European ancestry controls	6p21.33	6	30814225	IER3, DDR1	LINC00243			401247			rs886424-A	rs886424	0	886424	non_coding_transcript_exon_variant	0	NR	3e-14	13.5229		2.2107		Illumina [514008]	N
2009-06-01	19430480	Barrett JC	2009-05-10	Nat Genet	www.ncbi.nlm.nih.gov/pubmed/19430480	Genome-wide association study and meta-analysis find that over 40 loci affect risk of type 1 diabetes.	Type 1 diabetes	7,514 cases, 9,045 controls	4,267 cases, 4,670 controls, 4,342 trios from 2,319 families	6q22.32	6	126377573	C6orf173	CENPW			387103			rs9388489-G	rs9388489	0	9388489	intergenic_variant	0	0.45	4e-13	12.3979		1.17	[1.10-1.24]	Affymetrix, Illumina [841622] (imputed)	N
2008-11-26	18978792	Cooper JD	2008-11-02	Nat Genet	www.ncbi.nlm.nih.gov/pubmed/18978792	Meta-analysis of genome-wide association study data identifies additional type 1 diabetes risk loci.	Type 1 diabetes	3,561 European ancestry cases, 4,646 European ancestry controls	6,225 European ancestry cases, 6,946 European ancestry controls, 3,064 European ancestry trios from 2,828 families	6q15	6	90248512	BACH2	BACH2			60468			rs11755527-G	rs11755527	0	11755527	intron_variant	0	0.47	5e-12	11.301		1.13	[1.08-1.19]	Affymetrix [up to 335565]	N
2011-10-26	21980299	Bradfield JP	2011-09-29	PLoS Genet	www.ncbi.nlm.nih.gov/pubmed/21980299	A genome-wide meta-analysis of six type 1 diabetes cohorts identifies multiple associated loci.	Type 1 diabetes	9,934 European ancestry cases, 16,956 European ancestry controls	1,120 European ancestry affected trios	6q27	6	170063801	WDR27, C6orf120, PHF10, TCTE3, C6orf208, LOC154449, DLL1, FAM120B, PSMB1, TBP, PCD2	LOC105378150 - LOC101929614	105378150	101929614		28405	82670	rs924043-?	rs924043	0	924043	intergenic_variant	1	0.85	8e-09	8.09691		1.35	[NR]	Affymetrix, Illumina [~ 2540000] (imputed)	N
2016-02-04	25936594	Tomer Y	2015-04-27	J Autoimmun	www.ncbi.nlm.nih.gov/pubmed/25936594	Genome wide identification of new genes and pathways in patients with both autoimmune thyroiditis and type 1 diabetes.	Type 1 diabetes and autoimmune thyroid diseases	346 European ancestry cases, 727 European ancestry controls	185 European ancestry cases, 340 European ancestry controls	6p22.1	6	30110498	TRIM31	TRIM31, TRIM31-AS1			11074, 104533120			rs2523989-A	rs2523989	0	2523989	missense_variant	0	NR	2e-08	7.69897		1.7499		Illumina [514008]	N
2017-09-14	28672053	Meng W	2017-07-03	Br J Dermatol	www.ncbi.nlm.nih.gov/pubmed/28672053	A genome-wide association study suggested that the mitogen-activated protein kinase 14 gene (MAPK14) is associated with diabetic foot ulcer.	Foot ulcer in diabetes and neuropathy	662 European ancestry type 2 diabetes cases, 37 European ancestry type 1 diabetes cases, 2,584 European ancestry type 2 diabetes controls, 111 European ancestry type 1 diabetes controls	NA	6p21.31	6	36030611	MAPK14	MAPK14			1432			rs80028505-T	rs80028505	0	80028505	intron_variant	0	0.09	3e-08	7.52288		1.71	[1.41-2.06]	Affymetrix, Illumina [6706850] (imputed)	N
2011-09-21	21829393	Plagnol V	2011-08-04	PLoS Genet	www.ncbi.nlm.nih.gov/pubmed/21829393	Genome-wide association analysis of autoantibody positivity in type 1 diabetes cases.	Type 1 diabetes	8,506 European ancestry cases, up to 10,596 European ancestry controls	NA	6q15	6	90248512	BACH2	BACH2			60468			rs11755527-G	rs11755527	0	11755527	intron_variant	0	NR	3e-08	7.52288		1.1	[NR]	Affymetrix, Illumina [NR]	N
2009-06-01	19430480	Barrett JC	2009-05-10	Nat Genet	www.ncbi.nlm.nih.gov/pubmed/19430480	Genome-wide association study and meta-analysis find that over 40 loci affect risk of type 1 diabetes.	Type 1 diabetes	7,514 cases, 9,045 controls	4,267 cases, 4,670 controls, 4,342 trios from 2,319 families	6q15	6	90248512	BACH2	BACH2			60468			rs11755527-?	rs11755527	0	11755527	intron_variant	0	NR	5e-08	7.30103				Affymetrix, Illumina [841622] (imputed)	N
2017-09-14	28672053	Meng W	2017-07-03	Br J Dermatol	www.ncbi.nlm.nih.gov/pubmed/28672053	A genome-wide association study suggested that the mitogen-activated protein kinase 14 gene (MAPK14) is associated with diabetic foot ulcer.	Foot ulcer in diabetes and neuropathy	662 European ancestry type 2 diabetes cases, 37 European ancestry type 1 diabetes cases, 2,584 European ancestry type 2 diabetes controls, 111 European ancestry type 1 diabetes controls	NA	6p21.31	6	36026129	MAPK14	SLC26A8 - MAPK14	116369	1432		1274	1506	rs3761980-C	rs3761980	0	3761980	upstream_gene_variant	1	NR	9e-08	7.04576	(Type 2 diabetes)			Affymetrix, Illumina [6706850] (imputed)	N
2017-09-14	28672053	Meng W	2017-07-03	Br J Dermatol	www.ncbi.nlm.nih.gov/pubmed/28672053	A genome-wide association study suggested that the mitogen-activated protein kinase 14 gene (MAPK14) is associated with diabetic foot ulcer.	Foot ulcer and neuropathy in diabetes	662 European ancestry type 2 diabetes and neuropathy cases, 37 European ancestry type 1 diabetes and neuropathy cases, 4,250 European ancestry type 1 and type 2 diabetes controls	NA	6q22.31	6	123540174	NR	TRDN, LOC105377982			10345, 105377982			rs11154178-?	rs11154178	0	11154178	intron_variant	0	NR	2e-07	6.69897		1.37	[1.22-1.55]	Affymetrix, Illumina [6706850] (imputed)	N
2008-11-11	18840781	Grant SF	2008-10-07	Diabetes	www.ncbi.nlm.nih.gov/pubmed/18840781	Follow-up analysis of genome-wide association data identifies novel loci for type 1 diabetes.	Type 1 diabetes	563 European ancestry cases, 1,146 European ancestry controls, 483 European ancestry trios	3,303 European ancestry cases, 4,673 European ancestry controls	6q15	6	90247744	BACH2	BACH2			60468			rs3757247-A	rs3757247	0	3757247	intron_variant	0	NR	1e-06	6		1.13	[1.08-1.19]	Illumina [up to 1000000]	N
2017-07-24	21829393	Plagnol V	2011-08-04	PLoS Genet	www.ncbi.nlm.nih.gov/pubmed/21829393	Genome-wide association analysis of autoantibody positivity in type 1 diabetes cases.	Thyroid peroxidase autoantibody levels in type 1 diabetes	8,300 European ancestry cases	NA	6q15	6	90248512	BACH2	BACH2			60468			rs11755527-G	rs11755527	0	11755527	intron_variant	0		1e-06	6		1.2		Affymetrix, Illumina [NR]	N
2015-05-21	22704111	Hotaling JM	2012-06-13	J Urol	www.ncbi.nlm.nih.gov/pubmed/22704111	Pilot genome-wide association search identifies potential loci for risk of erectile dysfunction in type 1 diabetes using the DCCT/EDIC study cohort.	Erectile dysfunction in type 1 diabetes	125 European ancestry cases, 403 European ancestry controls	NA	6q24.2	6	143758717	PHACTR2	PHACTR2			9749			rs6931865-A	rs6931865	0	6931865	intron_variant	0	0.336	4e-06	5.39794				Illumina [840354]	N
2017-03-31	27647854	Sandholm N	2016-09-19	J Am Soc Nephrol	www.ncbi.nlm.nih.gov/pubmed/27647854	The Genetic Landscape of Renal Complications in Type 1 Diabetes.	Chronic kidney disease (chronic kidney disease vs normal or mildly reduced eGFR) in type 1 diabetes	1,142 European ancestry cases, 113 cases, 2,442 European ancestry controls, 467 controls	2,046 cases, 4,549 controls	6p24.3	6	8226764	NR	LOC105374910			105374910			rs13217044-A	rs13217044	0	13217044	intergenic_variant	0	0.71	4e-06	5.39794		1.15	[1.07-1.23]	Illumina [NR] (imputed)	N
2009-06-01	19430480	Barrett JC	2009-05-10	Nat Genet	www.ncbi.nlm.nih.gov/pubmed/19430480	Genome-wide association study and meta-analysis find that over 40 loci affect risk of type 1 diabetes.	Type 1 diabetes	7,514 cases, 9,045 controls	4,267 cases, 4,670 controls, 4,342 trios from 2,319 families	7p15.2	7	26852046	intergenic	SKAP2			8935			rs7804356-?	rs7804356	0	7804356	intron_variant	0	0.76	5e-09	8.30103		1.14	[1.06-1.22]	Affymetrix, Illumina [841622] (imputed)	N
2009-06-01	19430480	Barrett JC	2009-05-10	Nat Genet	www.ncbi.nlm.nih.gov/pubmed/19430480	Genome-wide association study and meta-analysis find that over 40 loci affect risk of type 1 diabetes.	Type 1 diabetes	7,514 cases, 9,045 controls	4,267 cases, 4,670 controls, 4,342 trios from 2,319 families	7p12.1	7	50959497	COBL	RPL39P23 - COBL	100271203	23242		115715	56715	rs4948088-?	rs4948088	0	4948088	intron_variant	1	0.95	4e-08	7.39794		1.3	[1.11-1.49]	Affymetrix, Illumina [841622] (imputed)	N
2011-10-26	21980299	Bradfield JP	2011-09-29	PLoS Genet	www.ncbi.nlm.nih.gov/pubmed/21980299	A genome-wide meta-analysis of six type 1 diabetes cohorts identifies multiple associated loci.	Type 1 diabetes	9,934 European ancestry cases, 16,956 European ancestry controls	1,120 European ancestry affected trios	7p15.1	7	28189423	LOC100128081	JAZF1-AS1			100128081			rs550448-?	rs550448	0	550448	intron_variant	0	0.86	5e-07	6.30103		1.32	[NR]	Affymetrix, Illumina [~ 2540000] (imputed)	N
2017-03-31	27647854	Sandholm N	2016-09-19	J Am Soc Nephrol	www.ncbi.nlm.nih.gov/pubmed/27647854	The Genetic Landscape of Renal Complications in Type 1 Diabetes.	Chronic kidney disease (severe chronic kidney disease vs normal kidney function) in type 1 diabetes	907 European ancestry cases, 210 cases, 1,661 European ancestry controls, 357 controls	1,266 cases, 2,655 controls	7q36.1	7	148443990	CNTNAP2	RN7SL72P - LOC392145	106480941	392145		5413	1820	rs1989248-C	rs1989248	0	1989248	intron_variant	1	0.29	6e-07	6.22185		1.26	[1.15-1.38]	Illumina [NR] (imputed)	N
2011-10-26	21980299	Bradfield JP	2011-09-29	PLoS Genet	www.ncbi.nlm.nih.gov/pubmed/21980299	A genome-wide meta-analysis of six type 1 diabetes cohorts identifies multiple associated loci.	Type 1 diabetes	9,934 European ancestry cases, 16,956 European ancestry controls	1,120 European ancestry affected trios	8q24.12	8	118965098	TNFRSF11B	COLEC10			10584			rs12679857-?	rs12679857	0	12679857	intergenic_variant	0	0.69	4e-07	6.39794		1.2	[NR]	Affymetrix, Illumina [~ 2540000] (imputed)	N
2017-09-14	28672053	Meng W	2017-07-03	Br J Dermatol	www.ncbi.nlm.nih.gov/pubmed/28672053	A genome-wide association study suggested that the mitogen-activated protein kinase 14 gene (MAPK14) is associated with diabetic foot ulcer.	Foot ulcer and neuropathy in diabetes	662 European ancestry type 2 diabetes and neuropathy cases, 37 European ancestry type 1 diabetes and neuropathy cases, 4,250 European ancestry type 1 and type 2 diabetes controls	NA	8p12	8	35265058	NR	UNC5D			137970			rs28485846-?	rs28485846	0	28485846	intron_variant	0	NR	4e-07	6.39794		2.116	[1.583-2.829]	Affymetrix, Illumina [6706850] (imputed)	N
2016-08-31	26301688	Li YR	2015-08-24	Nat Med	www.ncbi.nlm.nih.gov/pubmed/26301688	Meta-analysis of shared genetic architecture across ten pediatric autoimmune diseases.	Pediatric autoimmune diseases	97 European ancestry thyroiditis cases, 107 European ancestry ankylosing spondylitis cases, 100 European ancestry psoriasis cases, 173 European ancestry celiac disease cases, 254 European ancestry systemic lupus erythematosus cases, 308 European ancestry common variable inmunodeficiency cases, 865 European ancestry ulcerative colitis cases, 1,086 European ancestry Type 1 diabetes cases, 1,123 Eur…	NA	8q24.23	8	137124061	intergenic	RNU6-144P - LOC107986905	106481222	107986905		18604	14792	rs7831697-G	rs7831697	0	7831697	intergenic_variant	1	0.25	5e-07	6.30103				Illumina [7347414] (imputed)	N
2012-12-11	23028342	Sandholm N	2012-09-20	PLoS Genet	www.ncbi.nlm.nih.gov/pubmed/23028342	New susceptibility loci associated with kidney disease in type 1 diabetes.	Type 1 diabetes nephropathy	Up to 2,916 European ancestry Type 1 Diabetes cases with nephropathy, 3,315 European ancestry Type 1 Diabetes cases without nephropathy	Up to 1,493 European ancestry Type 1 Diabetes cases with nephropathy, 3,191 European ancestry Type 1 Diabetes cases without nephropathy	8q24.13	8	122693916	RP11-973F15.1	LINC01151			104266958			rs4871297-A	rs4871297	0	4871297	non_coding_transcript_exon_variant	0	0.52	2e-06	5.69897	(ESRD)	1.23	[1.14-1.35]	Affymetrix, Illumina [~ 2500000] (imputed)	N
2014-11-01	24595857	Sandholm N	2014-03-05	Diabetologia	www.ncbi.nlm.nih.gov/pubmed/24595857	Genome-wide association study of urinary albumin excretion rate in patients with type 1 diabetes.	Urinary albumin excretion rate in type 1 diabetes	1,925 European ancestry cases	3,750 European ancestry cases	8p22	8	19065067	SH2D4A, PSD3	PSD3			23362			rs2410601-G	rs2410601	0	2410601	intron_variant	0	0.47	4e-06	5.39794		0.08	[0.04-0.11] unit increase	Illumina [2400000] (imputed)	N
2009-09-28	19729612	Paterson AD	2009-09-03	Arterioscler Thromb Vasc Biol	www.ncbi.nlm.nih.gov/pubmed/19729612	Genome-wide association identifies the ABO blood group as a major locus associated with serum levels of soluble E-selectin.	Soluble E-selectin levels	685 European ancestry individuals with type 1 diabetes	477 European ancestry individuals	9q34.2	9	133278724	ABO	ABO - LCN1P2	28	653163		3510	38781	rs579459-C	rs579459	0	579459	upstream_gene_variant	1	0.2	1e-29	29				Illumina [~ 841000]	N
2009-06-01	19430480	Barrett JC	2009-05-10	Nat Genet	www.ncbi.nlm.nih.gov/pubmed/19430480	Genome-wide association study and meta-analysis find that over 40 loci affect risk of type 1 diabetes.	Type 1 diabetes	7,514 cases, 9,045 controls	4,267 cases, 4,670 controls, 4,342 trios from 2,319 families	9p24.2	9	4291747	GLIS3	GLIS3			169792			rs7020673-?	rs7020673	0	7020673	intron_variant	0	0.5	5e-12	11.301		1.14	[1.08-1.20]	Affymetrix, Illumina [841622] (imputed)	N
2016-08-31	26301688	Li YR	2015-08-24	Nat Med	www.ncbi.nlm.nih.gov/pubmed/26301688	Meta-analysis of shared genetic architecture across ten pediatric autoimmune diseases.	Pediatric autoimmune diseases	97 European ancestry thyroiditis cases, 107 European ancestry ankylosing spondylitis cases, 100 European ancestry psoriasis cases, 173 European ancestry celiac disease cases, 254 European ancestry systemic lupus erythematosus cases, 308 European ancestry common variable inmunodeficiency cases, 865 European ancestry ulcerative colitis cases, 1,086 European ancestry Type 1 diabetes cases, 1,123 Eur…	NA	9q32	9	114790969	TNFSF15	TNFSF15			9966			rs4246905-T	rs4246905	0	4246905	missense_variant	0	0.28	1e-08	8				Illumina [7347414] (imputed)	N
2016-08-31	26301688	Li YR	2015-08-24	Nat Med	www.ncbi.nlm.nih.gov/pubmed/26301688	Meta-analysis of shared genetic architecture across ten pediatric autoimmune diseases.	Pediatric autoimmune diseases	97 European ancestry thyroiditis cases, 107 European ancestry ankylosing spondylitis cases, 100 European ancestry psoriasis cases, 173 European ancestry celiac disease cases, 254 European ancestry systemic lupus erythematosus cases, 308 European ancestry common variable inmunodeficiency cases, 865 European ancestry ulcerative colitis cases, 1,086 European ancestry Type 1 diabetes cases, 1,123 Eur…	NA	9q34.3	9	136369144	CARD9	CARD9			64170			rs11145763-C	rs11145763	0	11145763	intron_variant	0	0.4	3e-08	7.52288				Illumina [7347414] (imputed)	N
2016-08-31	26301688	Li YR	2015-08-24	Nat Med	www.ncbi.nlm.nih.gov/pubmed/26301688	Meta-analysis of shared genetic architecture across ten pediatric autoimmune diseases.	Pediatric autoimmune diseases	97 European ancestry thyroiditis cases, 107 European ancestry ankylosing spondylitis cases, 100 European ancestry psoriasis cases, 173 European ancestry celiac disease cases, 254 European ancestry systemic lupus erythematosus cases, 308 European ancestry common variable inmunodeficiency cases, 865 European ancestry ulcerative colitis cases, 1,086 European ancestry Type 1 diabetes cases, 1,123 Eur…	NA	9p24.1	9	4981866	JAK2	HNRNPA1P41 - JAK2	100128701	3717		35904	3220	rs36051895-T	rs36051895	0	36051895	upstream_gene_variant	1	0.29	9e-08	7.04576				Illumina [7347414] (imputed)	N
2016-08-31	26301688	Li YR	2015-08-24	Nat Med	www.ncbi.nlm.nih.gov/pubmed/26301688	Meta-analysis of shared genetic architecture across ten pediatric autoimmune diseases.	Pediatric autoimmune diseases	97 European ancestry thyroiditis cases, 107 European ancestry ankylosing spondylitis cases, 100 European ancestry psoriasis cases, 173 European ancestry celiac disease cases, 254 European ancestry systemic lupus erythematosus cases, 308 European ancestry common variable inmunodeficiency cases, 865 European ancestry ulcerative colitis cases, 1,086 European ancestry Type 1 diabetes cases, 1,123 Eur…	NA	9p23	9	12785074	LURAP1L	LURAP1L, LURAP1L-AS1			286343, 101929467			rs7042370-T	rs7042370	0	7042370	intron_variant	0	0.43	1e-07	7				Illumina [7347414] (imputed)	N
2016-08-31	26301688	Li YR	2015-08-24	Nat Med	www.ncbi.nlm.nih.gov/pubmed/26301688	Meta-analysis of shared genetic architecture across ten pediatric autoimmune diseases.	Pediatric autoimmune diseases	97 European ancestry thyroiditis cases, 107 European ancestry ankylosing spondylitis cases, 100 European ancestry psoriasis cases, 173 European ancestry celiac disease cases, 254 European ancestry systemic lupus erythematosus cases, 308 European ancestry common variable inmunodeficiency cases, 865 European ancestry ulcerative colitis cases, 1,086 European ancestry Type 1 diabetes cases, 1,123 Eur…	NA	9q34.11	9	129894985	FNBP1	FNBP1			23048			rs10988542-C	rs10988542	0	10988542	intron_variant	0	0.08	7e-07	6.1549				Illumina [7347414] (imputed)	N
2008-11-11	18840781	Grant SF	2008-10-07	Diabetes	www.ncbi.nlm.nih.gov/pubmed/18840781	Follow-up analysis of genome-wide association data identifies novel loci for type 1 diabetes.	Type 1 diabetes	563 European ancestry cases, 1,146 European ancestry controls, 483 European ancestry trios	3,303 European ancestry cases, 4,673 European ancestry controls	9p24.2	9	4292083	GLIS3	GLIS3			169792			rs10758593-A	rs10758593	0	10758593	intron_variant	0	NR	3e-06	5.52288		1.13	[1.07-1.19]	Illumina [up to 1000000]	N
2011-09-21	21829393	Plagnol V	2011-08-04	PLoS Genet	www.ncbi.nlm.nih.gov/pubmed/21829393	Genome-wide association analysis of autoantibody positivity in type 1 diabetes cases.	Type 1 diabetes	8,506 European ancestry cases, up to 10,596 European ancestry controls	NA	10p15.1	10	6055320	IL2RA	IL2RA			3559			rs12722495-A	rs12722495	0	12722495	intron_variant	0	NR	1e-38	38		1.61	[NR]	Affymetrix, Illumina [NR]	N
2009-06-01	19430480	Barrett JC	2009-05-10	Nat Genet	www.ncbi.nlm.nih.gov/pubmed/19430480	Genome-wide association study and meta-analysis find that over 40 loci affect risk of type 1 diabetes.	Type 1 diabetes	7,514 cases, 9,045 controls	4,267 cases, 4,670 controls, 4,342 trios from 2,319 families	10q23.31	10	88263276	C10orf59	RNLS, LOC101929727			55328, 101929727			rs10509540-?	rs10509540	0	10509540	upstream_gene_variant	0	0.71	1e-28	28		1.33	[1.25-1.43]	Affymetrix, Illumina [841622] (imputed)	N
2009-06-01	19430480	Barrett JC	2009-05-10	Nat Genet	www.ncbi.nlm.nih.gov/pubmed/19430480	Genome-wide association study and meta-analysis find that over 40 loci affect risk of type 1 diabetes.	Type 1 diabetes	7,514 cases, 9,045 controls	4,267 cases, 4,670 controls, 4,342 trios from 2,319 families	10p15.1	10	6081532	IL2RA	RPL32P23 - RBM17	644020	84991		9611	7454	rs12251307-?	rs12251307	0	12251307	intergenic_variant	1	NR	1e-13	13				Affymetrix, Illumina [841622] (imputed)	N
2016-08-31	26301688	Li YR	2015-08-24	Nat Med	www.ncbi.nlm.nih.gov/pubmed/26301688	Meta-analysis of shared genetic architecture across ten pediatric autoimmune diseases.	Pediatric autoimmune diseases	97 European ancestry thyroiditis cases, 107 European ancestry ankylosing spondylitis cases, 100 European ancestry psoriasis cases, 173 European ancestry celiac disease cases, 254 European ancestry systemic lupus erythematosus cases, 308 European ancestry common variable inmunodeficiency cases, 865 European ancestry ulcerative colitis cases, 1,086 European ancestry Type 1 diabetes cases, 1,123 Eur…	NA	10q21.2	10	62679011	ZNF365	ZNF365 - ALDH7A1P4	22891	544		7000	61979	rs10822050-C	rs10822050	0	10822050	intergenic_variant	1	0.39	8e-11	10.0969				Illumina [7347414] (imputed)	N
2016-08-31	26301688	Li YR	2015-08-24	Nat Med	www.ncbi.nlm.nih.gov/pubmed/26301688	Meta-analysis of shared genetic architecture across ten pediatric autoimmune diseases.	Pediatric autoimmune diseases	97 European ancestry thyroiditis cases, 107 European ancestry ankylosing spondylitis cases, 100 European ancestry psoriasis cases, 173 European ancestry celiac disease cases, 254 European ancestry systemic lupus erythematosus cases, 308 European ancestry common variable inmunodeficiency cases, 865 European ancestry ulcerative colitis cases, 1,086 European ancestry Type 1 diabetes cases, 1,123 Eur…	NA	10p11.21	10	37303610	ANKRD30A	RN7SL314P - LOC101929498	106481836	101929498		5921	1353	rs7100025-G	rs7100025	0	7100025	intron_variant	1	0.34	8e-11	10.0969				Illumina [7347414] (imputed)	N
2016-08-31	26301688	Li YR	2015-08-24	Nat Med	www.ncbi.nlm.nih.gov/pubmed/26301688	Meta-analysis of shared genetic architecture across ten pediatric autoimmune diseases.	Pediatric autoimmune diseases	97 European ancestry thyroiditis cases, 107 European ancestry ankylosing spondylitis cases, 100 European ancestry psoriasis cases, 173 European ancestry celiac disease cases, 254 European ancestry systemic lupus erythematosus cases, 308 European ancestry common variable inmunodeficiency cases, 865 European ancestry ulcerative colitis cases, 1,086 European ancestry Type 1 diabetes cases, 1,123 Eur…	NA	10q24.2	10	99538694	NKX2-3	NKX2-3 - SLC25A28	159296	81894		2170	71824	rs1332099-T	rs1332099	0	1332099	downstream_gene_variant	1	0.46	9e-11	10.0458				Illumina [7347414] (imputed)	N
2008-11-26	18978792	Cooper JD	2008-11-02	Nat Genet	www.ncbi.nlm.nih.gov/pubmed/18978792	Meta-analysis of genome-wide association study data identifies additional type 1 diabetes risk loci.	Type 1 diabetes	3,561 European ancestry cases, 4,646 European ancestry controls	6,225 European ancestry cases, 6,946 European ancestry controls, 3,064 European ancestry trios from 2,828 families	10p15.1	10	6348488	PRKCQ	LOC399716			399716			rs947474-G	rs947474	0	947474	upstream_gene_variant	0	0.19	4e-09	8.39794		1.1	[1.03-1.18]	Affymetrix [up to 335565]	N
2012-03-09	22293688	Huang J	2012-02-01	Eur J Hum Genet	www.ncbi.nlm.nih.gov/pubmed/22293688	1000 Genomes-based imputation identifies novel and refined associations for the Wellcome Trust Case Control Consortium phase 1 Data.	Type 1 diabetes	16,179 European ancestry individuals	NA	10p15.1	10	6052734	IL2RA	IL2RA			3559			rs61839660-?	rs61839660	0	61839660	intron_variant	0	NR	5e-09	8.30103		1.6	[1.44-1.76]	NR [6233112] (imputed)	N
2016-08-31	26301688	Li YR	2015-08-24	Nat Med	www.ncbi.nlm.nih.gov/pubmed/26301688	Meta-analysis of shared genetic architecture across ten pediatric autoimmune diseases.	Pediatric autoimmune diseases	97 European ancestry thyroiditis cases, 107 European ancestry ankylosing spondylitis cases, 100 European ancestry psoriasis cases, 173 European ancestry celiac disease cases, 254 European ancestry systemic lupus erythematosus cases, 308 European ancestry common variable inmunodeficiency cases, 865 European ancestry ulcerative colitis cases, 1,086 European ancestry Type 1 diabetes cases, 1,123 Eur…	NA	10p15.1	10	6056986	IL2RA	IL2RA			3559			rs706778-T	rs706778	0	706778	intron_variant	0	0.41	6e-09	8.22185				Illumina [7347414] (imputed)	N
2016-08-31	26301688	Li YR	2015-08-24	Nat Med	www.ncbi.nlm.nih.gov/pubmed/26301688	Meta-analysis of shared genetic architecture across ten pediatric autoimmune diseases.	Pediatric autoimmune diseases	97 European ancestry thyroiditis cases, 107 European ancestry ankylosing spondylitis cases, 100 European ancestry psoriasis cases, 173 European ancestry celiac disease cases, 254 European ancestry systemic lupus erythematosus cases, 308 European ancestry common variable inmunodeficiency cases, 865 European ancestry ulcerative colitis cases, 1,086 European ancestry Type 1 diabetes cases, 1,123 Eur…	NA	10q22.3	10	79287626	ZMIZ1	ZMIZ1			57178			rs1250563-C	rs1250563	0	1250563	intron_variant	0	0.29	1e-08	8				Illumina [7347414] (imputed)	N
2009-06-01	19430480	Barrett JC	2009-05-10	Nat Genet	www.ncbi.nlm.nih.gov/pubmed/19430480	Genome-wide association study and meta-analysis find that over 40 loci affect risk of type 1 diabetes.	Type 1 diabetes	7,514 cases, 9,045 controls	4,267 cases, 4,670 controls, 4,342 trios from 2,319 families	10p15.1	10	6430929	PRKCQ	PRKCQ			5588			rs11258747-?	rs11258747	0	11258747	missense_variant	0	NR	1e-07	7				Affymetrix, Illumina [841622] (imputed)	N
2015-07-24	25476525	Germain M	2014-12-06	Diabetologia	www.ncbi.nlm.nih.gov/pubmed/25476525	SORBS1 gene, a new candidate for diabetic nephropathy: results from a multi-stage genome-wide association study in patients with type 1 diabetes.	Diabetic nephropathy in type 1 diabetes	683 European ancestry cases, 779 European ancestry controls	2,962 European ancestry cases, 3,379 European ancestry controls	10q24.1	10	95524324	SORBS1	SORBS1			10580			rs1326934-T	rs1326934	0	1326934	intron_variant	0	0.57	6e-07	6.22185		1.19	[1.11-1.27]	Illumina [11133962] (imputed)	N
2011-10-26	21980299	Bradfield JP	2011-09-29	PLoS Genet	www.ncbi.nlm.nih.gov/pubmed/21980299	A genome-wide meta-analysis of six type 1 diabetes cohorts identifies multiple associated loci.	Type 1 diabetes	9,934 European ancestry cases, 16,956 European ancestry controls	1,120 European ancestry affected trios	10q24.2	10	98540425	NR	HPSE2			60495			rs10786436-T	rs10786436	0	10786436	intron_variant	0	NR	8e-07	6.09691		1.1	[NR]	Affymetrix, Illumina [~ 2540000] (imputed)	N
2008-11-26	18978792	Cooper JD	2008-11-02	Nat Genet	www.ncbi.nlm.nih.gov/pubmed/18978792	Meta-analysis of genome-wide association study data identifies additional type 1 diabetes risk loci.	Type 1 diabetes	3,561 European ancestry cases, 4,646 European ancestry controls	6,225 European ancestry cases, 6,946 European ancestry controls, 3,064 European ancestry trios from 2,828 families	10p15.1	10	6081532	IL2RA	RPL32P23 - RBM17	644020	84991		9611	7454	rs12251307-T	rs12251307	0	12251307	intergenic_variant	1	NR	2e-06	5.69897				Affymetrix [up to 335565]	N
2017-03-31	27647854	Sandholm N	2016-09-19	J Am Soc Nephrol	www.ncbi.nlm.nih.gov/pubmed/27647854	The Genetic Landscape of Renal Complications in Type 1 Diabetes.	Kidney disease (early and late stages) in type 1 diabetes	2,068 European ancestry cases, 495 cases, 1,903 European ancestry controls, 690 controls	68 European ancestry cases, 3,188 cases, 815 European ancestry controls, 3,907 controls	10q23.1	10	81531934	NRG3	RPA2P2 - LOC105378389	389990	105378389		394611	306850	rs72809865-T	rs72809865	0	72809865	intergenic_variant	1	0.16	7e-06	5.1549		1.17	[1.09-1.26]	Illumina [NR] (imputed)	N
2011-09-21	21829393	Plagnol V	2011-08-04	PLoS Genet	www.ncbi.nlm.nih.gov/pubmed/21829393	Genome-wide association analysis of autoantibody positivity in type 1 diabetes cases.	Type 1 diabetes	8,506 European ancestry cases, up to 10,596 European ancestry controls	NA	11p15.5	11	2160994	INS	INS-IGF2, INS			723961, 3630			rs689-A	rs689	0	689	splice_region_variant	0	NR	5e-196	195.301				Affymetrix, Illumina [NR]	N
2009-06-01	19430480	Barrett JC	2009-05-10	Nat Genet	www.ncbi.nlm.nih.gov/pubmed/19430480	Genome-wide association study and meta-analysis find that over 40 loci affect risk of type 1 diabetes.	Type 1 diabetes	7,514 cases, 9,045 controls	4,267 cases, 4,670 controls, 4,342 trios from 2,319 families	11p15.5	11	2191936	INS	TH - ASCL2	7054	430		17855	76562	rs7111341-?	rs7111341	0	7111341	intergenic_variant	1	NR	4e-48	47.3979				Affymetrix, Illumina [841622] (imputed)	N
2011-09-21	21829393	Plagnol V	2011-08-04	PLoS Genet	www.ncbi.nlm.nih.gov/pubmed/21829393	Genome-wide association analysis of autoantibody positivity in type 1 diabetes cases.	Type 1 diabetes	8,506 European ancestry cases, up to 10,596 European ancestry controls	NA	11p15.5	11	2148913	IGF2AS	INS-IGF2, IGF2			723961, 3481			rs1004446-G	rs1004446	0	1004446	intron_variant	0	NR	3e-23	22.5229		1.4	[NR]	Affymetrix, Illumina [NR]	N
2016-08-31	26301688	Li YR	2015-08-24	Nat Med	www.ncbi.nlm.nih.gov/pubmed/26301688	Meta-analysis of shared genetic architecture across ten pediatric autoimmune diseases.	Pediatric autoimmune diseases	97 European ancestry thyroiditis cases, 107 European ancestry ankylosing spondylitis cases, 100 European ancestry psoriasis cases, 173 European ancestry celiac disease cases, 254 European ancestry systemic lupus erythematosus cases, 308 European ancestry common variable inmunodeficiency cases, 865 European ancestry ulcerative colitis cases, 1,086 European ancestry Type 1 diabetes cases, 1,123 Eur…	NA	11p15.5	11	2146620	INS	IGF2-AS, IGF2, INS-IGF2			51214, 3481, 723961			rs17885785-T	rs17885785	0	17885785	non_coding_transcript_exon_variant	0	0.2	8e-11	10.0969				Illumina [7347414] (imputed)	N
2008-06-16	17632545	Hakonarson H	2007-07-15	Nature	www.ncbi.nlm.nih.gov/pubmed/17632545	A genome-wide association study identifies KIAA0350 as a type 1 diabetes gene.	Type 1 diabetes	467 European ancestry trios, 561 European ancestry cases, 1,143 European ancestry controls	390 European ancestry trios, 1,333 European ancestry cases from 549 families	11p15.5	11	2148913	INS	INS-IGF2, IGF2			723961, 3481			rs1004446-C	rs1004446	0	1004446	intron_variant	0	0.65	4e-09	8.39794		1.61	[1.37-1.89]	Illumina [543071]	N
2008-06-16	17554260	Todd JA	2007-06-06	Nat Genet	www.ncbi.nlm.nih.gov/pubmed/17554260	Robust associations of four new chromosome regions from genome-wide analyses of type 1 diabetes.	Type 1 diabetes	2,000 European ancestry cases, 3,000 European ancestry controls	2,997 European ancestry trios, 4,000 European ancestry cases, 5,000 European ancestry controls	11p15.5	11	2148544	INS	IGF2-AS, INS-IGF2, IGF2			51214, 723961, 3481			rs3741208-T	rs3741208	0	3741208	non_coding_transcript_exon_variant	0	0.38	2e-07	6.69897		1.25	[1.15-1.35]	Affymetrix [NR]	N
2011-10-26	21980299	Bradfield JP	2011-09-29	PLoS Genet	www.ncbi.nlm.nih.gov/pubmed/21980299	A genome-wide meta-analysis of six type 1 diabetes cohorts identifies multiple associated loci.	Type 1 diabetes	9,934 European ancestry cases, 16,956 European ancestry controls	1,120 European ancestry affected trios	11q13.3	11	69781755	NR	FGF4 - FGF3	2249	2248		6352	28213	rs4084127-?	rs4084127	0	4084127	intergenic_variant	1	NR	3e-06	5.52288		1.11	[NR]	Affymetrix, Illumina [~ 2540000] (imputed)	N
2009-06-01	19430480	Barrett JC	2009-05-10	Nat Genet	www.ncbi.nlm.nih.gov/pubmed/19430480	Genome-wide association study and meta-analysis find that over 40 loci affect risk of type 1 diabetes.	Type 1 diabetes	7,514 cases, 9,045 controls	4,267 cases, 4,670 controls, 4,342 trios from 2,319 families	12q24.12	12	111446804	SH2B3	SH2B3			10019			rs3184504-?	rs3184504	0	3184504	missense_variant	0	NR	3e-27	26.5229				Affymetrix, Illumina [841622] (imputed)	N
2011-09-21	21829393	Plagnol V	2011-08-04	PLoS Genet	www.ncbi.nlm.nih.gov/pubmed/21829393	Genome-wide association analysis of autoantibody positivity in type 1 diabetes cases.	Type 1 diabetes	8,506 European ancestry cases, up to 10,596 European ancestry controls	NA	12q13.2	12	56088396	ERBB3	ERBB3			2065			rs2292239-T	rs2292239	0	2292239	intron_variant	0	NR	3e-27	26.5229		1.3	[NR]	Affymetrix, Illumina [NR]	N
2009-06-01	19430480	Barrett JC	2009-05-10	Nat Genet	www.ncbi.nlm.nih.gov/pubmed/19430480	Genome-wide association study and meta-analysis find that over 40 loci affect risk of type 1 diabetes.	Type 1 diabetes	7,514 cases, 9,045 controls	4,267 cases, 4,670 controls, 4,342 trios from 2,319 families	12q13.2	12	56088396	ERBB3	ERBB3			2065			rs2292239-?	rs2292239	0	2292239	intron_variant	0	NR	2e-25	24.699				Affymetrix, Illumina [841622] (imputed)	N
2008-06-16	17554260	Todd JA	2007-06-06	Nat Genet	www.ncbi.nlm.nih.gov/pubmed/17554260	Robust associations of four new chromosome regions from genome-wide analyses of type 1 diabetes.	Type 1 diabetes	2,000 European ancestry cases, 3,000 European ancestry controls	2,997 European ancestry trios, 4,000 European ancestry cases, 5,000 European ancestry controls	12q13.2	12	56088396	ERBB3	ERBB3			2065			rs2292239-A	rs2292239	0	2292239	intron_variant	0	0.34	2e-20	19.699		1.28	[1.21-1.35]	Affymetrix [NR]	N
2011-09-21	21829393	Plagnol V	2011-08-04	PLoS Genet	www.ncbi.nlm.nih.gov/pubmed/21829393	Genome-wide association analysis of autoantibody positivity in type 1 diabetes cases.	Type 1 diabetes	8,506 European ancestry cases, up to 10,596 European ancestry controls	NA	12q13.2	12	56018703	IKZF4	IKZF4, LOC105369781			64375, 105369781			rs1701704-T	rs1701704	0	1701704	intron_variant	0	NR	5e-18	17.301		1.25	[NR]	Affymetrix, Illumina [NR]	N
2008-11-26	18978792	Cooper JD	2008-11-02	Nat Genet	www.ncbi.nlm.nih.gov/pubmed/18978792	Meta-analysis of genome-wide association study data identifies additional type 1 diabetes risk loci.	Type 1 diabetes	3,561 European ancestry cases, 4,646 European ancestry controls	6,225 European ancestry cases, 6,946 European ancestry controls, 3,064 European ancestry trios from 2,828 families	12q24.13	12	112049014	C12orf30	NAA25			80018			rs17696736-G	rs17696736	0	17696736	intron_variant	0	NR	6e-18	17.2218				Affymetrix [up to 335565]	N
2012-03-09	22293688	Huang J	2012-02-01	Eur J Hum Genet	www.ncbi.nlm.nih.gov/pubmed/22293688	1000 Genomes-based imputation identifies novel and refined associations for the Wellcome Trust Case Control Consortium phase 1 Data.	Type 1 diabetes	16,179 European ancestry individuals	NA	12q24.11	12	111270654	CUX2	CUX2			23316			rs1265564-?	rs1265564	0	1265564	non_coding_transcript_exon_variant	0	NR	1e-16	16		1.45	[1.28-1.67]	NR [6233112] (imputed)	N
2008-06-16	17554260	Todd JA	2007-06-06	Nat Genet	www.ncbi.nlm.nih.gov/pubmed/17554260	Robust associations of four new chromosome regions from genome-wide analyses of type 1 diabetes.	Type 1 diabetes	2,000 European ancestry cases, 3,000 European ancestry controls	2,997 European ancestry trios, 4,000 European ancestry cases, 5,000 European ancestry controls	12q24.13	12	112049014	C12orf30	NAA25			80018			rs17696736-G	rs17696736	0	17696736	intron_variant	0	0.42	2e-16	15.699		1.22	[1.15-1.28]	Affymetrix [NR]	N
2008-11-26	18978792	Cooper JD	2008-11-02	Nat Genet	www.ncbi.nlm.nih.gov/pubmed/18978792	Meta-analysis of genome-wide association study data identifies additional type 1 diabetes risk loci.	Type 1 diabetes	3,561 European ancestry cases, 4,646 European ancestry controls	6,225 European ancestry cases, 6,946 European ancestry controls, 3,064 European ancestry trios from 2,828 families	12q13.2	12	56088396	ERBB3	ERBB3			2065			rs2292239-A	rs2292239	0	2292239	intron_variant	0	NR	3e-16	15.5229				Affymetrix [up to 335565]	N
2008-06-16	17554300	WTCCC	2007-06-07	Nature	www.ncbi.nlm.nih.gov/pubmed/17554300	Genome-wide association study of 14,000 cases of seven common diseases and 3,000 shared controls.	Type 1 diabetes	1,963 European ancestry cases, 2,938 European ancestry controls	(see Todd 2007)	12q24.13	12	112049014	SH2B3, TRAFD1, PTPN11, LNK	NAA25			80018			rs17696736-G	rs17696736	0	17696736	intron_variant	0	0.42	2e-14	13.699		1.34	[1.16-1.53]	Affymetrix [469557]	N
2008-06-16	17554300	WTCCC	2007-06-07	Nature	www.ncbi.nlm.nih.gov/pubmed/17554300	Genome-wide association study of 14,000 cases of seven common diseases and 3,000 shared controls.	Type 1 diabetes	1,963 European ancestry cases, 2,938 European ancestry controls	(see Todd 2007)	12q13.2	12	56076841	ERBB3	RPS26 - ERBB3	6231	2065		32618	3184	rs11171739-C	rs11171739	0	11171739	upstream_gene_variant	1	0.42	1e-11	11		1.34	[1.17-1.54]	Affymetrix [469557]	N
2009-06-01	19430480	Barrett JC	2009-05-10	Nat Genet	www.ncbi.nlm.nih.gov/pubmed/19430480	Genome-wide association study and meta-analysis find that over 40 loci affect risk of type 1 diabetes.	Type 1 diabetes	7,514 cases, 9,045 controls	4,267 cases, 4,670 controls, 4,342 trios from 2,319 families	12p13.31	12	9757568	CD69	CD69			969			rs4763879-A	rs4763879	0	4763879	intron_variant	0	0.37	2e-11	10.699		1.09	[1.02-1.16]	Affymetrix, Illumina [841622] (imputed)	N
2016-08-31	26301688	Li YR	2015-08-24	Nat Med	www.ncbi.nlm.nih.gov/pubmed/26301688	Meta-analysis of shared genetic architecture across ten pediatric autoimmune diseases.	Pediatric autoimmune diseases	97 European ancestry thyroiditis cases, 107 European ancestry ankylosing spondylitis cases, 100 European ancestry psoriasis cases, 173 European ancestry celiac disease cases, 254 European ancestry systemic lupus erythematosus cases, 308 European ancestry common variable inmunodeficiency cases, 865 European ancestry ulcerative colitis cases, 1,086 European ancestry Type 1 diabetes cases, 1,123 Eur…	NA	12q12	12	40366829	LRRK2	LOC105369736, LRRK2			105369736, 120892			rs17466626-G	rs17466626	0	17466626	non_coding_transcript_exon_variant	0	0.02	3e-10	9.52288				Illumina [7347414] (imputed)	N
2008-06-16	18198356	Hakonarson H	2008-01-15	Diabetes	www.ncbi.nlm.nih.gov/pubmed/18198356	A novel susceptibility locus for type 1 diabetes on Chr12q13 identified by a genome-wide association study.	Type 1 diabetes	467 European ancestry trios, 561 European ancestry cases, 1,143 European ancestry controls	946 European ancestry cases and 1,098 European ancestry controls from 549 families, 364 European ancestry trios	12q13.2	12	56018703	CDK2, RAB5B, SUOX, IKZF4, ERBB3	IKZF4, LOC105369781			64375, 105369781			rs1701704-C	rs1701704	0	1701704	intron_variant	0	0.35	9e-10	9.04576		1.25	[1.12-1.40]	Illumina [543071]	N
2016-08-31	26301688	Li YR	2015-08-24	Nat Med	www.ncbi.nlm.nih.gov/pubmed/26301688	Meta-analysis of shared genetic architecture across ten pediatric autoimmune diseases.	Pediatric autoimmune diseases	97 European ancestry thyroiditis cases, 107 European ancestry ankylosing spondylitis cases, 100 European ancestry psoriasis cases, 173 European ancestry celiac disease cases, 254 European ancestry systemic lupus erythematosus cases, 308 European ancestry common variable inmunodeficiency cases, 865 European ancestry ulcerative colitis cases, 1,086 European ancestry Type 1 diabetes cases, 1,123 Eur…	NA	12q13.2	12	56002984	SUOX	SUOX			6821			rs1689510-C	rs1689510	0	1689510	non_coding_transcript_exon_variant	0	0.31	4e-09	8.39794				Illumina [7347414] (imputed)	N
2008-06-16	17554300	WTCCC	2007-06-07	Nature	www.ncbi.nlm.nih.gov/pubmed/17554300	Genome-wide association study of 14,000 cases of seven common diseases and 3,000 shared controls.	Type 1 diabetes	1,963 European ancestry cases, 2,938 European ancestry controls	(see Todd 2007)	12p13.31	12	9681032	NR	CLEC2D			29121			rs3764021-C	rs3764021	0	3764021	splice_region_variant	0	0.47	5e-08	7.30103		1.57	[1.38-1.79]	Affymetrix [469557]	N
2008-06-16	17554300	WTCCC	2007-06-07	Nature	www.ncbi.nlm.nih.gov/pubmed/17554300	Genome-wide association study of 14,000 cases of seven common diseases and 3,000 shared controls.	Type 1 diabetes	1,963 European ancestry cases, 2,938 European ancestry controls	(see Todd 2007)	12p13.31	12	9703362	NR	CLEC2D - LOC105369652	29121	105369652		3807	257	rs11052552-G	rs11052552	0	11052552	upstream_gene_variant	1	0.49	7e-07	6.1549		1.49	[1.28-1.73]	Affymetrix [469557]	N
2012-12-11	23028342	Sandholm N	2012-09-20	PLoS Genet	www.ncbi.nlm.nih.gov/pubmed/23028342	New susceptibility loci associated with kidney disease in type 1 diabetes.	Type 1 diabetes nephropathy	Up to 2,916 European ancestry Type 1 Diabetes cases with nephropathy, 3,315 European ancestry Type 1 Diabetes cases without nephropathy	Up to 1,493 European ancestry Type 1 Diabetes cases with nephropathy, 3,191 European ancestry Type 1 Diabetes cases without nephropathy	12q24.31	12	120536707	RNF10, COQ5	RNF10			9921			rs614226-C	rs614226	0	614226	intron_variant	0	0.83	2e-06	5.69897	(ESRD)	1.35	[1.19-1.54]	Affymetrix, Illumina [~ 2500000] (imputed)	N
2011-10-26	21980299	Bradfield JP	2011-09-29	PLoS Genet	www.ncbi.nlm.nih.gov/pubmed/21980299	A genome-wide meta-analysis of six type 1 diabetes cohorts identifies multiple associated loci.	Type 1 diabetes	9,934 European ancestry cases, 16,956 European ancestry controls	1,120 European ancestry affected trios	13q22.2	13	75752146	LMO7	LMO7			4008			rs539514-?	rs539514	0	539514	intron_variant	0	0.5	6e-11	10.2218		1.43	[NR]	Affymetrix, Illumina [~ 2540000] (imputed)	N
2016-08-31	26301688	Li YR	2015-08-24	Nat Med	www.ncbi.nlm.nih.gov/pubmed/26301688	Meta-analysis of shared genetic architecture across ten pediatric autoimmune diseases.	Pediatric autoimmune diseases	97 European ancestry thyroiditis cases, 107 European ancestry ankylosing spondylitis cases, 100 European ancestry psoriasis cases, 173 European ancestry celiac disease cases, 254 European ancestry systemic lupus erythematosus cases, 308 European ancestry common variable inmunodeficiency cases, 865 European ancestry ulcerative colitis cases, 1,086 European ancestry Type 1 diabetes cases, 1,123 Eur…	NA	13q33.3	13	106410694	EFNB2	LINC00460 - RPL35P9	728192	100873796		32902	15063	rs11839053-C	rs11839053	0	11839053	intergenic_variant	1	0.02	1e-06	6				Illumina [7347414] (imputed)	N
2009-06-01	19430480	Barrett JC	2009-05-10	Nat Genet	www.ncbi.nlm.nih.gov/pubmed/19430480	Genome-wide association study and meta-analysis find that over 40 loci affect risk of type 1 diabetes.	Type 1 diabetes	7,514 cases, 9,045 controls	4,267 cases, 4,670 controls, 4,342 trios from 2,319 families	14q24.1	14	68796882	intergenic	ZFP36L1 - MAGOH3P	677	90352		639	64843	rs1465788-?	rs1465788	0	1465788	upstream_gene_variant	1	0.71	2e-12	11.699		1.16	[1.10-1.25]	Affymetrix, Illumina [841622] (imputed)	N
2009-12-28	19966805	Wallace C	2009-12-06	Nat Genet	www.ncbi.nlm.nih.gov/pubmed/19966805	The imprinted DLK1-MEG3 gene region on chromosome 14q32.2 alters susceptibility to type 1 diabetes.	Type 1 diabetes	7,514 European ancestry cases, 9,045 European ancestry controls	4,840 European ancestry cases, 2,670 European ancestry controls, 5,766 European ancestry familial triads	14q32.2	14	100839708	DIO3, DLK1, MEG3, RTL1	MEG3			55384			rs941576-A	rs941576	0	941576	intron_variant	0	0.57	1e-10	10		1.11	[1.06-1.16]	Affymetrix, Illumina [~ 2600000] (imputed)	N
2009-06-01	19430480	Barrett JC	2009-05-10	Nat Genet	www.ncbi.nlm.nih.gov/pubmed/19430480	Genome-wide association study and meta-analysis find that over 40 loci affect risk of type 1 diabetes.	Type 1 diabetes	7,514 cases, 9,045 controls	4,267 cases, 4,670 controls, 4,342 trios from 2,319 families	14q32.2	14	98032614	intergenic	LINC01550 - LOC107984706	388011	107984706		54490	1530	rs4900384-G	rs4900384	0	4900384	intergenic_variant	1	0.29	4e-09	8.39794		1.09	[1.02-1.16]	Affymetrix, Illumina [841622] (imputed)	N
2012-12-11	23028342	Sandholm N	2012-09-20	PLoS Genet	www.ncbi.nlm.nih.gov/pubmed/23028342	New susceptibility loci associated with kidney disease in type 1 diabetes.	Type 1 diabetes nephropathy	Up to 2,916 European ancestry Type 1 Diabetes cases with nephropathy, 3,315 European ancestry Type 1 Diabetes cases without nephropathy	Up to 1,493 European ancestry Type 1 Diabetes cases with nephropathy, 3,191 European ancestry Type 1 Diabetes cases without nephropathy	14q22.3	14	56754421	intergenic	RPL36AP1 - OTX2	100131379	5015		70644	46286	rs878889-A	rs878889	0	878889	upstream_gene_variant	1	0.13	8e-07	6.09691	(ESRD)	1.43	[1.24-1.65]	Affymetrix, Illumina [~ 2500000] (imputed)	N
2011-10-26	21980299	Bradfield JP	2011-09-29	PLoS Genet	www.ncbi.nlm.nih.gov/pubmed/21980299	A genome-wide meta-analysis of six type 1 diabetes cohorts identifies multiple associated loci.	Type 1 diabetes	9,934 European ancestry cases, 16,956 European ancestry controls	1,120 European ancestry affected trios	14q11.2	14	23370824	NR	EFS - IL25	10278	64806		5191	1985	rs10137082-?	rs10137082	0	10137082	upstream_gene_variant	1	NR	6e-06	5.22185		1.1	[NR]	Affymetrix, Illumina [~ 2540000] (imputed)	N
2008-11-26	18978792	Cooper JD	2008-11-02	Nat Genet	www.ncbi.nlm.nih.gov/pubmed/18978792	Meta-analysis of genome-wide association study data identifies additional type 1 diabetes risk loci.	Type 1 diabetes	3,561 European ancestry cases, 4,646 European ancestry controls	6,225 European ancestry cases, 6,946 European ancestry controls, 3,064 European ancestry trios from 2,828 families	15q25.1	15	78943104	CTSH	CTSH			1512			rs3825932-T	rs3825932	0	3825932	intron_variant	0	0.68	3e-15	14.5229		1.16	[1.10-1.22]	Affymetrix [up to 335565]	N
2016-08-31	26301688	Li YR	2015-08-24	Nat Med	www.ncbi.nlm.nih.gov/pubmed/26301688	Meta-analysis of shared genetic architecture across ten pediatric autoimmune diseases.	Pediatric autoimmune diseases	97 European ancestry thyroiditis cases, 107 European ancestry ankylosing spondylitis cases, 100 European ancestry psoriasis cases, 173 European ancestry celiac disease cases, 254 European ancestry systemic lupus erythematosus cases, 308 European ancestry common variable inmunodeficiency cases, 865 European ancestry ulcerative colitis cases, 1,086 European ancestry Type 1 diabetes cases, 1,123 Eur…	NA	15q22.33	15	67171953	SMAD3	SMAD3			4088			rs72743477-G	rs72743477	0	72743477	intron_variant	0	0.21	8e-11	10.0969				Illumina [7347414] (imputed)	N
2012-12-11	23028342	Sandholm N	2012-09-20	PLoS Genet	www.ncbi.nlm.nih.gov/pubmed/23028342	New susceptibility loci associated with kidney disease in type 1 diabetes.	Type 1 diabetes nephropathy	Up to 2,916 European ancestry Type 1 Diabetes cases with nephropathy, 3,315 European ancestry Type 1 Diabetes cases without nephropathy	Up to 1,493 European ancestry Type 1 Diabetes cases with nephropathy, 3,191 European ancestry Type 1 Diabetes cases without nephropathy	15q26.1	15	93598604	MCTP2, RGMA	LOC107983974			107983974			rs12437854-G	rs12437854	0	12437854	intron_variant	0	0.04	2e-09	8.69897	(ESRD vs. non-ESRD)	1.8	[1.48-2.17]	Affymetrix, Illumina [~ 2500000] (imputed)	N
2009-06-01	19430480	Barrett JC	2009-05-10	Nat Genet	www.ncbi.nlm.nih.gov/pubmed/19430480	Genome-wide association study and meta-analysis find that over 40 loci affect risk of type 1 diabetes.	Type 1 diabetes	7,514 cases, 9,045 controls	4,267 cases, 4,670 controls, 4,342 trios from 2,319 families	15q25.1	15	78943104	CTSH	CTSH			1512			rs3825932-?	rs3825932	0	3825932	intron_variant	0	NR	8e-08	7.09691				Affymetrix, Illumina [841622] (imputed)	N
2011-09-21	21829393	Plagnol V	2011-08-04	PLoS Genet	www.ncbi.nlm.nih.gov/pubmed/21829393	Genome-wide association analysis of autoantibody positivity in type 1 diabetes cases.	Type 1 diabetes	8,506 European ancestry cases, up to 10,596 European ancestry controls	NA	15q14	15	38614840	RASGRP1	LOC107984725			107984725			rs7171171-G	rs7171171	0	7171171	intergenic_variant	0	NR	2e-07	6.69897				Affymetrix, Illumina [NR]	N
2008-11-11	18840781	Grant SF	2008-10-07	Diabetes	www.ncbi.nlm.nih.gov/pubmed/18840781	Follow-up analysis of genome-wide association data identifies novel loci for type 1 diabetes.	Type 1 diabetes	563 European ancestry cases, 1,146 European ancestry controls, 483 European ancestry trios	3,303 European ancestry cases, 4,673 European ancestry controls	15q14	15	38546063	RASGRP1	RASGRP1			10125			rs8035957-C	rs8035957	0	8035957	intron_variant	0	NR	4e-06	5.39794		1.14	[1.08-1.21]	Illumina [up to 1000000]	N
2008-06-16	17554260	Todd JA	2007-06-06	Nat Genet	www.ncbi.nlm.nih.gov/pubmed/17554260	Robust associations of four new chromosome regions from genome-wide analyses of type 1 diabetes.	Type 1 diabetes	2,000 European ancestry cases, 3,000 European ancestry controls	2,997 European ancestry trios, 4,000 European ancestry cases, 5,000 European ancestry controls	16p13.13	16	11086016	KIAA0350	CLEC16A			23274			rs12708716-A	rs12708716	0	12708716	intron_variant	0	0.68	3e-18	17.5229		1.23	[1.16-1.30]	Affymetrix [NR]	N
2009-06-01	19430480	Barrett JC	2009-05-10	Nat Genet	www.ncbi.nlm.nih.gov/pubmed/19430480	Genome-wide association study and meta-analysis find that over 40 loci affect risk of type 1 diabetes.	Type 1 diabetes	7,514 cases, 9,045 controls	4,267 cases, 4,670 controls, 4,342 trios from 2,319 families	16p13.13	16	11086016	CLEC16A	CLEC16A			23274			rs12708716-?	rs12708716	0	12708716	intron_variant	0	NR	2e-16	15.699				Affymetrix, Illumina [841622] (imputed)	N
2009-06-01	19430480	Barrett JC	2009-05-10	Nat Genet	www.ncbi.nlm.nih.gov/pubmed/19430480	Genome-wide association study and meta-analysis find that over 40 loci affect risk of type 1 diabetes.	Type 1 diabetes	7,514 cases, 9,045 controls	4,267 cases, 4,670 controls, 4,342 trios from 2,319 families	16q23.1	16	75213347	intergenic	CTRB2 - CTRB1	440387	1504		6173	5639	rs7202877-G	rs7202877	0	7202877	intergenic_variant	1	0.1	3e-15	14.5229		1.28	[1.17-1.41]	Affymetrix, Illumina [841622] (imputed)	N
2011-09-21	21829393	Plagnol V	2011-08-04	PLoS Genet	www.ncbi.nlm.nih.gov/pubmed/21829393	Genome-wide association analysis of autoantibody positivity in type 1 diabetes cases.	Type 1 diabetes	8,506 European ancestry cases, up to 10,596 European ancestry controls	NA	16p13.13	16	11086016	CLEC16A	CLEC16A			23274			rs12708716-G	rs12708716	0	12708716	intron_variant	0	NR	5e-14	13.301		1.2	[NR]	Affymetrix, Illumina [NR]	N
2009-06-01	19430480	Barrett JC	2009-05-10	Nat Genet	www.ncbi.nlm.nih.gov/pubmed/19430480	Genome-wide association study and meta-analysis find that over 40 loci affect risk of type 1 diabetes.	Type 1 diabetes	7,514 cases, 9,045 controls	4,267 cases, 4,670 controls, 4,342 trios from 2,319 families	16p11.2	16	28528527	IL27	IL27 - NUPR1	246778	26471		1797	8814	rs4788084-G	rs4788084	0	4788084	downstream_gene_variant	1	0.42	3e-13	12.5229		1.09	[1.02-1.16]	Affymetrix, Illumina [841622] (imputed)	N
2008-11-26	18978792	Cooper JD	2008-11-02	Nat Genet	www.ncbi.nlm.nih.gov/pubmed/18978792	Meta-analysis of genome-wide association study data identifies additional type 1 diabetes risk loci.	Type 1 diabetes	3,561 European ancestry cases, 4,646 European ancestry controls	6,225 European ancestry cases, 6,946 European ancestry controls, 3,064 European ancestry trios from 2,828 families	16p13.13	16	11086016	CLEC16A	CLEC16A			23274			rs12708716-G	rs12708716	0	12708716	intron_variant	0	NR	7e-13	12.1549				Affymetrix [up to 335565]	N
2008-06-16	17632545	Hakonarson H	2007-07-15	Nature	www.ncbi.nlm.nih.gov/pubmed/17632545	A genome-wide association study identifies KIAA0350 as a type 1 diabetes gene.	Type 1 diabetes	467 European ancestry trios, 561 European ancestry cases, 1,143 European ancestry controls	390 European ancestry trios, 1,333 European ancestry cases from 549 families	16p13.13	16	11144926	KIAA0350	CLEC16A			23274			rs2903692-G	rs2903692	0	2903692	intron_variant	0	0.62	7e-11	10.1549		1.54	[1.32-1.79]	Illumina [543071]	N
2016-08-31	26301688	Li YR	2015-08-24	Nat Med	www.ncbi.nlm.nih.gov/pubmed/26301688	Meta-analysis of shared genetic architecture across ten pediatric autoimmune diseases.	Pediatric autoimmune diseases	97 European ancestry thyroiditis cases, 107 European ancestry ankylosing spondylitis cases, 100 European ancestry psoriasis cases, 173 European ancestry celiac disease cases, 254 European ancestry systemic lupus erythematosus cases, 308 European ancestry common variable inmunodeficiency cases, 865 European ancestry ulcerative colitis cases, 1,086 European ancestry Type 1 diabetes cases, 1,123 Eur…	NA	16q12.1	16	50634166	NOD2	NKD1			85407			rs117372389-T	rs117372389	0	117372389	3_prime_UTR_variant	0	0.02	8e-11	10.0969				Illumina [7347414] (imputed)	N
2016-08-31	26301688	Li YR	2015-08-24	Nat Med	www.ncbi.nlm.nih.gov/pubmed/26301688	Meta-analysis of shared genetic architecture across ten pediatric autoimmune diseases.	Pediatric autoimmune diseases	97 European ancestry thyroiditis cases, 107 European ancestry ankylosing spondylitis cases, 100 European ancestry psoriasis cases, 173 European ancestry celiac disease cases, 254 European ancestry systemic lupus erythematosus cases, 308 European ancestry common variable inmunodeficiency cases, 865 European ancestry ulcerative colitis cases, 1,086 European ancestry Type 1 diabetes cases, 1,123 Eur…	NA	16p12.1	16	28329624	SBK1	SBK1 - LOC105369182	388228	105369182		5775	11700	rs12598357-G	rs12598357	0	12598357	intergenic_variant	1	0.39	4e-09	8.39794				Illumina [7347414] (imputed)	N
2016-08-31	26301688	Li YR	2015-08-24	Nat Med	www.ncbi.nlm.nih.gov/pubmed/26301688	Meta-analysis of shared genetic architecture across ten pediatric autoimmune diseases.	Pediatric autoimmune diseases	97 European ancestry thyroiditis cases, 107 European ancestry ankylosing spondylitis cases, 100 European ancestry psoriasis cases, 173 European ancestry celiac disease cases, 254 European ancestry systemic lupus erythematosus cases, 308 European ancestry common variable inmunodeficiency cases, 865 European ancestry ulcerative colitis cases, 1,086 European ancestry Type 1 diabetes cases, 1,123 Eur…	NA	16q12.1	16	50270338	ADCY7	ADCY7			113			rs77150043-T	rs77150043	0	77150043	intron_variant	0	0.23	6e-09	8.22185				Illumina [7347414] (imputed)	N
2011-09-21	21829393	Plagnol V	2011-08-04	PLoS Genet	www.ncbi.nlm.nih.gov/pubmed/21829393	Genome-wide association analysis of autoantibody positivity in type 1 diabetes cases.	Type 1 diabetes	8,506 European ancestry cases, up to 10,596 European ancestry controls	NA	16p11.2	16	28528527	IL27	IL27 - NUPR1	246778	26471		1797	8814	rs4788084-C	rs4788084	0	4788084	downstream_gene_variant	1	NR	1e-08	8		1.15	[NR]	Affymetrix, Illumina [NR]	N
2009-06-01	19430480	Barrett JC	2009-05-10	Nat Genet	www.ncbi.nlm.nih.gov/pubmed/19430480	Genome-wide association study and meta-analysis find that over 40 loci affect risk of type 1 diabetes.	Type 1 diabetes	7,514 cases, 9,045 controls	4,267 cases, 4,670 controls, 4,342 trios from 2,319 families	16p12.3	16	20331250	intergenic	GP2 - UMOD	2813	7369		3445	1801	rs12444268-A	rs12444268	0	12444268	upstream_gene_variant	1	0.3	2e-07	6.69897		1.1	[1.03-1.17]	Affymetrix, Illumina [841622] (imputed)	N
2008-06-16	17554300	WTCCC	2007-06-07	Nature	www.ncbi.nlm.nih.gov/pubmed/17554300	Genome-wide association study of 14,000 cases of seven common diseases and 3,000 shared controls.	Type 1 diabetes	1,963 European ancestry cases, 2,938 European ancestry controls	(see Todd 2007)	16p13.13	16	11086016	KIAA0350	CLEC16A			23274			rs12708716-A	rs12708716	0	12708716	intron_variant	0	0.65	5e-07	6.30103		1.19	[0.97-1.45]	Affymetrix [469557]	N
2016-08-31	26301688	Li YR	2015-08-24	Nat Med	www.ncbi.nlm.nih.gov/pubmed/26301688	Meta-analysis of shared genetic architecture across ten pediatric autoimmune diseases.	Pediatric autoimmune diseases	97 European ancestry thyroiditis cases, 107 European ancestry ankylosing spondylitis cases, 100 European ancestry psoriasis cases, 173 European ancestry celiac disease cases, 254 European ancestry systemic lupus erythematosus cases, 308 European ancestry common variable inmunodeficiency cases, 865 European ancestry ulcerative colitis cases, 1,086 European ancestry Type 1 diabetes cases, 1,123 Eur…	NA	16p11.2	16	28835925	ATXN2L	ATXN2L			11273			rs12928404-C	rs12928404	0	12928404	splice_region_variant	0	0.38	6e-07	6.22185				Illumina [7347414] (imputed)	N
2008-11-26	18978792	Cooper JD	2008-11-02	Nat Genet	www.ncbi.nlm.nih.gov/pubmed/18978792	Meta-analysis of genome-wide association study data identifies additional type 1 diabetes risk loci.	Type 1 diabetes	3,561 European ancestry cases, 4,646 European ancestry controls	6,225 European ancestry cases, 6,946 European ancestry controls, 3,064 European ancestry trios from 2,828 families	16p13.13	16	11270222	TNP2, PRM3, C16orf75	LOC105371082			105371082			rs416603-T	rs416603	0	416603	intron_variant	0	0.44	3e-06	5.52288		1.06	[1.01-1.12]	Affymetrix [up to 335565]	N
2009-06-01	19430480	Barrett JC	2009-05-10	Nat Genet	www.ncbi.nlm.nih.gov/pubmed/19430480	Genome-wide association study and meta-analysis find that over 40 loci affect risk of type 1 diabetes.	Type 1 diabetes	7,514 cases, 9,045 controls	4,267 cases, 4,670 controls, 4,342 trios from 2,319 families	17q21.1	17	39909987	ORMDL3	GSDMB			55876			rs2290400-?	rs2290400	0	2290400	intron_variant	0	0.5	6e-13	12.2218		1.15	[1.08-1.22]	Affymetrix, Illumina [841622] (imputed)	N
2009-06-01	19430480	Barrett JC	2009-05-10	Nat Genet	www.ncbi.nlm.nih.gov/pubmed/19430480	Genome-wide association study and meta-analysis find that over 40 loci affect risk of type 1 diabetes.	Type 1 diabetes	7,514 cases, 9,045 controls	4,267 cases, 4,670 controls, 4,342 trios from 2,319 families	17q21.2	17	40614034	intergenic	CCR7 - SMARCE1	1236	6605		48550	13686	rs7221109-?	rs7221109	0	7221109	intergenic_variant	1	0.65	1e-09	9		1.05	[0.99-1.12]	Affymetrix, Illumina [841622] (imputed)	N
2016-08-31	26301688	Li YR	2015-08-24	Nat Med	www.ncbi.nlm.nih.gov/pubmed/26301688	Meta-analysis of shared genetic architecture across ten pediatric autoimmune diseases.	Pediatric autoimmune diseases	97 European ancestry thyroiditis cases, 107 European ancestry ankylosing spondylitis cases, 100 European ancestry psoriasis cases, 173 European ancestry celiac disease cases, 254 European ancestry systemic lupus erythematosus cases, 308 European ancestry common variable inmunodeficiency cases, 865 European ancestry ulcerative colitis cases, 1,086 European ancestry Type 1 diabetes cases, 1,123 Eur…	NA	17q21.1	17	39883866	IKZF3	ZPBP2 - GSDMB	124626	55876		5970	20729	rs12232497-C	rs12232497	0	12232497	intergenic_variant	1	0.45	3e-07	6.52288				Illumina [7347414] (imputed)	N
2009-06-01	19430480	Barrett JC	2009-05-10	Nat Genet	www.ncbi.nlm.nih.gov/pubmed/19430480	Genome-wide association study and meta-analysis find that over 40 loci affect risk of type 1 diabetes.	Type 1 diabetes	7,514 cases, 9,045 controls	4,267 cases, 4,670 controls, 4,342 trios from 2,319 families	17p13.1	17	7730374	intergenic	DNAH2			146754			rs16956936-?	rs16956936	0	16956936	intron_variant	0	0.86	5e-07	6.30103		1.09	[1.00-1.19]	Affymetrix, Illumina [841622] (imputed)	N
2011-09-21	21829393	Plagnol V	2011-08-04	PLoS Genet	www.ncbi.nlm.nih.gov/pubmed/21829393	Genome-wide association analysis of autoantibody positivity in type 1 diabetes cases.	Type 1 diabetes	8,506 European ancestry cases, up to 10,596 European ancestry controls	NA	17q21.1	17	39884510	ORMDL3	ZPBP2 - GSDMB	124626	55876		6614	20085	rs2872507-A	rs2872507	0	2872507	intergenic_variant	1	NR	2e-06	5.69897		1.1	[NR]	Affymetrix, Illumina [NR]	N
2009-06-01	19430480	Barrett JC	2009-05-10	Nat Genet	www.ncbi.nlm.nih.gov/pubmed/19430480	Genome-wide association study and meta-analysis find that over 40 loci affect risk of type 1 diabetes.	Type 1 diabetes	7,514 cases, 9,045 controls	4,267 cases, 4,670 controls, 4,342 trios from 2,319 families	18p11.21	18	12809341	PTPN2	PTPN2			5771			rs1893217-?	rs1893217	0	1893217	intron_variant	0	NR	4e-15	14.3979				Affymetrix, Illumina [841622] (imputed)	N
2008-06-16	17554260	Todd JA	2007-06-06	Nat Genet	www.ncbi.nlm.nih.gov/pubmed/17554260	Robust associations of four new chromosome regions from genome-wide analyses of type 1 diabetes.	Type 1 diabetes	2,000 European ancestry cases, 3,000 European ancestry controls	2,997 European ancestry trios, 4,000 European ancestry cases, 5,000 European ancestry controls	18p11.21	18	12779948	PTPN2	LOC100996324 - PTPN2	100996324	5771		30526	5530	rs2542151-C	rs2542151	0	2542151	upstream_gene_variant	1	0.16	1e-14	14		1.3	[1.22-1.40]	Affymetrix [NR]	N
2011-09-21	21829393	Plagnol V	2011-08-04	PLoS Genet	www.ncbi.nlm.nih.gov/pubmed/21829393	Genome-wide association analysis of autoantibody positivity in type 1 diabetes cases.	Type 1 diabetes	8,506 European ancestry cases, up to 10,596 European ancestry controls	NA	18p11.21	18	12779948	PTPN2	LOC100996324 - PTPN2	100996324	5771		30526	5530	rs2542151-G	rs2542151	0	2542151	upstream_gene_variant	1	NR	4e-13	12.3979		1.3	[NR]	Affymetrix, Illumina [NR]	N
2011-09-21	21829393	Plagnol V	2011-08-04	PLoS Genet	www.ncbi.nlm.nih.gov/pubmed/21829393	Genome-wide association analysis of autoantibody positivity in type 1 diabetes cases.	Type 1 diabetes	8,506 European ancestry cases, up to 10,596 European ancestry controls	NA	18q22.2	18	69864406	CD226	CD226			10666			rs763361-C	rs763361	0	763361	missense_variant	0	NR	1e-09	9		1.12	[NR]	Affymetrix, Illumina [NR]	N
2008-06-16	17554260	Todd JA	2007-06-06	Nat Genet	www.ncbi.nlm.nih.gov/pubmed/17554260	Robust associations of four new chromosome regions from genome-wide analyses of type 1 diabetes.	Type 1 diabetes	2,000 European ancestry cases, 3,000 European ancestry controls	2,997 European ancestry trios, 4,000 European ancestry cases, 5,000 European ancestry controls	18q22.2	18	69864406	CD226	CD226			10666			rs763361-A	rs763361	0	763361	missense_variant	0	0.47	1e-08	8		1.16	[1.10-1.22]	Affymetrix [NR]	N
2008-11-26	18978792	Cooper JD	2008-11-02	Nat Genet	www.ncbi.nlm.nih.gov/pubmed/18978792	Meta-analysis of genome-wide association study data identifies additional type 1 diabetes risk loci.	Type 1 diabetes	3,561 European ancestry cases, 4,646 European ancestry controls	6,225 European ancestry cases, 6,946 European ancestry controls, 3,064 European ancestry trios from 2,828 families	18p11.21	18	12779948	PTPN2	LOC100996324 - PTPN2	100996324	5771		30526	5530	rs2542151-C	rs2542151	0	2542151	upstream_gene_variant	1	NR	9e-08	7.04576				Affymetrix [up to 335565]	N
2009-06-01	19430480	Barrett JC	2009-05-10	Nat Genet	www.ncbi.nlm.nih.gov/pubmed/19430480	Genome-wide association study and meta-analysis find that over 40 loci affect risk of type 1 diabetes.	Type 1 diabetes	7,514 cases, 9,045 controls	4,267 cases, 4,670 controls, 4,342 trios from 2,319 families	19q13.32	19	46705224	intergenic	PRKD2			25865			rs425105-?	rs425105	0	425105	intron_variant	0	0.84	3e-11	10.5229		1.16	[1.08-1.27]	Affymetrix, Illumina [841622] (imputed)	N
2011-09-21	21829393	Plagnol V	2011-08-04	PLoS Genet	www.ncbi.nlm.nih.gov/pubmed/21829393	Genome-wide association analysis of autoantibody positivity in type 1 diabetes cases.	Type 1 diabetes	8,506 European ancestry cases, up to 10,596 European ancestry controls	NA	19p13.2	19	10364976	TYK2	TYK2			7297			rs2304256-?	rs2304256	0	2304256	missense_variant	0	NR	1e-10	10				Affymetrix, Illumina [NR]	N
2009-12-28	19966805	Wallace C	2009-12-06	Nat Genet	www.ncbi.nlm.nih.gov/pubmed/19966805	The imprinted DLK1-MEG3 gene region on chromosome 14q32.2 alters susceptibility to type 1 diabetes.	Type 1 diabetes	7,514 European ancestry cases, 9,045 European ancestry controls	4,840 European ancestry cases, 2,670 European ancestry controls, 5,766 European ancestry familial triads	19p13.2	19	10364976	TYK2	TYK2			7297			rs2304256-C	rs2304256	0	2304256	missense_variant	0	0.71	4e-09	8.39794		1.16	[1.11-1.22]	Affymetrix, Illumina [~ 2600000] (imputed)	N
2016-08-31	26301688	Li YR	2015-08-24	Nat Med	www.ncbi.nlm.nih.gov/pubmed/26301688	Meta-analysis of shared genetic architecture across ten pediatric autoimmune diseases.	Pediatric autoimmune diseases	97 European ancestry thyroiditis cases, 107 European ancestry ankylosing spondylitis cases, 100 European ancestry psoriasis cases, 173 European ancestry celiac disease cases, 254 European ancestry systemic lupus erythematosus cases, 308 European ancestry common variable inmunodeficiency cases, 865 European ancestry ulcerative colitis cases, 1,086 European ancestry Type 1 diabetes cases, 1,123 Eur…	NA	19q13.33	19	48703728	FUT2	FUT2, LOC105447645			2524, 105447645			rs602662-G	rs602662	0	602662	missense_variant	0	0.49	5e-08	7.30103				Illumina [7347414] (imputed)	N
2016-08-31	26301688	Li YR	2015-08-24	Nat Med	www.ncbi.nlm.nih.gov/pubmed/26301688	Meta-analysis of shared genetic architecture across ten pediatric autoimmune diseases.	Pediatric autoimmune diseases	97 European ancestry thyroiditis cases, 107 European ancestry ankylosing spondylitis cases, 100 European ancestry psoriasis cases, 173 European ancestry celiac disease cases, 254 European ancestry systemic lupus erythematosus cases, 308 European ancestry common variable inmunodeficiency cases, 865 European ancestry ulcerative colitis cases, 1,086 European ancestry Type 1 diabetes cases, 1,123 Eur…	NA	19p13.2	19	10476920	TYK2	PDE4A - KEAP1	5141	9817		7289	9200	rs62131887-T	rs62131887	0	62131887	intergenic_variant	1	0.28	4e-07	6.39794				Illumina [7347414] (imputed)	N
2009-06-01	19430480	Barrett JC	2009-05-10	Nat Genet	www.ncbi.nlm.nih.gov/pubmed/19430480	Genome-wide association study and meta-analysis find that over 40 loci affect risk of type 1 diabetes.	Type 1 diabetes	7,514 cases, 9,045 controls	4,267 cases, 4,670 controls, 4,342 trios from 2,319 families	20p13	20	1629905	intergenic	SIRPG			55423			rs2281808-?	rs2281808	0	2281808	intron_variant	0	0.64	1e-11	11		1.11	[1.05-1.19]	Affymetrix, Illumina [841622] (imputed)	N
2016-08-31	26301688	Li YR	2015-08-24	Nat Med	www.ncbi.nlm.nih.gov/pubmed/26301688	Meta-analysis of shared genetic architecture across ten pediatric autoimmune diseases.	Pediatric autoimmune diseases	97 European ancestry thyroiditis cases, 107 European ancestry ankylosing spondylitis cases, 100 European ancestry psoriasis cases, 173 European ancestry celiac disease cases, 254 European ancestry systemic lupus erythematosus cases, 308 European ancestry common variable inmunodeficiency cases, 865 European ancestry ulcerative colitis cases, 1,086 European ancestry Type 1 diabetes cases, 1,123 Eur…	NA	20q13.33	20	63637985	TNFRSF6B	LOC100505771 - STMN3	100505771	50861		9161	1720	rs2738774-A	rs2738774	0	2738774	downstream_gene_variant	1	0.32	9e-07	6.04576				Illumina [7347414] (imputed)	N
2012-12-11	23028342	Sandholm N	2012-09-20	PLoS Genet	www.ncbi.nlm.nih.gov/pubmed/23028342	New susceptibility loci associated with kidney disease in type 1 diabetes.	Type 1 diabetes nephropathy	Up to 2,916 European ancestry Type 1 Diabetes cases with nephropathy, 3,315 European ancestry Type 1 Diabetes cases without nephropathy	Up to 1,493 European ancestry Type 1 Diabetes cases with nephropathy, 3,191 European ancestry Type 1 Diabetes cases without nephropathy	20q13.33	20	60320788	RP5-1043L13.1	MIR646HG, LOC105372698			284757, 105372698			rs11698685-G	rs11698685	0	11698685	non_coding_transcript_exon_variant	0	0.68	1e-06	6	(ESRD)	1.27	[1.15-1.39]	Affymetrix, Illumina [~ 2500000] (imputed)	N
2017-03-31	27647854	Sandholm N	2016-09-19	J Am Soc Nephrol	www.ncbi.nlm.nih.gov/pubmed/27647854	The Genetic Landscape of Renal Complications in Type 1 Diabetes.	Chronic kidney disease (severe chronic kidney disease vs normal kidney function) in type 1 diabetes	907 European ancestry cases, 210 cases, 1,661 European ancestry controls, 357 controls	1,266 cases, 2,655 controls	20q13.33	20	60318758	NR	LOC105372698, MIR646HG			105372698, 284757			rs6027504-T	rs6027504	0	6027504	intron_variant	0	0.6	3e-06	5.52288		1.21	[1.12-1.30]	Illumina [NR] (imputed)	N
2012-12-11	23028342	Sandholm N	2012-09-20	PLoS Genet	www.ncbi.nlm.nih.gov/pubmed/23028342	New susceptibility loci associated with kidney disease in type 1 diabetes.	Type 1 diabetes nephropathy	Up to 2,916 European ancestry Type 1 Diabetes cases with nephropathy, 3,315 European ancestry Type 1 Diabetes cases without nephropathy	Up to 1,493 European ancestry Type 1 Diabetes cases with nephropathy, 3,191 European ancestry Type 1 Diabetes cases without nephropathy	20q13.33	20	60321657	RP5-1043L13.1	MIR646HG, LOC105372698			284757, 105372698			rs6027506-A	rs6027506	0	6027506	non_coding_transcript_exon_variant	0	0.63	5e-06	5.30103	(ESRD vs. non-ESRD)	1.22	[1.12-1.32]	Affymetrix, Illumina [~ 2500000] (imputed)	N
2012-12-11	23028342	Sandholm N	2012-09-20	PLoS Genet	www.ncbi.nlm.nih.gov/pubmed/23028342	New susceptibility loci associated with kidney disease in type 1 diabetes.	Type 1 diabetes nephropathy	Up to 2,916 European ancestry Type 1 Diabetes cases with nephropathy, 3,315 European ancestry Type 1 Diabetes cases without nephropathy	Up to 1,493 European ancestry Type 1 Diabetes cases with nephropathy, 3,191 European ancestry Type 1 Diabetes cases without nephropathy	20q11.21	20	32943738	intergenic	EFCAB8			388795			rs13045180-T	rs13045180	0	13045180	stop_gained	0	0.19	9e-06	5.04576	(ESRD)	1.28	[1.15-1.43]	Affymetrix, Illumina [~ 2500000] (imputed)	N
2009-06-01	19430480	Barrett JC	2009-05-10	Nat Genet	www.ncbi.nlm.nih.gov/pubmed/19430480	Genome-wide association study and meta-analysis find that over 40 loci affect risk of type 1 diabetes.	Type 1 diabetes	7,514 cases, 9,045 controls	4,267 cases, 4,670 controls, 4,342 trios from 2,319 families	21q22.3	21	42416077	UBASH3A	UBASH3A			53347			rs11203203-?	rs11203203	0	11203203	intron_variant	0	NR	2e-09	8.69897				Affymetrix, Illumina [841622] (imputed)	N
2008-11-11	18840781	Grant SF	2008-10-07	Diabetes	www.ncbi.nlm.nih.gov/pubmed/18840781	Follow-up analysis of genome-wide association data identifies novel loci for type 1 diabetes.	Type 1 diabetes	563 European ancestry cases, 1,146 European ancestry controls, 483 European ancestry trios	3,303 European ancestry cases, 4,673 European ancestry controls	21q22.3	21	42416281	UBASH3A	UBASH3A			53347			rs9976767-C	rs9976767	0	9976767	intron_variant	0	NR	2e-08	7.69897		1.16	[1.10-1.22]	Illumina [up to 1000000]	N
2016-08-31	26301688	Li YR	2015-08-24	Nat Med	www.ncbi.nlm.nih.gov/pubmed/26301688	Meta-analysis of shared genetic architecture across ten pediatric autoimmune diseases.	Pediatric autoimmune diseases	97 European ancestry thyroiditis cases, 107 European ancestry ankylosing spondylitis cases, 100 European ancestry psoriasis cases, 173 European ancestry celiac disease cases, 254 European ancestry systemic lupus erythematosus cases, 308 European ancestry common variable inmunodeficiency cases, 865 European ancestry ulcerative colitis cases, 1,086 European ancestry Type 1 diabetes cases, 1,123 Eur…	NA	21q22.2	21	39094644	PSMG1	LOC107985484 - RPL23AP12	107985484	391282		10111	32911	rs2836882-A	rs2836882	0	2836882	regulatory_region_variant	1	0.27	5e-08	7.30103				Illumina [7347414] (imputed)	N
2011-09-21	21829393	Plagnol V	2011-08-04	PLoS Genet	www.ncbi.nlm.nih.gov/pubmed/21829393	Genome-wide association analysis of autoantibody positivity in type 1 diabetes cases.	Type 1 diabetes	8,506 European ancestry cases, up to 10,596 European ancestry controls	NA	21q22.3	21	42421219	UBASH3A	UBASH3A			53347			rs3788013-A	rs3788013	0	3788013	intron_variant	0	NR	1e-07	7		1.1	[NR]	Affymetrix, Illumina [NR]	N
2009-06-01	19430480	Barrett JC	2009-05-10	Nat Genet	www.ncbi.nlm.nih.gov/pubmed/19430480	Genome-wide association study and meta-analysis find that over 40 loci affect risk of type 1 diabetes.	Type 1 diabetes	7,514 cases, 9,045 controls	4,267 cases, 4,670 controls, 4,342 trios from 2,319 families	22q12.2	22	30185733	intergenic	LOC105372988, HORMAD2			105372988, 150280			rs5753037-T	rs5753037	0	5753037	intron_variant	0	0.39	3e-16	15.5229		1.1	[1.04-1.17]	Affymetrix, Illumina [841622] (imputed)	N
2008-11-26	18978792	Cooper JD	2008-11-02	Nat Genet	www.ncbi.nlm.nih.gov/pubmed/18978792	Meta-analysis of genome-wide association study data identifies additional type 1 diabetes risk loci.	Type 1 diabetes	3,561 European ancestry cases, 4,646 European ancestry controls	6,225 European ancestry cases, 6,946 European ancestry controls, 3,064 European ancestry trios from 2,828 families	22q12.3	22	37195278	C1QTNF6	C1QTNF6			114904			rs229541-T	rs229541	0	229541	intron_variant	0	0.43	2e-08	7.69897		1.11	[1.05-1.16]	Affymetrix [up to 335565]	N
2009-06-01	19430480	Barrett JC	2009-05-10	Nat Genet	www.ncbi.nlm.nih.gov/pubmed/19430480	Genome-wide association study and meta-analysis find that over 40 loci affect risk of type 1 diabetes.	Type 1 diabetes	7,514 cases, 9,045 controls	4,267 cases, 4,670 controls, 4,342 trios from 2,319 families	22q12.3	22	37195278	C1QTNF6	C1QTNF6			114904			rs229541-?	rs229541	0	229541	intron_variant	0	NR	2e-07	6.69897				Affymetrix, Illumina [841622] (imputed)	N
2011-09-21	21829393	Plagnol V	2011-08-04	PLoS Genet	www.ncbi.nlm.nih.gov/pubmed/21829393	Genome-wide association analysis of autoantibody positivity in type 1 diabetes cases.	Type 1 diabetes	8,506 European ancestry cases, up to 10,596 European ancestry controls	NA	22q12.3	22	37155567	IL2RB	IL2RB - C1QTNF6	3560	114904		5645	24599	rs743777-G	rs743777	0	743777	intron_variant	1	NR	2e-06	5.69897		1.1	[NR]	Affymetrix, Illumina [NR]	N
2009-06-01	19430480	Barrett JC	2009-05-10	Nat Genet	www.ncbi.nlm.nih.gov/pubmed/19430480	Genome-wide association study and meta-analysis find that over 40 loci affect risk of type 1 diabetes.	Type 1 diabetes	7,514 cases, 9,045 controls	4,267 cases, 4,670 controls, 4,342 trios from 2,319 families	Xq28	X	154717327	intergenic	GAB3			139716			rs2664170-G	rs2664170	0	2664170	intron_variant	0	0.32	8e-09	8.09691		1.16	[1.07-1.24]	Affymetrix, Illumina [841622] (imputed)	N
2016-08-31	26301688	Li YR	2015-08-24	Nat Med	www.ncbi.nlm.nih.gov/pubmed/26301688	Meta-analysis of shared genetic architecture across ten pediatric autoimmune diseases.	Pediatric autoimmune diseases	97 European ancestry thyroiditis cases, 107 European ancestry ankylosing spondylitis cases, 100 European ancestry psoriasis cases, 173 European ancestry celiac disease cases, 254 European ancestry systemic lupus erythematosus cases, 308 European ancestry common variable inmunodeficiency cases, 865 European ancestry ulcerative colitis cases, 1,086 European ancestry Type 1 diabetes cases, 1,123 Eur…	NA	Xq26.3	X	136583619	CD40LG	RNU6-320P - LINC00892	106480570	100128420		274	55924	rs2807264-C	rs2807264	0	2807264	downstream_gene_variant	1	0.21	1e-08	8				Illumina [7347414] (imputed)	N
2016-08-31	26301688	Li YR	2015-08-24	Nat Med	www.ncbi.nlm.nih.gov/pubmed/26301688	Meta-analysis of shared genetic architecture across ten pediatric autoimmune diseases.	Pediatric autoimmune diseases	97 European ancestry thyroiditis cases, 107 European ancestry ankylosing spondylitis cases, 100 European ancestry psoriasis cases, 173 European ancestry celiac disease cases, 254 European ancestry systemic lupus erythematosus cases, 308 European ancestry common variable inmunodeficiency cases, 865 European ancestry ulcerative colitis cases, 1,086 European ancestry Type 1 diabetes cases, 1,123 Eur…	NA	Xq26.3	X	136949968	RBMX	LOC100289184 - LOC100420958	100289184	100420958		1835	11949	rs12863738-T	rs12863738	0	12863738	intron_variant	1	0.17	6e-08	7.22185				Illumina [7347414] (imputed)	N
2011-09-21	21829393	Plagnol V	2011-08-04	PLoS Genet	www.ncbi.nlm.nih.gov/pubmed/21829393	Genome-wide association analysis of autoantibody positivity in type 1 diabetes cases.	Type 1 diabetes	8,506 European ancestry cases, up to 10,596 European ancestry controls	NA				PTPN22							rs2476601-A	rs2476601	0	2476601		1	NR	2e-111	110.699		2	[NR]	Affymetrix, Illumina [NR]	N
2011-09-21	21829393	Plagnol V	2011-08-04	PLoS Genet	www.ncbi.nlm.nih.gov/pubmed/21829393	Genome-wide association analysis of autoantibody positivity in type 1 diabetes cases.	Type 1 diabetes	8,506 European ancestry cases, up to 10,596 European ancestry controls	NA				SH2B3							rs3184504-T	rs3184504	0	3184504		1	NR	2e-38	37.699		1.3	[NR]	Affymetrix, Illumina [NR]	N
2017-07-24	21829393	Plagnol V	2011-08-04	PLoS Genet	www.ncbi.nlm.nih.gov/pubmed/21829393	Genome-wide association analysis of autoantibody positivity in type 1 diabetes cases.	Gastric parietal cell autoantibody levels in type 1 diabetes	4,328 European ancestry cases	NA				ABO							rs657152-G	rs657152	0	657152		1		1e-13	13		2.94	[2.13-4.00]	Affymetrix, Illumina [NR]	N

## Sheet: Significant T1D eQTLs (CoDeS3D)
A complete summary of the significant type 1 diabetes associated expression eQTLs and tissue expression levels of eGenes analysed by the CoDeS3D algorithm
SNP	SNP_Chromosome	SNP_Locus	Gene_Name	Gene_Chromosome	Gene_Start	Gene_End	Tissue	p-value	Adj_p-value	Effect_Size	Cell_Lines	GTEx_cis_p_Threshold	cis_SNP-gene_interaction	SNP-gene_Distance	Expression_Level_In_eQTL_Tissue	Max_Expressed_Tissue	Maximum_Expression_Level	Min_Expressed_Tissue	Min_Expression_Level
rs1015166	6	32798730	RPS5	19	58897767	58906173	Brain_Putamen_basal_ganglia	8.787e-05	0.024715	-0.212552	KBM7	NA	FALSE	NA	74.78	Ovary	552.9	Brain_Anterior_cingulate_cortex_BA24	62.25
rs10822050	10	64438770	CNTN1	12	41086244	41466220	Small_Intestine_Terminal_Ileum	2.6349e-05	0.00885529	0.222838	KBM7	NA	FALSE	NA	0.4133	Brain_Cerebellar_Hemisphere	49.09	Whole_Blood	0.01065
rs11171739	12	56470624	PDE4DIP	1	144836157	145076186	Esophagus_Gastroesophageal_Junction	3.81783e-06	0.0016302	-0.136263	K562	NA	FALSE	NA	11.43	Muscle_Skeletal	128.4	Whole_Blood	0.7119
rs11203203	21	43836185	TIAM1	21	32490734	32932290	Brain_Frontal_Cortex_BA9	0.00015568	0.0395411	0.411666	IMR90	NA	FALSE	10903895	7.019	Brain_Cerebellar_Hemisphere	111.1	Muscle_Skeletal	0.1374
rs11580078	1	67669633	HHAT	1	210501596	210849638	Pituitary	0.000151057	0.0385607	-0.204429	K562	NA	FALSE	142831963	1.658	Adrenal_Gland	3.64	Muscle_Skeletal	0.06405
rs11698685	20	58895845	SLC1A3	5	36606457	36688436	Heart_Atrial_Appendage	2.3777e-05	0.00805985	0.214708	K562	NA	FALSE	NA	5.074	Brain_Nucleus_accumbens_basal_ganglia	149.8	Cells_EBV-transformed_lymphocytes	0.1297
rs12679857	8	119977336	UBE2E3	2	181831975	181941312	Brain_Spinal_cord_cervical_c-1	0.000187887	0.0460986	-0.266533	NHEK	NA	FALSE	NA	16.43	Nerve_Tibial	26.16	Whole_Blood	6.642
rs12708716	16	11179872	MAP3K9	14	71189243	71276251	Brain_Nucleus_accumbens_basal_ganglia	0.000201968	0.0490455	0.174744	KBM7	NA	FALSE	NA	2.263	Brain_Cerebellum	13.13	Cells_Transformed_fibroblasts	0.01745
rs12708716	16	11179872	NUP93	16	56764017	56878797	Nerve_Tibial	0.000183818	0.0452258	0.137754	K562	NA	FALSE	45584145	7.194	Testis	18.18	Liver	1.277
rs1270942	6	31918859	FLRT3	20	14303634	14318262	Brain_Cortex	8.3804e-05	0.0239138	0.475338	NHEK	NA	FALSE	NA	1.942	Lung	6.553	Whole_Blood	0
rs1270942	6	31918859	PPP1R18	6	30644166	30655672	Artery_Aorta	1.11682e-05	0.00419612	-0.300386	K562	NA	FALSE	1263187	31.13	Whole_Blood	112	Brain_Cerebellar_Hemisphere	2.289
rs1270942	6	31918859	PPP1R18	6	30644166	30655672	Artery_Tibial	1.44888e-08	1.05619e-05	-0.321843	K562	NA	FALSE	1263187	24.96	Whole_Blood	112	Brain_Cerebellar_Hemisphere	2.289
rs1270942	6	31918859	PPP1R18	6	30644166	30655672	Esophagus_Muscularis	9.19474e-05	0.0256889	-0.258369	K562	NA	FALSE	1263187	19.55	Whole_Blood	112	Brain_Cerebellar_Hemisphere	2.289
rs1270942	6	31918859	PPP1R18	6	30644166	30655672	Prostate	1.51751e-05	0.00543037	-0.440975	K562	NA	FALSE	1263187	13.89	Whole_Blood	112	Brain_Cerebellar_Hemisphere	2.289
rs1270942	6	31918859	PPP1R18	6	30644166	30655672	Thyroid	6.86848e-07	0.000356066	-0.243793	K562	NA	FALSE	1263187	13.17	Whole_Blood	112	Brain_Cerebellar_Hemisphere	2.289
rs1270942	6	31918859	WDR7	18	54318574	54698828	Artery_Tibial	8.42479e-05	0.0240017	-0.233615	HUVEC	NA	FALSE	NA	3.033	Brain_Frontal_Cortex_BA9	7.543	Whole_Blood	0.6835
rs13217044	6	8226996	GALNT11	7	151722759	151819425	Brain_Cerebellar_Hemisphere	0.000107172	0.0290818	-0.208756	K562	NA	FALSE	NA	9.916	Kidney_Cortex	14.65	Whole_Blood	1.404
rs1701704	12	56412486	PDE1B	12	54943134	54973023	Adipose_Subcutaneous	0.000160892	0.0406023	0.154498	KBM7	NA	FALSE	1439463	14.82	Brain_Caudate_basal_ganglia	115.1	Cells_Transformed_fibroblasts	0.04009
rs1701704	12	56412486	RARG	12	53604354	53626764	Adrenal_Gland	0.000197014	0.048038	0.201151	HUVEC	NA	FALSE	2785722	7.362	Esophagus_Mucosa	55.78	Liver	0.7102
rs17166496	5	132628883	UBAC2	13	99853028	100038688	Ovary	4.01479e-05	0.0127648	0.303015	NHEK	NA	FALSE	NA	10.35	Testis	19.3	Brain_Spinal_cord_cervical_c-1	5.208
rs17466626	12	40760630	LEMD3	12	65563351	65642107	Stomach	0.000112259	0.0300452	0.982934	NHEK	NA	FALSE	24802721	5.609	Brain_Cerebellar_Hemisphere	10.33	Whole_Blood	1.94
rs1893217	18	12809339	DSCAM	21	41382926	42219065	Brain_Hypothalamus	9.37317e-05	0.0260528	-0.670879	HUVEC	NA	FALSE	NA	3.747	Pituitary	3.82	Cells_EBV-transformed_lymphocytes	0
rs1983853	1	85311191	ZNF644	1	91380859	91487829	Brain_Putamen_basal_ganglia	1.67167e-05	0.00593397	0.310963	NHEK	NA	FALSE	6069668	2.502	Nerve_Tibial	6.989	Whole_Blood	0.6243
rs1990760	2	163124050	TXNL4B	16	72078188	72128330	Adrenal_Gland	9.28749e-05	0.0258961	0.310727	KBM7	NA	FALSE	NA	3.555	Testis	9.455	Heart_Atrial_Appendage	2.147
rs2153977	1	114080070	SLC6A17	1	110693108	110744824	Cells_Transformed_fibroblasts	0.000193096	0.0472128	0.175407	HUVEC	NA	FALSE	3335246	0.03252	Brain_Cortex	41.02	Cells_EBV-transformed_lymphocytes	0.005348
rs2153977	1	114080070	TSPAN2	1	115590632	115632121	Brain_Cerebellar_Hemisphere	0.000162537	0.0409299	-0.500684	KBM7	NA	FALSE	1510562	0.1479	Colon_Sigmoid	27.96	Cells_EBV-transformed_lymphocytes	0.0224
rs2251396	6	31364706	HLA-DQB2	6	32723875	32731311	Skin_Sun_Exposed_Lower_leg	3.9858e-05	0.0127183	0.181034	KBM7	NA	FALSE	1359169	13.32	Skin_Not_Sun_Exposed_Suprapubic	16.19	Cells_Transformed_fibroblasts	0
rs2251396	6	31364706	JMJD1C	10	64926981	65225722	Pancreas	0.000149684	0.038238	-0.204753	HUVEC	NA	FALSE	NA	3.782	Brain_Cerebellum	20.72	Heart_Left_Ventricle	2.859
rs2281808	20	1610550	PRAM1	19	8554940	8567996	Heart_Left_Ventricle	0.00017948	0.0443767	0.217182	KBM7	NA	FALSE	NA	0.1918	Whole_Blood	35.21	Cells_Transformed_fibroblasts	0.03889
rs2292239	12	56482179	RELT	11	73087309	73108519	Nerve_Tibial	0.000187079	0.0459322	0.15702	IMR90	NA	FALSE	NA	1.252	Whole_Blood	25.59	Pancreas	0.1911
rs2304256	19	10475651	CHAF1A	19	4402659	4445015	Brain_Substantia_nigra	0.000115524	0.0307097	-0.527873	K562	NA	FALSE	6030636	1.75	Cells_EBV-transformed_lymphocytes	13	Liver	0.8513
rs2542151	18	12779946	JUP	17	39775692	39943183	Stomach	6.99926e-05	0.0205703	-0.142417	KBM7	NA	FALSE	NA	31.59	Skin_Sun_Exposed_Lower_leg	473.7	Whole_Blood	1.326
rs2542151	18	12779946	THSD4	15	71389291	72075722	Brain_Cortex	1.48367e-05	0.00531465	-0.527612	KBM7	NA	FALSE	NA	0.7788	Esophagus_Mucosa	20.82	Whole_Blood	0.008741
rs2664170	X	153945601	THOC7	3	63819546	63849579	Minor_Salivary_Gland	9.98025e-06	0.00377385	-0.197652	KBM7	NA	FALSE	NA	16.43	Cells_EBV-transformed_lymphocytes	44.52	Whole_Blood	6.858
rs2836882	21	40466569	AP3B1	5	77296349	77590579	Brain_Hippocampus	0.000161604	0.0407528	0.2336	HUVEC	NA	FALSE	NA	3.396	Cells_EBV-transformed_lymphocytes	12.54	Liver	2.07
rs2857595	6	31568468	SAMD12	8	119201698	119634234	Brain_Anterior_cingulate_cortex_BA24	9.65947e-05	0.0267225	0.169302	HUVEC	NA	FALSE	NA	2.603	Brain_Frontal_Cortex_BA9	4.267	Whole_Blood	0.03209
rs2872507	17	38040762	CLSTN2	3	139654027	140296239	Small_Intestine_Terminal_Ileum	0.000203055	0.0492391	0.2235	KBM7	NA	FALSE	NA	0.6322	Ovary	37.56	Whole_Blood	0.006076
rs2903692	16	11238782	LINC00535	8	94225531	94712661	Liver	9.79616e-05	0.026995	-0.310098	KBM7	NA	FALSE	NA	0.08821	Testis	4.49	Cells_EBV-transformed_lymphocytes	0
rs3024505	1	206939903	PLXNA2	1	208195587	208417665	Brain_Amygdala	0.000130243	0.0338836	-0.413283	HUVEC	NA	FALSE	1255684	2.875	Brain_Cerebellum	12.96	Cells_EBV-transformed_lymphocytes	0.06386
rs3024505	1	206939903	RAB3GAP2	1	220321635	220445796	Brain_Caudate_basal_ganglia	0.000143977	0.0369939	0.265206	K562	NA	FALSE	13381732	2.848	Cells_EBV-transformed_lymphocytes	12.91	Whole_Blood	1.345
rs3184504	12	111884607	ARHGAP42	11	100558384	100862668	Cells_EBV-transformed_lymphocytes	4.76464e-05	0.0148109	0.402481	HUVEC	NA	FALSE	NA	0.3683	Nerve_Tibial	4.286	Whole_Blood	0.04155
rs3741208	11	2169773	EIF3F	11	7991798	8023409	Nerve_Tibial	0.000198522	0.0483388	0.100954	NHEK	NA	FALSE	5822025	21.87	Ovary	36.9	Liver	7.745
rs3788013	21	43841327	GNAO1	16	56225302	56391356	Testis	7.71837e-05	0.022386	-0.26312	K562	NA	FALSE	NA	6.522	Brain_Caudate_basal_ganglia	47.17	Cells_EBV-transformed_lymphocytes	0.0139
rs4084127	11	69596522	SUV420H1	11	67922330	67981295	Pancreas	3.44116e-05	0.0111515	0.273924	K562	NA	FALSE	1615227	4.514	Brain_Cerebellar_Hemisphere	12.37	Heart_Left_Ventricle	3.091
rs4246905	9	117553248	CENPP	9	95087766	95382815	Cells_Transformed_fibroblasts	0.00020321	0.049243	0.184461	NHEK	NA	FALSE	22170433	0.516	Skin_Not_Sun_Exposed_Suprapubic	3.598	Whole_Blood	0.177
rs4505848	4	123132491	ELF2	4	139949266	140098372	Brain_Hypothalamus	0.000183998	0.0452386	0.30194	NHEK	NA	FALSE	16816775	3.375	Testis	12.87	Brain_Anterior_cingulate_cortex_BA24	2.618
rs4625	3	49572139	ACLY	17	40023161	40086795	Whole_Blood	7.5106e-05	0.0218731	-0.0916056	HUVEC	NA	FALSE	NA	9.295	Cells_Transformed_fibroblasts	50.57	Muscle_Skeletal	4.713
rs4625	3	49572139	DOCK3	3	50712672	51421629	Artery_Coronary	5.02798e-06	0.00206464	-0.316843	NHEK	NA	FALSE	1140533	1.501	Brain_Cerebellum	19.57	Liver	0.05397
rs4625	3	49572139	DOCK3	3	50712672	51421629	Skin_Sun_Exposed_Lower_leg	3.42409e-11	3.93051e-08	-0.30404	NHEK	NA	FALSE	1140533	1.762	Brain_Cerebellum	19.57	Liver	0.05397
rs4625	3	49572139	NPAT	11	108027942	108093369	Heart_Left_Ventricle	0.000107857	0.029176	0.170139	K562	NA	FALSE	NA	0.9926	Cells_EBV-transformed_lymphocytes	7.628	Muscle_Skeletal	0.9527
rs478222	2	25301754	RBMS3	3	29322473	30051886	Brain_Hippocampus	5.06084e-06	0.00207572	-0.399118	HUVEC	NA	FALSE	NA	0.6872	Nerve_Tibial	11.51	Whole_Blood	0.02276
rs478222	2	25301754	SLC8A1	2	40324410	40838193	Muscle_Skeletal	2.86911e-05	0.00955161	-0.154077	KBM7	NA	FALSE	15022656	0.05	Heart_Left_Ventricle	8.001	Cells_EBV-transformed_lymphocytes	0.009671
rs550448	7	28229041	AACS	12	125549925	125627873	Brain_Spinal_cord_cervical_c-1	0.000156447	0.0396504	-0.734831	NHEK	NA	FALSE	NA	0.9273	Skin_Not_Sun_Exposed_Suprapubic	8.805	Whole_Blood	0.3419
rs602662	19	49206984	CAMTA1	1	6845384	7829766	Pancreas	6.39616e-05	0.0190192	-0.28979	K562	NA	FALSE	NA	1.147	Brain_Cerebellar_Hemisphere	19.21	Whole_Blood	0.5706
rs614226	12	120974509	CCDC92	12	124403207	124457378	Brain_Hippocampus	7.50883e-05	0.0218731	0.22221	NHEK	NA	FALSE	3428698	20.5	Brain_Frontal_Cortex_BA9	26.68	Cells_EBV-transformed_lymphocytes	1.606
rs614226	12	120974509	HLA-E	6	30457244	30461982	Skin_Not_Sun_Exposed_Suprapubic	0.000189274	0.0463746	0.186114	IMR90	NA	FALSE	NA	326.9	Whole_Blood	1358	Brain_Cerebellar_Hemisphere	25.84
rs7111341	11	2213165	TMEM80	11	695428	705028	Brain_Substantia_nigra	7.4694e-05	0.021807	0.624507	NHEK	NA	FALSE	1508137	4.578	Thyroid	21.07	Heart_Left_Ventricle	2.727
rs71597855	4	54656436	UNC5C	4	96083655	96470357	Adipose_Subcutaneous	6.27057e-05	0.0186929	0.590685	NHEK	NA	FALSE	41427219	0.1941	Thyroid	4.322	Cells_EBV-transformed_lymphocytes	0.003306
rs7221109	17	38770285	VSX1	20	25051521	25062996	Brain_Hypothalamus	4.56762e-05	0.0142785	-0.521666	KBM7	NA	FALSE	NA	0.8217	Brain_Cerebellar_Hemisphere	7.938	Adipose_Visceral_Omentum	0
rs72743477	15	67464290	TCF12	15	57210821	57591479	Skin_Not_Sun_Exposed_Suprapubic	2.187e-05	0.00749973	0.117711	HUVEC	NA	FALSE	9872811	6.61	Cervix_Endocervix	14.19	Whole_Blood	1.258
rs743777	22	37551606	SMCHD1	18	2655737	2805015	Brain_Cortex	0.000160146	0.0404428	0.228427	KBM7	NA	FALSE	NA	3.261	Cells_EBV-transformed_lymphocytes	18.51	Brain_Putamen_basal_ganglia	2.286
rs7660520	4	183745320	SORBS2	4	186506598	186877806	Brain_Substantia_nigra	0.000170294	0.0425497	-0.522897	NHEK	NA	FALSE	2761278	1.58	Artery_Tibial	61.93	Whole_Blood	0.03671
rs7672495	4	4992366	MEF2C-AS1	5	88179145	88762215	Brain_Spinal_cord_cervical_c-1	0.000107235	0.0290818	0.45169	HUVEC	NA	FALSE	NA	0.1586	Testis	0.8087	Pancreas	0.01483
rs77150043	16	50304248	SSR2	1	155978839	155990750	Brain_Spinal_cord_cervical_c-1	1.2589e-06	0.00060474	0.347895	KBM7	NA	FALSE	NA	24.28	Ovary	124.5	Muscle_Skeletal	17.28
rs886424	6	30782001	BTN3A2	6	26365387	26378546	Adipose_Subcutaneous	2.84097e-12	3.74788e-09	-0.519451	KBM7	NA	FALSE	4403455	7.184	Spleen	41.38	Muscle_Skeletal	1.119
rs886424	6	30782001	BTN3A2	6	26365387	26378546	Adipose_Visceral_Omentum	0.000201795	0.0490455	-0.283682	KBM7	NA	FALSE	4403455	9.306	Spleen	41.38	Muscle_Skeletal	1.119
rs886424	6	30782001	BTN3A2	6	26365387	26378546	Adrenal_Gland	8.433e-05	0.0240057	-0.625362	KBM7	NA	FALSE	4403455	14.76	Spleen	41.38	Muscle_Skeletal	1.119
rs886424	6	30782001	BTN3A2	6	26365387	26378546	Artery_Aorta	1.07134e-07	6.63355e-05	-0.502039	KBM7	NA	FALSE	4403455	4.72	Spleen	41.38	Muscle_Skeletal	1.119
rs886424	6	30782001	BTN3A2	6	26365387	26378546	Artery_Tibial	3.73369e-14	6.50275e-11	-0.477543	KBM7	NA	FALSE	4403455	3.183	Spleen	41.38	Muscle_Skeletal	1.119
rs886424	6	30782001	BTN3A2	6	26365387	26378546	Brain_Caudate_basal_ganglia	1.97789e-05	0.00688953	-0.687726	KBM7	NA	FALSE	4403455	2.015	Spleen	41.38	Muscle_Skeletal	1.119
rs886424	6	30782001	BTN3A2	6	26365387	26378546	Brain_Cerebellar_Hemisphere	1.92643e-06	0.000890322	-0.940191	KBM7	NA	FALSE	4403455	1.817	Spleen	41.38	Muscle_Skeletal	1.119
rs886424	6	30782001	BTN3A2	6	26365387	26378546	Brain_Cerebellum	6.22521e-06	0.00249257	-0.740851	KBM7	NA	FALSE	4403455	2.093	Spleen	41.38	Muscle_Skeletal	1.119
rs886424	6	30782001	BTN3A2	6	26365387	26378546	Brain_Frontal_Cortex_BA9	6.19681e-07	0.000323619	-0.805878	KBM7	NA	FALSE	4403455	1.48	Spleen	41.38	Muscle_Skeletal	1.119
rs886424	6	30782001	BTN3A2	6	26365387	26378546	Brain_Spinal_cord_cervical_c-1	0.000139267	0.0359404	-0.782721	KBM7	NA	FALSE	4403455	5.438	Spleen	41.38	Muscle_Skeletal	1.119
rs886424	6	30782001	BTN3A2	6	26365387	26378546	Breast_Mammary_Tissue	1.36867e-05	0.0049835	-0.39968	KBM7	NA	FALSE	4403455	7.893	Spleen	41.38	Muscle_Skeletal	1.119
rs886424	6	30782001	BTN3A2	6	26365387	26378546	Cells_Transformed_fibroblasts	7.4249e-08	4.71292e-05	-0.526169	KBM7	NA	FALSE	4403455	6.129	Spleen	41.38	Muscle_Skeletal	1.119
rs886424	6	30782001	BTN3A2	6	26365387	26378546	Esophagus_Gastroesophageal_Junction	7.26508e-07	0.000372259	-0.503118	KBM7	NA	FALSE	4403455	4.013	Spleen	41.38	Muscle_Skeletal	1.119
rs886424	6	30782001	BTN3A2	6	26365387	26378546	Esophagus_Mucosa	1.47132e-13	2.32228e-10	-0.602494	KBM7	NA	FALSE	4403455	4.853	Spleen	41.38	Muscle_Skeletal	1.119
rs886424	6	30782001	BTN3A2	6	26365387	26378546	Esophagus_Muscularis	2.74679e-09	2.35712e-06	-0.502613	KBM7	NA	FALSE	4403455	3.693	Spleen	41.38	Muscle_Skeletal	1.119
rs886424	6	30782001	BTN3A2	6	26365387	26378546	Heart_Atrial_Appendage	0.000132392	0.0343669	-0.373817	KBM7	NA	FALSE	4403455	3.485	Spleen	41.38	Muscle_Skeletal	1.119
rs886424	6	30782001	BTN3A2	6	26365387	26378546	Heart_Left_Ventricle	4.99317e-10	4.74556e-07	-0.510737	KBM7	NA	FALSE	4403455	2.532	Spleen	41.38	Muscle_Skeletal	1.119
rs886424	6	30782001	BTN3A2	6	26365387	26378546	Liver	2.29983e-05	0.007841	-0.629428	KBM7	NA	FALSE	4403455	4.288	Spleen	41.38	Muscle_Skeletal	1.119
rs886424	6	30782001	BTN3A2	6	26365387	26378546	Lung	6.46846e-17	1.54523e-13	-0.646054	KBM7	NA	FALSE	4403455	15.8	Spleen	41.38	Muscle_Skeletal	1.119
rs886424	6	30782001	BTN3A2	6	26365387	26378546	Muscle_Skeletal	5.09412e-12	6.57314e-09	-0.526452	KBM7	NA	FALSE	4403455	1.119	Spleen	41.38	Muscle_Skeletal	1.119
rs886424	6	30782001	BTN3A2	6	26365387	26378546	Nerve_Tibial	1.29416e-18	3.54693e-15	-0.663118	KBM7	NA	FALSE	4403455	5.942	Spleen	41.38	Muscle_Skeletal	1.119
rs886424	6	30782001	BTN3A2	6	26365387	26378546	Ovary	1.85204e-08	1.30959e-05	-0.918137	KBM7	NA	FALSE	4403455	8.905	Spleen	41.38	Muscle_Skeletal	1.119
rs886424	6	30782001	BTN3A2	6	26365387	26378546	Pituitary	1.33171e-05	0.00488535	-0.759414	KBM7	NA	FALSE	4403455	8.351	Spleen	41.38	Muscle_Skeletal	1.119
rs886424	6	30782001	BTN3A2	6	26365387	26378546	Skin_Not_Sun_Exposed_Suprapubic	2.4652e-07	0.000140805	-0.462654	KBM7	NA	FALSE	4403455	7.859	Spleen	41.38	Muscle_Skeletal	1.119
rs886424	6	30782001	BTN3A2	6	26365387	26378546	Skin_Sun_Exposed_Lower_leg	7.95574e-15	1.46499e-11	-0.653321	KBM7	NA	FALSE	4403455	5.771	Spleen	41.38	Muscle_Skeletal	1.119
rs886424	6	30782001	BTN3A2	6	26365387	26378546	Spleen	7.14703e-06	0.0028233	-0.721489	KBM7	NA	FALSE	4403455	41.38	Spleen	41.38	Muscle_Skeletal	1.119
rs886424	6	30782001	BTN3A2	6	26365387	26378546	Stomach	6.47103e-09	5.16445e-06	-0.488867	KBM7	NA	FALSE	4403455	5.284	Spleen	41.38	Muscle_Skeletal	1.119
rs886424	6	30782001	BTN3A2	6	26365387	26378546	Testis	2.78697e-06	0.00123631	-0.573836	KBM7	NA	FALSE	4403455	3.585	Spleen	41.38	Muscle_Skeletal	1.119
rs886424	6	30782001	BTN3A2	6	26365387	26378546	Thyroid	1.28699e-12	1.78439e-09	-0.52997	KBM7	NA	FALSE	4403455	7.737	Spleen	41.38	Muscle_Skeletal	1.119
rs886424	6	30782001	BTN3A2	6	26365387	26378546	Uterus	3.23434e-05	0.0106274	-0.691277	KBM7	NA	FALSE	4403455	11.64	Spleen	41.38	Muscle_Skeletal	1.119
rs886424	6	30782001	BTN3A2	6	26365387	26378546	Vagina	3.47699e-12	4.55296e-09	-0.967185	KBM7	NA	FALSE	4403455	8.261	Spleen	41.38	Muscle_Skeletal	1.119
rs886424	6	30782001	BTN3A2	6	26365387	26378546	Whole_Blood	6.02459e-13	8.72956e-10	-0.486058	KBM7	NA	FALSE	4403455	15.13	Spleen	41.38	Muscle_Skeletal	1.119
rs886424	6	30782001	GRM4	6	33989628	34123399	Uterus	8.61753e-06	0.00333708	0.639538	KBM7	NA	FALSE	3207627	0.08778	Brain_Cerebellar_Hemisphere	149.3	Liver	0.002762
rs924043	6	170379024	HLA-DPA1	6	33032346	33048552	Liver	2.91118e-05	0.00968257	0.292045	KBM7	NA	FALSE	137330472	5.844	Cells_EBV-transformed_lymphocytes	330.1	Cells_Transformed_fibroblasts	1.08
rs9388489	6	126698718	UBAC1	9	138824815	138853226	Minor_Salivary_Gland	4.82765e-05	0.0149068	-0.319103	HUVEC	NA	FALSE	NA	12.81	Muscle_Skeletal	65.24	Pancreas	5.949
rs9653442	2	100825366	SULT1C2	2	108905095	108926371	Esophagus_Mucosa	9.17735e-05	0.0256889	-0.261061	IMR90	NA	FALSE	8079729	0.01626	Kidney_Cortex	29.21	Whole_Blood	0
rs9850225	3	80865763	PRICKLE2	3	64079543	64431152	Skin_Not_Sun_Exposed_Suprapubic	2.47293e-05	0.00835861	0.211968	KBM7	NA	FALSE	16434611	3.68	Colon_Sigmoid	18.63	Whole_Blood	0.03497
rs9976767	21	43836389	SYNGAP1	6	33387847	33421466	Liver	0.000173205	0.0431247	0.170277	K562	NA	FALSE	NA	1.018	Pituitary	33.75	Muscle_Skeletal	0.659
rs1004446	11	2170142	IGF2	11	2150342	2170833	Esophagus_Mucosa	1.73917e-05	0.00612404	0.150304	KBM7	NA	TRUE	0	1.831	Liver	39.75	Cells_EBV-transformed_lymphocytes	0.02576
rs1004446	11	2170142	IGF2-AS	11	2161731	2169894	Brain_Putamen_basal_ganglia	0.000125423	0.0327985	0.436255	KBM7	NA	TRUE	248	0.05962	Nerve_Tibial	0.8458	Cells_EBV-transformed_lymphocytes	0
rs1004446	11	2170142	IGF2-AS	11	2161731	2169894	Esophagus_Mucosa	8.50547e-05	0.0241343	0.24246	KBM7	NA	TRUE	248	0.01876	Nerve_Tibial	0.8458	Cells_EBV-transformed_lymphocytes	0
rs1004446	11	2170142	IGF2-AS	11	2161731	2169894	Liver	3.50933e-08	2.36782e-05	0.498165	KBM7	NA	TRUE	248	0.5799	Nerve_Tibial	0.8458	Cells_EBV-transformed_lymphocytes	0
rs10137082	14	23840032	EFS	14	23825611	23834961	Adipose_Visceral_Omentum	5.29124e-05	0.0161968	0.161454	KBM7	NA	TRUE	5071	10.06	Nerve_Tibial	37.05	Cells_EBV-transformed_lymphocytes	0.02719
rs1015166	6	32798730	HLA-DMA	6	32916390	32936871	Artery_Tibial	8.60358e-05	0.0243408	0.109593	HUVEC	NA	TRUE	117660	8.271	Cells_EBV-transformed_lymphocytes	97.49	Brain_Cerebellum	1.812
rs1015166	6	32798730	HLA-DMA	6	32916390	32936871	Cells_Transformed_fibroblasts	1.37161e-05	0.00498906	0.258391	HUVEC	NA	TRUE	117660	1.885	Cells_EBV-transformed_lymphocytes	97.49	Brain_Cerebellum	1.812
rs1015166	6	32798730	HLA-DMA	6	32916390	32936871	Heart_Left_Ventricle	0.000117365	0.0310822	0.18682	HUVEC	NA	TRUE	117660	4.989	Cells_EBV-transformed_lymphocytes	97.49	Brain_Cerebellum	1.812
rs1015166	6	32798730	HLA-DMA	6	32916390	32936871	Liver	0.000203882	0.0493381	0.347591	HUVEC	NA	TRUE	117660	4.545	Cells_EBV-transformed_lymphocytes	97.49	Brain_Cerebellum	1.812
rs1015166	6	32798730	HLA-DMA	6	32916390	32936871	Muscle_Skeletal	0.000152186	0.0387929	0.149951	HUVEC	NA	TRUE	117660	3.023	Cells_EBV-transformed_lymphocytes	97.49	Brain_Cerebellum	1.812
rs1015166	6	32798730	HLA-DMA	6	32916390	32936871	Skin_Sun_Exposed_Lower_leg	0.000129395	0.0337127	0.148321	HUVEC	NA	TRUE	117660	14.85	Cells_EBV-transformed_lymphocytes	97.49	Brain_Cerebellum	1.812
rs1015166	6	32798730	HLA-DMA	6	32916390	32936871	Thyroid	3.88768e-08	2.60816e-05	0.260636	HUVEC	NA	TRUE	117660	20.24	Cells_EBV-transformed_lymphocytes	97.49	Brain_Cerebellum	1.812
rs1015166	6	32798730	HLA-DOB	6	32780540	32784825	Artery_Tibial	0.00020198	0.0490455	-0.230344	K562	NA	TRUE	13905	0.43	Spleen	39.32	Muscle_Skeletal	0.1555
rs1015166	6	32798730	HLA-DOB	6	32780540	32784825	Colon_Sigmoid	3.85391e-05	0.0123086	-0.364936	K562	NA	TRUE	13905	0.6099	Spleen	39.32	Muscle_Skeletal	0.1555
rs1015166	6	32798730	HLA-DOB	6	32780540	32784825	Nerve_Tibial	4.63934e-07	0.0002489	-0.377158	K562	NA	TRUE	13905	1.718	Spleen	39.32	Muscle_Skeletal	0.1555
rs1015166	6	32798730	HLA-DOB	6	32780540	32784825	Skin_Not_Sun_Exposed_Suprapubic	5.54701e-05	0.0168775	-0.291856	K562	NA	TRUE	13905	1.721	Spleen	39.32	Muscle_Skeletal	0.1555
rs1015166	6	32798730	TAP2	6	32781544	32806599	Adipose_Subcutaneous	0.000109865	0.0295386	0.158406	KBM7	NA	TRUE	0	10.33	Cells_EBV-transformed_lymphocytes	30.7	Testis	2.31
rs1015166	6	32798730	TAP2	6	32781544	32806599	Breast_Mammary_Tissue	5.90286e-05	0.0177464	0.213453	KBM7	NA	TRUE	0	9.784	Cells_EBV-transformed_lymphocytes	30.7	Testis	2.31
rs1015166	6	32798730	TAP2	6	32781544	32806599	Esophagus_Mucosa	8.07191e-05	0.0231832	0.147848	KBM7	NA	TRUE	0	13.14	Cells_EBV-transformed_lymphocytes	30.7	Testis	2.31
rs1015166	6	32798730	TAP2	6	32781544	32806599	Thyroid	9.50682e-07	0.000473404	0.184648	KBM7	NA	TRUE	0	8.222	Cells_EBV-transformed_lymphocytes	30.7	Testis	2.31
rs10186458	2	20598509	SDC1	2	20400558	20425194	Adrenal_Gland	3.64698e-07	0.000199907	-0.415668	NHEK	NA	TRUE	173315	9.231	Skin_Not_Sun_Exposed_Suprapubic	267.2	Muscle_Skeletal	0.09943
rs10509540	10	90023032	PTEN	10	89622870	89731687	Pancreas	6.80288e-15	1.28619e-11	0.426566	KBM7	NA	TRUE	291345	6.86	Cells_EBV-transformed_lymphocytes	28.7	Brain_Spinal_cord_cervical_c-1	4.325
rs10517086	4	26085510	RBPJ	4	26165077	26436541	Artery_Aorta	1.4774e-05	0.00529755	-0.248538	KBM7	NA	TRUE	79567	11.4	Cells_EBV-transformed_lymphocytes	20.95	Liver	3.312
rs10786436	10	100300181	HPSE2	10	100218875	100995619	Skin_Sun_Exposed_Lower_leg	8.6495e-09	6.70627e-06	-0.246436	KBM7	NA	TRUE	0	0.7258	Cervix_Endocervix	12.57	Cells_Transformed_fibroblasts	0
rs10822050	10	64438770	ADO	10	64564516	64568238	Esophagus_Mucosa	0.000172797	0.0430535	0.134125	HUVEC	NA	TRUE	125746	3.894	Testis	29.22	Whole_Blood	1.401
rs10822050	10	64438770	ADO	10	64564516	64568238	Lung	0.000134433	0.0348454	0.138237	HUVEC	NA	TRUE	125746	4.661	Testis	29.22	Whole_Blood	1.401
rs10822050	10	64438770	ADO	10	64564516	64568238	Muscle_Skeletal	1.11116e-08	8.37645e-06	0.160066	HUVEC	NA	TRUE	125746	3.844	Testis	29.22	Whole_Blood	1.401
rs10822050	10	64438770	ADO	10	64564516	64568238	Testis	0.000101403	0.0278565	-0.121517	HUVEC	NA	TRUE	125746	29.22	Testis	29.22	Whole_Blood	1.401
rs10822050	10	64438770	ADO	10	64564516	64568238	Whole_Blood	3.56563e-05	0.0115022	0.131829	HUVEC	NA	TRUE	125746	1.401	Testis	29.22	Whole_Blood	1.401
rs10988542	9	132657263	USP20	9	132596977	132644107	Skin_Sun_Exposed_Lower_leg	0.000182906	0.0450328	-0.17297	NHEK	NA	TRUE	13156	10.26	Pituitary	20.02	Heart_Left_Ventricle	3.219
rs11052552	12	9855957	CLECL1	12	9868456	9885895	Adipose_Subcutaneous	1.89471e-17	4.78487e-14	0.524463	NHEK	NA	TRUE	12499	0.1472	Cells_EBV-transformed_lymphocytes	21.94	Cells_Transformed_fibroblasts	0
rs11052552	12	9855957	CLECL1	12	9868456	9885895	Adipose_Visceral_Omentum	4.65689e-14	7.87779e-11	0.492079	NHEK	NA	TRUE	12499	0.1776	Cells_EBV-transformed_lymphocytes	21.94	Cells_Transformed_fibroblasts	0
rs11052552	12	9855957	CLECL1	12	9868456	9885895	Adrenal_Gland	1.97417e-11	2.35801e-08	0.60995	NHEK	NA	TRUE	12499	0.1486	Cells_EBV-transformed_lymphocytes	21.94	Cells_Transformed_fibroblasts	0
rs11052552	12	9855957	CLECL1	12	9868456	9885895	Artery_Aorta	1.7554e-12	2.42433e-09	0.485436	NHEK	NA	TRUE	12499	0.08542	Cells_EBV-transformed_lymphocytes	21.94	Cells_Transformed_fibroblasts	0
rs11052552	12	9855957	CLECL1	12	9868456	9885895	Artery_Coronary	1.25714e-05	0.00464922	0.398319	NHEK	NA	TRUE	12499	0.1315	Cells_EBV-transformed_lymphocytes	21.94	Cells_Transformed_fibroblasts	0
rs11052552	12	9855957	CLECL1	12	9868456	9885895	Artery_Tibial	7.18414e-14	1.19248e-10	0.469949	NHEK	NA	TRUE	12499	0.0384	Cells_EBV-transformed_lymphocytes	21.94	Cells_Transformed_fibroblasts	0
rs11052552	12	9855957	CLECL1	12	9868456	9885895	Brain_Anterior_cingulate_cortex_BA24	0.000133348	0.0345897	0.460503	NHEK	NA	TRUE	12499	0.01725	Cells_EBV-transformed_lymphocytes	21.94	Cells_Transformed_fibroblasts	0
rs11052552	12	9855957	CLECL1	12	9868456	9885895	Brain_Caudate_basal_ganglia	7.27082e-09	5.73799e-06	0.567762	NHEK	NA	TRUE	12499	0.06398	Cells_EBV-transformed_lymphocytes	21.94	Cells_Transformed_fibroblasts	0
rs11052552	12	9855957	CLECL1	12	9868456	9885895	Brain_Hippocampus	4.43427e-06	0.00185973	0.509448	NHEK	NA	TRUE	12499	0.06435	Cells_EBV-transformed_lymphocytes	21.94	Cells_Transformed_fibroblasts	0
rs11052552	12	9855957	CLECL1	12	9868456	9885895	Brain_Hypothalamus	1.09745e-08	8.30846e-06	0.63466	NHEK	NA	TRUE	12499	0.06208	Cells_EBV-transformed_lymphocytes	21.94	Cells_Transformed_fibroblasts	0
rs11052552	12	9855957	CLECL1	12	9868456	9885895	Brain_Spinal_cord_cervical_c-1	9.3609e-08	5.81648e-05	0.768286	NHEK	NA	TRUE	12499	0.2088	Cells_EBV-transformed_lymphocytes	21.94	Cells_Transformed_fibroblasts	0
rs11052552	12	9855957	CLECL1	12	9868456	9885895	Colon_Sigmoid	2.33518e-07	0.000134245	0.461456	NHEK	NA	TRUE	12499	0.05984	Cells_EBV-transformed_lymphocytes	21.94	Cells_Transformed_fibroblasts	0
rs11052552	12	9855957	CLECL1	12	9868456	9885895	Esophagus_Gastroesophageal_Junction	1.28663e-06	0.000616385	0.465482	NHEK	NA	TRUE	12499	0.05247	Cells_EBV-transformed_lymphocytes	21.94	Cells_Transformed_fibroblasts	0
rs11052552	12	9855957	CLECL1	12	9868456	9885895	Esophagus_Muscularis	1.312e-09	1.19015e-06	0.44811	NHEK	NA	TRUE	12499	0.06023	Cells_EBV-transformed_lymphocytes	21.94	Cells_Transformed_fibroblasts	0
rs11052552	12	9855957	CLECL1	12	9868456	9885895	Heart_Atrial_Appendage	3.59455e-07	0.000197954	0.378185	NHEK	NA	TRUE	12499	0.0459	Cells_EBV-transformed_lymphocytes	21.94	Cells_Transformed_fibroblasts	0
rs11052552	12	9855957	CLECL1	12	9868456	9885895	Lung	1.36578e-17	3.47392e-14	0.518159	NHEK	NA	TRUE	12499	0.3212	Cells_EBV-transformed_lymphocytes	21.94	Cells_Transformed_fibroblasts	0
rs11052552	12	9855957	CLECL1	12	9868456	9885895	Nerve_Tibial	6.91826e-27	3.54489e-23	0.746486	NHEK	NA	TRUE	12499	0.1738	Cells_EBV-transformed_lymphocytes	21.94	Cells_Transformed_fibroblasts	0
rs11052552	12	9855957	CLECL1	12	9868456	9885895	Pancreas	2.95307e-07	0.000165602	0.474483	NHEK	NA	TRUE	12499	0.03337	Cells_EBV-transformed_lymphocytes	21.94	Cells_Transformed_fibroblasts	0
rs11052552	12	9855957	CLECL1	12	9868456	9885895	Pituitary	4.2779e-05	0.0134681	0.415593	NHEK	NA	TRUE	12499	0.07295	Cells_EBV-transformed_lymphocytes	21.94	Cells_Transformed_fibroblasts	0
rs11052552	12	9855957	CLECL1	12	9868456	9885895	Prostate	1.43848e-05	0.00517902	0.492187	NHEK	NA	TRUE	12499	0.1364	Cells_EBV-transformed_lymphocytes	21.94	Cells_Transformed_fibroblasts	0
rs11052552	12	9855957	CLECL1	12	9868456	9885895	Skin_Not_Sun_Exposed_Suprapubic	1.74037e-09	1.54213e-06	0.446503	NHEK	NA	TRUE	12499	0.06501	Cells_EBV-transformed_lymphocytes	21.94	Cells_Transformed_fibroblasts	0
rs11052552	12	9855957	CLECL1	12	9868456	9885895	Skin_Sun_Exposed_Lower_leg	1.64551e-09	1.47285e-06	0.43305	NHEK	NA	TRUE	12499	0.06361	Cells_EBV-transformed_lymphocytes	21.94	Cells_Transformed_fibroblasts	0
rs11052552	12	9855957	CLECL1	12	9868456	9885895	Spleen	7.31084e-09	5.75673e-06	0.442664	NHEK	NA	TRUE	12499	3.39	Cells_EBV-transformed_lymphocytes	21.94	Cells_Transformed_fibroblasts	0
rs11052552	12	9855957	CLECL1	12	9868456	9885895	Stomach	1.2432e-05	0.00460731	0.326022	NHEK	NA	TRUE	12499	0.1323	Cells_EBV-transformed_lymphocytes	21.94	Cells_Transformed_fibroblasts	0
rs11052552	12	9855957	CLECL1	12	9868456	9885895	Testis	1.52515e-05	0.00545217	0.429929	NHEK	NA	TRUE	12499	0.1685	Cells_EBV-transformed_lymphocytes	21.94	Cells_Transformed_fibroblasts	0
rs11052552	12	9855957	CLECL1	12	9868456	9885895	Thyroid	5.6337e-06	0.00227376	0.231434	NHEK	NA	TRUE	12499	0.09106	Cells_EBV-transformed_lymphocytes	21.94	Cells_Transformed_fibroblasts	0
rs11052552	12	9855957	KLRB1	12	9747147	9760482	Testis	1.98238e-06	0.000913789	-0.459794	HUVEC	NA	TRUE	95475	0.1544	Spleen	15.39	Cells_Transformed_fibroblasts	0
rs11052552	12	9855957	RP11-705C15.2	12	9787188	9811008	Adipose_Subcutaneous	8.15544e-05	0.0233851	-0.181345	NHEK	NA	TRUE	44949	1.598	Cells_EBV-transformed_lymphocytes	5.767	Brain_Cerebellar_Hemisphere	0.1274
rs11052552	12	9855957	RP11-705C15.2	12	9787188	9811008	Adipose_Visceral_Omentum	1.14903e-05	0.00429887	-0.183335	NHEK	NA	TRUE	44949	1.696	Cells_EBV-transformed_lymphocytes	5.767	Brain_Cerebellar_Hemisphere	0.1274
rs11052552	12	9855957	RP11-705C15.2	12	9787188	9811008	Brain_Spinal_cord_cervical_c-1	0.000175635	0.0435457	-0.33228	NHEK	NA	TRUE	44949	0.8225	Cells_EBV-transformed_lymphocytes	5.767	Brain_Cerebellar_Hemisphere	0.1274
rs11052552	12	9855957	RP11-705C15.2	12	9787188	9811008	Cells_Transformed_fibroblasts	1.94659e-05	0.00679389	-0.29325	NHEK	NA	TRUE	44949	1.698	Cells_EBV-transformed_lymphocytes	5.767	Brain_Cerebellar_Hemisphere	0.1274
rs11052552	12	9855957	RP11-705C15.2	12	9787188	9811008	Testis	7.09904e-07	0.000365462	-0.375237	NHEK	NA	TRUE	44949	2.116	Cells_EBV-transformed_lymphocytes	5.767	Brain_Cerebellar_Hemisphere	0.1274
rs11145763	9	139263595	SNAPC4	9	139270029	139293249	Whole_Blood	2.47671e-08	1.71696e-05	0.18796	HUVEC	NA	TRUE	6434	2.317	Testis	21.96	Muscle_Skeletal	2.157
rs11741255	5	131811181	AC034220.3	5	131646978	131705608	Adipose_Subcutaneous	5.05287e-08	3.28998e-05	0.267948	NHEK	NA	TRUE	105573	0.675	Pituitary	6.357	Cells_Transformed_fibroblasts	0.07971
rs11741255	5	131811181	AC034220.3	5	131646978	131705608	Adipose_Visceral_Omentum	1.26044e-08	9.34242e-06	0.240617	NHEK	NA	TRUE	105573	0.8676	Pituitary	6.357	Cells_Transformed_fibroblasts	0.07971
rs11741255	5	131811181	AC034220.3	5	131646978	131705608	Adrenal_Gland	9.19239e-06	0.00350593	0.394803	NHEK	NA	TRUE	105573	1.187	Pituitary	6.357	Cells_Transformed_fibroblasts	0.07971
rs11741255	5	131811181	AC034220.3	5	131646978	131705608	Artery_Aorta	9.3371e-05	0.0259729	0.168846	NHEK	NA	TRUE	105573	0.8104	Pituitary	6.357	Cells_Transformed_fibroblasts	0.07971
rs11741255	5	131811181	AC034220.3	5	131646978	131705608	Brain_Anterior_cingulate_cortex_BA24	1.70341e-05	0.00602245	0.520201	NHEK	NA	TRUE	105573	1.274	Pituitary	6.357	Cells_Transformed_fibroblasts	0.07971
rs11741255	5	131811181	AC034220.3	5	131646978	131705608	Brain_Caudate_basal_ganglia	2.34226e-07	0.000134434	0.614034	NHEK	NA	TRUE	105573	1.539	Pituitary	6.357	Cells_Transformed_fibroblasts	0.07971
rs11741255	5	131811181	AC034220.3	5	131646978	131705608	Brain_Cortex	7.64985e-06	0.00300848	0.570132	NHEK	NA	TRUE	105573	1.365	Pituitary	6.357	Cells_Transformed_fibroblasts	0.07971
rs11741255	5	131811181	AC034220.3	5	131646978	131705608	Brain_Frontal_Cortex_BA9	8.59108e-06	0.00333414	0.532429	NHEK	NA	TRUE	105573	1.275	Pituitary	6.357	Cells_Transformed_fibroblasts	0.07971
rs11741255	5	131811181	AC034220.3	5	131646978	131705608	Brain_Hippocampus	3.14346e-05	0.0103577	0.514557	NHEK	NA	TRUE	105573	1.117	Pituitary	6.357	Cells_Transformed_fibroblasts	0.07971
rs11741255	5	131811181	AC034220.3	5	131646978	131705608	Brain_Hypothalamus	2.9454e-05	0.00976675	0.522777	NHEK	NA	TRUE	105573	1.568	Pituitary	6.357	Cells_Transformed_fibroblasts	0.07971
rs11741255	5	131811181	AC034220.3	5	131646978	131705608	Brain_Nucleus_accumbens_basal_ganglia	1.30505e-08	9.63265e-06	0.599272	NHEK	NA	TRUE	105573	1.851	Pituitary	6.357	Cells_Transformed_fibroblasts	0.07971
rs11741255	5	131811181	AC034220.3	5	131646978	131705608	Brain_Putamen_basal_ganglia	5.70331e-05	0.0172787	0.543085	NHEK	NA	TRUE	105573	1.273	Pituitary	6.357	Cells_Transformed_fibroblasts	0.07971
rs11741255	5	131811181	AC034220.3	5	131646978	131705608	Esophagus_Mucosa	0.000195779	0.0478027	0.163535	NHEK	NA	TRUE	105573	0.5985	Pituitary	6.357	Cells_Transformed_fibroblasts	0.07971
rs11741255	5	131811181	AC034220.3	5	131646978	131705608	Esophagus_Muscularis	1.4074e-06	0.000670607	0.254553	NHEK	NA	TRUE	105573	0.8924	Pituitary	6.357	Cells_Transformed_fibroblasts	0.07971
rs11741255	5	131811181	AC034220.3	5	131646978	131705608	Heart_Atrial_Appendage	1.81518e-16	4.06179e-13	0.454491	NHEK	NA	TRUE	105573	2.024	Pituitary	6.357	Cells_Transformed_fibroblasts	0.07971
rs11741255	5	131811181	AC034220.3	5	131646978	131705608	Heart_Left_Ventricle	2.31164e-11	2.7334e-08	0.4076	NHEK	NA	TRUE	105573	2.058	Pituitary	6.357	Cells_Transformed_fibroblasts	0.07971
rs11741255	5	131811181	AC034220.3	5	131646978	131705608	Minor_Salivary_Gland	0.000105554	0.0288178	0.403516	NHEK	NA	TRUE	105573	1.696	Pituitary	6.357	Cells_Transformed_fibroblasts	0.07971
rs11741255	5	131811181	AC034220.3	5	131646978	131705608	Muscle_Skeletal	1.16074e-16	2.68225e-13	0.31587	NHEK	NA	TRUE	105573	1.934	Pituitary	6.357	Cells_Transformed_fibroblasts	0.07971
rs11741255	5	131811181	AC034220.3	5	131646978	131705608	Nerve_Tibial	0.000129372	0.0337127	0.183236	NHEK	NA	TRUE	105573	1.101	Pituitary	6.357	Cells_Transformed_fibroblasts	0.07971
rs11741255	5	131811181	AC034220.3	5	131646978	131705608	Prostate	1.27317e-05	0.00469869	0.253222	NHEK	NA	TRUE	105573	3.253	Pituitary	6.357	Cells_Transformed_fibroblasts	0.07971
rs11741255	5	131811181	AC034220.3	5	131646978	131705608	Skin_Not_Sun_Exposed_Suprapubic	9.13694e-05	0.0256177	0.188381	NHEK	NA	TRUE	105573	0.6684	Pituitary	6.357	Cells_Transformed_fibroblasts	0.07971
rs11741255	5	131811181	AC034220.3	5	131646978	131705608	Stomach	2.2627e-08	1.57867e-05	0.324075	NHEK	NA	TRUE	105573	0.9497	Pituitary	6.357	Cells_Transformed_fibroblasts	0.07971
rs11741255	5	131811181	AC034220.3	5	131646978	131705608	Testis	3.21387e-07	0.000178941	0.396665	NHEK	NA	TRUE	105573	1.831	Pituitary	6.357	Cells_Transformed_fibroblasts	0.07971
rs11741255	5	131811181	AC034220.3	5	131646978	131705608	Thyroid	2.00102e-07	0.000117324	0.233761	NHEK	NA	TRUE	105573	2.66	Pituitary	6.357	Cells_Transformed_fibroblasts	0.07971
rs11741255	5	131811181	AC116366.6	5	131804582	131808735	Skin_Not_Sun_Exposed_Suprapubic	1.36066e-05	0.00496969	0.218248	NHEK	NA	TRUE	2446	0.8016	Spleen	3.065	Brain_Frontal_Cortex_BA9	0.249
rs11741255	5	131811181	AC116366.6	5	131804582	131808735	Whole_Blood	8.23848e-15	1.50141e-11	0.262744	NHEK	NA	TRUE	2446	2.731	Spleen	3.065	Brain_Frontal_Cortex_BA9	0.249
rs11741255	5	131811181	P4HA2	5	131527531	131631008	Artery_Aorta	1.63891e-08	1.16588e-05	0.261606	IMR90	NA	TRUE	180173	7.339	Cells_Transformed_fibroblasts	14.96	Whole_Blood	0.1228
rs11741255	5	131811181	P4HA2	5	131527531	131631008	Artery_Tibial	7.88054e-15	1.45874e-11	0.211263	IMR90	NA	TRUE	180173	4.763	Cells_Transformed_fibroblasts	14.96	Whole_Blood	0.1228
rs11741255	5	131811181	P4HA2	5	131527531	131631008	Esophagus_Mucosa	1.29297e-17	3.31257e-14	0.383259	IMR90	NA	TRUE	180173	3.338	Cells_Transformed_fibroblasts	14.96	Whole_Blood	0.1228
rs11741255	5	131811181	P4HA2	5	131527531	131631008	Esophagus_Muscularis	0.000155922	0.0395512	0.153128	IMR90	NA	TRUE	180173	3.972	Cells_Transformed_fibroblasts	14.96	Whole_Blood	0.1228
rs11741255	5	131811181	P4HA2	5	131527531	131631008	Nerve_Tibial	8.97943e-14	1.463e-10	0.25854	IMR90	NA	TRUE	180173	3.974	Cells_Transformed_fibroblasts	14.96	Whole_Blood	0.1228
rs11741255	5	131811181	P4HA2	5	131527531	131631008	Ovary	2.29674e-05	0.00783803	0.3225	IMR90	NA	TRUE	180173	1.379	Cells_Transformed_fibroblasts	14.96	Whole_Blood	0.1228
rs11741255	5	131811181	P4HA2	5	131527531	131631008	Pancreas	1.26396e-05	0.00466958	0.280636	IMR90	NA	TRUE	180173	9.942	Cells_Transformed_fibroblasts	14.96	Whole_Blood	0.1228
rs11741255	5	131811181	P4HA2	5	131527531	131631008	Testis	6.51895e-11	7.09168e-08	0.301351	IMR90	NA	TRUE	180173	2.97	Cells_Transformed_fibroblasts	14.96	Whole_Blood	0.1228
rs11741255	5	131811181	P4HA2	5	131527531	131631008	Thyroid	6.45966e-22	2.3069e-18	0.346348	IMR90	NA	TRUE	180173	3.187	Cells_Transformed_fibroblasts	14.96	Whole_Blood	0.1228
rs11741255	5	131811181	SLC22A5	5	131705444	131731306	Adipose_Subcutaneous	2.76888e-06	0.00123138	-0.261244	IMR90	NA	TRUE	79875	2.783	Muscle_Skeletal	23.96	Whole_Blood	0.6842
rs11741255	5	131811181	SLC22A5	5	131705444	131731306	Artery_Tibial	1.18616e-13	1.8976e-10	-0.37262	IMR90	NA	TRUE	79875	2.868	Muscle_Skeletal	23.96	Whole_Blood	0.6842
rs11741255	5	131811181	SLC22A5	5	131705444	131731306	Breast_Mammary_Tissue	3.43782e-06	0.00147685	-0.201556	IMR90	NA	TRUE	79875	5.043	Muscle_Skeletal	23.96	Whole_Blood	0.6842
rs11741255	5	131811181	SLC22A5	5	131705444	131731306	Cells_Transformed_fibroblasts	2.59423e-19	7.77286e-16	-0.456362	IMR90	NA	TRUE	79875	1.273	Muscle_Skeletal	23.96	Whole_Blood	0.6842
rs11741255	5	131811181	SLC22A5	5	131705444	131731306	Esophagus_Mucosa	3.33409e-18	8.79686e-15	-0.324416	IMR90	NA	TRUE	79875	3.274	Muscle_Skeletal	23.96	Whole_Blood	0.6842
rs11741255	5	131811181	SLC22A5	5	131705444	131731306	Lung	9.85835e-13	1.38862e-09	-0.369654	IMR90	NA	TRUE	79875	3.837	Muscle_Skeletal	23.96	Whole_Blood	0.6842
rs11741255	5	131811181	SLC22A5	5	131705444	131731306	Nerve_Tibial	5.71678e-05	0.0172928	-0.191306	IMR90	NA	TRUE	79875	5.273	Muscle_Skeletal	23.96	Whole_Blood	0.6842
rs11741255	5	131811181	SLC22A5	5	131705444	131731306	Pancreas	1.51286e-07	9.08109e-05	-0.301416	IMR90	NA	TRUE	79875	4.985	Muscle_Skeletal	23.96	Whole_Blood	0.6842
rs11741255	5	131811181	SLC22A5	5	131705444	131731306	Skin_Not_Sun_Exposed_Suprapubic	7.87154e-18	2.03139e-14	-0.360235	IMR90	NA	TRUE	79875	6.811	Muscle_Skeletal	23.96	Whole_Blood	0.6842
rs11741255	5	131811181	SLC22A5	5	131705444	131731306	Skin_Sun_Exposed_Lower_leg	6.58634e-28	3.69622e-24	-0.401052	IMR90	NA	TRUE	79875	6.35	Muscle_Skeletal	23.96	Whole_Blood	0.6842
rs11741255	5	131811181	SLC22A5	5	131705444	131731306	Spleen	2.54077e-05	0.00857153	-0.525639	IMR90	NA	TRUE	79875	3.17	Muscle_Skeletal	23.96	Whole_Blood	0.6842
rs11741255	5	131811181	SLC22A5	5	131705444	131731306	Stomach	2.76664e-05	0.00924532	-0.174548	IMR90	NA	TRUE	79875	5.527	Muscle_Skeletal	23.96	Whole_Blood	0.6842
rs11741255	5	131811181	SLC22A5	5	131705444	131731306	Thyroid	1.43456e-08	1.05009e-05	-0.186575	IMR90	NA	TRUE	79875	7.016	Muscle_Skeletal	23.96	Whole_Blood	0.6842
rs11741255	5	131811181	SLC22A5	5	131705444	131731306	Vagina	7.92452e-05	0.0228713	-0.501639	IMR90	NA	TRUE	79875	5.528	Muscle_Skeletal	23.96	Whole_Blood	0.6842
rs11741255	5	131811181	SLC22A5	5	131705444	131731306	Whole_Blood	7.92901e-14	1.30997e-10	-0.398633	IMR90	NA	TRUE	79875	0.6842	Muscle_Skeletal	23.96	Whole_Blood	0.6842
rs12232497	17	38040118	GSDMA	17	38119226	38134019	Adipose_Subcutaneous	4.31412e-11	4.82681e-08	0.436747	NHEK	NA	TRUE	79108	0.3203	Skin_Sun_Exposed_Lower_leg	34.64	Brain_Cerebellar_Hemisphere	0
rs12232497	17	38040118	GSDMA	17	38119226	38134019	Adipose_Visceral_Omentum	3.56963e-11	4.08431e-08	0.423706	NHEK	NA	TRUE	79108	0.3219	Skin_Sun_Exposed_Lower_leg	34.64	Brain_Cerebellar_Hemisphere	0
rs12232497	17	38040118	GSDMA	17	38119226	38134019	Adrenal_Gland	8.26662e-06	0.00322949	0.44277	NHEK	NA	TRUE	79108	0.2021	Skin_Sun_Exposed_Lower_leg	34.64	Brain_Cerebellar_Hemisphere	0
rs12232497	17	38040118	GSDMA	17	38119226	38134019	Artery_Aorta	9.65588e-09	7.45385e-06	0.405508	NHEK	NA	TRUE	79108	0.1106	Skin_Sun_Exposed_Lower_leg	34.64	Brain_Cerebellar_Hemisphere	0
rs12232497	17	38040118	GSDMA	17	38119226	38134019	Artery_Coronary	5.29358e-06	0.00214875	0.506302	NHEK	NA	TRUE	79108	0.1103	Skin_Sun_Exposed_Lower_leg	34.64	Brain_Cerebellar_Hemisphere	0
rs12232497	17	38040118	GSDMA	17	38119226	38134019	Artery_Tibial	2.31319e-10	2.31681e-07	0.385398	NHEK	NA	TRUE	79108	0.04089	Skin_Sun_Exposed_Lower_leg	34.64	Brain_Cerebellar_Hemisphere	0
rs12232497	17	38040118	GSDMA	17	38119226	38134019	Breast_Mammary_Tissue	5.31526e-07	0.000282166	0.427004	NHEK	NA	TRUE	79108	0.1423	Skin_Sun_Exposed_Lower_leg	34.64	Brain_Cerebellar_Hemisphere	0
rs12232497	17	38040118	GSDMA	17	38119226	38134019	Colon_Sigmoid	5.22495e-08	3.38954e-05	0.457104	NHEK	NA	TRUE	79108	0.06304	Skin_Sun_Exposed_Lower_leg	34.64	Brain_Cerebellar_Hemisphere	0
rs12232497	17	38040118	GSDMA	17	38119226	38134019	Esophagus_Gastroesophageal_Junction	8.21687e-05	0.0235231	0.35715	NHEK	NA	TRUE	79108	0.08469	Skin_Sun_Exposed_Lower_leg	34.64	Brain_Cerebellar_Hemisphere	0
rs12232497	17	38040118	GSDMA	17	38119226	38134019	Esophagus_Muscularis	3.76108e-12	4.90679e-09	0.453876	NHEK	NA	TRUE	79108	0.1006	Skin_Sun_Exposed_Lower_leg	34.64	Brain_Cerebellar_Hemisphere	0
rs12232497	17	38040118	GSDMA	17	38119226	38134019	Heart_Left_Ventricle	2.05704e-05	0.00711617	0.364373	NHEK	NA	TRUE	79108	0.0298	Skin_Sun_Exposed_Lower_leg	34.64	Brain_Cerebellar_Hemisphere	0
rs12232497	17	38040118	GSDMA	17	38119226	38134019	Lung	3.19404e-09	2.70807e-06	0.368717	NHEK	NA	TRUE	79108	0.1669	Skin_Sun_Exposed_Lower_leg	34.64	Brain_Cerebellar_Hemisphere	0
rs12232497	17	38040118	GSDMA	17	38119226	38134019	Muscle_Skeletal	3.97866e-08	2.6591e-05	0.331507	NHEK	NA	TRUE	79108	0.01869	Skin_Sun_Exposed_Lower_leg	34.64	Brain_Cerebellar_Hemisphere	0
rs12232497	17	38040118	GSDMA	17	38119226	38134019	Nerve_Tibial	1.55361e-09	1.39412e-06	0.400759	NHEK	NA	TRUE	79108	0.09061	Skin_Sun_Exposed_Lower_leg	34.64	Brain_Cerebellar_Hemisphere	0
rs12232497	17	38040118	GSDMA	17	38119226	38134019	Pancreas	1.45292e-05	0.00522568	0.326463	NHEK	NA	TRUE	79108	0.0206	Skin_Sun_Exposed_Lower_leg	34.64	Brain_Cerebellar_Hemisphere	0
rs12232497	17	38040118	GSDMA	17	38119226	38134019	Thyroid	8.22238e-10	7.65012e-07	0.36073	NHEK	NA	TRUE	79108	0.05418	Skin_Sun_Exposed_Lower_leg	34.64	Brain_Cerebellar_Hemisphere	0
rs12232497	17	38040118	GSDMB	17	38060848	38076107	Cells_EBV-transformed_lymphocytes	9.04355e-07	0.000454172	-0.418045	KBM7	NA	TRUE	20730	10.87	Small_Intestine_Terminal_Ileum	46.19	Muscle_Skeletal	0.9208
rs12232497	17	38040118	GSDMB	17	38060848	38076107	Lung	3.22212e-09	2.72534e-06	-0.165089	KBM7	NA	TRUE	20730	8.785	Small_Intestine_Terminal_Ileum	46.19	Muscle_Skeletal	0.9208
rs12232497	17	38040118	GSDMB	17	38060848	38076107	Small_Intestine_Terminal_Ileum	3.36215e-09	2.81682e-06	-0.298069	KBM7	NA	TRUE	20730	46.19	Small_Intestine_Terminal_Ileum	46.19	Muscle_Skeletal	0.9208
rs12232497	17	38040118	GSDMB	17	38060848	38076107	Spleen	4.60258e-15	8.89211e-12	-0.502122	KBM7	NA	TRUE	20730	14.88	Small_Intestine_Terminal_Ileum	46.19	Muscle_Skeletal	0.9208
rs12232497	17	38040118	GSDMB	17	38060848	38076107	Stomach	4.93236e-08	3.24739e-05	-0.141212	KBM7	NA	TRUE	20730	11.59	Small_Intestine_Terminal_Ileum	46.19	Muscle_Skeletal	0.9208
rs12232497	17	38040118	GSDMB	17	38060848	38076107	Whole_Blood	7.5613e-30	4.86058e-26	-0.308954	KBM7	NA	TRUE	20730	6.049	Small_Intestine_Terminal_Ileum	46.19	Muscle_Skeletal	0.9208
rs12232497	17	38040118	MED24	17	38175350	38217468	Artery_Tibial	3.00411e-06	0.00131939	0.211685	KBM7	NA	TRUE	135232	10.51	Brain_Cerebellum	26.47	Whole_Blood	3.82
rs12232497	17	38040118	ORMDL3	17	38077294	38083854	Adipose_Subcutaneous	1.35798e-08	9.96095e-06	0.137832	HUVEC	NA	TRUE	37176	27.14	Liver	48.61	Muscle_Skeletal	5.835
rs12232497	17	38040118	ORMDL3	17	38077294	38083854	Cells_EBV-transformed_lymphocytes	1.0259e-15	2.09658e-12	-0.718083	HUVEC	NA	TRUE	37176	24.78	Liver	48.61	Muscle_Skeletal	5.835
rs12232497	17	38040118	ORMDL3	17	38077294	38083854	Cells_Transformed_fibroblasts	9.30676e-05	0.0259089	-0.138549	HUVEC	NA	TRUE	37176	10.44	Liver	48.61	Muscle_Skeletal	5.835
rs12232497	17	38040118	ORMDL3	17	38077294	38083854	Esophagus_Mucosa	1.42065e-07	8.55664e-05	-0.156339	HUVEC	NA	TRUE	37176	9.43	Liver	48.61	Muscle_Skeletal	5.835
rs12232497	17	38040118	ORMDL3	17	38077294	38083854	Lung	6.87829e-10	6.43344e-07	-0.191866	HUVEC	NA	TRUE	37176	15.14	Liver	48.61	Muscle_Skeletal	5.835
rs12232497	17	38040118	ORMDL3	17	38077294	38083854	Skin_Sun_Exposed_Lower_leg	0.000131709	0.0342147	-0.119054	HUVEC	NA	TRUE	37176	16.15	Liver	48.61	Muscle_Skeletal	5.835
rs12232497	17	38040118	ORMDL3	17	38077294	38083854	Spleen	5.03865e-20	1.57649e-16	-0.64917	HUVEC	NA	TRUE	37176	17.23	Liver	48.61	Muscle_Skeletal	5.835
rs12232497	17	38040118	ORMDL3	17	38077294	38083854	Whole_Blood	4.06265e-29	2.51993e-25	-0.392715	HUVEC	NA	TRUE	37176	8.136	Liver	48.61	Muscle_Skeletal	5.835
rs12232497	17	38040118	PGAP3	17	37827375	37853050	Heart_Left_Ventricle	3.38179e-06	0.00145988	-0.202558	NHEK	NA	TRUE	187068	4.275	Thyroid	25.04	Muscle_Skeletal	2.49
rs12232497	17	38040118	PGAP3	17	37827375	37853050	Nerve_Tibial	1.60052e-05	0.00570431	-0.14003	NHEK	NA	TRUE	187068	9.82	Thyroid	25.04	Muscle_Skeletal	2.49
rs12232497	17	38040118	PGAP3	17	37827375	37853050	Pancreas	7.93758e-06	0.00311126	-0.20857	NHEK	NA	TRUE	187068	10.26	Thyroid	25.04	Muscle_Skeletal	2.49
rs12232497	17	38040118	PGAP3	17	37827375	37853050	Stomach	1.38718e-05	0.00503535	-0.159112	NHEK	NA	TRUE	187068	9.847	Thyroid	25.04	Muscle_Skeletal	2.49
rs12232497	17	38040118	PGAP3	17	37827375	37853050	Thyroid	1.27922e-10	1.33414e-07	-0.200947	NHEK	NA	TRUE	187068	25.04	Thyroid	25.04	Muscle_Skeletal	2.49
rs12232497	17	38040118	ZPBP2	17	38024417	38034149	Spleen	6.25001e-05	0.0186473	0.380741	KBM7	NA	TRUE	5969	0.09272	Testis	65.25	Adipose_Subcutaneous	0
rs12232497	17	38040118	ZPBP2	17	38024417	38034149	Testis	5.10116e-17	1.25245e-13	-0.267331	KBM7	NA	TRUE	5969	65.25	Testis	65.25	Adipose_Subcutaneous	0
rs12598357	16	28340944	CCDC101	16	28565236	28603111	Artery_Tibial	4.03752e-05	0.0128255	-0.104515	K562	NA	TRUE	224292	14.95	Testis	48.07	Brain_Anterior_cingulate_cortex_BA24	4.119
rs12598357	16	28340944	CCDC101	16	28565236	28603111	Muscle_Skeletal	1.69907e-05	0.00601313	-0.0914161	K562	NA	TRUE	224292	15.82	Testis	48.07	Brain_Anterior_cingulate_cortex_BA24	4.119
rs12598357	16	28340944	CCDC101	16	28565236	28603111	Pancreas	5.13752e-05	0.0157809	-0.203091	K562	NA	TRUE	224292	11.37	Testis	48.07	Brain_Anterior_cingulate_cortex_BA24	4.119
rs12598357	16	28340944	CCDC101	16	28565236	28603111	Pituitary	7.52521e-05	0.0218796	-0.211306	K562	NA	TRUE	224292	9.67	Testis	48.07	Brain_Anterior_cingulate_cortex_BA24	4.119
rs12598357	16	28340944	CCDC101	16	28565236	28603111	Whole_Blood	1.13427e-06	0.000550859	-0.1439	K562	NA	TRUE	224292	11.59	Testis	48.07	Brain_Anterior_cingulate_cortex_BA24	4.119
rs12708716	16	11179872	RMI2	16	11343476	11445619	Thyroid	2.74961e-06	0.00122435	0.268369	KBM7	NA	TRUE	163604	0.3957	Cells_EBV-transformed_lymphocytes	11.46	Brain_Cerebellar_Hemisphere	0.06741
rs1270942	6	31918859	AGER	6	32148745	32152101	Nerve_Tibial	9.53719e-05	0.0264463	0.339222	IMR90	NA	TRUE	229886	7.385	Lung	368	Muscle_Skeletal	0.9236
rs1270942	6	31918859	C2	6	31865562	31913449	Whole_Blood	9.14165e-07	0.000458448	0.324472	KBM7	NA	TRUE	5410	0.8451	Liver	106.4	Cells_EBV-transformed_lymphocytes	0.1176
rs1270942	6	31918859	CCHCR1	6	31110216	31126015	Adipose_Subcutaneous	2.06943e-07	0.000120934	0.404237	HUVEC	NA	TRUE	792844	4.64	Testis	80.52	Whole_Blood	1.892
rs1270942	6	31918859	CCHCR1	6	31110216	31126015	Adipose_Visceral_Omentum	5.39883e-10	5.11735e-07	0.404438	HUVEC	NA	TRUE	792844	3.67	Testis	80.52	Whole_Blood	1.892
rs1270942	6	31918859	CCHCR1	6	31110216	31126015	Artery_Aorta	1.69452e-06	0.000791418	0.40805	HUVEC	NA	TRUE	792844	4.182	Testis	80.52	Whole_Blood	1.892
rs1270942	6	31918859	CCHCR1	6	31110216	31126015	Artery_Tibial	2.94294e-06	0.00130061	0.371639	HUVEC	NA	TRUE	792844	3.413	Testis	80.52	Whole_Blood	1.892
rs1270942	6	31918859	CCHCR1	6	31110216	31126015	Brain_Cerebellar_Hemisphere	2.12888e-07	0.000123795	0.791212	HUVEC	NA	TRUE	792844	8.154	Testis	80.52	Whole_Blood	1.892
rs1270942	6	31918859	CCHCR1	6	31110216	31126015	Brain_Cerebellum	5.16522e-07	0.000274872	0.839696	HUVEC	NA	TRUE	792844	8.115	Testis	80.52	Whole_Blood	1.892
rs1270942	6	31918859	CCHCR1	6	31110216	31126015	Breast_Mammary_Tissue	9.49817e-07	0.000473404	0.357457	HUVEC	NA	TRUE	792844	5.817	Testis	80.52	Whole_Blood	1.892
rs1270942	6	31918859	CCHCR1	6	31110216	31126015	Colon_Sigmoid	1.70886e-06	0.00079706	0.404081	HUVEC	NA	TRUE	792844	5.042	Testis	80.52	Whole_Blood	1.892
rs1270942	6	31918859	CCHCR1	6	31110216	31126015	Esophagus_Gastroesophageal_Junction	1.10945e-05	0.00417285	0.336221	HUVEC	NA	TRUE	792844	4.096	Testis	80.52	Whole_Blood	1.892
rs1270942	6	31918859	CCHCR1	6	31110216	31126015	Esophagus_Muscularis	1.08768e-08	8.25218e-06	0.370701	HUVEC	NA	TRUE	792844	3.695	Testis	80.52	Whole_Blood	1.892
rs1270942	6	31918859	CCHCR1	6	31110216	31126015	Heart_Atrial_Appendage	0.000101519	0.0278667	0.324389	HUVEC	NA	TRUE	792844	2.976	Testis	80.52	Whole_Blood	1.892
rs1270942	6	31918859	CCHCR1	6	31110216	31126015	Liver	8.86163e-06	0.0034058	0.504004	HUVEC	NA	TRUE	792844	2.723	Testis	80.52	Whole_Blood	1.892
rs1270942	6	31918859	CCHCR1	6	31110216	31126015	Lung	9.53615e-11	1.00988e-07	0.446871	HUVEC	NA	TRUE	792844	4.226	Testis	80.52	Whole_Blood	1.892
rs1270942	6	31918859	CCHCR1	6	31110216	31126015	Nerve_Tibial	6.58053e-09	5.24001e-06	0.418239	HUVEC	NA	TRUE	792844	7.375	Testis	80.52	Whole_Blood	1.892
rs1270942	6	31918859	CCHCR1	6	31110216	31126015	Pancreas	3.67967e-05	0.0118054	0.434108	HUVEC	NA	TRUE	792844	3.665	Testis	80.52	Whole_Blood	1.892
rs1270942	6	31918859	CCHCR1	6	31110216	31126015	Small_Intestine_Terminal_Ileum	3.74201e-05	0.0119837	0.536433	HUVEC	NA	TRUE	792844	7.63	Testis	80.52	Whole_Blood	1.892
rs1270942	6	31918859	CCHCR1	6	31110216	31126015	Spleen	5.79521e-05	0.0174971	0.590463	HUVEC	NA	TRUE	792844	6.719	Testis	80.52	Whole_Blood	1.892
rs1270942	6	31918859	CCHCR1	6	31110216	31126015	Thyroid	2.44329e-11	2.86988e-08	0.470036	HUVEC	NA	TRUE	792844	8.436	Testis	80.52	Whole_Blood	1.892
rs1270942	6	31918859	CCHCR1	6	31110216	31126015	Whole_Blood	4.77598e-06	0.00198473	0.307131	HUVEC	NA	TRUE	792844	1.892	Testis	80.52	Whole_Blood	1.892
rs1270942	6	31918859	CLIC1	6	31698358	31707540	Adipose_Subcutaneous	5.09004e-06	0.00208191	-0.215676	KBM7	NA	TRUE	211319	118	Whole_Blood	301.6	Brain_Cerebellar_Hemisphere	2.984
rs1270942	6	31918859	DXO	6	31937587	31940069	Adrenal_Gland	7.19689e-07	0.000369301	0.500828	IMR90	NA	TRUE	18728	20.09	Testis	55.93	Muscle_Skeletal	3.696
rs1270942	6	31918859	HCP5	6	31368479	31445283	Skin_Sun_Exposed_Lower_leg	1.03709e-08	7.93653e-06	-0.386267	KBM7	NA	TRUE	473576	15.29	Cells_EBV-transformed_lymphocytes	50.71	Cells_Transformed_fibroblasts	0.1231
rs1270942	6	31918859	HCP5	6	31368479	31445283	Thyroid	2.11536e-06	0.000970029	-0.366782	KBM7	NA	TRUE	473576	5.525	Cells_EBV-transformed_lymphocytes	50.71	Cells_Transformed_fibroblasts	0.1231
rs1270942	6	31918859	HLA-DMB	6	32902406	32908847	Brain_Cortex	0.000200426	0.0487688	0.567579	K562	NA	TRUE	983547	1.193	Cells_EBV-transformed_lymphocytes	76.61	Cells_Transformed_fibroblasts	0.04358
rs1270942	6	31918859	HLA-DMB	6	32902406	32908847	Cells_Transformed_fibroblasts	4.78462e-09	3.91578e-06	0.897841	K562	NA	TRUE	983547	0.04358	Cells_EBV-transformed_lymphocytes	76.61	Cells_Transformed_fibroblasts	0.04358
rs1270942	6	31918859	HLA-DQB2	6	32723875	32731311	Adipose_Subcutaneous	0.000166651	0.0417872	0.503382	HUVEC	NA	TRUE	805016	0.584	Skin_Not_Sun_Exposed_Suprapubic	16.19	Cells_Transformed_fibroblasts	0
rs1270942	6	31918859	HLA-DQB2	6	32723875	32731311	Adipose_Visceral_Omentum	2.7587e-07	0.000155806	0.694009	HUVEC	NA	TRUE	805016	0.3451	Skin_Not_Sun_Exposed_Suprapubic	16.19	Cells_Transformed_fibroblasts	0
rs1270942	6	31918859	HLA-DQB2	6	32723875	32731311	Adrenal_Gland	4.79399e-06	0.00198936	0.917929	HUVEC	NA	TRUE	805016	0.1785	Skin_Not_Sun_Exposed_Suprapubic	16.19	Cells_Transformed_fibroblasts	0
rs1270942	6	31918859	HLA-DQB2	6	32723875	32731311	Breast_Mammary_Tissue	4.39701e-07	0.000238067	0.805763	HUVEC	NA	TRUE	805016	0.595	Skin_Not_Sun_Exposed_Suprapubic	16.19	Cells_Transformed_fibroblasts	0
rs1270942	6	31918859	HLA-DQB2	6	32723875	32731311	Esophagus_Gastroesophageal_Junction	2.28666e-06	0.00104183	0.74104	HUVEC	NA	TRUE	805016	0.1375	Skin_Not_Sun_Exposed_Suprapubic	16.19	Cells_Transformed_fibroblasts	0
rs1270942	6	31918859	HLA-DQB2	6	32723875	32731311	Esophagus_Muscularis	1.01133e-06	0.000500783	0.683459	HUVEC	NA	TRUE	805016	0.1449	Skin_Not_Sun_Exposed_Suprapubic	16.19	Cells_Transformed_fibroblasts	0
rs1270942	6	31918859	HLA-DQB2	6	32723875	32731311	Heart_Atrial_Appendage	1.2882e-05	0.00474919	0.59724	HUVEC	NA	TRUE	805016	0.09515	Skin_Not_Sun_Exposed_Suprapubic	16.19	Cells_Transformed_fibroblasts	0
rs1270942	6	31918859	HLA-DQB2	6	32723875	32731311	Heart_Left_Ventricle	8.1883e-07	0.000413571	0.664806	HUVEC	NA	TRUE	805016	0.07131	Skin_Not_Sun_Exposed_Suprapubic	16.19	Cells_Transformed_fibroblasts	0
rs1270942	6	31918859	HLA-DQB2	6	32723875	32731311	Muscle_Skeletal	1.10414e-07	6.81278e-05	0.57803	HUVEC	NA	TRUE	805016	0.04229	Skin_Not_Sun_Exposed_Suprapubic	16.19	Cells_Transformed_fibroblasts	0
rs1270942	6	31918859	MSH5	6	31707725	31732622	Artery_Aorta	9.99957e-05	0.0274913	-0.256107	K562	NA	TRUE	186237	1.002	Testis	14.61	Muscle_Skeletal	0.3934
rs1270942	6	31918859	MSH5	6	31707725	31732622	Brain_Putamen_basal_ganglia	1.23572e-06	0.00059752	-0.734093	K562	NA	TRUE	186237	0.811	Testis	14.61	Muscle_Skeletal	0.3934
rs1270942	6	31918859	MSH5	6	31707725	31732622	Thyroid	1.90069e-06	0.000879575	-0.229421	K562	NA	TRUE	186237	2.932	Testis	14.61	Muscle_Skeletal	0.3934
rs1270942	6	31918859	PSORS1C1	6	31082527	31107869	Adipose_Visceral_Omentum	2.69575e-06	0.00120492	-0.475327	KBM7	NA	TRUE	810990	0.3242	Testis	19.81	Whole_Blood	0
rs1270942	6	31918859	PSORS1C1	6	31082527	31107869	Artery_Tibial	2.77595e-05	0.00926765	-0.579512	KBM7	NA	TRUE	810990	0.6428	Testis	19.81	Whole_Blood	0
rs1270942	6	31918859	PSORS1C1	6	31082527	31107869	Brain_Hypothalamus	4.64155e-05	0.0144712	-0.924328	KBM7	NA	TRUE	810990	0.1312	Testis	19.81	Whole_Blood	0
rs1270942	6	31918859	PSORS1C1	6	31082527	31107869	Breast_Mammary_Tissue	1.47402e-05	0.00529605	-0.487282	KBM7	NA	TRUE	810990	0.5638	Testis	19.81	Whole_Blood	0
rs1270942	6	31918859	PSORS1C1	6	31082527	31107869	Colon_Sigmoid	0.00011542	0.0307097	-0.612183	KBM7	NA	TRUE	810990	0.6445	Testis	19.81	Whole_Blood	0
rs1270942	6	31918859	PSORS1C1	6	31082527	31107869	Esophagus_Mucosa	1.58972e-06	0.0007494	-0.641388	KBM7	NA	TRUE	810990	0.4121	Testis	19.81	Whole_Blood	0
rs1270942	6	31918859	PSORS1C1	6	31082527	31107869	Esophagus_Muscularis	1.84826e-05	0.00649562	-0.495095	KBM7	NA	TRUE	810990	0.479	Testis	19.81	Whole_Blood	0
rs1270942	6	31918859	PSORS1C1	6	31082527	31107869	Heart_Atrial_Appendage	1.74633e-08	1.23731e-05	-0.77473	KBM7	NA	TRUE	810990	0.4405	Testis	19.81	Whole_Blood	0
rs1270942	6	31918859	PSORS1C1	6	31082527	31107869	Heart_Left_Ventricle	1.26994e-09	1.1572e-06	-0.858377	KBM7	NA	TRUE	810990	0.3633	Testis	19.81	Whole_Blood	0
rs1270942	6	31918859	PSORS1C1	6	31082527	31107869	Lung	4.08147e-06	0.00172816	-0.565118	KBM7	NA	TRUE	810990	0.8275	Testis	19.81	Whole_Blood	0
rs1270942	6	31918859	PSORS1C1	6	31082527	31107869	Pancreas	0.000173617	0.0431665	-0.513974	KBM7	NA	TRUE	810990	0.09612	Testis	19.81	Whole_Blood	0
rs1270942	6	31918859	PSORS1C1	6	31082527	31107869	Prostate	0.000139753	0.0360394	-0.932955	KBM7	NA	TRUE	810990	0.5412	Testis	19.81	Whole_Blood	0
rs1270942	6	31918859	PSORS1C1	6	31082527	31107869	Stomach	7.57424e-08	4.79051e-05	-0.682486	KBM7	NA	TRUE	810990	0.616	Testis	19.81	Whole_Blood	0
rs1270942	6	31918859	PSORS1C1	6	31082527	31107869	Thyroid	2.89091e-13	4.33089e-10	-0.905665	KBM7	NA	TRUE	810990	1.026	Testis	19.81	Whole_Blood	0
rs1270942	6	31918859	RNF5	6	32146131	32151930	Adrenal_Gland	5.18406e-06	0.00211645	-0.447599	IMR90	NA	TRUE	227272	42.02	Adrenal_Gland	42.02	Pituitary	9.741
rs1270942	6	31918859	RNF5	6	32146131	32151930	Brain_Cerebellum	8.13107e-07	0.000411268	-0.725325	IMR90	NA	TRUE	227272	25.69	Adrenal_Gland	42.02	Pituitary	9.741
rs1270942	6	31918859	RNF5	6	32146131	32151930	Brain_Frontal_Cortex_BA9	3.64302e-05	0.0117198	-0.576955	IMR90	NA	TRUE	227272	24.61	Adrenal_Gland	42.02	Pituitary	9.741
rs1270942	6	31918859	RNF5	6	32146131	32151930	Cells_EBV-transformed_lymphocytes	0.000169801	0.0424567	-0.445899	IMR90	NA	TRUE	227272	38.11	Adrenal_Gland	42.02	Pituitary	9.741
rs1270942	6	31918859	RNF5	6	32146131	32151930	Esophagus_Muscularis	5.69689e-08	3.65545e-05	-0.298197	IMR90	NA	TRUE	227272	32.01	Adrenal_Gland	42.02	Pituitary	9.741
rs1270942	6	31918859	RNF5	6	32146131	32151930	Muscle_Skeletal	7.11915e-15	1.33883e-11	-0.314981	IMR90	NA	TRUE	227272	21.15	Adrenal_Gland	42.02	Pituitary	9.741
rs1270942	6	31918859	RNF5	6	32146131	32151930	Pancreas	3.13267e-08	2.13404e-05	-0.551567	IMR90	NA	TRUE	227272	14.17	Adrenal_Gland	42.02	Pituitary	9.741
rs1270942	6	31918859	RNF5	6	32146131	32151930	Skin_Not_Sun_Exposed_Suprapubic	3.64117e-07	0.000199898	-0.280685	IMR90	NA	TRUE	227272	23.97	Adrenal_Gland	42.02	Pituitary	9.741
rs1270942	6	31918859	RNF5	6	32146131	32151930	Skin_Sun_Exposed_Lower_leg	5.89324e-05	0.0177325	-0.19374	IMR90	NA	TRUE	227272	23.7	Adrenal_Gland	42.02	Pituitary	9.741
rs1270942	6	31918859	RNF5	6	32146131	32151930	Stomach	4.29943e-11	4.82564e-08	-0.594007	IMR90	NA	TRUE	227272	27.59	Adrenal_Gland	42.02	Pituitary	9.741
rs1270942	6	31918859	RNF5	6	32146131	32151930	Thyroid	9.78195e-10	9.02986e-07	-0.372766	IMR90	NA	TRUE	227272	30.74	Adrenal_Gland	42.02	Pituitary	9.741
rs1270942	6	31918859	SKIV2L	6	31926857	31937532	Adipose_Subcutaneous	2.36435e-05	0.00802229	-0.350914	KBM7	NA	TRUE	7998	13.44	Pituitary	27.03	Brain_Amygdala	6.366
rs1270942	6	31918859	SKIV2L	6	31926857	31937532	Artery_Tibial	1.68558e-06	0.000788282	-0.464759	KBM7	NA	TRUE	7998	12.74	Pituitary	27.03	Brain_Amygdala	6.366
rs1270942	6	31918859	SKIV2L	6	31926857	31937532	Esophagus_Gastroesophageal_Junction	8.49598e-05	0.0241267	-0.394597	KBM7	NA	TRUE	7998	14.99	Pituitary	27.03	Brain_Amygdala	6.366
rs1270942	6	31918859	SKIV2L	6	31926857	31937532	Esophagus_Mucosa	4.78525e-05	0.0148147	-0.315126	KBM7	NA	TRUE	7998	12.53	Pituitary	27.03	Brain_Amygdala	6.366
rs1270942	6	31918859	SKIV2L	6	31926857	31937532	Pancreas	8.8751e-05	0.0249429	-0.392284	KBM7	NA	TRUE	7998	9.492	Pituitary	27.03	Brain_Amygdala	6.366
rs1270942	6	31918859	SKIV2L	6	31926857	31937532	Skin_Not_Sun_Exposed_Suprapubic	0.000107799	0.029176	-0.295214	KBM7	NA	TRUE	7998	13.17	Pituitary	27.03	Brain_Amygdala	6.366
rs1270942	6	31918859	SKIV2L	6	31926857	31937532	Skin_Sun_Exposed_Lower_leg	0.000205249	0.0495673	-0.249527	KBM7	NA	TRUE	7998	12.74	Pituitary	27.03	Brain_Amygdala	6.366
rs12928404	16	28847245	APOBR	16	28505970	28510291	Skin_Not_Sun_Exposed_Suprapubic	4.15981e-05	0.0131431	-0.141807	KBM7	NA	TRUE	336954	1.516	Whole_Blood	79.77	Cells_Transformed_fibroblasts	0.02837
rs12928404	16	28847245	ATP2A1	16	28889726	28915830	Muscle_Skeletal	0.000206265	0.0497445	0.0812449	KBM7	NA	TRUE	42481	582.7	Muscle_Skeletal	582.7	Heart_Left_Ventricle	0.1997
rs12928404	16	28847245	ATP2A1	16	28889726	28915830	Pituitary	9.50811e-06	0.00361076	0.406181	KBM7	NA	TRUE	42481	1.19	Muscle_Skeletal	582.7	Heart_Left_Ventricle	0.1997
rs12928404	16	28847245	ATP2A1	16	28889726	28915830	Skin_Not_Sun_Exposed_Suprapubic	0.000125393	0.0327985	0.221596	KBM7	NA	TRUE	42481	0.5683	Muscle_Skeletal	582.7	Heart_Left_Ventricle	0.1997
rs12928404	16	28847245	ATP2A1	16	28889726	28915830	Skin_Sun_Exposed_Lower_leg	0.000206037	0.0497236	0.182636	KBM7	NA	TRUE	42481	0.6435	Muscle_Skeletal	582.7	Heart_Left_Ventricle	0.1997
rs12928404	16	28847245	ATXN2L	16	28834356	28848558	Adipose_Subcutaneous	8.05145e-05	0.023162	-0.115232	KBM7	NA	TRUE	0	29.56	Testis	112.2	Heart_Left_Ventricle	12.6
rs12928404	16	28847245	ATXN2L	16	28834356	28848558	Whole_Blood	0.00014536	0.037322	-0.0738547	KBM7	NA	TRUE	0	15.67	Testis	112.2	Heart_Left_Ventricle	12.6
rs12928404	16	28847245	CCDC101	16	28565236	28603111	Whole_Blood	2.05112e-05	0.00710962	-0.128142	NHEK	NA	TRUE	244134	11.59	Testis	48.07	Brain_Anterior_cingulate_cortex_BA24	4.119
rs12928404	16	28847245	LAT	16	28996147	29002104	Artery_Tibial	5.939e-06	0.00238337	0.139858	HUVEC	NA	TRUE	148902	20.05	Spleen	24.24	Muscle_Skeletal	0.837
rs12928404	16	28847245	LAT	16	28996147	29002104	Brain_Cortex	5.39518e-05	0.0164722	0.267083	HUVEC	NA	TRUE	148902	4.859	Spleen	24.24	Muscle_Skeletal	0.837
rs12928404	16	28847245	LAT	16	28996147	29002104	Cells_Transformed_fibroblasts	1.55471e-07	9.31645e-05	0.202373	HUVEC	NA	TRUE	148902	1.906	Spleen	24.24	Muscle_Skeletal	0.837
rs12928404	16	28847245	LAT	16	28996147	29002104	Esophagus_Muscularis	1.64984e-09	1.47299e-06	0.167945	HUVEC	NA	TRUE	148902	11.83	Spleen	24.24	Muscle_Skeletal	0.837
rs12928404	16	28847245	LAT	16	28996147	29002104	Muscle_Skeletal	4.69776e-08	3.1045e-05	0.2201	HUVEC	NA	TRUE	148902	0.837	Spleen	24.24	Muscle_Skeletal	0.837
rs12928404	16	28847245	NFATC2IP	16	28962128	28978418	Adipose_Subcutaneous	1.1813e-05	0.00441494	0.164483	KBM7	NA	TRUE	114883	11.47	Spleen	24.32	Brain_Putamen_basal_ganglia	3.793
rs12928404	16	28847245	NFATC2IP	16	28962128	28978418	Breast_Mammary_Tissue	5.88835e-07	0.000308421	0.218716	KBM7	NA	TRUE	114883	12.54	Spleen	24.32	Brain_Putamen_basal_ganglia	3.793
rs12928404	16	28847245	NFATC2IP	16	28962128	28978418	Cells_Transformed_fibroblasts	3.24149e-05	0.0106313	0.0923195	KBM7	NA	TRUE	114883	9.452	Spleen	24.32	Brain_Putamen_basal_ganglia	3.793
rs12928404	16	28847245	NFATC2IP	16	28962128	28978418	Pituitary	4.85442e-05	0.0149764	0.237774	KBM7	NA	TRUE	114883	8.636	Spleen	24.32	Brain_Putamen_basal_ganglia	3.793
rs12928404	16	28847245	NFATC2IP	16	28962128	28978418	Skin_Not_Sun_Exposed_Suprapubic	5.26681e-06	0.00214034	0.160723	KBM7	NA	TRUE	114883	11.59	Spleen	24.32	Brain_Putamen_basal_ganglia	3.793
rs12928404	16	28847245	NFATC2IP	16	28962128	28978418	Testis	6.76502e-07	0.000351218	0.220392	KBM7	NA	TRUE	114883	21.45	Spleen	24.32	Brain_Putamen_basal_ganglia	3.793
rs12928404	16	28847245	RABEP2	16	28915742	28947847	Adrenal_Gland	5.36425e-07	0.000283914	0.222497	KBM7	NA	TRUE	68497	10.13	Spleen	20.45	Muscle_Skeletal	1.139
rs12928404	16	28847245	SH2B1	16	28857921	28885526	Adipose_Subcutaneous	1.66105e-10	1.70718e-07	-0.173852	NHEK	NA	TRUE	10676	10.83	Brain_Cerebellum	27.87	Whole_Blood	5.52
rs12928404	16	28847245	SH2B1	16	28857921	28885526	Adipose_Visceral_Omentum	2.65795e-06	0.00119104	-0.116245	NHEK	NA	TRUE	10676	9.583	Brain_Cerebellum	27.87	Whole_Blood	5.52
rs12928404	16	28847245	SH2B1	16	28857921	28885526	Adrenal_Gland	8.7996e-06	0.00340014	-0.182311	NHEK	NA	TRUE	10676	15.7	Brain_Cerebellum	27.87	Whole_Blood	5.52
rs12928404	16	28847245	SH2B1	16	28857921	28885526	Brain_Cerebellum	2.42948e-07	0.000139214	-0.212105	NHEK	NA	TRUE	10676	27.87	Brain_Cerebellum	27.87	Whole_Blood	5.52
rs12928404	16	28847245	SH2B1	16	28857921	28885526	Cells_Transformed_fibroblasts	4.71952e-05	0.0146884	-0.0936398	NHEK	NA	TRUE	10676	8.589	Brain_Cerebellum	27.87	Whole_Blood	5.52
rs12928404	16	28847245	SH2B1	16	28857921	28885526	Esophagus_Gastroesophageal_Junction	0.000148311	0.037997	-0.151651	NHEK	NA	TRUE	10676	14.24	Brain_Cerebellum	27.87	Whole_Blood	5.52
rs12928404	16	28847245	SH2B1	16	28857921	28885526	Esophagus_Mucosa	1.08468e-06	0.000531888	-0.100046	NHEK	NA	TRUE	10676	9.637	Brain_Cerebellum	27.87	Whole_Blood	5.52
rs12928404	16	28847245	SH2B1	16	28857921	28885526	Esophagus_Muscularis	4.5082e-07	0.000243051	-0.108666	NHEK	NA	TRUE	10676	13.49	Brain_Cerebellum	27.87	Whole_Blood	5.52
rs12928404	16	28847245	SH2B1	16	28857921	28885526	Heart_Atrial_Appendage	3.42543e-05	0.0111107	-0.148234	NHEK	NA	TRUE	10676	8.444	Brain_Cerebellum	27.87	Whole_Blood	5.52
rs12928404	16	28847245	SH2B1	16	28857921	28885526	Heart_Left_Ventricle	5.16984e-08	3.35995e-05	-0.173673	NHEK	NA	TRUE	10676	7.14	Brain_Cerebellum	27.87	Whole_Blood	5.52
rs12928404	16	28847245	SH2B1	16	28857921	28885526	Lung	2.79213e-05	0.00931289	-0.084837	NHEK	NA	TRUE	10676	11.54	Brain_Cerebellum	27.87	Whole_Blood	5.52
rs12928404	16	28847245	SH2B1	16	28857921	28885526	Nerve_Tibial	1.25014e-06	0.000602168	-0.125601	NHEK	NA	TRUE	10676	15.59	Brain_Cerebellum	27.87	Whole_Blood	5.52
rs12928404	16	28847245	SH2B1	16	28857921	28885526	Whole_Blood	0.000186909	0.0459224	-0.0866592	NHEK	NA	TRUE	10676	5.52	Brain_Cerebellum	27.87	Whole_Blood	5.52
rs12928404	16	28847245	SULT1A1	16	28616903	28634946	Artery_Aorta	2.71377e-06	0.00121055	-0.256418	KBM7	NA	TRUE	212299	1.744	Liver	37.86	Cells_EBV-transformed_lymphocytes	0.1551
rs12928404	16	28847245	SULT1A1	16	28616903	28634946	Artery_Tibial	6.67837e-05	0.0197554	-0.174306	KBM7	NA	TRUE	212299	1.298	Liver	37.86	Cells_EBV-transformed_lymphocytes	0.1551
rs12928404	16	28847245	SULT1A1	16	28616903	28634946	Brain_Caudate_basal_ganglia	8.30637e-05	0.0237409	-0.358889	KBM7	NA	TRUE	212299	10.28	Liver	37.86	Cells_EBV-transformed_lymphocytes	0.1551
rs12928404	16	28847245	SULT1A1	16	28616903	28634946	Brain_Cortex	1.33204e-05	0.00488535	-0.434904	KBM7	NA	TRUE	212299	12.07	Liver	37.86	Cells_EBV-transformed_lymphocytes	0.1551
rs12928404	16	28847245	SULT1A1	16	28616903	28634946	Brain_Hippocampus	0.000175044	0.0434498	-0.336698	KBM7	NA	TRUE	212299	8.509	Liver	37.86	Cells_EBV-transformed_lymphocytes	0.1551
rs12928404	16	28847245	SULT1A1	16	28616903	28634946	Cells_Transformed_fibroblasts	2.6811e-06	0.00119989	-0.197562	KBM7	NA	TRUE	212299	0.2812	Liver	37.86	Cells_EBV-transformed_lymphocytes	0.1551
rs12928404	16	28847245	SULT1A1	16	28616903	28634946	Colon_Sigmoid	2.49286e-06	0.00112562	-0.330995	KBM7	NA	TRUE	212299	2.487	Liver	37.86	Cells_EBV-transformed_lymphocytes	0.1551
rs12928404	16	28847245	SULT1A1	16	28616903	28634946	Esophagus_Gastroesophageal_Junction	0.00012239	0.032244	-0.262974	KBM7	NA	TRUE	212299	2.854	Liver	37.86	Cells_EBV-transformed_lymphocytes	0.1551
rs12928404	16	28847245	SULT1A1	16	28616903	28634946	Esophagus_Mucosa	3.51105e-10	3.41968e-07	-0.331105	KBM7	NA	TRUE	212299	2.52	Liver	37.86	Cells_EBV-transformed_lymphocytes	0.1551
rs12928404	16	28847245	SULT1A1	16	28616903	28634946	Esophagus_Muscularis	1.08125e-05	0.00407545	-0.229227	KBM7	NA	TRUE	212299	2.701	Liver	37.86	Cells_EBV-transformed_lymphocytes	0.1551
rs12928404	16	28847245	SULT1A1	16	28616903	28634946	Heart_Atrial_Appendage	2.6325e-05	0.00885529	-0.28296	KBM7	NA	TRUE	212299	6.126	Liver	37.86	Cells_EBV-transformed_lymphocytes	0.1551
rs12928404	16	28847245	SULT1A1	16	28616903	28634946	Lung	7.1037e-07	0.000365462	-0.263066	KBM7	NA	TRUE	212299	16.39	Liver	37.86	Cells_EBV-transformed_lymphocytes	0.1551
rs12928404	16	28847245	SULT1A1	16	28616903	28634946	Muscle_Skeletal	1.78564e-09	1.57044e-06	-0.242074	KBM7	NA	TRUE	212299	1.509	Liver	37.86	Cells_EBV-transformed_lymphocytes	0.1551
rs12928404	16	28847245	SULT1A1	16	28616903	28634946	Nerve_Tibial	1.09465e-12	1.52971e-09	-0.408196	KBM7	NA	TRUE	212299	6.868	Liver	37.86	Cells_EBV-transformed_lymphocytes	0.1551
rs12928404	16	28847245	SULT1A1	16	28616903	28634946	Pancreas	2.56584e-05	0.00863963	-0.292205	KBM7	NA	TRUE	212299	5.021	Liver	37.86	Cells_EBV-transformed_lymphocytes	0.1551
rs12928404	16	28847245	SULT1A1	16	28616903	28634946	Pituitary	4.68858e-08	3.10424e-05	-0.477731	KBM7	NA	TRUE	212299	15.2	Liver	37.86	Cells_EBV-transformed_lymphocytes	0.1551
rs12928404	16	28847245	SULT1A1	16	28616903	28634946	Prostate	0.000142745	0.0367305	-0.342991	KBM7	NA	TRUE	212299	5.444	Liver	37.86	Cells_EBV-transformed_lymphocytes	0.1551
rs12928404	16	28847245	SULT1A1	16	28616903	28634946	Skin_Sun_Exposed_Lower_leg	4.22454e-05	0.0133357	-0.185908	KBM7	NA	TRUE	212299	1.455	Liver	37.86	Cells_EBV-transformed_lymphocytes	0.1551
rs12928404	16	28847245	SULT1A1	16	28616903	28634946	Stomach	7.7965e-09	6.0984e-06	-0.288799	KBM7	NA	TRUE	212299	7.08	Liver	37.86	Cells_EBV-transformed_lymphocytes	0.1551
rs12928404	16	28847245	SULT1A1	16	28616903	28634946	Thyroid	9.00644e-15	1.63295e-11	-0.420155	KBM7	NA	TRUE	212299	18.97	Liver	37.86	Cells_EBV-transformed_lymphocytes	0.1551
rs12928404	16	28847245	SULT1A1	16	28616903	28634946	Whole_Blood	4.95523e-06	0.00203951	-0.201105	KBM7	NA	TRUE	212299	15.31	Liver	37.86	Cells_EBV-transformed_lymphocytes	0.1551
rs12928404	16	28847245	TUFM	16	28853732	28857729	Adipose_Subcutaneous	3.47222e-19	1.03161e-15	0.250877	KBM7	NA	TRUE	6487	52.74	Adrenal_Gland	90.34	Whole_Blood	27.05
rs12928404	16	28847245	TUFM	16	28853732	28857729	Adipose_Visceral_Omentum	1.18848e-09	1.08576e-06	0.126568	KBM7	NA	TRUE	6487	52.47	Adrenal_Gland	90.34	Whole_Blood	27.05
rs12928404	16	28847245	TUFM	16	28853732	28857729	Artery_Aorta	1.67612e-24	6.89065e-21	0.400009	KBM7	NA	TRUE	6487	41.64	Adrenal_Gland	90.34	Whole_Blood	27.05
rs12928404	16	28847245	TUFM	16	28853732	28857729	Artery_Coronary	7.00303e-07	0.00036251	0.215074	KBM7	NA	TRUE	6487	44.82	Adrenal_Gland	90.34	Whole_Blood	27.05
rs12928404	16	28847245	TUFM	16	28853732	28857729	Artery_Tibial	5.26726e-37	4.77502e-33	0.347865	KBM7	NA	TRUE	6487	38.61	Adrenal_Gland	90.34	Whole_Blood	27.05
rs12928404	16	28847245	TUFM	16	28853732	28857729	Brain_Amygdala	1.99031e-07	0.000117085	0.285785	KBM7	NA	TRUE	6487	39.3	Adrenal_Gland	90.34	Whole_Blood	27.05
rs12928404	16	28847245	TUFM	16	28853732	28857729	Brain_Caudate_basal_ganglia	9.07241e-08	5.6671e-05	0.227433	KBM7	NA	TRUE	6487	43.47	Adrenal_Gland	90.34	Whole_Blood	27.05
rs12928404	16	28847245	TUFM	16	28853732	28857729	Brain_Cortex	1.91165e-05	0.00667854	0.228736	KBM7	NA	TRUE	6487	48.3	Adrenal_Gland	90.34	Whole_Blood	27.05
rs12928404	16	28847245	TUFM	16	28853732	28857729	Brain_Frontal_Cortex_BA9	3.85951e-06	0.00164205	0.264133	KBM7	NA	TRUE	6487	47.1	Adrenal_Gland	90.34	Whole_Blood	27.05
rs12928404	16	28847245	TUFM	16	28853732	28857729	Brain_Hippocampus	1.76008e-09	1.55571e-06	0.371271	KBM7	NA	TRUE	6487	37.24	Adrenal_Gland	90.34	Whole_Blood	27.05
rs12928404	16	28847245	TUFM	16	28853732	28857729	Brain_Nucleus_accumbens_basal_ganglia	3.61054e-10	3.50692e-07	0.344085	KBM7	NA	TRUE	6487	44.7	Adrenal_Gland	90.34	Whole_Blood	27.05
rs12928404	16	28847245	TUFM	16	28853732	28857729	Brain_Putamen_basal_ganglia	7.16584e-09	5.6678e-06	0.286339	KBM7	NA	TRUE	6487	41.47	Adrenal_Gland	90.34	Whole_Blood	27.05
rs12928404	16	28847245	TUFM	16	28853732	28857729	Breast_Mammary_Tissue	1.50834e-08	1.09055e-05	0.156325	KBM7	NA	TRUE	6487	56.25	Adrenal_Gland	90.34	Whole_Blood	27.05
rs12928404	16	28847245	TUFM	16	28853732	28857729	Cells_EBV-transformed_lymphocytes	6.50536e-05	0.0192952	0.193567	KBM7	NA	TRUE	6487	85.2	Adrenal_Gland	90.34	Whole_Blood	27.05
rs12928404	16	28847245	TUFM	16	28853732	28857729	Cells_Transformed_fibroblasts	3.32492e-08	2.25631e-05	0.108363	KBM7	NA	TRUE	6487	68.48	Adrenal_Gland	90.34	Whole_Blood	27.05
rs12928404	16	28847245	TUFM	16	28853732	28857729	Colon_Sigmoid	4.01243e-15	7.79455e-12	0.317225	KBM7	NA	TRUE	6487	49.52	Adrenal_Gland	90.34	Whole_Blood	27.05
rs12928404	16	28847245	TUFM	16	28853732	28857729	Esophagus_Gastroesophageal_Junction	1.49633e-13	2.35125e-10	0.311733	KBM7	NA	TRUE	6487	46.59	Adrenal_Gland	90.34	Whole_Blood	27.05
rs12928404	16	28847245	TUFM	16	28853732	28857729	Esophagus_Mucosa	2.99525e-16	6.57752e-13	0.192231	KBM7	NA	TRUE	6487	71.67	Adrenal_Gland	90.34	Whole_Blood	27.05
rs12928404	16	28847245	TUFM	16	28853732	28857729	Esophagus_Muscularis	1.82591e-20	5.92253e-17	0.274983	KBM7	NA	TRUE	6487	47.01	Adrenal_Gland	90.34	Whole_Blood	27.05
rs12928404	16	28847245	TUFM	16	28853732	28857729	Lung	2.63637e-23	1.02428e-19	0.222122	KBM7	NA	TRUE	6487	56.24	Adrenal_Gland	90.34	Whole_Blood	27.05
rs12928404	16	28847245	TUFM	16	28853732	28857729	Muscle_Skeletal	2.03967e-07	0.000119393	0.11855	KBM7	NA	TRUE	6487	76.53	Adrenal_Gland	90.34	Whole_Blood	27.05
rs12928404	16	28847245	TUFM	16	28853732	28857729	Nerve_Tibial	7.84074e-25	3.3399e-21	0.259972	KBM7	NA	TRUE	6487	51.64	Adrenal_Gland	90.34	Whole_Blood	27.05
rs12928404	16	28847245	TUFM	16	28853732	28857729	Ovary	1.05973e-11	1.29197e-08	0.491581	KBM7	NA	TRUE	6487	54.81	Adrenal_Gland	90.34	Whole_Blood	27.05
rs12928404	16	28847245	TUFM	16	28853732	28857729	Pancreas	1.40752e-19	4.32726e-16	0.437486	KBM7	NA	TRUE	6487	52.78	Adrenal_Gland	90.34	Whole_Blood	27.05
rs12928404	16	28847245	TUFM	16	28853732	28857729	Pituitary	5.07126e-06	0.00207759	0.229411	KBM7	NA	TRUE	6487	58.24	Adrenal_Gland	90.34	Whole_Blood	27.05
rs12928404	16	28847245	TUFM	16	28853732	28857729	Prostate	1.39389e-05	0.00505452	0.257591	KBM7	NA	TRUE	6487	60.37	Adrenal_Gland	90.34	Whole_Blood	27.05
rs12928404	16	28847245	TUFM	16	28853732	28857729	Skin_Not_Sun_Exposed_Suprapubic	1.88818e-19	5.70573e-16	0.260074	KBM7	NA	TRUE	6487	56.27	Adrenal_Gland	90.34	Whole_Blood	27.05
rs12928404	16	28847245	TUFM	16	28853732	28857729	Skin_Sun_Exposed_Lower_leg	2.49241e-44	2.75375e-40	0.309707	KBM7	NA	TRUE	6487	60.24	Adrenal_Gland	90.34	Whole_Blood	27.05
rs12928404	16	28847245	TUFM	16	28853732	28857729	Small_Intestine_Terminal_Ileum	3.81451e-08	2.56394e-05	0.165596	KBM7	NA	TRUE	6487	69.23	Adrenal_Gland	90.34	Whole_Blood	27.05
rs12928404	16	28847245	TUFM	16	28853732	28857729	Spleen	1.93549e-10	1.95514e-07	0.345725	KBM7	NA	TRUE	6487	68.4	Adrenal_Gland	90.34	Whole_Blood	27.05
rs12928404	16	28847245	TUFM	16	28853732	28857729	Stomach	5.91842e-08	3.78386e-05	0.128678	KBM7	NA	TRUE	6487	73.14	Adrenal_Gland	90.34	Whole_Blood	27.05
rs12928404	16	28847245	TUFM	16	28853732	28857729	Testis	5.37859e-09	4.36151e-06	0.270862	KBM7	NA	TRUE	6487	89.73	Adrenal_Gland	90.34	Whole_Blood	27.05
rs12928404	16	28847245	TUFM	16	28853732	28857729	Thyroid	5.72257e-30	3.74673e-26	0.276299	KBM7	NA	TRUE	6487	63.29	Adrenal_Gland	90.34	Whole_Blood	27.05
rs12928404	16	28847245	TUFM	16	28853732	28857729	Uterus	7.07534e-09	5.60876e-06	0.420973	KBM7	NA	TRUE	6487	56.24	Adrenal_Gland	90.34	Whole_Blood	27.05
rs12928404	16	28847245	TUFM	16	28853732	28857729	Vagina	3.78497e-06	0.00161812	0.238993	KBM7	NA	TRUE	6487	51.81	Adrenal_Gland	90.34	Whole_Blood	27.05
rs12928404	16	28847245	TUFM	16	28853732	28857729	Whole_Blood	3.09984e-66	5.4798e-62	0.536955	KBM7	NA	TRUE	6487	27.05	Adrenal_Gland	90.34	Whole_Blood	27.05
rs1326934	10	97284080	SORBS1	10	97071528	97321171	Esophagus_Mucosa	1.58276e-05	0.00564672	0.0814656	KBM7	NA	TRUE	0	13.65	Esophagus_Muscularis	168	Whole_Blood	0.1645
rs1332099	10	101298450	RP11-129J12.1	10	101286838	101288018	Colon_Sigmoid	5.13018e-05	0.0157721	-0.3454	NHEK	NA	TRUE	10432	0.4666	Spleen	0.6063	Adipose_Subcutaneous	0
rs1332099	10	101298450	RP11-129J12.1	10	101286838	101288018	Small_Intestine_Terminal_Ileum	3.24615e-05	0.0106366	-0.491127	NHEK	NA	TRUE	10432	0.3407	Spleen	0.6063	Adipose_Subcutaneous	0
rs1332099	10	101298450	RP11-129J12.1	10	101286838	101288018	Spleen	3.52542e-05	0.0114037	-0.409698	NHEK	NA	TRUE	10432	0.6063	Spleen	0.6063	Adipose_Subcutaneous	0
rs1689510	12	56396767	SUOX	12	56390964	56400425	Adrenal_Gland	0.000151876	0.0387419	-0.221473	NHEK	NA	TRUE	0	14.34	Liver	15	Whole_Blood	1.77
rs1689510	12	56396767	SUOX	12	56390964	56400425	Artery_Aorta	6.80011e-10	6.39414e-07	-0.266149	NHEK	NA	TRUE	0	5.949	Liver	15	Whole_Blood	1.77
rs1689510	12	56396767	SUOX	12	56390964	56400425	Artery_Tibial	3.86404e-13	5.69226e-10	-0.3033	NHEK	NA	TRUE	0	5.421	Liver	15	Whole_Blood	1.77
rs1689510	12	56396767	SUOX	12	56390964	56400425	Brain_Amygdala	5.50887e-06	0.00222846	-0.489945	NHEK	NA	TRUE	0	4.282	Liver	15	Whole_Blood	1.77
rs1689510	12	56396767	SUOX	12	56390964	56400425	Brain_Anterior_cingulate_cortex_BA24	3.09158e-05	0.0102125	-0.328528	NHEK	NA	TRUE	0	5.235	Liver	15	Whole_Blood	1.77
rs1689510	12	56396767	SUOX	12	56390964	56400425	Brain_Caudate_basal_ganglia	6.71854e-05	0.0198112	-0.272181	NHEK	NA	TRUE	0	5.157	Liver	15	Whole_Blood	1.77
rs1689510	12	56396767	SUOX	12	56390964	56400425	Brain_Cerebellar_Hemisphere	1.11283e-06	0.000541935	-0.418282	NHEK	NA	TRUE	0	3.808	Liver	15	Whole_Blood	1.77
rs1689510	12	56396767	SUOX	12	56390964	56400425	Brain_Cerebellum	1.94844e-14	3.49684e-11	-0.58251	NHEK	NA	TRUE	0	4.61	Liver	15	Whole_Blood	1.77
rs1689510	12	56396767	SUOX	12	56390964	56400425	Brain_Cortex	2.92944e-05	0.00973414	-0.325333	NHEK	NA	TRUE	0	5.717	Liver	15	Whole_Blood	1.77
rs1689510	12	56396767	SUOX	12	56390964	56400425	Brain_Hippocampus	4.61572e-06	0.00192668	-0.456331	NHEK	NA	TRUE	0	4.062	Liver	15	Whole_Blood	1.77
rs1689510	12	56396767	SUOX	12	56390964	56400425	Brain_Hypothalamus	4.27785e-05	0.0134681	-0.441372	NHEK	NA	TRUE	0	4.458	Liver	15	Whole_Blood	1.77
rs1689510	12	56396767	SUOX	12	56390964	56400425	Cells_Transformed_fibroblasts	6.16043e-06	0.00246943	-0.17856	NHEK	NA	TRUE	0	3.019	Liver	15	Whole_Blood	1.77
rs1689510	12	56396767	SUOX	12	56390964	56400425	Colon_Sigmoid	1.20865e-08	9.00164e-06	-0.309118	NHEK	NA	TRUE	0	7.714	Liver	15	Whole_Blood	1.77
rs1689510	12	56396767	SUOX	12	56390964	56400425	Esophagus_Gastroesophageal_Junction	3.07894e-13	4.57382e-10	-0.411816	NHEK	NA	TRUE	0	6.901	Liver	15	Whole_Blood	1.77
rs1689510	12	56396767	SUOX	12	56390964	56400425	Esophagus_Muscularis	1.03672e-12	1.4545e-09	-0.355197	NHEK	NA	TRUE	0	6.875	Liver	15	Whole_Blood	1.77
rs1689510	12	56396767	SUOX	12	56390964	56400425	Heart_Atrial_Appendage	5.34875e-07	0.000283518	-0.158106	NHEK	NA	TRUE	0	5.514	Liver	15	Whole_Blood	1.77
rs1689510	12	56396767	SUOX	12	56390964	56400425	Heart_Left_Ventricle	1.04544e-06	0.000514789	-0.14025	NHEK	NA	TRUE	0	6.718	Liver	15	Whole_Blood	1.77
rs1689510	12	56396767	SUOX	12	56390964	56400425	Liver	4.61903e-05	0.0144137	-0.253951	NHEK	NA	TRUE	0	15	Liver	15	Whole_Blood	1.77
rs1689510	12	56396767	SUOX	12	56390964	56400425	Lung	4.96041e-11	5.49771e-08	-0.213806	NHEK	NA	TRUE	0	5.751	Liver	15	Whole_Blood	1.77
rs1689510	12	56396767	SUOX	12	56390964	56400425	Muscle_Skeletal	3.80548e-05	0.0121649	-0.0831005	NHEK	NA	TRUE	0	4.522	Liver	15	Whole_Blood	1.77
rs1689510	12	56396767	SUOX	12	56390964	56400425	Nerve_Tibial	1.12233e-24	4.72385e-21	-0.595174	NHEK	NA	TRUE	0	7.405	Liver	15	Whole_Blood	1.77
rs1689510	12	56396767	SUOX	12	56390964	56400425	Pancreas	4.05811e-11	4.57278e-08	-0.473633	NHEK	NA	TRUE	0	4.142	Liver	15	Whole_Blood	1.77
rs1689510	12	56396767	SUOX	12	56390964	56400425	Pituitary	3.36314e-08	2.27351e-05	-0.435064	NHEK	NA	TRUE	0	8.247	Liver	15	Whole_Blood	1.77
rs1689510	12	56396767	SUOX	12	56390964	56400425	Prostate	4.32288e-05	0.0135734	-0.255576	NHEK	NA	TRUE	0	9.733	Liver	15	Whole_Blood	1.77
rs1689510	12	56396767	SUOX	12	56390964	56400425	Skin_Not_Sun_Exposed_Suprapubic	9.85405e-16	2.02554e-12	-0.316126	NHEK	NA	TRUE	0	3.427	Liver	15	Whole_Blood	1.77
rs1689510	12	56396767	SUOX	12	56390964	56400425	Skin_Sun_Exposed_Lower_leg	9.99184e-28	5.35249e-24	-0.392141	NHEK	NA	TRUE	0	3.292	Liver	15	Whole_Blood	1.77
rs1689510	12	56396767	SUOX	12	56390964	56400425	Spleen	2.29245e-08	1.59548e-05	-0.567994	NHEK	NA	TRUE	0	6.098	Liver	15	Whole_Blood	1.77
rs1689510	12	56396767	SUOX	12	56390964	56400425	Stomach	5.97261e-08	3.80475e-05	-0.283546	NHEK	NA	TRUE	0	7.679	Liver	15	Whole_Blood	1.77
rs1689510	12	56396767	SUOX	12	56390964	56400425	Testis	3.96629e-11	4.49453e-08	-0.347694	NHEK	NA	TRUE	0	3.972	Liver	15	Whole_Blood	1.77
rs1689510	12	56396767	SUOX	12	56390964	56400425	Thyroid	4.30677e-23	1.63728e-19	-0.497049	NHEK	NA	TRUE	0	8.985	Liver	15	Whole_Blood	1.77
rs1689510	12	56396767	SUOX	12	56390964	56400425	Whole_Blood	1.2183e-10	1.27436e-07	-0.196842	NHEK	NA	TRUE	0	1.77	Liver	15	Whole_Blood	1.77
rs16956936	17	7633691	KCNAB3	17	7825177	7833121	Thyroid	4.33113e-05	0.0135873	0.269666	NHEK	NA	TRUE	191486	1.669	Brain_Cerebellum	25.13	Muscle_Skeletal	0.1053
rs1701704	12	56412486	IKZF4	12	56401443	56432219	Cells_EBV-transformed_lymphocytes	9.76293e-06	0.00369563	-0.541121	KBM7	NA	TRUE	0	1.657	Ovary	5.669	Whole_Blood	0.2808
rs1701704	12	56412486	RAB5B	12	56367697	56388490	Muscle_Skeletal	2.43829e-48	3.07881e-44	-0.406221	NHEK	NA	TRUE	23996	15.88	Artery_Tibial	28.12	Liver	4.96
rs1701704	12	56412486	SUOX	12	56390964	56400425	Artery_Aorta	3.70417e-10	3.57819e-07	-0.271613	KBM7	NA	TRUE	12061	5.949	Liver	15	Whole_Blood	1.77
rs1701704	12	56412486	SUOX	12	56390964	56400425	Artery_Tibial	5.7356e-13	8.34502e-10	-0.294855	KBM7	NA	TRUE	12061	5.421	Liver	15	Whole_Blood	1.77
rs1701704	12	56412486	SUOX	12	56390964	56400425	Brain_Amygdala	1.47761e-06	0.00070217	-0.52002	KBM7	NA	TRUE	12061	4.282	Liver	15	Whole_Blood	1.77
rs1701704	12	56412486	SUOX	12	56390964	56400425	Brain_Anterior_cingulate_cortex_BA24	8.9528e-06	0.00342935	-0.337928	KBM7	NA	TRUE	12061	5.235	Liver	15	Whole_Blood	1.77
rs1701704	12	56412486	SUOX	12	56390964	56400425	Brain_Caudate_basal_ganglia	4.77563e-05	0.0148109	-0.271284	KBM7	NA	TRUE	12061	5.157	Liver	15	Whole_Blood	1.77
rs1701704	12	56412486	SUOX	12	56390964	56400425	Brain_Cerebellar_Hemisphere	1.08337e-06	0.000531888	-0.403607	KBM7	NA	TRUE	12061	3.808	Liver	15	Whole_Blood	1.77
rs1701704	12	56412486	SUOX	12	56390964	56400425	Brain_Cerebellum	1.30055e-13	2.06195e-10	-0.560296	KBM7	NA	TRUE	12061	4.61	Liver	15	Whole_Blood	1.77
rs1701704	12	56412486	SUOX	12	56390964	56400425	Brain_Cortex	4.01304e-06	0.00170327	-0.358867	KBM7	NA	TRUE	12061	5.717	Liver	15	Whole_Blood	1.77
rs1701704	12	56412486	SUOX	12	56390964	56400425	Brain_Hippocampus	7.04076e-06	0.0027853	-0.452093	KBM7	NA	TRUE	12061	4.062	Liver	15	Whole_Blood	1.77
rs1701704	12	56412486	SUOX	12	56390964	56400425	Brain_Hypothalamus	8.8547e-06	0.0034058	-0.466017	KBM7	NA	TRUE	12061	4.458	Liver	15	Whole_Blood	1.77
rs1701704	12	56412486	SUOX	12	56390964	56400425	Cells_Transformed_fibroblasts	4.39166e-06	0.00184624	-0.179622	KBM7	NA	TRUE	12061	3.019	Liver	15	Whole_Blood	1.77
rs1701704	12	56412486	SUOX	12	56390964	56400425	Colon_Sigmoid	5.91015e-09	4.74898e-06	-0.31317	KBM7	NA	TRUE	12061	7.714	Liver	15	Whole_Blood	1.77
rs1701704	12	56412486	SUOX	12	56390964	56400425	Esophagus_Gastroesophageal_Junction	7.29284e-13	1.04813e-09	-0.397094	KBM7	NA	TRUE	12061	6.901	Liver	15	Whole_Blood	1.77
rs1701704	12	56412486	SUOX	12	56390964	56400425	Esophagus_Mucosa	0.000102698	0.0281248	-0.167943	KBM7	NA	TRUE	12061	7.292	Liver	15	Whole_Blood	1.77
rs1701704	12	56412486	SUOX	12	56390964	56400425	Esophagus_Muscularis	2.3841e-12	3.20496e-09	-0.347702	KBM7	NA	TRUE	12061	6.875	Liver	15	Whole_Blood	1.77
rs1701704	12	56412486	SUOX	12	56390964	56400425	Heart_Atrial_Appendage	3.7365e-06	0.00160127	-0.145117	KBM7	NA	TRUE	12061	5.514	Liver	15	Whole_Blood	1.77
rs1701704	12	56412486	SUOX	12	56390964	56400425	Heart_Left_Ventricle	4.37648e-06	0.00184204	-0.129835	KBM7	NA	TRUE	12061	6.718	Liver	15	Whole_Blood	1.77
rs1701704	12	56412486	SUOX	12	56390964	56400425	Liver	4.24564e-05	0.0133903	-0.251711	KBM7	NA	TRUE	12061	15	Liver	15	Whole_Blood	1.77
rs1701704	12	56412486	SUOX	12	56390964	56400425	Lung	7.36215e-11	7.91159e-08	-0.208656	KBM7	NA	TRUE	12061	5.751	Liver	15	Whole_Blood	1.77
rs1701704	12	56412486	SUOX	12	56390964	56400425	Muscle_Skeletal	1.311e-05	0.00482821	-0.0868501	KBM7	NA	TRUE	12061	4.522	Liver	15	Whole_Blood	1.77
rs1701704	12	56412486	SUOX	12	56390964	56400425	Nerve_Tibial	4.92906e-24	1.97832e-20	-0.584806	KBM7	NA	TRUE	12061	7.405	Liver	15	Whole_Blood	1.77
rs1701704	12	56412486	SUOX	12	56390964	56400425	Pancreas	4.06121e-11	4.57278e-08	-0.467479	KBM7	NA	TRUE	12061	4.142	Liver	15	Whole_Blood	1.77
rs1701704	12	56412486	SUOX	12	56390964	56400425	Pituitary	4.95893e-08	3.25277e-05	-0.423334	KBM7	NA	TRUE	12061	8.247	Liver	15	Whole_Blood	1.77
rs1701704	12	56412486	SUOX	12	56390964	56400425	Prostate	2.67288e-05	0.00896589	-0.260946	KBM7	NA	TRUE	12061	9.733	Liver	15	Whole_Blood	1.77
rs1701704	12	56412486	SUOX	12	56390964	56400425	Skin_Not_Sun_Exposed_Suprapubic	1.03495e-16	2.4073e-13	-0.323071	KBM7	NA	TRUE	12061	3.427	Liver	15	Whole_Blood	1.77
rs1701704	12	56412486	SUOX	12	56390964	56400425	Skin_Sun_Exposed_Lower_leg	1.31193e-26	6.53291e-23	-0.383568	KBM7	NA	TRUE	12061	3.292	Liver	15	Whole_Blood	1.77
rs1701704	12	56412486	SUOX	12	56390964	56400425	Small_Intestine_Terminal_Ileum	0.000135979	0.0351945	-0.305236	KBM7	NA	TRUE	12061	6.454	Liver	15	Whole_Blood	1.77
rs1701704	12	56412486	SUOX	12	56390964	56400425	Spleen	4.94207e-08	3.24774e-05	-0.545401	KBM7	NA	TRUE	12061	6.098	Liver	15	Whole_Blood	1.77
rs1701704	12	56412486	SUOX	12	56390964	56400425	Stomach	1.81996e-07	0.000107781	-0.266015	KBM7	NA	TRUE	12061	7.679	Liver	15	Whole_Blood	1.77
rs1701704	12	56412486	SUOX	12	56390964	56400425	Testis	1.74275e-11	2.09233e-08	-0.350379	KBM7	NA	TRUE	12061	3.972	Liver	15	Whole_Blood	1.77
rs1701704	12	56412486	SUOX	12	56390964	56400425	Thyroid	7.08749e-23	2.63769e-19	-0.486974	KBM7	NA	TRUE	12061	8.985	Liver	15	Whole_Blood	1.77
rs1701704	12	56412486	SUOX	12	56390964	56400425	Whole_Blood	5.06881e-12	6.56445e-09	-0.206935	KBM7	NA	TRUE	12061	1.77	Liver	15	Whole_Blood	1.77
rs17388568	4	123329361	KIAA1109	4	123073488	123283913	Brain_Amygdala	7.42173e-05	0.0217037	-0.43693	NHEK	NA	TRUE	45448	6.228	Pituitary	14.51	Whole_Blood	1.74
rs17388568	4	123329361	KIAA1109	4	123073488	123283913	Brain_Caudate_basal_ganglia	2.30606e-05	0.00785468	-0.333442	NHEK	NA	TRUE	45448	7.782	Pituitary	14.51	Whole_Blood	1.74
rs17388568	4	123329361	KIAA1109	4	123073488	123283913	Brain_Cortex	3.32897e-07	0.000184767	-0.480857	NHEK	NA	TRUE	45448	7.754	Pituitary	14.51	Whole_Blood	1.74
rs17388568	4	123329361	KIAA1109	4	123073488	123283913	Cells_Transformed_fibroblasts	0.000114582	0.0305932	-0.0988141	NHEK	NA	TRUE	45448	5.66	Pituitary	14.51	Whole_Blood	1.74
rs17388568	4	123329361	KIAA1109	4	123073488	123283913	Esophagus_Gastroesophageal_Junction	0.000163956	0.0412283	-0.180289	NHEK	NA	TRUE	45448	7.634	Pituitary	14.51	Whole_Blood	1.74
rs17388568	4	123329361	KIAA1109	4	123073488	123283913	Muscle_Skeletal	0.000206422	0.0497486	-0.120239	NHEK	NA	TRUE	45448	3.853	Pituitary	14.51	Whole_Blood	1.74
rs17466626	12	40760630	LRRK2	12	40590546	40763087	Nerve_Tibial	9.56176e-05	0.0264936	0.529374	KBM7	NA	TRUE	0	5.703	Lung	14.84	Testis	0.5492
rs17696736	12	112486817	ALDH2	12	112204691	112247782	Esophagus_Mucosa	5.78345e-05	0.0174765	0.178785	K562	NA	TRUE	239035	82.84	Liver	439.5	Cells_EBV-transformed_lymphocytes	10.46
rs17696736	12	112486817	ALDH2	12	112204691	112247782	Esophagus_Muscularis	0.000203847	0.0493381	0.118412	K562	NA	TRUE	239035	133.5	Liver	439.5	Cells_EBV-transformed_lymphocytes	10.46
rs17696736	12	112486817	ALDH2	12	112204691	112247782	Skin_Not_Sun_Exposed_Suprapubic	4.44889e-09	3.64947e-06	0.248446	K562	NA	TRUE	239035	117.5	Liver	439.5	Cells_EBV-transformed_lymphocytes	10.46
rs17696736	12	112486817	ALDH2	12	112204691	112247782	Skin_Sun_Exposed_Lower_leg	1.17416e-07	7.20531e-05	0.163295	K562	NA	TRUE	239035	138	Liver	439.5	Cells_EBV-transformed_lymphocytes	10.46
rs17885785	11	2167849	IGF2-AS	11	2161731	2169894	Brain_Putamen_basal_ganglia	2.97939e-05	0.00986305	0.536936	KBM7	NA	TRUE	0	0.05962	Nerve_Tibial	0.8458	Cells_EBV-transformed_lymphocytes	0
rs17885785	11	2167849	IGF2-AS	11	2161731	2169894	Liver	1.0949e-05	0.00412253	0.538625	KBM7	NA	TRUE	0	0.5799	Nerve_Tibial	0.8458	Cells_EBV-transformed_lymphocytes	0
rs1980493	6	32363214	ATF6B	6	32065953	32096030	Muscle_Skeletal	1.377e-05	0.00500351	-0.183315	IMR90	NA	TRUE	267184	7.505	Spleen	53.3	Muscle_Skeletal	7.505
rs1980493	6	32363214	C2	6	31865562	31913449	Whole_Blood	3.43414e-06	0.00147685	0.24189	NHEK	NA	TRUE	449765	0.8451	Liver	106.4	Cells_EBV-transformed_lymphocytes	0.1176
rs1980493	6	32363214	GPANK1	6	31629006	31634060	Muscle_Skeletal	0.000106458	0.028975	-0.152376	KBM7	NA	TRUE	729154	4.52	Testis	20.32	Brain_Hippocampus	2.839
rs1980493	6	32363214	HLA-DMA	6	32916390	32936871	Artery_Tibial	1.67637e-05	0.00594468	0.189482	K562	NA	TRUE	553176	8.271	Cells_EBV-transformed_lymphocytes	97.49	Brain_Cerebellum	1.812
rs1980493	6	32363214	HLA-DMA	6	32916390	32936871	Cells_Transformed_fibroblasts	2.82054e-07	0.000158792	0.411138	K562	NA	TRUE	553176	1.885	Cells_EBV-transformed_lymphocytes	97.49	Brain_Cerebellum	1.812
rs1980493	6	32363214	HLA-DMA	6	32916390	32936871	Esophagus_Gastroesophageal_Junction	0.00010582	0.0288681	0.269829	K562	NA	TRUE	553176	9.043	Cells_EBV-transformed_lymphocytes	97.49	Brain_Cerebellum	1.812
rs1980493	6	32363214	HLA-DMA	6	32916390	32936871	Esophagus_Mucosa	1.2515e-05	0.0046332	0.241353	K562	NA	TRUE	553176	7.45	Cells_EBV-transformed_lymphocytes	97.49	Brain_Cerebellum	1.812
rs1980493	6	32363214	HLA-DMA	6	32916390	32936871	Heart_Left_Ventricle	7.74405e-05	0.0224421	0.280391	K562	NA	TRUE	553176	4.989	Cells_EBV-transformed_lymphocytes	97.49	Brain_Cerebellum	1.812
rs1980493	6	32363214	HLA-DMA	6	32916390	32936871	Liver	2.84645e-09	2.43674e-06	0.727192	K562	NA	TRUE	553176	4.545	Cells_EBV-transformed_lymphocytes	97.49	Brain_Cerebellum	1.812
rs1980493	6	32363214	HLA-DMA	6	32916390	32936871	Muscle_Skeletal	2.53423e-06	0.00113993	0.276754	K562	NA	TRUE	553176	3.023	Cells_EBV-transformed_lymphocytes	97.49	Brain_Cerebellum	1.812
rs1980493	6	32363214	HLA-DMA	6	32916390	32936871	Pancreas	1.69541e-09	1.50987e-06	0.554411	K562	NA	TRUE	553176	5.881	Cells_EBV-transformed_lymphocytes	97.49	Brain_Cerebellum	1.812
rs1980493	6	32363214	HLA-DMA	6	32916390	32936871	Skin_Not_Sun_Exposed_Suprapubic	1.14345e-05	0.00428252	0.294485	K562	NA	TRUE	553176	13.16	Cells_EBV-transformed_lymphocytes	97.49	Brain_Cerebellum	1.812
rs1980493	6	32363214	HLA-DMA	6	32916390	32936871	Skin_Sun_Exposed_Lower_leg	1.31182e-07	7.94175e-05	0.292007	K562	NA	TRUE	553176	14.85	Cells_EBV-transformed_lymphocytes	97.49	Brain_Cerebellum	1.812
rs1980493	6	32363214	HLA-DMA	6	32916390	32936871	Thyroid	3.15482e-10	3.0812e-07	0.437175	K562	NA	TRUE	553176	20.24	Cells_EBV-transformed_lymphocytes	97.49	Brain_Cerebellum	1.812
rs1980493	6	32363214	HLA-DOB	6	32780540	32784825	Lung	2.77562e-06	0.00123283	0.406837	NHEK	NA	TRUE	417326	2.841	Spleen	39.32	Muscle_Skeletal	0.1555
rs1980493	6	32363214	HLA-DQA2	6	32709119	32714992	Artery_Tibial	1.18766e-05	0.004434	-0.465544	NHEK	NA	TRUE	345905	0.654	Cells_EBV-transformed_lymphocytes	43.27	Cells_Transformed_fibroblasts	0
rs1980493	6	32363214	HLA-DQA2	6	32709119	32714992	Muscle_Skeletal	8.0049e-07	0.000406632	-0.45775	NHEK	NA	TRUE	345905	0.1375	Cells_EBV-transformed_lymphocytes	43.27	Cells_Transformed_fibroblasts	0
rs1980493	6	32363214	HLA-DQA2	6	32709119	32714992	Testis	4.80155e-05	0.0148392	-0.580193	NHEK	NA	TRUE	345905	0.3147	Cells_EBV-transformed_lymphocytes	43.27	Cells_Transformed_fibroblasts	0
rs1980493	6	32363214	HLA-DQA2	6	32709119	32714992	Whole_Blood	1.83485e-06	0.000850218	-0.488554	NHEK	NA	TRUE	345905	1.408	Cells_EBV-transformed_lymphocytes	43.27	Cells_Transformed_fibroblasts	0
rs1980493	6	32363214	HLA-DQB1	6	32627244	32636160	Spleen	0.000164464	0.0413268	-0.578546	KBM7	NA	TRUE	264030	30.85	Cells_EBV-transformed_lymphocytes	69.61	Cells_Transformed_fibroblasts	0.0253
rs1980493	6	32363214	HLA-DQB2	6	32723875	32731311	Adipose_Visceral_Omentum	0.000188644	0.0462522	0.413202	KBM7	NA	TRUE	360661	0.3451	Skin_Not_Sun_Exposed_Suprapubic	16.19	Cells_Transformed_fibroblasts	0
rs1980493	6	32363214	NOTCH4	6	32162620	32191844	Adipose_Subcutaneous	2.89123e-09	2.46909e-06	-0.290323	KBM7	NA	TRUE	171370	23.51	Adipose_Visceral_Omentum	27.93	Cells_Transformed_fibroblasts	0.1083
rs1980493	6	32363214	NOTCH4	6	32162620	32191844	Adipose_Visceral_Omentum	3.02979e-09	2.58118e-06	-0.31577	KBM7	NA	TRUE	171370	27.93	Adipose_Visceral_Omentum	27.93	Cells_Transformed_fibroblasts	0.1083
rs1980493	6	32363214	NOTCH4	6	32162620	32191844	Artery_Aorta	6.19083e-07	0.000323619	-0.360784	KBM7	NA	TRUE	171370	2.862	Adipose_Visceral_Omentum	27.93	Cells_Transformed_fibroblasts	0.1083
rs1980493	6	32363214	NOTCH4	6	32162620	32191844	Brain_Cerebellum	0.000155231	0.0394837	-0.382591	KBM7	NA	TRUE	171370	2.784	Adipose_Visceral_Omentum	27.93	Cells_Transformed_fibroblasts	0.1083
rs1980493	6	32363214	NOTCH4	6	32162620	32191844	Esophagus_Mucosa	7.38544e-07	0.000377879	-0.329505	KBM7	NA	TRUE	171370	3.349	Adipose_Visceral_Omentum	27.93	Cells_Transformed_fibroblasts	0.1083
rs1980493	6	32363214	NOTCH4	6	32162620	32191844	Heart_Left_Ventricle	7.76595e-07	0.00039563	-0.261177	KBM7	NA	TRUE	171370	8.828	Adipose_Visceral_Omentum	27.93	Cells_Transformed_fibroblasts	0.1083
rs1980493	6	32363214	NOTCH4	6	32162620	32191844	Lung	3.83945e-06	0.00163548	-0.254303	KBM7	NA	TRUE	171370	25.18	Adipose_Visceral_Omentum	27.93	Cells_Transformed_fibroblasts	0.1083
rs1980493	6	32363214	NOTCH4	6	32162620	32191844	Muscle_Skeletal	1.95119e-07	0.000114975	-0.270568	KBM7	NA	TRUE	171370	3.395	Adipose_Visceral_Omentum	27.93	Cells_Transformed_fibroblasts	0.1083
rs1980493	6	32363214	NOTCH4	6	32162620	32191844	Skin_Sun_Exposed_Lower_leg	5.03911e-08	3.28998e-05	-0.228038	KBM7	NA	TRUE	171370	3.454	Adipose_Visceral_Omentum	27.93	Cells_Transformed_fibroblasts	0.1083
rs1980493	6	32363214	NOTCH4	6	32162620	32191844	Stomach	5.87321e-05	0.0176952	-0.339288	KBM7	NA	TRUE	171370	4.375	Adipose_Visceral_Omentum	27.93	Cells_Transformed_fibroblasts	0.1083
rs1980493	6	32363214	NOTCH4	6	32162620	32191844	Thyroid	2.37031e-06	0.00107716	-0.266094	KBM7	NA	TRUE	171370	13.47	Adipose_Visceral_Omentum	27.93	Cells_Transformed_fibroblasts	0.1083
rs1980493	6	32363214	NOTCH4	6	32162620	32191844	Vagina	1.95618e-05	0.00682064	-0.617619	KBM7	NA	TRUE	171370	6.383	Adipose_Visceral_Omentum	27.93	Cells_Transformed_fibroblasts	0.1083
rs2153977	1	114080070	MAGI3	1	113933371	114228545	Artery_Tibial	2.94342e-05	0.00976675	-0.184305	KBM7	NA	TRUE	0	1.933	Thyroid	4.876	Whole_Blood	0.145
rs2153977	1	114080070	MAGI3	1	113933371	114228545	Muscle_Skeletal	7.61154e-05	0.0221124	-0.185546	KBM7	NA	TRUE	0	0.4482	Thyroid	4.876	Whole_Blood	0.145
rs2153977	1	114080070	PHTF1	1	114239453	114302111	Brain_Cerebellar_Hemisphere	8.64081e-05	0.0244203	-0.279093	NHEK	NA	TRUE	159383	13.1	Brain_Cerebellum	13.19	Skin_Not_Sun_Exposed_Suprapubic	0.5632
rs2153977	1	114080070	PHTF1	1	114239453	114302111	Cells_Transformed_fibroblasts	6.82148e-06	0.00270984	-0.201528	NHEK	NA	TRUE	159383	2.358	Brain_Cerebellum	13.19	Skin_Not_Sun_Exposed_Suprapubic	0.5632
rs2165738	2	24692808	ADCY3	2	25042038	25142708	Artery_Tibial	6.53146e-07	0.000340091	-0.213784	KBM7	NA	TRUE	349230	14.01	Nerve_Tibial	37.1	Liver	0.6665
rs2165738	2	24692808	ADCY3	2	25042038	25142708	Whole_Blood	2.12293e-08	1.49218e-05	-0.371898	KBM7	NA	TRUE	349230	1.635	Nerve_Tibial	37.1	Liver	0.6665
rs2165738	2	24692808	DNAJC27	2	25166505	25194963	Whole_Blood	0.00015883	0.0401393	-0.19281	HUVEC	NA	TRUE	473697	0.4252	Testis	11.95	Whole_Blood	0.4252
rs2251396	6	31364706	CCHCR1	6	31110216	31126015	Colon_Sigmoid	6.22358e-05	0.0185842	0.221135	KBM7	NA	TRUE	238691	5.042	Testis	80.52	Whole_Blood	1.892
rs2251396	6	31364706	CCHCR1	6	31110216	31126015	Thyroid	6.03554e-05	0.0181145	0.183079	KBM7	NA	TRUE	238691	8.436	Testis	80.52	Whole_Blood	1.892
rs2251396	6	31364706	MICA	6	31371356	31383092	Adipose_Subcutaneous	4.85922e-16	1.03494e-12	0.442646	NHEK	NA	TRUE	6650	20.62	Ovary	32.65	Brain_Hypothalamus	2.918
rs2251396	6	31364706	MICA	6	31371356	31383092	Adipose_Visceral_Omentum	2.80614e-11	3.26355e-08	0.322638	NHEK	NA	TRUE	6650	16.1	Ovary	32.65	Brain_Hypothalamus	2.918
rs2251396	6	31364706	MICA	6	31371356	31383092	Adrenal_Gland	2.17017e-07	0.000125988	0.466583	NHEK	NA	TRUE	6650	20.69	Ovary	32.65	Brain_Hypothalamus	2.918
rs2251396	6	31364706	MICA	6	31371356	31383092	Artery_Aorta	3.98642e-12	5.18166e-09	0.409728	NHEK	NA	TRUE	6650	27.11	Ovary	32.65	Brain_Hypothalamus	2.918
rs2251396	6	31364706	MICA	6	31371356	31383092	Artery_Coronary	2.67985e-07	0.000152081	0.441869	NHEK	NA	TRUE	6650	23.41	Ovary	32.65	Brain_Hypothalamus	2.918
rs2251396	6	31364706	MICA	6	31371356	31383092	Artery_Tibial	6.59783e-16	1.39682e-12	0.476143	NHEK	NA	TRUE	6650	26.33	Ovary	32.65	Brain_Hypothalamus	2.918
rs2251396	6	31364706	MICA	6	31371356	31383092	Brain_Amygdala	0.000204267	0.0493975	0.483989	NHEK	NA	TRUE	6650	3.367	Ovary	32.65	Brain_Hypothalamus	2.918
rs2251396	6	31364706	MICA	6	31371356	31383092	Brain_Anterior_cingulate_cortex_BA24	1.16174e-08	8.7205e-06	0.537732	NHEK	NA	TRUE	6650	3.447	Ovary	32.65	Brain_Hypothalamus	2.918
rs2251396	6	31364706	MICA	6	31371356	31383092	Brain_Caudate_basal_ganglia	1.48362e-06	0.000703133	0.455266	NHEK	NA	TRUE	6650	4.698	Ovary	32.65	Brain_Hypothalamus	2.918
rs2251396	6	31364706	MICA	6	31371356	31383092	Brain_Cortex	6.82237e-09	5.42038e-06	0.500866	NHEK	NA	TRUE	6650	3.525	Ovary	32.65	Brain_Hypothalamus	2.918
rs2251396	6	31364706	MICA	6	31371356	31383092	Brain_Frontal_Cortex_BA9	8.93667e-07	0.000449443	0.418125	NHEK	NA	TRUE	6650	2.942	Ovary	32.65	Brain_Hypothalamus	2.918
rs2251396	6	31364706	MICA	6	31371356	31383092	Brain_Hippocampus	1.77178e-07	0.000105103	0.5601	NHEK	NA	TRUE	6650	2.991	Ovary	32.65	Brain_Hypothalamus	2.918
rs2251396	6	31364706	MICA	6	31371356	31383092	Brain_Hypothalamus	6.86552e-05	0.0202109	0.369258	NHEK	NA	TRUE	6650	2.918	Ovary	32.65	Brain_Hypothalamus	2.918
rs2251396	6	31364706	MICA	6	31371356	31383092	Brain_Nucleus_accumbens_basal_ganglia	1.31181e-08	9.66238e-06	0.504239	NHEK	NA	TRUE	6650	3.773	Ovary	32.65	Brain_Hypothalamus	2.918
rs2251396	6	31364706	MICA	6	31371356	31383092	Brain_Putamen_basal_ganglia	1.25216e-06	0.000602321	0.586222	NHEK	NA	TRUE	6650	4.086	Ovary	32.65	Brain_Hypothalamus	2.918
rs2251396	6	31364706	MICA	6	31371356	31383092	Brain_Spinal_cord_cervical_c-1	5.24715e-05	0.0161037	0.435381	NHEK	NA	TRUE	6650	3.115	Ovary	32.65	Brain_Hypothalamus	2.918
rs2251396	6	31364706	MICA	6	31371356	31383092	Breast_Mammary_Tissue	1.00921e-08	7.77366e-06	0.356428	NHEK	NA	TRUE	6650	21.41	Ovary	32.65	Brain_Hypothalamus	2.918
rs2251396	6	31364706	MICA	6	31371356	31383092	Cells_Transformed_fibroblasts	3.1136e-14	5.50411e-11	0.583631	NHEK	NA	TRUE	6650	15.31	Ovary	32.65	Brain_Hypothalamus	2.918
rs2251396	6	31364706	MICA	6	31371356	31383092	Colon_Sigmoid	3.03889e-07	0.000170001	0.375583	NHEK	NA	TRUE	6650	24.84	Ovary	32.65	Brain_Hypothalamus	2.918
rs2251396	6	31364706	MICA	6	31371356	31383092	Esophagus_Gastroesophageal_Junction	8.60201e-08	5.4115e-05	0.368165	NHEK	NA	TRUE	6650	21.07	Ovary	32.65	Brain_Hypothalamus	2.918
rs2251396	6	31364706	MICA	6	31371356	31383092	Esophagus_Mucosa	2.16773e-10	2.18349e-07	0.336448	NHEK	NA	TRUE	6650	10.19	Ovary	32.65	Brain_Hypothalamus	2.918
rs2251396	6	31364706	MICA	6	31371356	31383092	Esophagus_Muscularis	4.17331e-18	1.09295e-14	0.475064	NHEK	NA	TRUE	6650	19.35	Ovary	32.65	Brain_Hypothalamus	2.918
rs2251396	6	31364706	MICA	6	31371356	31383092	Heart_Atrial_Appendage	3.9258e-16	8.5152e-13	0.504213	NHEK	NA	TRUE	6650	12.34	Ovary	32.65	Brain_Hypothalamus	2.918
rs2251396	6	31364706	MICA	6	31371356	31383092	Heart_Left_Ventricle	1.13459e-09	1.04192e-06	0.403948	NHEK	NA	TRUE	6650	8.048	Ovary	32.65	Brain_Hypothalamus	2.918
rs2251396	6	31364706	MICA	6	31371356	31383092	Liver	2.43214e-06	0.00110242	0.361438	NHEK	NA	TRUE	6650	8.31	Ovary	32.65	Brain_Hypothalamus	2.918
rs2251396	6	31364706	MICA	6	31371356	31383092	Lung	2.06522e-16	4.56353e-13	0.400998	NHEK	NA	TRUE	6650	28.02	Ovary	32.65	Brain_Hypothalamus	2.918
rs2251396	6	31364706	MICA	6	31371356	31383092	Minor_Salivary_Gland	7.71009e-07	0.000393351	0.599194	NHEK	NA	TRUE	6650	14.06	Ovary	32.65	Brain_Hypothalamus	2.918
rs2251396	6	31364706	MICA	6	31371356	31383092	Muscle_Skeletal	2.3711e-09	2.04466e-06	0.321827	NHEK	NA	TRUE	6650	3.198	Ovary	32.65	Brain_Hypothalamus	2.918
rs2251396	6	31364706	MICA	6	31371356	31383092	Nerve_Tibial	2.99342e-15	5.91248e-12	0.460151	NHEK	NA	TRUE	6650	26.63	Ovary	32.65	Brain_Hypothalamus	2.918
rs2251396	6	31364706	MICA	6	31371356	31383092	Pancreas	6.96347e-11	7.52892e-08	0.596122	NHEK	NA	TRUE	6650	8.755	Ovary	32.65	Brain_Hypothalamus	2.918
rs2251396	6	31364706	MICA	6	31371356	31383092	Pituitary	3.09325e-10	3.03785e-07	0.490558	NHEK	NA	TRUE	6650	6.64	Ovary	32.65	Brain_Hypothalamus	2.918
rs2251396	6	31364706	MICA	6	31371356	31383092	Prostate	1.5038e-08	1.08949e-05	0.517766	NHEK	NA	TRUE	6650	23.41	Ovary	32.65	Brain_Hypothalamus	2.918
rs2251396	6	31364706	MICA	6	31371356	31383092	Skin_Not_Sun_Exposed_Suprapubic	9.37027e-16	1.93736e-12	0.35418	NHEK	NA	TRUE	6650	12.97	Ovary	32.65	Brain_Hypothalamus	2.918
rs2251396	6	31364706	MICA	6	31371356	31383092	Skin_Sun_Exposed_Lower_leg	7.03936e-19	2.0234e-15	0.455327	NHEK	NA	TRUE	6650	13.25	Ovary	32.65	Brain_Hypothalamus	2.918
rs2251396	6	31364706	MICA	6	31371356	31383092	Small_Intestine_Terminal_Ileum	2.34708e-08	1.63029e-05	0.60823	NHEK	NA	TRUE	6650	15.93	Ovary	32.65	Brain_Hypothalamus	2.918
rs2251396	6	31364706	MICA	6	31371356	31383092	Spleen	1.73182e-09	1.53842e-06	0.626137	NHEK	NA	TRUE	6650	19.16	Ovary	32.65	Brain_Hypothalamus	2.918
rs2251396	6	31364706	MICA	6	31371356	31383092	Stomach	1.76537e-13	2.73751e-10	0.530278	NHEK	NA	TRUE	6650	12.54	Ovary	32.65	Brain_Hypothalamus	2.918
rs2251396	6	31364706	MICA	6	31371356	31383092	Testis	4.38862e-14	7.4957e-11	0.515034	NHEK	NA	TRUE	6650	15.93	Ovary	32.65	Brain_Hypothalamus	2.918
rs2251396	6	31364706	MICA	6	31371356	31383092	Thyroid	2.89966e-17	7.2708e-14	0.46567	NHEK	NA	TRUE	6650	22.55	Ovary	32.65	Brain_Hypothalamus	2.918
rs2251396	6	31364706	MICA	6	31371356	31383092	Uterus	5.37137e-05	0.0164137	0.363363	NHEK	NA	TRUE	6650	26.92	Ovary	32.65	Brain_Hypothalamus	2.918
rs2251396	6	31364706	MICA	6	31371356	31383092	Whole_Blood	2.67176e-10	2.65339e-07	0.305487	NHEK	NA	TRUE	6650	5.58	Ovary	32.65	Brain_Hypothalamus	2.918
rs2251396	6	31364706	MICB	6	31462658	31478901	Brain_Cerebellar_Hemisphere	0.000149353	0.0382024	0.504566	K562	NA	TRUE	97952	1.602	Cells_EBV-transformed_lymphocytes	12.96	Muscle_Skeletal	0.182
rs2251396	6	31364706	MICB	6	31462658	31478901	Esophagus_Mucosa	1.10331e-06	0.000539528	0.335755	K562	NA	TRUE	97952	0.7851	Cells_EBV-transformed_lymphocytes	12.96	Muscle_Skeletal	0.182
rs2251396	6	31364706	MICB	6	31462658	31478901	Stomach	1.20445e-05	0.00448251	0.284187	K562	NA	TRUE	97952	0.7296	Cells_EBV-transformed_lymphocytes	12.96	Muscle_Skeletal	0.182
rs2251396	6	31364706	NOTCH4	6	32162620	32191844	Skin_Sun_Exposed_Lower_leg	3.30786e-05	0.0107933	-0.135025	KBM7	NA	TRUE	797914	3.454	Adipose_Visceral_Omentum	27.93	Cells_Transformed_fibroblasts	0.1083
rs2251396	6	31364706	PSORS1C1	6	31082527	31107869	Adipose_Subcutaneous	1.32882e-09	1.20156e-06	-0.421702	KBM7	NA	TRUE	256837	0.3444	Testis	19.81	Whole_Blood	0
rs2251396	6	31364706	PSORS1C1	6	31082527	31107869	Adipose_Visceral_Omentum	4.03899e-08	2.69295e-05	-0.346716	KBM7	NA	TRUE	256837	0.3242	Testis	19.81	Whole_Blood	0
rs2251396	6	31364706	PSORS1C1	6	31082527	31107869	Adrenal_Gland	4.01178e-07	0.000218548	-0.601624	KBM7	NA	TRUE	256837	0.2982	Testis	19.81	Whole_Blood	0
rs2251396	6	31364706	PSORS1C1	6	31082527	31107869	Artery_Aorta	2.49265e-07	0.000142142	-0.468577	KBM7	NA	TRUE	256837	1.123	Testis	19.81	Whole_Blood	0
rs2251396	6	31364706	PSORS1C1	6	31082527	31107869	Artery_Tibial	2.94082e-06	0.00130061	-0.363071	KBM7	NA	TRUE	256837	0.6428	Testis	19.81	Whole_Blood	0
rs2251396	6	31364706	PSORS1C1	6	31082527	31107869	Breast_Mammary_Tissue	2.34141e-05	0.00795972	-0.303881	KBM7	NA	TRUE	256837	0.5638	Testis	19.81	Whole_Blood	0
rs2251396	6	31364706	PSORS1C1	6	31082527	31107869	Colon_Sigmoid	2.03071e-06	0.000934849	-0.482727	KBM7	NA	TRUE	256837	0.6445	Testis	19.81	Whole_Blood	0
rs2251396	6	31364706	PSORS1C1	6	31082527	31107869	Esophagus_Mucosa	6.25694e-09	5.01624e-06	-0.49962	KBM7	NA	TRUE	256837	0.4121	Testis	19.81	Whole_Blood	0
rs2251396	6	31364706	PSORS1C1	6	31082527	31107869	Esophagus_Muscularis	8.61265e-10	7.9922e-07	-0.445444	KBM7	NA	TRUE	256837	0.479	Testis	19.81	Whole_Blood	0
rs2251396	6	31364706	PSORS1C1	6	31082527	31107869	Heart_Atrial_Appendage	5.49435e-06	0.00222514	-0.386964	KBM7	NA	TRUE	256837	0.4405	Testis	19.81	Whole_Blood	0
rs2251396	6	31364706	PSORS1C1	6	31082527	31107869	Heart_Left_Ventricle	1.20937e-08	9.00164e-06	-0.543206	KBM7	NA	TRUE	256837	0.3633	Testis	19.81	Whole_Blood	0
rs2251396	6	31364706	PSORS1C1	6	31082527	31107869	Lung	2.46085e-07	0.000140783	-0.385691	KBM7	NA	TRUE	256837	0.8275	Testis	19.81	Whole_Blood	0
rs2251396	6	31364706	PSORS1C1	6	31082527	31107869	Nerve_Tibial	8.53892e-09	6.63508e-06	-0.442102	KBM7	NA	TRUE	256837	0.4647	Testis	19.81	Whole_Blood	0
rs2251396	6	31364706	PSORS1C1	6	31082527	31107869	Pancreas	5.67229e-07	0.000297545	-0.476678	KBM7	NA	TRUE	256837	0.09612	Testis	19.81	Whole_Blood	0
rs2251396	6	31364706	PSORS1C1	6	31082527	31107869	Pituitary	1.36637e-05	0.00498024	-0.370158	KBM7	NA	TRUE	256837	0.05425	Testis	19.81	Whole_Blood	0
rs2251396	6	31364706	PSORS1C1	6	31082527	31107869	Prostate	1.31814e-06	0.000630625	-0.543142	KBM7	NA	TRUE	256837	0.5412	Testis	19.81	Whole_Blood	0
rs2251396	6	31364706	PSORS1C1	6	31082527	31107869	Skin_Sun_Exposed_Lower_leg	4.51779e-05	0.0141477	-0.235852	KBM7	NA	TRUE	256837	2.996	Testis	19.81	Whole_Blood	0
rs2251396	6	31364706	PSORS1C1	6	31082527	31107869	Stomach	3.33366e-08	2.25791e-05	-0.440271	KBM7	NA	TRUE	256837	0.616	Testis	19.81	Whole_Blood	0
rs2251396	6	31364706	PSORS1C1	6	31082527	31107869	Thyroid	7.9653e-11	8.5338e-08	-0.516159	KBM7	NA	TRUE	256837	1.026	Testis	19.81	Whole_Blood	0
rs2269241	1	64108770	PGM1	1	64058947	64125916	Testis	1.85019e-05	0.00649592	0.254063	KBM7	NA	TRUE	0	5.69	Muscle_Skeletal	188.6	Testis	5.69
rs2281808	20	1610550	RP11-77C3.3	20	1614154	1629118	Testis	1.53778e-16	3.48518e-13	0.474901	NHEK	NA	TRUE	3604	0.693	Testis	0.693	Adipose_Subcutaneous	0
rs2290400	17	38066239	ERBB2	17	37844167	37886679	Skin_Sun_Exposed_Lower_leg	0.000179489	0.0443767	-0.0682355	NHEK	NA	TRUE	179560	46.55	Skin_Sun_Exposed_Lower_leg	46.55	Whole_Blood	0.6578
rs2290400	17	38066239	GSDMB	17	38060848	38076107	Brain_Caudate_basal_ganglia	0.000154858	0.0394171	-0.224527	KBM7	NA	TRUE	0	6.036	Small_Intestine_Terminal_Ileum	46.19	Muscle_Skeletal	0.9208
rs2290400	17	38066239	GSDMB	17	38060848	38076107	Cells_EBV-transformed_lymphocytes	1.18124e-09	1.08194e-06	-0.482689	KBM7	NA	TRUE	0	10.87	Small_Intestine_Terminal_Ileum	46.19	Muscle_Skeletal	0.9208
rs2290400	17	38066239	GSDMB	17	38060848	38076107	Cells_Transformed_fibroblasts	0.000106977	0.0290715	-0.113838	KBM7	NA	TRUE	0	4.082	Small_Intestine_Terminal_Ileum	46.19	Muscle_Skeletal	0.9208
rs2290400	17	38066239	GSDMB	17	38060848	38076107	Esophagus_Mucosa	3.1136e-06	0.00136241	-0.129022	KBM7	NA	TRUE	0	3.913	Small_Intestine_Terminal_Ileum	46.19	Muscle_Skeletal	0.9208
rs2290400	17	38066239	GSDMB	17	38060848	38076107	Esophagus_Muscularis	0.000189903	0.0464963	-0.105418	KBM7	NA	TRUE	0	4.278	Small_Intestine_Terminal_Ileum	46.19	Muscle_Skeletal	0.9208
rs2290400	17	38066239	GSDMB	17	38060848	38076107	Lung	8.15013e-16	1.695e-12	-0.21585	KBM7	NA	TRUE	0	8.785	Small_Intestine_Terminal_Ileum	46.19	Muscle_Skeletal	0.9208
rs2290400	17	38066239	GSDMB	17	38060848	38076107	Skin_Sun_Exposed_Lower_leg	1.70977e-05	0.00603288	-0.118117	KBM7	NA	TRUE	0	7.526	Small_Intestine_Terminal_Ileum	46.19	Muscle_Skeletal	0.9208
rs2290400	17	38066239	GSDMB	17	38060848	38076107	Small_Intestine_Terminal_Ileum	2.72323e-11	3.1881e-08	-0.320081	KBM7	NA	TRUE	0	46.19	Small_Intestine_Terminal_Ileum	46.19	Muscle_Skeletal	0.9208
rs2290400	17	38066239	GSDMB	17	38060848	38076107	Spleen	6.72391e-25	2.8991e-21	-0.6243	KBM7	NA	TRUE	0	14.88	Small_Intestine_Terminal_Ileum	46.19	Muscle_Skeletal	0.9208
rs2290400	17	38066239	GSDMB	17	38060848	38076107	Stomach	9.19693e-08	5.73279e-05	-0.133084	KBM7	NA	TRUE	0	11.59	Small_Intestine_Terminal_Ileum	46.19	Muscle_Skeletal	0.9208
rs2290400	17	38066239	GSDMB	17	38060848	38076107	Whole_Blood	2.24946e-35	1.89358e-31	-0.322619	KBM7	NA	TRUE	0	6.049	Small_Intestine_Terminal_Ileum	46.19	Muscle_Skeletal	0.9208
rs2290400	17	38066239	MSL1	17	38278551	38293042	Nerve_Tibial	0.000142019	0.0365972	0.180488	IMR90	NA	TRUE	212312	33.37	Cervix_Endocervix	41.78	Heart_Left_Ventricle	9.262
rs2290400	17	38066239	ORMDL3	17	38077294	38083854	Adipose_Subcutaneous	4.49071e-06	0.00187894	0.110875	NHEK	NA	TRUE	11055	27.14	Liver	48.61	Muscle_Skeletal	5.835
rs2290400	17	38066239	ORMDL3	17	38077294	38083854	Artery_Aorta	8.10391e-07	0.000410482	-0.201142	NHEK	NA	TRUE	11055	15.1	Liver	48.61	Muscle_Skeletal	5.835
rs2290400	17	38066239	ORMDL3	17	38077294	38083854	Cells_EBV-transformed_lymphocytes	5.7364e-21	1.91332e-17	-0.766385	NHEK	NA	TRUE	11055	24.78	Liver	48.61	Muscle_Skeletal	5.835
rs2290400	17	38066239	ORMDL3	17	38077294	38083854	Cells_Transformed_fibroblasts	3.35438e-09	2.81682e-06	-0.195328	NHEK	NA	TRUE	11055	10.44	Liver	48.61	Muscle_Skeletal	5.835
rs2290400	17	38066239	ORMDL3	17	38077294	38083854	Esophagus_Mucosa	2.59997e-12	3.48192e-09	-0.202037	NHEK	NA	TRUE	11055	9.43	Liver	48.61	Muscle_Skeletal	5.835
rs2290400	17	38066239	ORMDL3	17	38077294	38083854	Esophagus_Muscularis	2.69127e-07	0.000152485	-0.214501	NHEK	NA	TRUE	11055	12.07	Liver	48.61	Muscle_Skeletal	5.835
rs2290400	17	38066239	ORMDL3	17	38077294	38083854	Lung	7.38796e-15	1.38203e-11	-0.233855	NHEK	NA	TRUE	11055	15.14	Liver	48.61	Muscle_Skeletal	5.835
rs2290400	17	38066239	ORMDL3	17	38077294	38083854	Skin_Sun_Exposed_Lower_leg	5.53325e-07	0.000291116	-0.152358	NHEK	NA	TRUE	11055	16.15	Liver	48.61	Muscle_Skeletal	5.835
rs2290400	17	38066239	ORMDL3	17	38077294	38083854	Spleen	1.25086e-24	5.2029e-21	-0.716725	NHEK	NA	TRUE	11055	17.23	Liver	48.61	Muscle_Skeletal	5.835
rs2290400	17	38066239	ORMDL3	17	38077294	38083854	Whole_Blood	6.8448e-32	4.74509e-28	-0.397216	NHEK	NA	TRUE	11055	8.136	Liver	48.61	Muscle_Skeletal	5.835
rs2290400	17	38066239	PGAP3	17	37827375	37853050	Adipose_Visceral_Omentum	0.000120163	0.0317519	-0.150828	NHEK	NA	TRUE	213189	5.616	Thyroid	25.04	Muscle_Skeletal	2.49
rs2290400	17	38066239	PGAP3	17	37827375	37853050	Heart_Atrial_Appendage	4.62367e-06	0.00192773	-0.208241	NHEK	NA	TRUE	213189	5.41	Thyroid	25.04	Muscle_Skeletal	2.49
rs2290400	17	38066239	PGAP3	17	37827375	37853050	Heart_Left_Ventricle	2.97561e-06	0.0013134	-0.203762	NHEK	NA	TRUE	213189	4.275	Thyroid	25.04	Muscle_Skeletal	2.49
rs2290400	17	38066239	PGAP3	17	37827375	37853050	Lung	2.58476e-06	0.00116118	-0.123522	NHEK	NA	TRUE	213189	9.958	Thyroid	25.04	Muscle_Skeletal	2.49
rs2290400	17	38066239	PGAP3	17	37827375	37853050	Nerve_Tibial	3.67576e-07	0.000201173	-0.159877	NHEK	NA	TRUE	213189	9.82	Thyroid	25.04	Muscle_Skeletal	2.49
rs2290400	17	38066239	PGAP3	17	37827375	37853050	Pancreas	9.36551e-07	0.000467684	-0.212412	NHEK	NA	TRUE	213189	10.26	Thyroid	25.04	Muscle_Skeletal	2.49
rs2290400	17	38066239	PGAP3	17	37827375	37853050	Stomach	3.37535e-07	0.000187048	-0.177866	NHEK	NA	TRUE	213189	9.847	Thyroid	25.04	Muscle_Skeletal	2.49
rs2290400	17	38066239	PGAP3	17	37827375	37853050	Thyroid	1.15895e-12	1.61319e-09	-0.2183	NHEK	NA	TRUE	213189	25.04	Thyroid	25.04	Muscle_Skeletal	2.49
rs2290400	17	38066239	PSMD3	17	38137050	38154213	Cells_Transformed_fibroblasts	4.59435e-07	0.000247237	-0.0812436	NHEK	NA	TRUE	70811	41.58	Muscle_Skeletal	84.17	Whole_Blood	15.33
rs2290400	17	38066239	STARD3	17	37793318	37819737	Cells_Transformed_fibroblasts	9.38287e-05	0.0260592	-0.175986	NHEK	NA	TRUE	246502	11.98	Nerve_Tibial	36.25	Heart_Left_Ventricle	6.106
rs2290400	17	38066239	ZPBP2	17	38024417	38034149	Spleen	0.000113271	0.03027	0.37712	KBM7	NA	TRUE	32090	0.09272	Testis	65.25	Adipose_Subcutaneous	0
rs2290400	17	38066239	ZPBP2	17	38024417	38034149	Testis	1.56528e-13	2.44871e-10	-0.23072	KBM7	NA	TRUE	32090	65.25	Testis	65.25	Adipose_Subcutaneous	0
rs2292239	12	56482179	IKZF4	12	56401443	56432219	Esophagus_Mucosa	0.000147738	0.0378776	-0.209333	HUVEC	NA	TRUE	49960	1.48	Ovary	5.669	Whole_Blood	0.2808
rs2292239	12	56482179	RAB5B	12	56367697	56388490	Muscle_Skeletal	2.57049e-33	1.97566e-29	0.336891	IMR90	NA	TRUE	93689	15.88	Artery_Tibial	28.12	Liver	4.96
rs2292239	12	56482179	SUOX	12	56390964	56400425	Artery_Aorta	1.01838e-08	7.81023e-06	0.248772	IMR90	NA	TRUE	81754	5.949	Liver	15	Whole_Blood	1.77
rs2292239	12	56482179	SUOX	12	56390964	56400425	Artery_Tibial	1.53075e-10	1.57784e-07	0.253056	IMR90	NA	TRUE	81754	5.421	Liver	15	Whole_Blood	1.77
rs2292239	12	56482179	SUOX	12	56390964	56400425	Brain_Amygdala	2.35977e-05	0.00801445	0.445458	IMR90	NA	TRUE	81754	4.282	Liver	15	Whole_Blood	1.77
rs2292239	12	56482179	SUOX	12	56390964	56400425	Brain_Anterior_cingulate_cortex_BA24	0.000123542	0.0324747	0.284831	IMR90	NA	TRUE	81754	5.235	Liver	15	Whole_Blood	1.77
rs2292239	12	56482179	SUOX	12	56390964	56400425	Brain_Caudate_basal_ganglia	4.11743e-05	0.0130325	0.259289	IMR90	NA	TRUE	81754	5.157	Liver	15	Whole_Blood	1.77
rs2292239	12	56482179	SUOX	12	56390964	56400425	Brain_Cerebellar_Hemisphere	5.21976e-06	0.00212611	0.369278	IMR90	NA	TRUE	81754	3.808	Liver	15	Whole_Blood	1.77
rs2292239	12	56482179	SUOX	12	56390964	56400425	Brain_Cerebellum	5.75756e-11	6.32175e-08	0.476816	IMR90	NA	TRUE	81754	4.61	Liver	15	Whole_Blood	1.77
rs2292239	12	56482179	SUOX	12	56390964	56400425	Brain_Cortex	0.000115499	0.0307097	0.294951	IMR90	NA	TRUE	81754	5.717	Liver	15	Whole_Blood	1.77
rs2292239	12	56482179	SUOX	12	56390964	56400425	Brain_Hippocampus	1.36376e-05	0.00497586	0.409967	IMR90	NA	TRUE	81754	4.062	Liver	15	Whole_Blood	1.77
rs2292239	12	56482179	SUOX	12	56390964	56400425	Brain_Hypothalamus	2.51279e-06	0.00113317	0.485072	IMR90	NA	TRUE	81754	4.458	Liver	15	Whole_Blood	1.77
rs2292239	12	56482179	SUOX	12	56390964	56400425	Cells_Transformed_fibroblasts	4.80006e-05	0.0148392	0.152695	IMR90	NA	TRUE	81754	3.019	Liver	15	Whole_Blood	1.77
rs2292239	12	56482179	SUOX	12	56390964	56400425	Colon_Sigmoid	6.5884e-07	0.000342551	0.25707	IMR90	NA	TRUE	81754	7.714	Liver	15	Whole_Blood	1.77
rs2292239	12	56482179	SUOX	12	56390964	56400425	Esophagus_Gastroesophageal_Junction	6.4219e-13	9.26728e-10	0.398496	IMR90	NA	TRUE	81754	6.901	Liver	15	Whole_Blood	1.77
rs2292239	12	56482179	SUOX	12	56390964	56400425	Esophagus_Muscularis	4.6199e-10	4.4265e-07	0.295181	IMR90	NA	TRUE	81754	6.875	Liver	15	Whole_Blood	1.77
rs2292239	12	56482179	SUOX	12	56390964	56400425	Heart_Atrial_Appendage	9.20459e-07	0.00046095	0.148975	IMR90	NA	TRUE	81754	5.514	Liver	15	Whole_Blood	1.77
rs2292239	12	56482179	SUOX	12	56390964	56400425	Heart_Left_Ventricle	3.40418e-05	0.0110621	0.118076	IMR90	NA	TRUE	81754	6.718	Liver	15	Whole_Blood	1.77
rs2292239	12	56482179	SUOX	12	56390964	56400425	Lung	3.19296e-09	2.70807e-06	0.18588	IMR90	NA	TRUE	81754	5.751	Liver	15	Whole_Blood	1.77
rs2292239	12	56482179	SUOX	12	56390964	56400425	Muscle_Skeletal	8.77496e-05	0.0247007	0.0759837	IMR90	NA	TRUE	81754	4.522	Liver	15	Whole_Blood	1.77
rs2292239	12	56482179	SUOX	12	56390964	56400425	Nerve_Tibial	3.31256e-18	8.79686e-15	0.493849	IMR90	NA	TRUE	81754	7.405	Liver	15	Whole_Blood	1.77
rs2292239	12	56482179	SUOX	12	56390964	56400425	Pancreas	3.75008e-07	0.000204923	0.3496	IMR90	NA	TRUE	81754	4.142	Liver	15	Whole_Blood	1.77
rs2292239	12	56482179	SUOX	12	56390964	56400425	Pituitary	5.08403e-09	4.14684e-06	0.459541	IMR90	NA	TRUE	81754	8.247	Liver	15	Whole_Blood	1.77
rs2292239	12	56482179	SUOX	12	56390964	56400425	Skin_Not_Sun_Exposed_Suprapubic	3.61095e-14	6.3201e-11	0.285179	IMR90	NA	TRUE	81754	3.427	Liver	15	Whole_Blood	1.77
rs2292239	12	56482179	SUOX	12	56390964	56400425	Skin_Sun_Exposed_Lower_leg	3.13493e-23	1.20474e-19	0.349792	IMR90	NA	TRUE	81754	3.292	Liver	15	Whole_Blood	1.77
rs2292239	12	56482179	SUOX	12	56390964	56400425	Spleen	6.36372e-05	0.0189387	0.372998	IMR90	NA	TRUE	81754	6.098	Liver	15	Whole_Blood	1.77
rs2292239	12	56482179	SUOX	12	56390964	56400425	Stomach	0.000116986	0.0310283	0.185802	IMR90	NA	TRUE	81754	7.679	Liver	15	Whole_Blood	1.77
rs2292239	12	56482179	SUOX	12	56390964	56400425	Testis	7.9613e-08	5.02632e-05	0.276688	IMR90	NA	TRUE	81754	3.972	Liver	15	Whole_Blood	1.77
rs2292239	12	56482179	SUOX	12	56390964	56400425	Thyroid	5.96393e-17	1.4344e-13	0.403807	IMR90	NA	TRUE	81754	8.985	Liver	15	Whole_Blood	1.77
rs2292239	12	56482179	SUOX	12	56390964	56400425	Whole_Blood	2.52122e-08	1.74439e-05	0.16383	IMR90	NA	TRUE	81754	1.77	Liver	15	Whole_Blood	1.77
rs229541	22	37591317	C1QTNF6	22	37576207	37595425	Esophagus_Muscularis	1.23711e-06	0.00059752	-0.170356	KBM7	NA	TRUE	0	1.015	Cells_Transformed_fibroblasts	4.697	Brain_Cerebellar_Hemisphere	0.2722
rs229541	22	37591317	C1QTNF6	22	37576207	37595425	Muscle_Skeletal	1.77785e-06	0.000828146	0.176373	KBM7	NA	TRUE	0	0.5098	Cells_Transformed_fibroblasts	4.697	Brain_Cerebellar_Hemisphere	0.2722
rs229541	22	37591317	C1QTNF6	22	37576207	37595425	Testis	5.01769e-11	5.54381e-08	-0.445195	KBM7	NA	TRUE	0	4.122	Cells_Transformed_fibroblasts	4.697	Brain_Cerebellar_Hemisphere	0.2722
rs229541	22	37591317	RAC2	22	37621301	37640488	Whole_Blood	3.0623e-06	0.00134162	0.0890998	KBM7	NA	TRUE	29984	327.2	Whole_Blood	327.2	Brain_Cerebellum	0.1504
rs2304256	19	10475651	CDC37	19	10501810	10530797	Heart_Left_Ventricle	0.000106439	0.028975	0.130127	KBM7	NA	TRUE	26159	51.38	Spleen	111.1	Liver	31.99
rs2304256	19	10475651	ICAM5	19	10400657	10407454	Heart_Left_Ventricle	8.09296e-05	0.0232248	-0.255637	KBM7	NA	TRUE	68197	0.08529	Brain_Nucleus_accumbens_basal_ganglia	22.55	Muscle_Skeletal	0.03895
rs2304256	19	10475651	MRPL4	19	10362577	10370721	Breast_Mammary_Tissue	0.000155944	0.0395512	0.110502	KBM7	NA	TRUE	104930	13.38	Cells_EBV-transformed_lymphocytes	31.57	Whole_Blood	4.029
rs2304256	19	10475651	TYK2	19	10461209	10491352	Adipose_Subcutaneous	0.000179729	0.0444052	0.10512	KBM7	NA	TRUE	0	17.24	Spleen	45.05	Testis	6.397
rs2304256	19	10475651	TYK2	19	10461209	10491352	Adrenal_Gland	5.45934e-09	4.41686e-06	0.440643	KBM7	NA	TRUE	0	15.51	Spleen	45.05	Testis	6.397
rs2304256	19	10475651	TYK2	19	10461209	10491352	Artery_Tibial	8.33099e-06	0.00324388	0.107259	KBM7	NA	TRUE	0	9.769	Spleen	45.05	Testis	6.397
rs2304256	19	10475651	TYK2	19	10461209	10491352	Breast_Mammary_Tissue	2.02651e-05	0.00703811	0.175354	KBM7	NA	TRUE	0	18.79	Spleen	45.05	Testis	6.397
rs2304256	19	10475651	TYK2	19	10461209	10491352	Lung	1.87898e-05	0.00657741	0.110886	KBM7	NA	TRUE	0	24.63	Spleen	45.05	Testis	6.397
rs2304256	19	10475651	TYK2	19	10461209	10491352	Nerve_Tibial	8.64029e-08	5.42593e-05	0.132353	KBM7	NA	TRUE	0	22.42	Spleen	45.05	Testis	6.397
rs2304256	19	10475651	TYK2	19	10461209	10491352	Skin_Sun_Exposed_Lower_leg	1.28992e-07	7.82256e-05	0.134651	KBM7	NA	TRUE	0	16.33	Spleen	45.05	Testis	6.397
rs2304256	19	10475651	TYK2	19	10461209	10491352	Whole_Blood	1.43211e-05	0.00516132	0.094457	KBM7	NA	TRUE	0	41.42	Spleen	45.05	Testis	6.397
rs2358994	1	114429460	AP4B1-AS1	1	114399257	114443859	Artery_Aorta	0.000108941	0.0293795	-0.288953	KBM7	NA	TRUE	0	0.5154	Brain_Cerebellum	2.769	Muscle_Skeletal	0.2051
rs2358994	1	114429460	AP4B1-AS1	1	114399257	114443859	Brain_Cerebellum	5.80177e-06	0.00233625	-0.41198	KBM7	NA	TRUE	0	2.769	Brain_Cerebellum	2.769	Muscle_Skeletal	0.2051
rs2358994	1	114429460	AP4B1-AS1	1	114399257	114443859	Cells_Transformed_fibroblasts	8.3739e-11	8.94446e-08	-0.510813	KBM7	NA	TRUE	0	0.5103	Brain_Cerebellum	2.769	Muscle_Skeletal	0.2051
rs2358994	1	114429460	AP4B1-AS1	1	114399257	114443859	Esophagus_Mucosa	7.46095e-05	0.0218003	-0.221773	KBM7	NA	TRUE	0	0.936	Brain_Cerebellum	2.769	Muscle_Skeletal	0.2051
rs2358994	1	114429460	AP4B1-AS1	1	114399257	114443859	Lung	8.76101e-05	0.0247007	-0.192335	KBM7	NA	TRUE	0	1.009	Brain_Cerebellum	2.769	Muscle_Skeletal	0.2051
rs2358994	1	114429460	MAGI3	1	113933371	114228545	Brain_Cerebellar_Hemisphere	0.000178889	0.0442904	-0.267401	IMR90	NA	TRUE	200915	4.17	Thyroid	4.876	Whole_Blood	0.145
rs2410601	8	18922576	PSD3	8	18384811	18942240	Esophagus_Mucosa	5.96556e-08	3.80475e-05	0.170583	KBM7	NA	TRUE	0	2.313	Brain_Cerebellar_Hemisphere	43.7	Whole_Blood	0.03312
rs2410601	8	18922576	PSD3	8	18384811	18942240	Esophagus_Muscularis	6.08317e-05	0.0182265	-0.170678	KBM7	NA	TRUE	0	0.7815	Brain_Cerebellar_Hemisphere	43.7	Whole_Blood	0.03312
rs2410601	8	18922576	PSD3	8	18384811	18942240	Thyroid	2.31373e-07	0.000133229	0.242751	KBM7	NA	TRUE	0	1.392	Brain_Cerebellar_Hemisphere	43.7	Whole_Blood	0.03312
rs2410601	8	18922576	RP11-420B22.1	8	18846789	18858462	Testis	4.91058e-11	5.45959e-08	0.525305	KBM7	NA	TRUE	64114	0.1289	Testis	0.1289	Adipose_Subcutaneous	0
rs2476601	1	114377567	AP4B1-AS1	1	114399257	114443859	Cells_Transformed_fibroblasts	0.000124254	0.0325893	0.465549	KBM7	NA	TRUE	21690	0.5103	Brain_Cerebellum	2.769	Muscle_Skeletal	0.2051
rs2476601	1	114377567	AP4B1-AS1	1	114399257	114443859	Lung	0.000106317	0.028975	0.281348	KBM7	NA	TRUE	21690	1.009	Brain_Cerebellum	2.769	Muscle_Skeletal	0.2051
rs2476601	1	114377567	PHTF1	1	114239453	114302111	Thyroid	0.000164945	0.0414181	0.318411	NHEK	NA	TRUE	75456	1.852	Brain_Cerebellum	13.19	Skin_Not_Sun_Exposed_Suprapubic	0.5632
rs2523989	6	30078274	TRIM26	6	30152232	30181204	Testis	0.000128899	0.0336577	-0.195797	KBM7	NA	TRUE	73958	13.23	Cells_EBV-transformed_lymphocytes	26.53	Muscle_Skeletal	4.824
rs2523989	6	30078274	VARS2	6	30876019	30894236	Brain_Hippocampus	6.33742e-05	0.0188763	-0.511571	KBM7	NA	TRUE	797745	9.358	Brain_Cerebellum	36.73	Whole_Blood	2.722
rs2523989	6	30078274	ZNRD1-AS1	6	29968788	30029417	Artery_Aorta	9.42708e-05	0.0261615	-0.196386	KBM7	NA	TRUE	48857	0.5875	Testis	3.858	Whole_Blood	0.1364
rs2523989	6	30078274	ZNRD1-AS1	6	29968788	30029417	Artery_Tibial	1.19767e-08	8.9522e-06	-0.21203	KBM7	NA	TRUE	48857	0.5906	Testis	3.858	Whole_Blood	0.1364
rs2523989	6	30078274	ZNRD1-AS1	6	29968788	30029417	Breast_Mammary_Tissue	8.84276e-06	0.0034058	-0.166773	KBM7	NA	TRUE	48857	0.7463	Testis	3.858	Whole_Blood	0.1364
rs2523989	6	30078274	ZNRD1-AS1	6	29968788	30029417	Cells_Transformed_fibroblasts	8.93903e-06	0.00342779	-0.233075	KBM7	NA	TRUE	48857	0.5049	Testis	3.858	Whole_Blood	0.1364
rs2523989	6	30078274	ZNRD1-AS1	6	29968788	30029417	Esophagus_Mucosa	3.3106e-06	0.00143792	-0.188941	KBM7	NA	TRUE	48857	0.4508	Testis	3.858	Whole_Blood	0.1364
rs2523989	6	30078274	ZNRD1-AS1	6	29968788	30029417	Esophagus_Muscularis	1.17591e-07	7.20531e-05	-0.256905	KBM7	NA	TRUE	48857	0.5775	Testis	3.858	Whole_Blood	0.1364
rs2523989	6	30078274	ZNRD1-AS1	6	29968788	30029417	Lung	0.000157098	0.0397584	-0.170785	KBM7	NA	TRUE	48857	0.5498	Testis	3.858	Whole_Blood	0.1364
rs2523989	6	30078274	ZNRD1-AS1	6	29968788	30029417	Nerve_Tibial	1.38188e-10	1.43275e-07	-0.297145	KBM7	NA	TRUE	48857	1.103	Testis	3.858	Whole_Blood	0.1364
rs2523989	6	30078274	ZNRD1-AS1	6	29968788	30029417	Pancreas	4.05162e-05	0.0128587	-0.272208	KBM7	NA	TRUE	48857	0.5255	Testis	3.858	Whole_Blood	0.1364
rs2523989	6	30078274	ZNRD1-AS1	6	29968788	30029417	Skin_Sun_Exposed_Lower_leg	1.02396e-06	0.000505621	-0.18106	KBM7	NA	TRUE	48857	0.6844	Testis	3.858	Whole_Blood	0.1364
rs2523989	6	30078274	ZNRD1-AS1	6	29968788	30029417	Spleen	2.06258e-05	0.00712836	-0.372517	KBM7	NA	TRUE	48857	0.7828	Testis	3.858	Whole_Blood	0.1364
rs2523989	6	30078274	ZNRD1-AS1	6	29968788	30029417	Stomach	4.58535e-05	0.0143212	-0.188689	KBM7	NA	TRUE	48857	0.668	Testis	3.858	Whole_Blood	0.1364
rs2523989	6	30078274	ZNRD1-AS1	6	29968788	30029417	Thyroid	6.08098e-11	6.65618e-08	-0.273492	KBM7	NA	TRUE	48857	1.524	Testis	3.858	Whole_Blood	0.1364
rs2664170	X	153945601	BRCC3	X	154299695	154351349	Brain_Caudate_basal_ganglia	0.000155458	0.0395131	0.198259	KBM7	NA	TRUE	354094	3.444	Cells_EBV-transformed_lymphocytes	10.62	Testis	0.7964
rs2664170	X	153945601	BRCC3	X	154299695	154351349	Brain_Cerebellar_Hemisphere	4.14432e-05	0.0131059	0.207109	KBM7	NA	TRUE	354094	7.785	Cells_EBV-transformed_lymphocytes	10.62	Testis	0.7964
rs2664170	X	153945601	BRCC3	X	154299695	154351349	Brain_Cortex	7.98083e-05	0.0230151	0.195084	KBM7	NA	TRUE	354094	4.27	Cells_EBV-transformed_lymphocytes	10.62	Testis	0.7964
rs2664170	X	153945601	BRCC3	X	154299695	154351349	Esophagus_Mucosa	7.87306e-05	0.0227414	0.0891675	KBM7	NA	TRUE	354094	7.553	Cells_EBV-transformed_lymphocytes	10.62	Testis	0.7964
rs2664170	X	153945601	BRCC3	X	154299695	154351349	Nerve_Tibial	0.000122041	0.0321759	0.157165	KBM7	NA	TRUE	354094	4.608	Cells_EBV-transformed_lymphocytes	10.62	Testis	0.7964
rs2664170	X	153945601	BRCC3	X	154299695	154351349	Thyroid	9.7358e-05	0.0268496	0.10659	KBM7	NA	TRUE	354094	4.867	Cells_EBV-transformed_lymphocytes	10.62	Testis	0.7964
rs2664170	X	153945601	F8	X	154064063	154255215	Adipose_Subcutaneous	1.04077e-05	0.00392709	0.167744	KBM7	NA	TRUE	118462	6.231	Adipose_Visceral_Omentum	8.04	Whole_Blood	0.3938
rs2664170	X	153945601	F8	X	154064063	154255215	Adipose_Visceral_Omentum	6.40155e-05	0.0190192	0.163581	KBM7	NA	TRUE	118462	8.04	Adipose_Visceral_Omentum	8.04	Whole_Blood	0.3938
rs2664170	X	153945601	F8	X	154064063	154255215	Brain_Cortex	6.91743e-06	0.00274487	0.230749	KBM7	NA	TRUE	118462	2.047	Adipose_Visceral_Omentum	8.04	Whole_Blood	0.3938
rs2664170	X	153945601	F8	X	154064063	154255215	Brain_Nucleus_accumbens_basal_ganglia	3.15216e-05	0.0103767	0.24097	KBM7	NA	TRUE	118462	1.941	Adipose_Visceral_Omentum	8.04	Whole_Blood	0.3938
rs2664170	X	153945601	F8	X	154064063	154255215	Breast_Mammary_Tissue	8.28159e-06	0.00323177	0.167622	KBM7	NA	TRUE	118462	5.32	Adipose_Visceral_Omentum	8.04	Whole_Blood	0.3938
rs2664170	X	153945601	F8	X	154064063	154255215	Nerve_Tibial	2.12162e-09	1.85211e-06	0.23971	KBM7	NA	TRUE	118462	2.998	Adipose_Visceral_Omentum	8.04	Whole_Blood	0.3938
rs2664170	X	153945601	FUNDC2	X	154254255	154288578	Adrenal_Gland	0.000168368	0.0421282	0.166651	IMR90	NA	TRUE	308654	10.88	Heart_Left_Ventricle	20.2	Whole_Blood	3.469
rs2664170	X	153945601	FUNDC2	X	154254255	154288578	Nerve_Tibial	0.000163409	0.0411201	0.0932373	IMR90	NA	TRUE	308654	11.24	Heart_Left_Ventricle	20.2	Whole_Blood	3.469
rs2664170	X	153945601	PLXNA3	X	153686621	153701989	Brain_Cerebellum	3.20582e-06	0.00139585	0.265944	IMR90	NA	TRUE	243612	32.39	Pituitary	39.77	Muscle_Skeletal	1.056
rs2664170	X	153945601	PLXNA3	X	153686621	153701989	Breast_Mammary_Tissue	0.00019646	0.0479358	0.156597	IMR90	NA	TRUE	243612	8.445	Pituitary	39.77	Muscle_Skeletal	1.056
rs2664170	X	153945601	PLXNA3	X	153686621	153701989	Esophagus_Mucosa	1.02259e-05	0.0038626	0.171608	IMR90	NA	TRUE	243612	5.505	Pituitary	39.77	Muscle_Skeletal	1.056
rs2664170	X	153945601	PLXNA3	X	153686621	153701989	Lung	2.26685e-07	0.000131167	0.140447	IMR90	NA	TRUE	243612	10.59	Pituitary	39.77	Muscle_Skeletal	1.056
rs2664170	X	153945601	PLXNA3	X	153686621	153701989	Muscle_Skeletal	4.86028e-06	0.00200979	0.150083	IMR90	NA	TRUE	243612	1.056	Pituitary	39.77	Muscle_Skeletal	1.056
rs2664170	X	153945601	PLXNA3	X	153686621	153701989	Testis	6.06284e-05	0.018181	0.15516	IMR90	NA	TRUE	243612	6.384	Pituitary	39.77	Muscle_Skeletal	1.056
rs2664170	X	153945601	PLXNA3	X	153686621	153701989	Whole_Blood	0.000129531	0.0337231	0.0942575	IMR90	NA	TRUE	243612	1.41	Pituitary	39.77	Muscle_Skeletal	1.056
rs2664170	X	153945601	RAB39B	X	154487526	154493874	Brain_Putamen_basal_ganglia	6.69084e-05	0.0197625	0.142439	K562	NA	TRUE	541925	3.521	Brain_Cerebellar_Hemisphere	8.486	Muscle_Skeletal	0.01467
rs2664170	X	153945601	RAB39B	X	154487526	154493874	Heart_Atrial_Appendage	2.51606e-05	0.00849629	-0.219996	K562	NA	TRUE	541925	0.1837	Brain_Cerebellar_Hemisphere	8.486	Muscle_Skeletal	0.01467
rs2664170	X	153945601	TMLHE	X	154719776	154899605	Adipose_Subcutaneous	3.21351e-06	0.00139747	-0.196085	NHEK	NA	TRUE	774175	2.189	Cells_EBV-transformed_lymphocytes	3.22	Testis	0.6683
rs2664170	X	153945601	TMLHE	X	154719776	154899605	Adrenal_Gland	1.32487e-05	0.00486914	-0.205193	NHEK	NA	TRUE	774175	2.796	Cells_EBV-transformed_lymphocytes	3.22	Testis	0.6683
rs2664170	X	153945601	TMLHE	X	154719776	154899605	Artery_Tibial	1.63109e-06	0.000765841	-0.207074	NHEK	NA	TRUE	774175	2.293	Cells_EBV-transformed_lymphocytes	3.22	Testis	0.6683
rs2664170	X	153945601	TMLHE	X	154719776	154899605	Brain_Amygdala	2.3214e-05	0.00789931	-0.356044	NHEK	NA	TRUE	774175	1.142	Cells_EBV-transformed_lymphocytes	3.22	Testis	0.6683
rs2664170	X	153945601	TMLHE	X	154719776	154899605	Brain_Anterior_cingulate_cortex_BA24	9.65686e-06	0.00366332	-0.390454	NHEK	NA	TRUE	774175	1.172	Cells_EBV-transformed_lymphocytes	3.22	Testis	0.6683
rs2664170	X	153945601	TMLHE	X	154719776	154899605	Brain_Caudate_basal_ganglia	3.77185e-06	0.00161446	-0.325046	NHEK	NA	TRUE	774175	1.284	Cells_EBV-transformed_lymphocytes	3.22	Testis	0.6683
rs2664170	X	153945601	TMLHE	X	154719776	154899605	Brain_Nucleus_accumbens_basal_ganglia	3.27937e-05	0.0107355	-0.264703	NHEK	NA	TRUE	774175	1.242	Cells_EBV-transformed_lymphocytes	3.22	Testis	0.6683
rs2664170	X	153945601	TMLHE	X	154719776	154899605	Cells_Transformed_fibroblasts	1.43692e-06	0.000683752	-0.200539	NHEK	NA	TRUE	774175	1.883	Cells_EBV-transformed_lymphocytes	3.22	Testis	0.6683
rs2664170	X	153945601	TMLHE	X	154719776	154899605	Esophagus_Gastroesophageal_Junction	1.14094e-05	0.00427767	-0.196409	NHEK	NA	TRUE	774175	1.99	Cells_EBV-transformed_lymphocytes	3.22	Testis	0.6683
rs2664170	X	153945601	TMLHE	X	154719776	154899605	Esophagus_Mucosa	1.23703e-08	9.18811e-06	-0.213731	NHEK	NA	TRUE	774175	1.689	Cells_EBV-transformed_lymphocytes	3.22	Testis	0.6683
rs2664170	X	153945601	TMLHE	X	154719776	154899605	Esophagus_Muscularis	1.66002e-06	0.000777357	-0.177212	NHEK	NA	TRUE	774175	2.095	Cells_EBV-transformed_lymphocytes	3.22	Testis	0.6683
rs2664170	X	153945601	TMLHE	X	154719776	154899605	Heart_Left_Ventricle	7.33052e-05	0.0214725	-0.106563	NHEK	NA	TRUE	774175	2.742	Cells_EBV-transformed_lymphocytes	3.22	Testis	0.6683
rs2664170	X	153945601	TMLHE	X	154719776	154899605	Lung	1.38284e-06	0.000659794	-0.174982	NHEK	NA	TRUE	774175	1.605	Cells_EBV-transformed_lymphocytes	3.22	Testis	0.6683
rs2664170	X	153945601	TMLHE	X	154719776	154899605	Muscle_Skeletal	1.91319e-12	2.62175e-09	-0.194643	NHEK	NA	TRUE	774175	3.013	Cells_EBV-transformed_lymphocytes	3.22	Testis	0.6683
rs2664170	X	153945601	TMLHE	X	154719776	154899605	Nerve_Tibial	1.70591e-05	0.00602526	-0.173272	NHEK	NA	TRUE	774175	1.958	Cells_EBV-transformed_lymphocytes	3.22	Testis	0.6683
rs2664170	X	153945601	TMLHE	X	154719776	154899605	Skin_Not_Sun_Exposed_Suprapubic	5.45044e-05	0.0166122	-0.14829	NHEK	NA	TRUE	774175	1.57	Cells_EBV-transformed_lymphocytes	3.22	Testis	0.6683
rs2664170	X	153945601	TMLHE	X	154719776	154899605	Skin_Sun_Exposed_Lower_leg	8.08747e-07	0.000410236	-0.20491	NHEK	NA	TRUE	774175	1.573	Cells_EBV-transformed_lymphocytes	3.22	Testis	0.6683
rs2664170	X	153945601	TMLHE	X	154719776	154899605	Small_Intestine_Terminal_Ileum	3.56537e-05	0.0115022	-0.343558	NHEK	NA	TRUE	774175	1.814	Cells_EBV-transformed_lymphocytes	3.22	Testis	0.6683
rs2664170	X	153945601	TMLHE	X	154719776	154899605	Stomach	5.62823e-08	3.62455e-05	-0.288693	NHEK	NA	TRUE	774175	1.734	Cells_EBV-transformed_lymphocytes	3.22	Testis	0.6683
rs2664170	X	153945601	TMLHE	X	154719776	154899605	Thyroid	2.99135e-06	0.00131581	-0.17402	NHEK	NA	TRUE	774175	2.118	Cells_EBV-transformed_lymphocytes	3.22	Testis	0.6683
rs2836882	21	40466569	AF064858.8	21	40360633	40378079	Whole_Blood	9.29003e-12	1.15246e-08	-0.258231	KBM7	NA	TRUE	88490	0.467	Spleen	4.13	Cells_EBV-transformed_lymphocytes	0
rs2836882	21	40466569	ETS2	21	40177231	40196879	Spleen	2.01296e-05	0.00700253	-0.278228	IMR90	NA	TRUE	269690	107.3	Skin_Not_Sun_Exposed_Suprapubic	111.5	Cells_EBV-transformed_lymphocytes	2.027
rs2836882	21	40466569	ETS2	21	40177231	40196879	Whole_Blood	2.26384e-08	1.57867e-05	-0.15268	IMR90	NA	TRUE	269690	24.45	Skin_Not_Sun_Exposed_Suprapubic	111.5	Cells_EBV-transformed_lymphocytes	2.027
rs2857595	6	31568468	MICB	6	31462658	31478901	Brain_Cerebellar_Hemisphere	3.32783e-06	0.00144364	0.814918	IMR90	NA	TRUE	89567	1.602	Cells_EBV-transformed_lymphocytes	12.96	Muscle_Skeletal	0.182
rs2857595	6	31568468	MICB	6	31462658	31478901	Brain_Cerebellum	1.85524e-07	0.000109686	0.807933	IMR90	NA	TRUE	89567	1.739	Cells_EBV-transformed_lymphocytes	12.96	Muscle_Skeletal	0.182
rs2857595	6	31568468	MICB	6	31462658	31478901	Esophagus_Mucosa	5.05797e-05	0.0155907	0.290506	IMR90	NA	TRUE	89567	0.7851	Cells_EBV-transformed_lymphocytes	12.96	Muscle_Skeletal	0.182
rs2857595	6	31568468	MSH5	6	31707725	31732622	Artery_Aorta	3.38048e-06	0.00145988	-0.225764	NHEK	NA	TRUE	139257	1.002	Testis	14.61	Muscle_Skeletal	0.3934
rs2857595	6	31568468	MSH5	6	31707725	31732622	Esophagus_Mucosa	7.89626e-06	0.0030985	-0.155036	NHEK	NA	TRUE	139257	2.772	Testis	14.61	Muscle_Skeletal	0.3934
rs2857595	6	31568468	MSH5	6	31707725	31732622	Skin_Not_Sun_Exposed_Suprapubic	0.000121195	0.0320007	-0.148519	NHEK	NA	TRUE	139257	3.608	Testis	14.61	Muscle_Skeletal	0.3934
rs2872507	17	38040762	ERBB2	17	37844167	37886679	Heart_Atrial_Appendage	9.67384e-06	0.00366582	-0.151022	HUVEC	NA	TRUE	154083	20.17	Skin_Sun_Exposed_Lower_leg	46.55	Whole_Blood	0.6578
rs2872507	17	38040762	GSDMA	17	38119226	38134019	Adipose_Subcutaneous	7.86537e-12	9.93152e-09	0.441229	IMR90	NA	TRUE	78464	0.3203	Skin_Sun_Exposed_Lower_leg	34.64	Brain_Cerebellar_Hemisphere	0
rs2872507	17	38040762	GSDMA	17	38119226	38134019	Adipose_Visceral_Omentum	3.21425e-12	4.22456e-09	0.429931	IMR90	NA	TRUE	78464	0.3219	Skin_Sun_Exposed_Lower_leg	34.64	Brain_Cerebellar_Hemisphere	0
rs2872507	17	38040762	GSDMA	17	38119226	38134019	Adrenal_Gland	6.79612e-06	0.0027028	0.421248	IMR90	NA	TRUE	78464	0.2021	Skin_Sun_Exposed_Lower_leg	34.64	Brain_Cerebellar_Hemisphere	0
rs2872507	17	38040762	GSDMA	17	38119226	38134019	Artery_Aorta	8.21577e-09	6.39804e-06	0.39633	IMR90	NA	TRUE	78464	0.1106	Skin_Sun_Exposed_Lower_leg	34.64	Brain_Cerebellar_Hemisphere	0
rs2872507	17	38040762	GSDMA	17	38119226	38134019	Artery_Coronary	2.10876e-05	0.00726666	0.461705	IMR90	NA	TRUE	78464	0.1103	Skin_Sun_Exposed_Lower_leg	34.64	Brain_Cerebellar_Hemisphere	0
rs2872507	17	38040762	GSDMA	17	38119226	38134019	Artery_Tibial	4.39576e-11	4.90263e-08	0.393109	IMR90	NA	TRUE	78464	0.04089	Skin_Sun_Exposed_Lower_leg	34.64	Brain_Cerebellar_Hemisphere	0
rs2872507	17	38040762	GSDMA	17	38119226	38134019	Breast_Mammary_Tissue	2.42294e-06	0.00109966	0.385812	IMR90	NA	TRUE	78464	0.1423	Skin_Sun_Exposed_Lower_leg	34.64	Brain_Cerebellar_Hemisphere	0
rs2872507	17	38040762	GSDMA	17	38119226	38134019	Colon_Sigmoid	1.58056e-08	1.13349e-05	0.464198	IMR90	NA	TRUE	78464	0.06304	Skin_Sun_Exposed_Lower_leg	34.64	Brain_Cerebellar_Hemisphere	0
rs2872507	17	38040762	GSDMA	17	38119226	38134019	Esophagus_Gastroesophageal_Junction	0.000197173	0.0480434	0.329254	IMR90	NA	TRUE	78464	0.08469	Skin_Sun_Exposed_Lower_leg	34.64	Brain_Cerebellar_Hemisphere	0
rs2872507	17	38040762	GSDMA	17	38119226	38134019	Esophagus_Muscularis	2.80014e-11	3.26355e-08	0.422389	IMR90	NA	TRUE	78464	0.1006	Skin_Sun_Exposed_Lower_leg	34.64	Brain_Cerebellar_Hemisphere	0
rs2872507	17	38040762	GSDMA	17	38119226	38134019	Heart_Left_Ventricle	4.01395e-05	0.0127648	0.340532	IMR90	NA	TRUE	78464	0.0298	Skin_Sun_Exposed_Lower_leg	34.64	Brain_Cerebellar_Hemisphere	0
rs2872507	17	38040762	GSDMA	17	38119226	38134019	Lung	2.30084e-09	1.9938e-06	0.360496	IMR90	NA	TRUE	78464	0.1669	Skin_Sun_Exposed_Lower_leg	34.64	Brain_Cerebellar_Hemisphere	0
rs2872507	17	38040762	GSDMA	17	38119226	38134019	Muscle_Skeletal	3.85694e-09	3.20102e-06	0.342836	IMR90	NA	TRUE	78464	0.01869	Skin_Sun_Exposed_Lower_leg	34.64	Brain_Cerebellar_Hemisphere	0
rs2872507	17	38040762	GSDMA	17	38119226	38134019	Nerve_Tibial	4.1798e-09	3.44471e-06	0.380807	IMR90	NA	TRUE	78464	0.09061	Skin_Sun_Exposed_Lower_leg	34.64	Brain_Cerebellar_Hemisphere	0
rs2872507	17	38040762	GSDMA	17	38119226	38134019	Pancreas	1.22216e-05	0.00453886	0.309115	IMR90	NA	TRUE	78464	0.0206	Skin_Sun_Exposed_Lower_leg	34.64	Brain_Cerebellar_Hemisphere	0
rs2872507	17	38040762	GSDMA	17	38119226	38134019	Thyroid	1.73607e-10	1.77397e-07	0.3649	IMR90	NA	TRUE	78464	0.05418	Skin_Sun_Exposed_Lower_leg	34.64	Brain_Cerebellar_Hemisphere	0
rs2872507	17	38040762	GSDMB	17	38060848	38076107	Cells_EBV-transformed_lymphocytes	7.5011e-08	4.75275e-05	-0.424081	KBM7	NA	TRUE	20086	10.87	Small_Intestine_Terminal_Ileum	46.19	Muscle_Skeletal	0.9208
rs2872507	17	38040762	GSDMB	17	38060848	38076107	Lung	4.65422e-10	4.44733e-07	-0.167938	KBM7	NA	TRUE	20086	8.785	Small_Intestine_Terminal_Ileum	46.19	Muscle_Skeletal	0.9208
rs2872507	17	38040762	GSDMB	17	38060848	38076107	Small_Intestine_Terminal_Ileum	5.04706e-08	3.28998e-05	-0.26638	KBM7	NA	TRUE	20086	46.19	Small_Intestine_Terminal_Ileum	46.19	Muscle_Skeletal	0.9208
rs2872507	17	38040762	GSDMB	17	38060848	38076107	Spleen	8.22291e-14	1.3522e-10	-0.473346	KBM7	NA	TRUE	20086	14.88	Small_Intestine_Terminal_Ileum	46.19	Muscle_Skeletal	0.9208
rs2872507	17	38040762	GSDMB	17	38060848	38076107	Stomach	1.27854e-08	9.45671e-06	-0.139297	KBM7	NA	TRUE	20086	11.59	Small_Intestine_Terminal_Ileum	46.19	Muscle_Skeletal	0.9208
rs2872507	17	38040762	GSDMB	17	38060848	38076107	Whole_Blood	3.64623e-28	2.07925e-24	-0.287219	KBM7	NA	TRUE	20086	6.049	Small_Intestine_Terminal_Ileum	46.19	Muscle_Skeletal	0.9208
rs2872507	17	38040762	MED24	17	38175350	38217468	Artery_Tibial	7.38805e-06	0.002912	0.200078	KBM7	NA	TRUE	134588	10.51	Brain_Cerebellum	26.47	Whole_Blood	3.82
rs2872507	17	38040762	MED24	17	38175350	38217468	Muscle_Skeletal	0.000130348	0.0338861	-0.118356	KBM7	NA	TRUE	134588	18.5	Brain_Cerebellum	26.47	Whole_Blood	3.82
rs2872507	17	38040762	ORMDL3	17	38077294	38083854	Adipose_Subcutaneous	5.76687e-08	3.69365e-05	0.128833	NHEK	NA	TRUE	36532	27.14	Liver	48.61	Muscle_Skeletal	5.835
rs2872507	17	38040762	ORMDL3	17	38077294	38083854	Cells_EBV-transformed_lymphocytes	5.01389e-18	1.30344e-14	-0.708588	NHEK	NA	TRUE	36532	24.78	Liver	48.61	Muscle_Skeletal	5.835
rs2872507	17	38040762	ORMDL3	17	38077294	38083854	Esophagus_Mucosa	3.39641e-06	0.0014644	-0.135076	NHEK	NA	TRUE	36532	9.43	Liver	48.61	Muscle_Skeletal	5.835
rs2872507	17	38040762	ORMDL3	17	38077294	38083854	Lung	2.82328e-10	2.79602e-07	-0.189938	NHEK	NA	TRUE	36532	15.14	Liver	48.61	Muscle_Skeletal	5.835
rs2872507	17	38040762	ORMDL3	17	38077294	38083854	Skin_Sun_Exposed_Lower_leg	0.000138079	0.0356854	-0.115088	NHEK	NA	TRUE	36532	16.15	Liver	48.61	Muscle_Skeletal	5.835
rs2872507	17	38040762	ORMDL3	17	38077294	38083854	Spleen	1.01147e-18	2.8158e-15	-0.619328	NHEK	NA	TRUE	36532	17.23	Liver	48.61	Muscle_Skeletal	5.835
rs2872507	17	38040762	ORMDL3	17	38077294	38083854	Whole_Blood	3.11479e-28	1.83541e-24	-0.369347	NHEK	NA	TRUE	36532	8.136	Liver	48.61	Muscle_Skeletal	5.835
rs2872507	17	38040762	PSMD3	17	38137050	38154213	Cells_Transformed_fibroblasts	1.4487e-07	8.71076e-05	-0.0844583	NHEK	NA	TRUE	96288	41.58	Muscle_Skeletal	84.17	Whole_Blood	15.33
rs2872507	17	38040762	RP11-94L15.2	17	37913974	37920089	Cells_EBV-transformed_lymphocytes	6.40098e-06	0.00255139	0.313128	HUVEC	NA	TRUE	120673	28.54	Cells_EBV-transformed_lymphocytes	28.54	Cells_Transformed_fibroblasts	0
rs2872507	17	38040762	ZPBP2	17	38024417	38034149	Spleen	2.75897e-05	0.00922839	0.389204	K562	NA	TRUE	6613	0.09272	Testis	65.25	Adipose_Subcutaneous	0
rs2872507	17	38040762	ZPBP2	17	38024417	38034149	Testis	3.66122e-15	7.15158e-12	-0.245579	K562	NA	TRUE	6613	65.25	Testis	65.25	Adipose_Subcutaneous	0
rs2903692	16	11238782	RMI2	16	11343476	11445619	Thyroid	2.2747e-06	0.00103771	0.269327	KBM7	NA	TRUE	104694	0.3957	Cells_EBV-transformed_lymphocytes	11.46	Brain_Cerebellar_Hemisphere	0.06741
rs2990510	1	197020657	F13B	1	197008321	197036397	Testis	3.52334e-05	0.0114037	0.38373	KBM7	NA	TRUE	0	0.3021	Liver	16.76	Adipose_Subcutaneous	0
rs3087243	2	204738918	CTLA4	2	204732509	204738683	Lung	3.65877e-05	0.0117522	0.191382	KBM7	NA	TRUE	235	1.537	Spleen	2.653	Cells_Transformed_fibroblasts	0.01225
rs3087243	2	204738918	CTLA4	2	204732509	204738683	Testis	7.69291e-12	9.74858e-09	0.429586	KBM7	NA	TRUE	235	1.021	Spleen	2.653	Cells_Transformed_fibroblasts	0.01225
rs317865	4	16156665	TAPT1-AS1	4	16228286	16321763	Skin_Sun_Exposed_Lower_leg	0.000127722	0.0333752	-0.143441	KBM7	NA	TRUE	71621	0.8334	Pituitary	2.97	Muscle_Skeletal	0.1292
rs317865	4	16156665	ZEB2P1	4	16362309	16398946	Brain_Nucleus_accumbens_basal_ganglia	2.94754e-05	0.00976675	0.754764	HUVEC	NA	TRUE	205644	0.06284	Pituitary	0.1246	Adipose_Subcutaneous	0
rs36001488	2	234185266	ATG16L1	2	234118697	234204320	Adipose_Subcutaneous	4.97851e-07	0.000265887	-0.22898	KBM7	NA	TRUE	0	7.771	Brain_Cerebellar_Hemisphere	20.48	Brain_Amygdala	3.727
rs36001488	2	234185266	ATG16L1	2	234118697	234204320	Brain_Cerebellum	0.00017264	0.0430448	-0.234517	KBM7	NA	TRUE	0	20.37	Brain_Cerebellar_Hemisphere	20.48	Brain_Amygdala	3.727
rs36001488	2	234185266	ATG16L1	2	234118697	234204320	Cells_Transformed_fibroblasts	2.81211e-06	0.0012459	0.130595	KBM7	NA	TRUE	0	6.867	Brain_Cerebellar_Hemisphere	20.48	Brain_Amygdala	3.727
rs36001488	2	234185266	ATG16L1	2	234118697	234204320	Esophagus_Mucosa	9.78077e-19	2.76642e-15	0.451047	KBM7	NA	TRUE	0	7.761	Brain_Cerebellar_Hemisphere	20.48	Brain_Amygdala	3.727
rs36001488	2	234185266	ATG16L1	2	234118697	234204320	Pituitary	2.18447e-07	0.000126611	-0.351636	KBM7	NA	TRUE	0	6.59	Brain_Cerebellar_Hemisphere	20.48	Brain_Amygdala	3.727
rs36001488	2	234185266	ATG16L1	2	234118697	234204320	Skin_Not_Sun_Exposed_Suprapubic	4.98002e-24	1.97832e-20	0.458849	KBM7	NA	TRUE	0	11.95	Brain_Cerebellar_Hemisphere	20.48	Brain_Amygdala	3.727
rs36001488	2	234185266	ATG16L1	2	234118697	234204320	Skin_Sun_Exposed_Lower_leg	1.95766e-25	8.87357e-22	0.349593	KBM7	NA	TRUE	0	13.05	Brain_Cerebellar_Hemisphere	20.48	Brain_Amygdala	3.727
rs36001488	2	234185266	ATG16L1	2	234118697	234204320	Stomach	1.58175e-07	9.46247e-05	0.299597	KBM7	NA	TRUE	0	8.811	Brain_Cerebellar_Hemisphere	20.48	Brain_Amygdala	3.727
rs36001488	2	234185266	ATG16L1	2	234118697	234204320	Testis	1.68206e-22	6.13091e-19	0.290033	KBM7	NA	TRUE	0	13.49	Brain_Cerebellar_Hemisphere	20.48	Brain_Amygdala	3.727
rs36001488	2	234185266	ATG16L1	2	234118697	234204320	Thyroid	4.57357e-08	3.03377e-05	0.168034	KBM7	NA	TRUE	0	13.07	Brain_Cerebellar_Hemisphere	20.48	Brain_Amygdala	3.727
rs36001488	2	234185266	USP40	2	234384166	234475428	Cells_Transformed_fibroblasts	0.000116609	0.0309749	0.122901	KBM7	NA	TRUE	198900	7.142	Thyroid	12.3	Whole_Blood	0.6404
rs3741208	11	2169773	IGF2-AS	11	2161731	2169894	Liver	4.09905e-05	0.012986	0.389057	KBM7	NA	TRUE	0	0.5799	Nerve_Tibial	0.8458	Cells_EBV-transformed_lymphocytes	0
rs3761980	6	35993905	MAPK14	6	35995488	36079013	Brain_Amygdala	0.000149437	0.0382024	-0.592837	NHEK	NA	TRUE	1583	3.538	Whole_Blood	38.27	Brain_Substantia_nigra	3.284
rs3761980	6	35993905	MAPK14	6	35995488	36079013	Testis	5.71775e-05	0.0172928	0.169391	NHEK	NA	TRUE	1583	5.618	Whole_Blood	38.27	Brain_Substantia_nigra	3.284
rs3761980	6	35993905	RP1-179N16.6	6	36114475	36164982	Muscle_Skeletal	0.000204433	0.0494039	-0.204807	IMR90	NA	TRUE	120570	0.9348	Testis	8.75	Whole_Blood	0.1484
rs3761980	6	35993905	SRPK1	6	35800743	35889119	Testis	7.51923e-05	0.0218796	0.131038	KBM7	NA	TRUE	104786	22.47	Whole_Blood	24.98	Brain_Amygdala	2.438
rs3764021	12	9833627	CLEC2B	12	10005583	10022735	Muscle_Skeletal	0.000108437	0.0292883	-0.11932	HUVEC	NA	TRUE	171956	3.998	Spleen	21.33	Brain_Cerebellar_Hemisphere	0.6708
rs3764021	12	9833627	CLECL1	12	9868456	9885895	Adipose_Subcutaneous	6.23245e-19	1.80615e-15	-0.535896	KBM7	NA	TRUE	34829	0.1472	Cells_EBV-transformed_lymphocytes	21.94	Cells_Transformed_fibroblasts	0
rs3764021	12	9833627	CLECL1	12	9868456	9885895	Adipose_Visceral_Omentum	6.43531e-15	1.22324e-11	-0.498074	KBM7	NA	TRUE	34829	0.1776	Cells_EBV-transformed_lymphocytes	21.94	Cells_Transformed_fibroblasts	0
rs3764021	12	9833627	CLECL1	12	9868456	9885895	Adrenal_Gland	3.12831e-10	3.06377e-07	-0.554263	KBM7	NA	TRUE	34829	0.1486	Cells_EBV-transformed_lymphocytes	21.94	Cells_Transformed_fibroblasts	0
rs3764021	12	9833627	CLECL1	12	9868456	9885895	Artery_Aorta	2.14875e-13	3.28873e-10	-0.515286	KBM7	NA	TRUE	34829	0.08542	Cells_EBV-transformed_lymphocytes	21.94	Cells_Transformed_fibroblasts	0
rs3764021	12	9833627	CLECL1	12	9868456	9885895	Artery_Coronary	5.09359e-06	0.00208191	-0.402677	KBM7	NA	TRUE	34829	0.1315	Cells_EBV-transformed_lymphocytes	21.94	Cells_Transformed_fibroblasts	0
rs3764021	12	9833627	CLECL1	12	9868456	9885895	Artery_Tibial	3.29e-11	3.80127e-08	-0.406392	KBM7	NA	TRUE	34829	0.0384	Cells_EBV-transformed_lymphocytes	21.94	Cells_Transformed_fibroblasts	0
rs3764021	12	9833627	CLECL1	12	9868456	9885895	Brain_Caudate_basal_ganglia	1.92337e-08	1.35731e-05	-0.579149	KBM7	NA	TRUE	34829	0.06398	Cells_EBV-transformed_lymphocytes	21.94	Cells_Transformed_fibroblasts	0
rs3764021	12	9833627	CLECL1	12	9868456	9885895	Brain_Hippocampus	2.63896e-06	0.00118403	-0.521445	KBM7	NA	TRUE	34829	0.06435	Cells_EBV-transformed_lymphocytes	21.94	Cells_Transformed_fibroblasts	0
rs3764021	12	9833627	CLECL1	12	9868456	9885895	Brain_Hypothalamus	1.10127e-07	6.80695e-05	-0.587545	KBM7	NA	TRUE	34829	0.06208	Cells_EBV-transformed_lymphocytes	21.94	Cells_Transformed_fibroblasts	0
rs3764021	12	9833627	CLECL1	12	9868456	9885895	Brain_Spinal_cord_cervical_c-1	2.21585e-08	1.55133e-05	-0.832455	KBM7	NA	TRUE	34829	0.2088	Cells_EBV-transformed_lymphocytes	21.94	Cells_Transformed_fibroblasts	0
rs3764021	12	9833627	CLECL1	12	9868456	9885895	Brain_Substantia_nigra	6.21462e-05	0.0185842	-0.586296	KBM7	NA	TRUE	34829	0.1205	Cells_EBV-transformed_lymphocytes	21.94	Cells_Transformed_fibroblasts	0
rs3764021	12	9833627	CLECL1	12	9868456	9885895	Colon_Sigmoid	5.65345e-08	3.63417e-05	-0.47094	KBM7	NA	TRUE	34829	0.05984	Cells_EBV-transformed_lymphocytes	21.94	Cells_Transformed_fibroblasts	0
rs3764021	12	9833627	CLECL1	12	9868456	9885895	Esophagus_Gastroesophageal_Junction	3.39529e-07	0.000187858	-0.480202	KBM7	NA	TRUE	34829	0.05247	Cells_EBV-transformed_lymphocytes	21.94	Cells_Transformed_fibroblasts	0
rs3764021	12	9833627	CLECL1	12	9868456	9885895	Esophagus_Mucosa	2.10346e-05	0.00725547	-0.223663	KBM7	NA	TRUE	34829	0.1023	Cells_EBV-transformed_lymphocytes	21.94	Cells_Transformed_fibroblasts	0
rs3764021	12	9833627	CLECL1	12	9868456	9885895	Esophagus_Muscularis	5.48975e-11	6.04647e-08	-0.474928	KBM7	NA	TRUE	34829	0.06023	Cells_EBV-transformed_lymphocytes	21.94	Cells_Transformed_fibroblasts	0
rs3764021	12	9833627	CLECL1	12	9868456	9885895	Heart_Atrial_Appendage	7.31366e-08	4.65066e-05	-0.403277	KBM7	NA	TRUE	34829	0.0459	Cells_EBV-transformed_lymphocytes	21.94	Cells_Transformed_fibroblasts	0
rs3764021	12	9833627	CLECL1	12	9868456	9885895	Liver	4.78314e-05	0.0148147	-0.429448	KBM7	NA	TRUE	34829	0.06114	Cells_EBV-transformed_lymphocytes	21.94	Cells_Transformed_fibroblasts	0
rs3764021	12	9833627	CLECL1	12	9868456	9885895	Lung	2.63384e-21	8.95388e-18	-0.552706	KBM7	NA	TRUE	34829	0.3212	Cells_EBV-transformed_lymphocytes	21.94	Cells_Transformed_fibroblasts	0
rs3764021	12	9833627	CLECL1	12	9868456	9885895	Nerve_Tibial	2.44353e-27	1.28943e-23	-0.729634	KBM7	NA	TRUE	34829	0.1738	Cells_EBV-transformed_lymphocytes	21.94	Cells_Transformed_fibroblasts	0
rs3764021	12	9833627	CLECL1	12	9868456	9885895	Pancreas	1.27112e-07	7.7218e-05	-0.463026	KBM7	NA	TRUE	34829	0.03337	Cells_EBV-transformed_lymphocytes	21.94	Cells_Transformed_fibroblasts	0
rs3764021	12	9833627	CLECL1	12	9868456	9885895	Pituitary	3.90304e-06	0.00165857	-0.458737	KBM7	NA	TRUE	34829	0.07295	Cells_EBV-transformed_lymphocytes	21.94	Cells_Transformed_fibroblasts	0
rs3764021	12	9833627	CLECL1	12	9868456	9885895	Prostate	4.8489e-08	3.1984e-05	-0.550155	KBM7	NA	TRUE	34829	0.1364	Cells_EBV-transformed_lymphocytes	21.94	Cells_Transformed_fibroblasts	0
rs3764021	12	9833627	CLECL1	12	9868456	9885895	Skin_Not_Sun_Exposed_Suprapubic	9.04777e-12	1.13034e-08	-0.485312	KBM7	NA	TRUE	34829	0.06501	Cells_EBV-transformed_lymphocytes	21.94	Cells_Transformed_fibroblasts	0
rs3764021	12	9833627	CLECL1	12	9868456	9885895	Skin_Sun_Exposed_Lower_leg	7.49442e-09	5.88816e-06	-0.396327	KBM7	NA	TRUE	34829	0.06361	Cells_EBV-transformed_lymphocytes	21.94	Cells_Transformed_fibroblasts	0
rs3764021	12	9833627	CLECL1	12	9868456	9885895	Spleen	1.15871e-08	8.71626e-06	-0.396894	KBM7	NA	TRUE	34829	3.39	Cells_EBV-transformed_lymphocytes	21.94	Cells_Transformed_fibroblasts	0
rs3764021	12	9833627	CLECL1	12	9868456	9885895	Stomach	5.2704e-05	0.016161	-0.295831	KBM7	NA	TRUE	34829	0.1323	Cells_EBV-transformed_lymphocytes	21.94	Cells_Transformed_fibroblasts	0
rs3764021	12	9833627	CLECL1	12	9868456	9885895	Testis	2.51755e-06	0.00113387	-0.456922	KBM7	NA	TRUE	34829	0.1685	Cells_EBV-transformed_lymphocytes	21.94	Cells_Transformed_fibroblasts	0
rs3764021	12	9833627	CLECL1	12	9868456	9885895	Thyroid	5.23878e-06	0.0021314	-0.231919	KBM7	NA	TRUE	34829	0.09106	Cells_EBV-transformed_lymphocytes	21.94	Cells_Transformed_fibroblasts	0
rs3764021	12	9833627	CLECL1	12	9868456	9885895	Whole_Blood	0.000107262	0.0290818	-0.236072	KBM7	NA	TRUE	34829	0.1753	Cells_EBV-transformed_lymphocytes	21.94	Cells_Transformed_fibroblasts	0
rs3764021	12	9833627	KLRB1	12	9747147	9760482	Testis	2.43635e-06	0.00110292	0.447331	KBM7	NA	TRUE	73145	0.1544	Spleen	15.39	Cells_Transformed_fibroblasts	0
rs3764021	12	9833627	RP11-705C15.2	12	9787188	9811008	Adipose_Subcutaneous	8.26935e-07	0.000417069	0.221321	KBM7	NA	TRUE	22619	1.598	Cells_EBV-transformed_lymphocytes	5.767	Brain_Cerebellar_Hemisphere	0.1274
rs3764021	12	9833627	RP11-705C15.2	12	9787188	9811008	Adipose_Visceral_Omentum	1.68529e-05	0.00597033	0.176841	KBM7	NA	TRUE	22619	1.696	Cells_EBV-transformed_lymphocytes	5.767	Brain_Cerebellar_Hemisphere	0.1274
rs3764021	12	9833627	RP11-705C15.2	12	9787188	9811008	Artery_Tibial	6.68287e-05	0.0197554	0.18581	KBM7	NA	TRUE	22619	1.203	Cells_EBV-transformed_lymphocytes	5.767	Brain_Cerebellar_Hemisphere	0.1274
rs3764021	12	9833627	RP11-705C15.2	12	9787188	9811008	Cells_Transformed_fibroblasts	4.28382e-05	0.0134747	0.272351	KBM7	NA	TRUE	22619	1.698	Cells_EBV-transformed_lymphocytes	5.767	Brain_Cerebellar_Hemisphere	0.1274
rs3764021	12	9833627	RP11-705C15.2	12	9787188	9811008	Nerve_Tibial	3.77417e-05	0.0120757	0.247703	KBM7	NA	TRUE	22619	2.266	Cells_EBV-transformed_lymphocytes	5.767	Brain_Cerebellar_Hemisphere	0.1274
rs3764021	12	9833627	RP11-705C15.2	12	9787188	9811008	Testis	2.78178e-07	0.000156859	0.380508	KBM7	NA	TRUE	22619	2.116	Cells_EBV-transformed_lymphocytes	5.767	Brain_Cerebellar_Hemisphere	0.1274
rs3764021	12	9833627	RP11-705C15.2	12	9787188	9811008	Thyroid	1.61164e-05	0.00573241	0.158717	KBM7	NA	TRUE	22619	1.328	Cells_EBV-transformed_lymphocytes	5.767	Brain_Cerebellar_Hemisphere	0.1274
rs3764021	12	9833627	RP11-705C15.3	12	9811163	9814681	Nerve_Tibial	5.87583e-05	0.0176952	0.238758	KBM7	NA	TRUE	18946	1.278	Spleen	3.02	Brain_Cerebellar_Hemisphere	0.06046
rs3764021	12	9833627	RP11-75L1.2	12	9847980	9848823	Adipose_Subcutaneous	0.000111698	0.0299404	-0.173638	KBM7	NA	TRUE	14353	10.96	Cells_EBV-transformed_lymphocytes	85.03	Brain_Anterior_cingulate_cortex_BA24	3.187
rs3764021	12	9833627	RP11-75L1.2	12	9847980	9848823	Artery_Tibial	0.00017699	0.0438509	-0.16634	KBM7	NA	TRUE	14353	8.422	Cells_EBV-transformed_lymphocytes	85.03	Brain_Anterior_cingulate_cortex_BA24	3.187
rs3764021	12	9833627	RP11-75L1.2	12	9847980	9848823	Heart_Left_Ventricle	9.73023e-05	0.0268496	-0.175502	KBM7	NA	TRUE	14353	5.089	Cells_EBV-transformed_lymphocytes	85.03	Brain_Anterior_cingulate_cortex_BA24	3.187
rs3764021	12	9833627	RP11-75L1.2	12	9847980	9848823	Lung	1.73153e-11	2.08938e-08	-0.248211	KBM7	NA	TRUE	14353	13.76	Cells_EBV-transformed_lymphocytes	85.03	Brain_Anterior_cingulate_cortex_BA24	3.187
rs3764021	12	9833627	RP11-75L1.2	12	9847980	9848823	Pancreas	2.16652e-06	0.000992201	-0.337515	KBM7	NA	TRUE	14353	7.944	Cells_EBV-transformed_lymphocytes	85.03	Brain_Anterior_cingulate_cortex_BA24	3.187
rs3764021	12	9833627	RP11-75L1.2	12	9847980	9848823	Skin_Sun_Exposed_Lower_leg	6.71461e-05	0.0198112	-0.169037	KBM7	NA	TRUE	14353	7.489	Cells_EBV-transformed_lymphocytes	85.03	Brain_Anterior_cingulate_cortex_BA24	3.187
rs3764021	12	9833627	RP11-75L1.2	12	9847980	9848823	Whole_Blood	1.48083e-15	3.00891e-12	-0.34496	KBM7	NA	TRUE	14353	11.03	Cells_EBV-transformed_lymphocytes	85.03	Brain_Anterior_cingulate_cortex_BA24	3.187
rs3788013	21	43841327	SLC37A1	21	43916118	44001550	Muscle_Skeletal	6.43305e-05	0.0190967	0.175476	KBM7	NA	TRUE	74791	1.712	Small_Intestine_Terminal_Ileum	14.69	Cells_Transformed_fibroblasts	0.3528
rs3825932	15	79235445	ADAMTS7	15	79051545	79103773	Artery_Tibial	2.07289e-06	0.000953024	0.183664	KBM7	NA	TRUE	131672	3.539	Heart_Atrial_Appendage	15.16	Whole_Blood	0.03521
rs3825932	15	79235445	CTSH	15	79213400	79241916	Adrenal_Gland	1.09295e-06	0.000535203	0.450694	KBM7	NA	TRUE	0	18.11	Cells_EBV-transformed_lymphocytes	102.5	Cells_Transformed_fibroblasts	1.43
rs3825932	15	79235445	CTSH	15	79213400	79241916	Artery_Aorta	9.55322e-07	0.000475045	0.281045	KBM7	NA	TRUE	0	9.962	Cells_EBV-transformed_lymphocytes	102.5	Cells_Transformed_fibroblasts	1.43
rs3825932	15	79235445	CTSH	15	79213400	79241916	Cells_EBV-transformed_lymphocytes	5.57253e-14	9.38184e-11	0.651722	KBM7	NA	TRUE	0	102.5	Cells_EBV-transformed_lymphocytes	102.5	Cells_Transformed_fibroblasts	1.43
rs3825932	15	79235445	CTSH	15	79213400	79241916	Cells_Transformed_fibroblasts	1.51973e-23	5.97004e-20	0.58781	KBM7	NA	TRUE	0	1.43	Cells_EBV-transformed_lymphocytes	102.5	Cells_Transformed_fibroblasts	1.43
rs3825932	15	79235445	CTSH	15	79213400	79241916	Esophagus_Mucosa	3.46668e-15	6.8092e-12	0.456688	KBM7	NA	TRUE	0	10.91	Cells_EBV-transformed_lymphocytes	102.5	Cells_Transformed_fibroblasts	1.43
rs3825932	15	79235445	CTSH	15	79213400	79241916	Heart_Atrial_Appendage	3.78313e-07	0.00020641	0.416497	KBM7	NA	TRUE	0	9.787	Cells_EBV-transformed_lymphocytes	102.5	Cells_Transformed_fibroblasts	1.43
rs3825932	15	79235445	CTSH	15	79213400	79241916	Liver	1.67909e-10	1.72072e-07	0.492906	KBM7	NA	TRUE	0	14.99	Cells_EBV-transformed_lymphocytes	102.5	Cells_Transformed_fibroblasts	1.43
rs3825932	15	79235445	CTSH	15	79213400	79241916	Lung	0.000102143	0.0279946	0.115573	KBM7	NA	TRUE	0	93.94	Cells_EBV-transformed_lymphocytes	102.5	Cells_Transformed_fibroblasts	1.43
rs3825932	15	79235445	CTSH	15	79213400	79241916	Minor_Salivary_Gland	0.000109714	0.0295386	0.418583	KBM7	NA	TRUE	0	19.79	Cells_EBV-transformed_lymphocytes	102.5	Cells_Transformed_fibroblasts	1.43
rs3825932	15	79235445	CTSH	15	79213400	79241916	Muscle_Skeletal	7.7639e-16	1.6339e-12	0.439434	KBM7	NA	TRUE	0	2.835	Cells_EBV-transformed_lymphocytes	102.5	Cells_Transformed_fibroblasts	1.43
rs3825932	15	79235445	CTSH	15	79213400	79241916	Pancreas	2.70727e-05	0.00907264	0.313242	KBM7	NA	TRUE	0	11.98	Cells_EBV-transformed_lymphocytes	102.5	Cells_Transformed_fibroblasts	1.43
rs3825932	15	79235445	CTSH	15	79213400	79241916	Spleen	3.506e-07	0.000193378	0.48823	KBM7	NA	TRUE	0	36.63	Cells_EBV-transformed_lymphocytes	102.5	Cells_Transformed_fibroblasts	1.43
rs3825932	15	79235445	CTSH	15	79213400	79241916	Testis	1.2389e-06	0.000597568	0.379903	KBM7	NA	TRUE	0	6.56	Cells_EBV-transformed_lymphocytes	102.5	Cells_Transformed_fibroblasts	1.43
rs3825932	15	79235445	CTSH	15	79213400	79241916	Thyroid	3.09515e-07	0.000172875	0.291447	KBM7	NA	TRUE	0	14.36	Cells_EBV-transformed_lymphocytes	102.5	Cells_Transformed_fibroblasts	1.43
rs3825932	15	79235445	CTSH	15	79213400	79241916	Whole_Blood	1.96401e-13	3.01905e-10	0.277836	KBM7	NA	TRUE	0	25.39	Cells_EBV-transformed_lymphocytes	102.5	Cells_Transformed_fibroblasts	1.43
rs416603	16	11364078	RMI2	16	11343476	11445619	Adipose_Subcutaneous	8.03515e-12	1.01098e-08	0.343618	KBM7	NA	TRUE	0	0.2939	Cells_EBV-transformed_lymphocytes	11.46	Brain_Cerebellar_Hemisphere	0.06741
rs416603	16	11364078	RMI2	16	11343476	11445619	Adipose_Visceral_Omentum	2.1934e-13	3.3426e-10	0.413622	KBM7	NA	TRUE	0	0.3163	Cells_EBV-transformed_lymphocytes	11.46	Brain_Cerebellar_Hemisphere	0.06741
rs416603	16	11364078	RMI2	16	11343476	11445619	Adrenal_Gland	9.3342e-12	1.15389e-08	0.585062	KBM7	NA	TRUE	0	0.531	Cells_EBV-transformed_lymphocytes	11.46	Brain_Cerebellar_Hemisphere	0.06741
rs416603	16	11364078	RMI2	16	11343476	11445619	Artery_Aorta	1.20778e-16	2.77282e-13	0.564056	KBM7	NA	TRUE	0	0.2036	Cells_EBV-transformed_lymphocytes	11.46	Brain_Cerebellar_Hemisphere	0.06741
rs416603	16	11364078	RMI2	16	11343476	11445619	Artery_Coronary	2.65108e-07	0.000150691	0.422341	KBM7	NA	TRUE	0	0.2913	Cells_EBV-transformed_lymphocytes	11.46	Brain_Cerebellar_Hemisphere	0.06741
rs416603	16	11364078	RMI2	16	11343476	11445619	Artery_Tibial	4.73757e-24	1.92527e-20	0.577333	KBM7	NA	TRUE	0	0.12	Cells_EBV-transformed_lymphocytes	11.46	Brain_Cerebellar_Hemisphere	0.06741
rs416603	16	11364078	RMI2	16	11343476	11445619	Brain_Amygdala	9.21e-08	5.73279e-05	0.594312	KBM7	NA	TRUE	0	0.632	Cells_EBV-transformed_lymphocytes	11.46	Brain_Cerebellar_Hemisphere	0.06741
rs416603	16	11364078	RMI2	16	11343476	11445619	Brain_Anterior_cingulate_cortex_BA24	6.4675e-12	8.25488e-09	0.726216	KBM7	NA	TRUE	0	0.678	Cells_EBV-transformed_lymphocytes	11.46	Brain_Cerebellar_Hemisphere	0.06741
rs416603	16	11364078	RMI2	16	11343476	11445619	Brain_Caudate_basal_ganglia	3.30362e-16	7.20991e-13	0.579767	KBM7	NA	TRUE	0	0.7058	Cells_EBV-transformed_lymphocytes	11.46	Brain_Cerebellar_Hemisphere	0.06741
rs416603	16	11364078	RMI2	16	11343476	11445619	Brain_Cerebellar_Hemisphere	3.72526e-05	0.0119408	0.476768	KBM7	NA	TRUE	0	0.06741	Cells_EBV-transformed_lymphocytes	11.46	Brain_Cerebellar_Hemisphere	0.06741
rs416603	16	11364078	RMI2	16	11343476	11445619	Brain_Cerebellum	1.19417e-07	7.30456e-05	0.576581	KBM7	NA	TRUE	0	0.08659	Cells_EBV-transformed_lymphocytes	11.46	Brain_Cerebellar_Hemisphere	0.06741
rs416603	16	11364078	RMI2	16	11343476	11445619	Brain_Cortex	1.82687e-16	4.06224e-13	0.785189	KBM7	NA	TRUE	0	0.9339	Cells_EBV-transformed_lymphocytes	11.46	Brain_Cerebellar_Hemisphere	0.06741
rs416603	16	11364078	RMI2	16	11343476	11445619	Brain_Frontal_Cortex_BA9	2.79011e-12	3.70846e-09	0.750739	KBM7	NA	TRUE	0	1.028	Cells_EBV-transformed_lymphocytes	11.46	Brain_Cerebellar_Hemisphere	0.06741
rs416603	16	11364078	RMI2	16	11343476	11445619	Brain_Hippocampus	3.3336e-06	0.00144437	0.476454	KBM7	NA	TRUE	0	0.4541	Cells_EBV-transformed_lymphocytes	11.46	Brain_Cerebellar_Hemisphere	0.06741
rs416603	16	11364078	RMI2	16	11343476	11445619	Brain_Hypothalamus	1.4049e-05	0.00507362	0.589501	KBM7	NA	TRUE	0	0.3271	Cells_EBV-transformed_lymphocytes	11.46	Brain_Cerebellar_Hemisphere	0.06741
rs416603	16	11364078	RMI2	16	11343476	11445619	Brain_Nucleus_accumbens_basal_ganglia	1.32244e-10	1.37515e-07	0.546968	KBM7	NA	TRUE	0	1.11	Cells_EBV-transformed_lymphocytes	11.46	Brain_Cerebellar_Hemisphere	0.06741
rs416603	16	11364078	RMI2	16	11343476	11445619	Brain_Putamen_basal_ganglia	6.99872e-14	1.17271e-10	0.639836	KBM7	NA	TRUE	0	0.5406	Cells_EBV-transformed_lymphocytes	11.46	Brain_Cerebellar_Hemisphere	0.06741
rs416603	16	11364078	RMI2	16	11343476	11445619	Breast_Mammary_Tissue	1.59841e-16	3.5995e-13	0.544681	KBM7	NA	TRUE	0	0.344	Cells_EBV-transformed_lymphocytes	11.46	Brain_Cerebellar_Hemisphere	0.06741
rs416603	16	11364078	RMI2	16	11343476	11445619	Cells_EBV-transformed_lymphocytes	0.00011474	0.0305932	-0.309581	KBM7	NA	TRUE	0	11.46	Cells_EBV-transformed_lymphocytes	11.46	Brain_Cerebellar_Hemisphere	0.06741
rs416603	16	11364078	RMI2	16	11343476	11445619	Colon_Sigmoid	2.00881e-20	6.45655e-17	0.726483	KBM7	NA	TRUE	0	0.2963	Cells_EBV-transformed_lymphocytes	11.46	Brain_Cerebellar_Hemisphere	0.06741
rs416603	16	11364078	RMI2	16	11343476	11445619	Esophagus_Gastroesophageal_Junction	4.44701e-16	9.53444e-13	0.566784	KBM7	NA	TRUE	0	0.1838	Cells_EBV-transformed_lymphocytes	11.46	Brain_Cerebellar_Hemisphere	0.06741
rs416603	16	11364078	RMI2	16	11343476	11445619	Esophagus_Muscularis	5.91831e-26	2.7532e-22	0.602441	KBM7	NA	TRUE	0	0.1691	Cells_EBV-transformed_lymphocytes	11.46	Brain_Cerebellar_Hemisphere	0.06741
rs416603	16	11364078	RMI2	16	11343476	11445619	Heart_Atrial_Appendage	2.24671e-12	3.04341e-09	0.462099	KBM7	NA	TRUE	0	0.1404	Cells_EBV-transformed_lymphocytes	11.46	Brain_Cerebellar_Hemisphere	0.06741
rs416603	16	11364078	RMI2	16	11343476	11445619	Heart_Left_Ventricle	5.25811e-19	1.54918e-15	0.574911	KBM7	NA	TRUE	0	0.1302	Cells_EBV-transformed_lymphocytes	11.46	Brain_Cerebellar_Hemisphere	0.06741
rs416603	16	11364078	RMI2	16	11343476	11445619	Liver	8.72907e-06	0.00337658	0.313124	KBM7	NA	TRUE	0	0.1593	Cells_EBV-transformed_lymphocytes	11.46	Brain_Cerebellar_Hemisphere	0.06741
rs416603	16	11364078	RMI2	16	11343476	11445619	Lung	2.20946e-10	2.2192e-07	0.251506	KBM7	NA	TRUE	0	0.5985	Cells_EBV-transformed_lymphocytes	11.46	Brain_Cerebellar_Hemisphere	0.06741
rs416603	16	11364078	RMI2	16	11343476	11445619	Muscle_Skeletal	4.91881e-26	2.31875e-22	0.484365	KBM7	NA	TRUE	0	0.08215	Cells_EBV-transformed_lymphocytes	11.46	Brain_Cerebellar_Hemisphere	0.06741
rs416603	16	11364078	RMI2	16	11343476	11445619	Nerve_Tibial	2.9124e-27	1.51425e-23	0.635129	KBM7	NA	TRUE	0	0.6166	Cells_EBV-transformed_lymphocytes	11.46	Brain_Cerebellar_Hemisphere	0.06741
rs416603	16	11364078	RMI2	16	11343476	11445619	Ovary	3.82277e-14	6.61173e-11	0.706527	KBM7	NA	TRUE	0	1.211	Cells_EBV-transformed_lymphocytes	11.46	Brain_Cerebellar_Hemisphere	0.06741
rs416603	16	11364078	RMI2	16	11343476	11445619	Pancreas	5.61018e-09	4.52853e-06	0.412187	KBM7	NA	TRUE	0	0.2465	Cells_EBV-transformed_lymphocytes	11.46	Brain_Cerebellar_Hemisphere	0.06741
rs416603	16	11364078	RMI2	16	11343476	11445619	Pituitary	1.98011e-14	3.53572e-11	0.747727	KBM7	NA	TRUE	0	0.2473	Cells_EBV-transformed_lymphocytes	11.46	Brain_Cerebellar_Hemisphere	0.06741
rs416603	16	11364078	RMI2	16	11343476	11445619	Prostate	4.8213e-06	0.0019966	0.407086	KBM7	NA	TRUE	0	0.6315	Cells_EBV-transformed_lymphocytes	11.46	Brain_Cerebellar_Hemisphere	0.06741
rs416603	16	11364078	RMI2	16	11343476	11445619	Skin_Not_Sun_Exposed_Suprapubic	9.46728e-17	2.21668e-13	0.404337	KBM7	NA	TRUE	0	2.601	Cells_EBV-transformed_lymphocytes	11.46	Brain_Cerebellar_Hemisphere	0.06741
rs416603	16	11364078	RMI2	16	11343476	11445619	Skin_Sun_Exposed_Lower_leg	1.83418e-10	1.86345e-07	0.238521	KBM7	NA	TRUE	0	2.719	Cells_EBV-transformed_lymphocytes	11.46	Brain_Cerebellar_Hemisphere	0.06741
rs416603	16	11364078	RMI2	16	11343476	11445619	Spleen	9.7139e-05	0.0268447	0.334415	KBM7	NA	TRUE	0	1.364	Cells_EBV-transformed_lymphocytes	11.46	Brain_Cerebellar_Hemisphere	0.06741
rs416603	16	11364078	RMI2	16	11343476	11445619	Stomach	2.35296e-09	2.03398e-06	0.250427	KBM7	NA	TRUE	0	0.5659	Cells_EBV-transformed_lymphocytes	11.46	Brain_Cerebellar_Hemisphere	0.06741
rs416603	16	11364078	RMI2	16	11343476	11445619	Thyroid	2.28954e-40	2.24854e-36	0.66057	KBM7	NA	TRUE	0	0.3957	Cells_EBV-transformed_lymphocytes	11.46	Brain_Cerebellar_Hemisphere	0.06741
rs416603	16	11364078	RMI2	16	11343476	11445619	Uterus	2.18173e-12	2.96675e-09	0.747724	KBM7	NA	TRUE	0	0.3298	Cells_EBV-transformed_lymphocytes	11.46	Brain_Cerebellar_Hemisphere	0.06741
rs416603	16	11364078	RMI2	16	11343476	11445619	Vagina	0.000202118	0.0490455	0.239718	KBM7	NA	TRUE	0	1.503	Cells_EBV-transformed_lymphocytes	11.46	Brain_Cerebellar_Hemisphere	0.06741
rs4246905	9	117553248	TNFSF15	9	117546915	117568406	Whole_Blood	8.24922e-05	0.0235966	-0.195353	KBM7	NA	TRUE	0	0.0275	Minor_Salivary_Gland	1.747	Brain_Cerebellar_Hemisphere	0
rs425105	19	47208480	PRKD2	19	47177532	47220384	Adipose_Subcutaneous	8.0478e-09	6.28107e-06	0.219691	KBM7	NA	TRUE	0	15.82	Spleen	34.9	Brain_Cerebellar_Hemisphere	0.826
rs425105	19	47208480	PRKD2	19	47177532	47220384	Adrenal_Gland	5.55389e-05	0.0168839	0.416982	KBM7	NA	TRUE	0	6.302	Spleen	34.9	Brain_Cerebellar_Hemisphere	0.826
rs425105	19	47208480	PRKD2	19	47177532	47220384	Artery_Aorta	5.45816e-07	0.000287593	0.329192	KBM7	NA	TRUE	0	8.12	Spleen	34.9	Brain_Cerebellar_Hemisphere	0.826
rs425105	19	47208480	PRKD2	19	47177532	47220384	Artery_Coronary	1.32198e-05	0.00486357	0.344863	KBM7	NA	TRUE	0	8.485	Spleen	34.9	Brain_Cerebellar_Hemisphere	0.826
rs425105	19	47208480	PRKD2	19	47177532	47220384	Artery_Tibial	5.8664e-17	1.42061e-13	0.288447	KBM7	NA	TRUE	0	6.853	Spleen	34.9	Brain_Cerebellar_Hemisphere	0.826
rs425105	19	47208480	PRKD2	19	47177532	47220384	Brain_Amygdala	3.6379e-05	0.0117139	0.506396	KBM7	NA	TRUE	0	2.242	Spleen	34.9	Brain_Cerebellar_Hemisphere	0.826
rs425105	19	47208480	PRKD2	19	47177532	47220384	Brain_Anterior_cingulate_cortex_BA24	4.11188e-07	0.000223657	0.504237	KBM7	NA	TRUE	0	2.079	Spleen	34.9	Brain_Cerebellar_Hemisphere	0.826
rs425105	19	47208480	PRKD2	19	47177532	47220384	Brain_Cerebellum	0.000173479	0.0431626	0.242494	KBM7	NA	TRUE	0	1.344	Spleen	34.9	Brain_Cerebellar_Hemisphere	0.826
rs425105	19	47208480	PRKD2	19	47177532	47220384	Brain_Cortex	1.6154e-06	0.000760491	0.48446	KBM7	NA	TRUE	0	2.881	Spleen	34.9	Brain_Cerebellar_Hemisphere	0.826
rs425105	19	47208480	PRKD2	19	47177532	47220384	Brain_Frontal_Cortex_BA9	0.000110026	0.0295593	0.374632	KBM7	NA	TRUE	0	2.094	Spleen	34.9	Brain_Cerebellar_Hemisphere	0.826
rs425105	19	47208480	PRKD2	19	47177532	47220384	Cells_EBV-transformed_lymphocytes	7.84432e-05	0.0226769	0.434374	KBM7	NA	TRUE	0	22.93	Spleen	34.9	Brain_Cerebellar_Hemisphere	0.826
rs425105	19	47208480	PRKD2	19	47177532	47220384	Cells_Transformed_fibroblasts	2.05109e-21	7.10952e-18	0.498679	KBM7	NA	TRUE	0	4.751	Spleen	34.9	Brain_Cerebellar_Hemisphere	0.826
rs425105	19	47208480	PRKD2	19	47177532	47220384	Colon_Sigmoid	5.60944e-08	3.61904e-05	0.396711	KBM7	NA	TRUE	0	7.653	Spleen	34.9	Brain_Cerebellar_Hemisphere	0.826
rs425105	19	47208480	PRKD2	19	47177532	47220384	Esophagus_Gastroesophageal_Junction	4.01422e-05	0.0127648	0.266647	KBM7	NA	TRUE	0	7.36	Spleen	34.9	Brain_Cerebellar_Hemisphere	0.826
rs425105	19	47208480	PRKD2	19	47177532	47220384	Esophagus_Muscularis	7.52738e-15	1.4007e-11	0.392715	KBM7	NA	TRUE	0	7.141	Spleen	34.9	Brain_Cerebellar_Hemisphere	0.826
rs425105	19	47208480	PRKD2	19	47177532	47220384	Heart_Atrial_Appendage	2.38776e-09	2.05402e-06	0.314496	KBM7	NA	TRUE	0	4.562	Spleen	34.9	Brain_Cerebellar_Hemisphere	0.826
rs425105	19	47208480	PRKD2	19	47177532	47220384	Heart_Left_Ventricle	3.35989e-09	2.81682e-06	0.247809	KBM7	NA	TRUE	0	3.343	Spleen	34.9	Brain_Cerebellar_Hemisphere	0.826
rs425105	19	47208480	PRKD2	19	47177532	47220384	Liver	7.14093e-05	0.0209518	0.352835	KBM7	NA	TRUE	0	4.38	Spleen	34.9	Brain_Cerebellar_Hemisphere	0.826
rs425105	19	47208480	PRKD2	19	47177532	47220384	Lung	8.97088e-08	5.61359e-05	0.190333	KBM7	NA	TRUE	0	17.58	Spleen	34.9	Brain_Cerebellar_Hemisphere	0.826
rs425105	19	47208480	PRKD2	19	47177532	47220384	Muscle_Skeletal	4.81499e-15	9.25193e-12	0.360406	KBM7	NA	TRUE	0	2.086	Spleen	34.9	Brain_Cerebellar_Hemisphere	0.826
rs425105	19	47208480	PRKD2	19	47177532	47220384	Nerve_Tibial	2.20033e-21	7.55275e-18	0.468496	KBM7	NA	TRUE	0	12.02	Spleen	34.9	Brain_Cerebellar_Hemisphere	0.826
rs425105	19	47208480	PRKD2	19	47177532	47220384	Pancreas	2.28429e-05	0.00780307	0.347615	KBM7	NA	TRUE	0	6.88	Spleen	34.9	Brain_Cerebellar_Hemisphere	0.826
rs425105	19	47208480	PRKD2	19	47177532	47220384	Pituitary	3.4308e-07	0.000189527	0.420309	KBM7	NA	TRUE	0	15.92	Spleen	34.9	Brain_Cerebellar_Hemisphere	0.826
rs425105	19	47208480	PRKD2	19	47177532	47220384	Stomach	3.1311e-06	0.00136837	0.238604	KBM7	NA	TRUE	0	10.38	Spleen	34.9	Brain_Cerebellar_Hemisphere	0.826
rs425105	19	47208480	PRKD2	19	47177532	47220384	Thyroid	1.08385e-13	1.74181e-10	0.30873	KBM7	NA	TRUE	0	18.4	Spleen	34.9	Brain_Cerebellar_Hemisphere	0.826
rs425105	19	47208480	PRKD2	19	47177532	47220384	Whole_Blood	3.59926e-14	6.3201e-11	0.209037	KBM7	NA	TRUE	0	29.69	Spleen	34.9	Brain_Cerebellar_Hemisphere	0.826
rs425105	19	47208480	SLC1A5	19	47278140	47291851	Cells_Transformed_fibroblasts	2.07005e-08	1.45791e-05	0.256484	NHEK	NA	TRUE	69660	97.44	Cells_Transformed_fibroblasts	97.44	Brain_Cerebellar_Hemisphere	0.1928
rs425105	19	47208480	STRN4	19	47222764	47250251	Skin_Not_Sun_Exposed_Suprapubic	1.21629e-05	0.00452178	0.182095	KBM7	NA	TRUE	14284	19.77	Testis	61.83	Liver	7.336
rs425105	19	47208480	STRN4	19	47222764	47250251	Skin_Sun_Exposed_Lower_leg	6.15124e-05	0.0184148	0.120484	KBM7	NA	TRUE	14284	20.83	Testis	61.83	Liver	7.336
rs4505848	4	123132491	KIAA1109	4	123073488	123283913	Brain_Cortex	6.80746e-05	0.0200566	-0.363272	KBM7	NA	TRUE	0	7.754	Pituitary	14.51	Whole_Blood	1.74
rs4625	3	49572139	AMT	3	49454211	49460186	Adipose_Subcutaneous	3.75346e-11	4.26703e-08	0.20604	KBM7	NA	TRUE	111953	10.3	Brain_Cerebellum	30.61	Whole_Blood	2.635
rs4625	3	49572139	AMT	3	49454211	49460186	Adipose_Visceral_Omentum	3.43662e-09	2.8724e-06	0.191096	KBM7	NA	TRUE	111953	8.073	Brain_Cerebellum	30.61	Whole_Blood	2.635
rs4625	3	49572139	AMT	3	49454211	49460186	Artery_Aorta	1.10893e-08	8.37645e-06	0.226043	KBM7	NA	TRUE	111953	13.66	Brain_Cerebellum	30.61	Whole_Blood	2.635
rs4625	3	49572139	AMT	3	49454211	49460186	Artery_Tibial	8.23754e-13	1.17436e-09	0.210935	KBM7	NA	TRUE	111953	10.15	Brain_Cerebellum	30.61	Whole_Blood	2.635
rs4625	3	49572139	AMT	3	49454211	49460186	Brain_Cerebellum	4.77037e-05	0.0148109	0.327902	KBM7	NA	TRUE	111953	30.61	Brain_Cerebellum	30.61	Whole_Blood	2.635
rs4625	3	49572139	AMT	3	49454211	49460186	Brain_Frontal_Cortex_BA9	4.04399e-06	0.00171434	0.296732	KBM7	NA	TRUE	111953	5.612	Brain_Cerebellum	30.61	Whole_Blood	2.635
rs4625	3	49572139	AMT	3	49454211	49460186	Brain_Nucleus_accumbens_basal_ganglia	7.12417e-05	0.02092	0.273225	KBM7	NA	TRUE	111953	8.55	Brain_Cerebellum	30.61	Whole_Blood	2.635
rs4625	3	49572139	AMT	3	49454211	49460186	Breast_Mammary_Tissue	1.27382e-06	0.000611077	0.156387	KBM7	NA	TRUE	111953	13.41	Brain_Cerebellum	30.61	Whole_Blood	2.635
rs4625	3	49572139	AMT	3	49454211	49460186	Cells_Transformed_fibroblasts	4.93862e-06	0.00203504	0.129688	KBM7	NA	TRUE	111953	2.897	Brain_Cerebellum	30.61	Whole_Blood	2.635
rs4625	3	49572139	AMT	3	49454211	49460186	Colon_Sigmoid	1.53491e-05	0.00548154	0.207353	KBM7	NA	TRUE	111953	16.38	Brain_Cerebellum	30.61	Whole_Blood	2.635
rs4625	3	49572139	AMT	3	49454211	49460186	Esophagus_Gastroesophageal_Junction	7.43966e-06	0.00292908	0.1693	KBM7	NA	TRUE	111953	13.22	Brain_Cerebellum	30.61	Whole_Blood	2.635
rs4625	3	49572139	AMT	3	49454211	49460186	Esophagus_Mucosa	2.53923e-08	1.75342e-05	0.166785	KBM7	NA	TRUE	111953	5.795	Brain_Cerebellum	30.61	Whole_Blood	2.635
rs4625	3	49572139	AMT	3	49454211	49460186	Esophagus_Muscularis	3.5718e-08	2.40537e-05	0.142131	KBM7	NA	TRUE	111953	10.75	Brain_Cerebellum	30.61	Whole_Blood	2.635
rs4625	3	49572139	AMT	3	49454211	49460186	Lung	1.01421e-11	1.24075e-08	0.207344	KBM7	NA	TRUE	111953	11.91	Brain_Cerebellum	30.61	Whole_Blood	2.635
rs4625	3	49572139	AMT	3	49454211	49460186	Muscle_Skeletal	1.13539e-07	6.9812e-05	0.118902	KBM7	NA	TRUE	111953	4.253	Brain_Cerebellum	30.61	Whole_Blood	2.635
rs4625	3	49572139	AMT	3	49454211	49460186	Nerve_Tibial	8.41566e-13	1.19493e-09	0.216365	KBM7	NA	TRUE	111953	16.12	Brain_Cerebellum	30.61	Whole_Blood	2.635
rs4625	3	49572139	AMT	3	49454211	49460186	Pituitary	5.65712e-05	0.0171535	0.291743	KBM7	NA	TRUE	111953	26.19	Brain_Cerebellum	30.61	Whole_Blood	2.635
rs4625	3	49572139	AMT	3	49454211	49460186	Skin_Not_Sun_Exposed_Suprapubic	7.03284e-07	0.000363521	0.188045	KBM7	NA	TRUE	111953	10.99	Brain_Cerebellum	30.61	Whole_Blood	2.635
rs4625	3	49572139	AMT	3	49454211	49460186	Skin_Sun_Exposed_Lower_leg	8.20181e-08	5.16894e-05	0.154955	KBM7	NA	TRUE	111953	9.388	Brain_Cerebellum	30.61	Whole_Blood	2.635
rs4625	3	49572139	AMT	3	49454211	49460186	Spleen	8.42432e-05	0.0240017	0.243682	KBM7	NA	TRUE	111953	16.3	Brain_Cerebellum	30.61	Whole_Blood	2.635
rs4625	3	49572139	AMT	3	49454211	49460186	Thyroid	9.1577e-12	1.14005e-08	0.235689	KBM7	NA	TRUE	111953	17.75	Brain_Cerebellum	30.61	Whole_Blood	2.635
rs4625	3	49572139	AMT	3	49454211	49460186	Vagina	0.000156574	0.0396542	0.204717	KBM7	NA	TRUE	111953	15.54	Brain_Cerebellum	30.61	Whole_Blood	2.635
rs4625	3	49572139	APEH	3	49711435	49721396	Adipose_Subcutaneous	1.09551e-09	1.00864e-06	0.144859	KBM7	NA	TRUE	139296	13.82	Pituitary	39.35	Brain_Spinal_cord_cervical_c-1	8.413
rs4625	3	49572139	APEH	3	49711435	49721396	Cells_Transformed_fibroblasts	6.16931e-10	5.83203e-07	0.179938	KBM7	NA	TRUE	139296	19.55	Pituitary	39.35	Brain_Spinal_cord_cervical_c-1	8.413
rs4625	3	49572139	APEH	3	49711435	49721396	Esophagus_Mucosa	5.84203e-09	4.70493e-06	0.179816	KBM7	NA	TRUE	139296	23.2	Pituitary	39.35	Brain_Spinal_cord_cervical_c-1	8.413
rs4625	3	49572139	APEH	3	49711435	49721396	Nerve_Tibial	9.22263e-07	0.0004612	0.134874	KBM7	NA	TRUE	139296	16.82	Pituitary	39.35	Brain_Spinal_cord_cervical_c-1	8.413
rs4625	3	49572139	DAG1	3	49506146	49573048	Cells_Transformed_fibroblasts	0.000124103	0.0325739	0.0881155	KBM7	NA	TRUE	0	15.6	Nerve_Tibial	41.34	Whole_Blood	0.6595
rs4625	3	49572139	QRICH1	3	49067140	49131796	Adipose_Subcutaneous	6.97705e-06	0.00276542	-0.168371	KBM7	NA	TRUE	440343	20.33	Testis	33.23	Brain_Substantia_nigra	6.06
rs4625	3	49572139	QRICH1	3	49067140	49131796	Pituitary	9.18463e-05	0.0256889	-0.231119	KBM7	NA	TRUE	440343	20.93	Testis	33.23	Brain_Substantia_nigra	6.06
rs4625	3	49572139	QRICH1	3	49067140	49131796	Skin_Sun_Exposed_Lower_leg	0.000103292	0.0282657	-0.10356	KBM7	NA	TRUE	440343	24.04	Testis	33.23	Brain_Substantia_nigra	6.06
rs4625	3	49572139	RBM6	3	49977440	50137478	Adipose_Subcutaneous	5.0904e-09	4.14684e-06	0.239732	KBM7	NA	TRUE	405301	29.7	Prostate	69.51	Muscle_Skeletal	11.69
rs4625	3	49572139	RBM6	3	49977440	50137478	Adipose_Visceral_Omentum	1.87959e-10	1.90412e-07	0.262662	KBM7	NA	TRUE	405301	31.71	Prostate	69.51	Muscle_Skeletal	11.69
rs4625	3	49572139	RBM6	3	49977440	50137478	Artery_Aorta	4.97028e-06	0.00204332	0.204756	KBM7	NA	TRUE	405301	36.56	Prostate	69.51	Muscle_Skeletal	11.69
rs4625	3	49572139	RBM6	3	49977440	50137478	Artery_Tibial	3.59898e-09	3.00102e-06	0.216376	KBM7	NA	TRUE	405301	29.89	Prostate	69.51	Muscle_Skeletal	11.69
rs4625	3	49572139	RBM6	3	49977440	50137478	Brain_Cerebellum	4.87059e-06	0.0020117	0.363173	KBM7	NA	TRUE	405301	44.76	Prostate	69.51	Muscle_Skeletal	11.69
rs4625	3	49572139	RBM6	3	49977440	50137478	Brain_Nucleus_accumbens_basal_ganglia	7.11175e-07	0.000365462	0.344754	KBM7	NA	TRUE	405301	15.86	Prostate	69.51	Muscle_Skeletal	11.69
rs4625	3	49572139	RBM6	3	49977440	50137478	Breast_Mammary_Tissue	1.24831e-07	7.5963e-05	0.269218	KBM7	NA	TRUE	405301	37.42	Prostate	69.51	Muscle_Skeletal	11.69
rs4625	3	49572139	RBM6	3	49977440	50137478	Cells_Transformed_fibroblasts	0.000168141	0.0421282	0.149924	KBM7	NA	TRUE	405301	15.36	Prostate	69.51	Muscle_Skeletal	11.69
rs4625	3	49572139	RBM6	3	49977440	50137478	Colon_Sigmoid	5.51547e-08	3.56549e-05	0.362546	KBM7	NA	TRUE	405301	46.69	Prostate	69.51	Muscle_Skeletal	11.69
rs4625	3	49572139	RBM6	3	49977440	50137478	Esophagus_Gastroesophageal_Junction	0.000101642	0.0278789	0.210376	KBM7	NA	TRUE	405301	46.8	Prostate	69.51	Muscle_Skeletal	11.69
rs4625	3	49572139	RBM6	3	49977440	50137478	Esophagus_Mucosa	1.79418e-12	2.46823e-09	0.244558	KBM7	NA	TRUE	405301	23.54	Prostate	69.51	Muscle_Skeletal	11.69
rs4625	3	49572139	RBM6	3	49977440	50137478	Esophagus_Muscularis	1.87916e-09	1.64451e-06	0.242679	KBM7	NA	TRUE	405301	42.56	Prostate	69.51	Muscle_Skeletal	11.69
rs4625	3	49572139	RBM6	3	49977440	50137478	Heart_Atrial_Appendage	3.30246e-08	2.24537e-05	0.24287	KBM7	NA	TRUE	405301	20.3	Prostate	69.51	Muscle_Skeletal	11.69
rs4625	3	49572139	RBM6	3	49977440	50137478	Heart_Left_Ventricle	9.25004e-06	0.00352412	0.175152	KBM7	NA	TRUE	405301	15.96	Prostate	69.51	Muscle_Skeletal	11.69
rs4625	3	49572139	RBM6	3	49977440	50137478	Lung	1.68932e-08	1.19932e-05	0.174769	KBM7	NA	TRUE	405301	42.31	Prostate	69.51	Muscle_Skeletal	11.69
rs4625	3	49572139	RBM6	3	49977440	50137478	Muscle_Skeletal	2.13362e-08	1.49672e-05	0.18624	KBM7	NA	TRUE	405301	11.69	Prostate	69.51	Muscle_Skeletal	11.69
rs4625	3	49572139	RBM6	3	49977440	50137478	Nerve_Tibial	1.15469e-10	1.21141e-07	0.21905	KBM7	NA	TRUE	405301	41.96	Prostate	69.51	Muscle_Skeletal	11.69
rs4625	3	49572139	RBM6	3	49977440	50137478	Pituitary	3.54653e-05	0.0114615	0.345263	KBM7	NA	TRUE	405301	52.03	Prostate	69.51	Muscle_Skeletal	11.69
rs4625	3	49572139	RBM6	3	49977440	50137478	Skin_Not_Sun_Exposed_Suprapubic	4.28012e-07	0.00023245	0.190879	KBM7	NA	TRUE	405301	29.87	Prostate	69.51	Muscle_Skeletal	11.69
rs4625	3	49572139	RBM6	3	49977440	50137478	Skin_Sun_Exposed_Lower_leg	8.90474e-14	1.45754e-10	0.240142	KBM7	NA	TRUE	405301	26.57	Prostate	69.51	Muscle_Skeletal	11.69
rs4625	3	49572139	RBM6	3	49977440	50137478	Stomach	5.55969e-05	0.016887	0.25032	KBM7	NA	TRUE	405301	30.57	Prostate	69.51	Muscle_Skeletal	11.69
rs4625	3	49572139	RBM6	3	49977440	50137478	Testis	5.45322e-07	0.000287593	0.226264	KBM7	NA	TRUE	405301	47.14	Prostate	69.51	Muscle_Skeletal	11.69
rs4625	3	49572139	RBM6	3	49977440	50137478	Thyroid	5.01509e-08	3.28352e-05	0.214297	KBM7	NA	TRUE	405301	53.76	Prostate	69.51	Muscle_Skeletal	11.69
rs4625	3	49572139	RBM6	3	49977440	50137478	Vagina	0.00011467	0.0305932	0.324098	KBM7	NA	TRUE	405301	43.63	Prostate	69.51	Muscle_Skeletal	11.69
rs4625	3	49572139	RBM6	3	49977440	50137478	Whole_Blood	1.60557e-08	1.14678e-05	0.236555	KBM7	NA	TRUE	405301	13.52	Prostate	69.51	Muscle_Skeletal	11.69
rs4625	3	49572139	RNF123	3	49726932	49758962	Adipose_Subcutaneous	1.17e-08	8.76389e-06	-0.213474	KBM7	NA	TRUE	154793	6.391	Muscle_Skeletal	32.37	Brain_Spinal_cord_cervical_c-1	2.763
rs4625	3	49572139	RNF123	3	49726932	49758962	Adipose_Visceral_Omentum	6.25107e-07	0.000325971	-0.19753	KBM7	NA	TRUE	154793	5.9	Muscle_Skeletal	32.37	Brain_Spinal_cord_cervical_c-1	2.763
rs4625	3	49572139	RNF123	3	49726932	49758962	Artery_Tibial	8.92353e-10	8.25901e-07	-0.190065	KBM7	NA	TRUE	154793	7.082	Muscle_Skeletal	32.37	Brain_Spinal_cord_cervical_c-1	2.763
rs4625	3	49572139	RNF123	3	49726932	49758962	Colon_Sigmoid	8.86242e-06	0.0034058	-0.172311	KBM7	NA	TRUE	154793	7.695	Muscle_Skeletal	32.37	Brain_Spinal_cord_cervical_c-1	2.763
rs4625	3	49572139	RNF123	3	49726932	49758962	Esophagus_Muscularis	1.99467e-07	0.000117146	-0.169925	KBM7	NA	TRUE	154793	8.365	Muscle_Skeletal	32.37	Brain_Spinal_cord_cervical_c-1	2.763
rs4625	3	49572139	RNF123	3	49726932	49758962	Heart_Atrial_Appendage	9.18819e-06	0.00350593	-0.13203	KBM7	NA	TRUE	154793	5.811	Muscle_Skeletal	32.37	Brain_Spinal_cord_cervical_c-1	2.763
rs4625	3	49572139	RNF123	3	49726932	49758962	Lung	7.72449e-09	6.05547e-06	-0.185927	KBM7	NA	TRUE	154793	7.083	Muscle_Skeletal	32.37	Brain_Spinal_cord_cervical_c-1	2.763
rs4625	3	49572139	RNF123	3	49726932	49758962	Nerve_Tibial	6.78066e-11	7.35376e-08	-0.29301	KBM7	NA	TRUE	154793	8.007	Muscle_Skeletal	32.37	Brain_Spinal_cord_cervical_c-1	2.763
rs4625	3	49572139	RNF123	3	49726932	49758962	Thyroid	4.77385e-05	0.0148109	-0.162281	KBM7	NA	TRUE	154793	8.665	Muscle_Skeletal	32.37	Brain_Spinal_cord_cervical_c-1	2.763
rs4676410	2	241563738	GPR35	2	241544848	241570676	Colon_Sigmoid	5.5097e-05	0.0167784	0.410709	KBM7	NA	TRUE	0	1.93	Small_Intestine_Terminal_Ileum	19.38	Cells_Transformed_fibroblasts	0.1099
rs4763879	12	9910163	CLECL1	12	9868456	9885895	Adipose_Subcutaneous	6.27505e-09	5.01938e-06	0.395329	KBM7	NA	TRUE	24268	0.1472	Cells_EBV-transformed_lymphocytes	21.94	Cells_Transformed_fibroblasts	0
rs4763879	12	9910163	CLECL1	12	9868456	9885895	Adipose_Visceral_Omentum	6.26578e-10	5.90743e-07	0.418774	KBM7	NA	TRUE	24268	0.1776	Cells_EBV-transformed_lymphocytes	21.94	Cells_Transformed_fibroblasts	0
rs4763879	12	9910163	CLECL1	12	9868456	9885895	Adrenal_Gland	1.53871e-08	1.11024e-05	0.557674	KBM7	NA	TRUE	24268	0.1486	Cells_EBV-transformed_lymphocytes	21.94	Cells_Transformed_fibroblasts	0
rs4763879	12	9910163	CLECL1	12	9868456	9885895	Artery_Aorta	3.31006e-07	0.000184007	0.390546	KBM7	NA	TRUE	24268	0.08542	Cells_EBV-transformed_lymphocytes	21.94	Cells_Transformed_fibroblasts	0
rs4763879	12	9910163	CLECL1	12	9868456	9885895	Artery_Coronary	9.20119e-05	0.0256889	0.34283	KBM7	NA	TRUE	24268	0.1315	Cells_EBV-transformed_lymphocytes	21.94	Cells_Transformed_fibroblasts	0
rs4763879	12	9910163	CLECL1	12	9868456	9885895	Artery_Tibial	5.39732e-07	0.000285238	0.335561	KBM7	NA	TRUE	24268	0.0384	Cells_EBV-transformed_lymphocytes	21.94	Cells_Transformed_fibroblasts	0
rs4763879	12	9910163	CLECL1	12	9868456	9885895	Brain_Caudate_basal_ganglia	6.94447e-05	0.0204263	0.443047	KBM7	NA	TRUE	24268	0.06398	Cells_EBV-transformed_lymphocytes	21.94	Cells_Transformed_fibroblasts	0
rs4763879	12	9910163	CLECL1	12	9868456	9885895	Brain_Hypothalamus	7.35496e-06	0.0029022	0.572884	KBM7	NA	TRUE	24268	0.06208	Cells_EBV-transformed_lymphocytes	21.94	Cells_Transformed_fibroblasts	0
rs4763879	12	9910163	CLECL1	12	9868456	9885895	Colon_Sigmoid	1.47548e-05	0.00529605	0.405032	KBM7	NA	TRUE	24268	0.05984	Cells_EBV-transformed_lymphocytes	21.94	Cells_Transformed_fibroblasts	0
rs4763879	12	9910163	CLECL1	12	9868456	9885895	Esophagus_Gastroesophageal_Junction	7.28446e-05	0.0213553	0.411809	KBM7	NA	TRUE	24268	0.05247	Cells_EBV-transformed_lymphocytes	21.94	Cells_Transformed_fibroblasts	0
rs4763879	12	9910163	CLECL1	12	9868456	9885895	Esophagus_Muscularis	6.00451e-05	0.0180366	0.309983	KBM7	NA	TRUE	24268	0.06023	Cells_EBV-transformed_lymphocytes	21.94	Cells_Transformed_fibroblasts	0
rs4763879	12	9910163	CLECL1	12	9868456	9885895	Heart_Atrial_Appendage	5.36377e-05	0.0164047	0.338113	KBM7	NA	TRUE	24268	0.0459	Cells_EBV-transformed_lymphocytes	21.94	Cells_Transformed_fibroblasts	0
rs4763879	12	9910163	CLECL1	12	9868456	9885895	Lung	5.39116e-12	6.93114e-09	0.46396	KBM7	NA	TRUE	24268	0.3212	Cells_EBV-transformed_lymphocytes	21.94	Cells_Transformed_fibroblasts	0
rs4763879	12	9910163	CLECL1	12	9868456	9885895	Nerve_Tibial	9.1991e-14	1.49191e-10	0.55451	KBM7	NA	TRUE	24268	0.1738	Cells_EBV-transformed_lymphocytes	21.94	Cells_Transformed_fibroblasts	0
rs4763879	12	9910163	CLECL1	12	9868456	9885895	Skin_Not_Sun_Exposed_Suprapubic	3.54797e-06	0.00152232	0.384025	KBM7	NA	TRUE	24268	0.06501	Cells_EBV-transformed_lymphocytes	21.94	Cells_Transformed_fibroblasts	0
rs4763879	12	9910163	CLECL1	12	9868456	9885895	Skin_Sun_Exposed_Lower_leg	3.0295e-05	0.0100195	0.312014	KBM7	NA	TRUE	24268	0.06361	Cells_EBV-transformed_lymphocytes	21.94	Cells_Transformed_fibroblasts	0
rs4763879	12	9910163	CLECL1	12	9868456	9885895	Thyroid	8.60578e-05	0.0243408	0.216654	KBM7	NA	TRUE	24268	0.09106	Cells_EBV-transformed_lymphocytes	21.94	Cells_Transformed_fibroblasts	0
rs4763879	12	9910163	KLRF1	12	9980077	9997606	Thyroid	3.34618e-05	0.0108937	0.254654	NHEK	NA	TRUE	69914	0.4594	Spleen	9.98	Cells_Transformed_fibroblasts	0.04105
rs478222	2	25301754	ADCY3	2	25042038	25142708	Adipose_Subcutaneous	8.3821e-06	0.0032602	-0.155024	KBM7	NA	TRUE	159046	25.29	Nerve_Tibial	37.1	Liver	0.6665
rs478222	2	25301754	ADCY3	2	25042038	25142708	Artery_Tibial	7.66156e-05	0.0222395	-0.164455	KBM7	NA	TRUE	159046	14.01	Nerve_Tibial	37.1	Liver	0.6665
rs478222	2	25301754	ADCY3	2	25042038	25142708	Cells_EBV-transformed_lymphocytes	3.42056e-05	0.0111051	0.330283	KBM7	NA	TRUE	159046	21.78	Nerve_Tibial	37.1	Liver	0.6665
rs478222	2	25301754	ADCY3	2	25042038	25142708	Nerve_Tibial	4.16306e-06	0.0017585	0.146209	KBM7	NA	TRUE	159046	37.1	Nerve_Tibial	37.1	Liver	0.6665
rs478222	2	25301754	ADCY3	2	25042038	25142708	Skin_Not_Sun_Exposed_Suprapubic	0.000119108	0.0315203	0.120304	KBM7	NA	TRUE	159046	9.447	Nerve_Tibial	37.1	Liver	0.6665
rs478222	2	25301754	ADCY3	2	25042038	25142708	Whole_Blood	5.55553e-17	1.3546e-13	-0.520661	KBM7	NA	TRUE	159046	1.635	Nerve_Tibial	37.1	Liver	0.6665
rs478222	2	25301754	DNAJC27	2	25166505	25194963	Whole_Blood	0.000124804	0.0326852	-0.189165	KBM7	NA	TRUE	106791	0.4252	Testis	11.95	Whole_Blood	0.4252
rs478222	2	25301754	DNAJC27-AS1	2	25194259	25262563	Brain_Cerebellar_Hemisphere	0.00012367	0.0324843	0.318054	KBM7	NA	TRUE	39191	1.16	Brain_Cerebellar_Hemisphere	1.16	Whole_Blood	0.04122
rs478222	2	25301754	DNAJC27-AS1	2	25194259	25262563	Esophagus_Muscularis	0.000119503	0.0316011	0.185945	KBM7	NA	TRUE	39191	0.1969	Brain_Cerebellar_Hemisphere	1.16	Whole_Blood	0.04122
rs478222	2	25301754	DNAJC27-AS1	2	25194259	25262563	Nerve_Tibial	8.18637e-05	0.0234548	0.145001	KBM7	NA	TRUE	39191	0.5055	Brain_Cerebellar_Hemisphere	1.16	Whole_Blood	0.04122
rs478222	2	25301754	NCOA1	2	24714783	24993571	Breast_Mammary_Tissue	0.000122566	0.0322664	-0.183357	KBM7	NA	TRUE	308183	12.08	Nerve_Tibial	16.32	Liver	3.487
rs478222	2	25301754	RP11-509E16.1	2	25380063	25382006	Adrenal_Gland	1.59551e-08	1.1419e-05	-0.349067	KBM7	NA	TRUE	78309	1.714	Brain_Putamen_basal_ganglia	47.32	Whole_Blood	0.03449
rs4788084	16	28539847	RABEP2	16	28915742	28947847	Adrenal_Gland	7.93747e-07	0.000403786	0.240476	HUVEC	NA	TRUE	375895	10.13	Spleen	20.45	Muscle_Skeletal	1.139
rs4788084	16	28539847	SBK1	16	28303840	28335170	Artery_Aorta	0.000113256	0.03027	-0.265544	HUVEC	NA	TRUE	204677	0.1165	Brain_Cerebellum	31.51	Cells_Transformed_fibroblasts	0.007334
rs4788084	16	28539847	SBK1	16	28303840	28335170	Esophagus_Muscularis	0.00014906	0.0381611	-0.244828	HUVEC	NA	TRUE	204677	0.1158	Brain_Cerebellum	31.51	Cells_Transformed_fibroblasts	0.007334
rs4788084	16	28539847	SBK1	16	28303840	28335170	Skin_Not_Sun_Exposed_Suprapubic	1.62582e-08	1.15889e-05	-0.25075	HUVEC	NA	TRUE	204677	0.6127	Brain_Cerebellum	31.51	Cells_Transformed_fibroblasts	0.007334
rs4788084	16	28539847	SBK1	16	28303840	28335170	Skin_Sun_Exposed_Lower_leg	5.51635e-08	3.56549e-05	-0.188935	HUVEC	NA	TRUE	204677	0.7176	Brain_Cerebellum	31.51	Cells_Transformed_fibroblasts	0.007334
rs4788084	16	28539847	SBK1	16	28303840	28335170	Stomach	0.000108775	0.029357	-0.149008	HUVEC	NA	TRUE	204677	0.5262	Brain_Cerebellum	31.51	Cells_Transformed_fibroblasts	0.007334
rs4788084	16	28539847	SBK1	16	28303840	28335170	Testis	0.000117138	0.0310454	-0.215221	HUVEC	NA	TRUE	204677	2.588	Brain_Cerebellum	31.51	Cells_Transformed_fibroblasts	0.007334
rs4869313	5	96223879	ERAP1	5	96096521	96143803	Cells_Transformed_fibroblasts	0.000124799	0.0326852	0.206623	IMR90	NA	TRUE	80076	7.946	Cells_EBV-transformed_lymphocytes	19.18	Brain_Anterior_cingulate_cortex_BA24	1.414
rs4869313	5	96223879	ERAP2	5	96211643	96255420	Adipose_Subcutaneous	2.29292e-117	4.05334e-112	-1.03625	KBM7	NA	TRUE	0	4.604	Cells_EBV-transformed_lymphocytes	14.78	Brain_Cerebellar_Hemisphere	0.2764
rs4869313	5	96223879	ERAP2	5	96211643	96255420	Adipose_Visceral_Omentum	1.22534e-95	5.4153e-91	-1.049	KBM7	NA	TRUE	0	4.243	Cells_EBV-transformed_lymphocytes	14.78	Brain_Cerebellar_Hemisphere	0.2764
rs4869313	5	96223879	ERAP2	5	96211643	96255420	Adrenal_Gland	3.28592e-43	3.52045e-39	-1.09278	KBM7	NA	TRUE	0	2.788	Cells_EBV-transformed_lymphocytes	14.78	Brain_Cerebellar_Hemisphere	0.2764
rs4869313	5	96223879	ERAP2	5	96211643	96255420	Artery_Aorta	1.75644e-79	4.43568e-75	-1.16845	KBM7	NA	TRUE	0	2.91	Cells_EBV-transformed_lymphocytes	14.78	Brain_Cerebellar_Hemisphere	0.2764
rs4869313	5	96223879	ERAP2	5	96211643	96255420	Artery_Coronary	3.70109e-39	3.53657e-35	-1.13691	KBM7	NA	TRUE	0	3.052	Cells_EBV-transformed_lymphocytes	14.78	Brain_Cerebellar_Hemisphere	0.2764
rs4869313	5	96223879	ERAP2	5	96211643	96255420	Artery_Tibial	4.59061e-109	3.24605e-104	-1.12883	KBM7	NA	TRUE	0	2.166	Cells_EBV-transformed_lymphocytes	14.78	Brain_Cerebellar_Hemisphere	0.2764
rs4869313	5	96223879	ERAP2	5	96211643	96255420	Brain_Amygdala	3.52836e-28	2.04502e-24	-1.04024	KBM7	NA	TRUE	0	0.8258	Cells_EBV-transformed_lymphocytes	14.78	Brain_Cerebellar_Hemisphere	0.2764
rs4869313	5	96223879	ERAP2	5	96211643	96255420	Brain_Anterior_cingulate_cortex_BA24	6.03378e-33	4.53885e-29	-1.17651	KBM7	NA	TRUE	0	0.5797	Cells_EBV-transformed_lymphocytes	14.78	Brain_Cerebellar_Hemisphere	0.2764
rs4869313	5	96223879	ERAP2	5	96211643	96255420	Brain_Caudate_basal_ganglia	1.4275e-45	1.62806e-41	-1.23877	KBM7	NA	TRUE	0	0.9317	Cells_EBV-transformed_lymphocytes	14.78	Brain_Cerebellar_Hemisphere	0.2764
rs4869313	5	96223879	ERAP2	5	96211643	96255420	Brain_Cerebellar_Hemisphere	1.6398e-26	8.05216e-23	-1.10133	KBM7	NA	TRUE	0	0.2764	Cells_EBV-transformed_lymphocytes	14.78	Brain_Cerebellar_Hemisphere	0.2764
rs4869313	5	96223879	ERAP2	5	96211643	96255420	Brain_Cerebellum	2.50468e-32	1.77107e-28	-1.12106	KBM7	NA	TRUE	0	0.3523	Cells_EBV-transformed_lymphocytes	14.78	Brain_Cerebellar_Hemisphere	0.2764
rs4869313	5	96223879	ERAP2	5	96211643	96255420	Brain_Cortex	6.61675e-35	5.4404e-31	-1.04914	KBM7	NA	TRUE	0	0.5064	Cells_EBV-transformed_lymphocytes	14.78	Brain_Cerebellar_Hemisphere	0.2764
rs4869313	5	96223879	ERAP2	5	96211643	96255420	Brain_Frontal_Cortex_BA9	6.87292e-23	2.58504e-19	-1.13198	KBM7	NA	TRUE	0	0.5736	Cells_EBV-transformed_lymphocytes	14.78	Brain_Cerebellar_Hemisphere	0.2764
rs4869313	5	96223879	ERAP2	5	96211643	96255420	Brain_Hippocampus	1.40172e-28	8.5445e-25	-1.17758	KBM7	NA	TRUE	0	0.6565	Cells_EBV-transformed_lymphocytes	14.78	Brain_Cerebellar_Hemisphere	0.2764
rs4869313	5	96223879	ERAP2	5	96211643	96255420	Brain_Hypothalamus	1.28326e-25	5.89222e-22	-1.11652	KBM7	NA	TRUE	0	0.8238	Cells_EBV-transformed_lymphocytes	14.78	Brain_Cerebellar_Hemisphere	0.2764
rs4869313	5	96223879	ERAP2	5	96211643	96255420	Brain_Nucleus_accumbens_basal_ganglia	5.17523e-31	3.51869e-27	-1.22396	KBM7	NA	TRUE	0	0.704	Cells_EBV-transformed_lymphocytes	14.78	Brain_Cerebellar_Hemisphere	0.2764
rs4869313	5	96223879	ERAP2	5	96211643	96255420	Brain_Putamen_basal_ganglia	8.81393e-28	4.86905e-24	-1.25547	KBM7	NA	TRUE	0	0.8093	Cells_EBV-transformed_lymphocytes	14.78	Brain_Cerebellar_Hemisphere	0.2764
rs4869313	5	96223879	ERAP2	5	96211643	96255420	Brain_Spinal_cord_cervical_c-1	9.69123e-22	3.42636e-18	-1.21515	KBM7	NA	TRUE	0	1.034	Cells_EBV-transformed_lymphocytes	14.78	Brain_Cerebellar_Hemisphere	0.2764
rs4869313	5	96223879	ERAP2	5	96211643	96255420	Brain_Substantia_nigra	3.19976e-20	1.01918e-16	-1.21582	KBM7	NA	TRUE	0	0.9379	Cells_EBV-transformed_lymphocytes	14.78	Brain_Cerebellar_Hemisphere	0.2764
rs4869313	5	96223879	ERAP2	5	96211643	96255420	Breast_Mammary_Tissue	1.86464e-63	2.99659e-59	-1.03175	KBM7	NA	TRUE	0	3.856	Cells_EBV-transformed_lymphocytes	14.78	Brain_Cerebellar_Hemisphere	0.2764
rs4869313	5	96223879	ERAP2	5	96211643	96255420	Cells_EBV-transformed_lymphocytes	3.16617e-49	4.14595e-45	-1.17197	KBM7	NA	TRUE	0	14.78	Cells_EBV-transformed_lymphocytes	14.78	Brain_Cerebellar_Hemisphere	0.2764
rs4869313	5	96223879	ERAP2	5	96211643	96255420	Cells_Transformed_fibroblasts	3.5478e-87	1.14031e-82	-1.10609	KBM7	NA	TRUE	0	5.473	Cells_EBV-transformed_lymphocytes	14.78	Brain_Cerebellar_Hemisphere	0.2764
rs4869313	5	96223879	ERAP2	5	96211643	96255420	Colon_Sigmoid	5.60049e-51	7.61565e-47	-0.996654	KBM7	NA	TRUE	0	2.253	Cells_EBV-transformed_lymphocytes	14.78	Brain_Cerebellar_Hemisphere	0.2764
rs4869313	5	96223879	ERAP2	5	96211643	96255420	Esophagus_Gastroesophageal_Junction	1.43173e-53	2.02477e-49	-1.01899	KBM7	NA	TRUE	0	2.021	Cells_EBV-transformed_lymphocytes	14.78	Brain_Cerebellar_Hemisphere	0.2764
rs4869313	5	96223879	ERAP2	5	96211643	96255420	Esophagus_Mucosa	2.21093e-93	8.68534e-89	-1.10717	KBM7	NA	TRUE	0	2.903	Cells_EBV-transformed_lymphocytes	14.78	Brain_Cerebellar_Hemisphere	0.2764
rs4869313	5	96223879	ERAP2	5	96211643	96255420	Esophagus_Muscularis	5.1198e-91	1.81012e-86	-1.03966	KBM7	NA	TRUE	0	2.054	Cells_EBV-transformed_lymphocytes	14.78	Brain_Cerebellar_Hemisphere	0.2764
rs4869313	5	96223879	ERAP2	5	96211643	96255420	Heart_Atrial_Appendage	1.65487e-71	3.25047e-67	-1.11413	KBM7	NA	TRUE	0	1.443	Cells_EBV-transformed_lymphocytes	14.78	Brain_Cerebellar_Hemisphere	0.2764
rs4869313	5	96223879	ERAP2	5	96211643	96255420	Heart_Left_Ventricle	1.38216e-75	3.05417e-71	-1.03515	KBM7	NA	TRUE	0	1.169	Cells_EBV-transformed_lymphocytes	14.78	Brain_Cerebellar_Hemisphere	0.2764
rs4869313	5	96223879	ERAP2	5	96211643	96255420	Liver	1.02835e-47	1.25371e-43	-1.16056	KBM7	NA	TRUE	0	2.018	Cells_EBV-transformed_lymphocytes	14.78	Brain_Cerebellar_Hemisphere	0.2764
rs4869313	5	96223879	ERAP2	5	96211643	96255420	Lung	9.84822e-116	1.16062e-110	-1.17796	KBM7	NA	TRUE	0	6.382	Cells_EBV-transformed_lymphocytes	14.78	Brain_Cerebellar_Hemisphere	0.2764
rs4869313	5	96223879	ERAP2	5	96211643	96255420	Minor_Salivary_Gland	2.19211e-26	1.04733e-22	-1.31721	KBM7	NA	TRUE	0	2.524	Cells_EBV-transformed_lymphocytes	14.78	Brain_Cerebellar_Hemisphere	0.2764
rs4869313	5	96223879	ERAP2	5	96211643	96255420	Muscle_Skeletal	5.01454e-128	1.77291e-122	-1.05202	KBM7	NA	TRUE	0	0.6755	Cells_EBV-transformed_lymphocytes	14.78	Brain_Cerebellar_Hemisphere	0.2764
rs4869313	5	96223879	ERAP2	5	96211643	96255420	Nerve_Tibial	1.39904e-100	7.0662e-96	-1.03749	KBM7	NA	TRUE	0	3.599	Cells_EBV-transformed_lymphocytes	14.78	Brain_Cerebellar_Hemisphere	0.2764
rs4869313	5	96223879	ERAP2	5	96211643	96255420	Ovary	3.74384e-36	3.2284e-32	-1.09714	KBM7	NA	TRUE	0	5.874	Cells_EBV-transformed_lymphocytes	14.78	Brain_Cerebellar_Hemisphere	0.2764
rs4869313	5	96223879	ERAP2	5	96211643	96255420	Pancreas	1.93984e-70	3.60967e-66	-1.11799	KBM7	NA	TRUE	0	0.8416	Cells_EBV-transformed_lymphocytes	14.78	Brain_Cerebellar_Hemisphere	0.2764
rs4869313	5	96223879	ERAP2	5	96211643	96255420	Pituitary	8.44907e-33	6.22332e-29	-1.00086	KBM7	NA	TRUE	0	2.448	Cells_EBV-transformed_lymphocytes	14.78	Brain_Cerebellar_Hemisphere	0.2764
rs4869313	5	96223879	ERAP2	5	96211643	96255420	Prostate	5.07764e-30	3.3872e-26	-1.01253	KBM7	NA	TRUE	0	3.94	Cells_EBV-transformed_lymphocytes	14.78	Brain_Cerebellar_Hemisphere	0.2764
rs4869313	5	96223879	ERAP2	5	96211643	96255420	Skin_Not_Sun_Exposed_Suprapubic	1.45842e-76	3.43752e-72	-0.985126	KBM7	NA	TRUE	0	2.268	Cells_EBV-transformed_lymphocytes	14.78	Brain_Cerebellar_Hemisphere	0.2764
rs4869313	5	96223879	ERAP2	5	96211643	96255420	Skin_Sun_Exposed_Lower_leg	6.37168e-108	3.75454e-103	-1.0178	KBM7	NA	TRUE	0	2.074	Cells_EBV-transformed_lymphocytes	14.78	Brain_Cerebellar_Hemisphere	0.2764
rs4869313	5	96223879	ERAP2	5	96211643	96255420	Small_Intestine_Terminal_Ileum	1.55946e-34	1.25307e-30	-0.984464	KBM7	NA	TRUE	0	8.912	Cells_EBV-transformed_lymphocytes	14.78	Brain_Cerebellar_Hemisphere	0.2764
rs4869313	5	96223879	ERAP2	5	96211643	96255420	Spleen	7.24245e-43	7.53115e-39	-1.09076	KBM7	NA	TRUE	0	12.37	Cells_EBV-transformed_lymphocytes	14.78	Brain_Cerebellar_Hemisphere	0.2764
rs4869313	5	96223879	ERAP2	5	96211643	96255420	Stomach	2.43581e-64	4.1009e-60	-1.02692	KBM7	NA	TRUE	0	2.248	Cells_EBV-transformed_lymphocytes	14.78	Brain_Cerebellar_Hemisphere	0.2764
rs4869313	5	96223879	ERAP2	5	96211643	96255420	Testis	2.61031e-47	3.07627e-43	-0.973934	KBM7	NA	TRUE	0	0.4439	Cells_EBV-transformed_lymphocytes	14.78	Brain_Cerebellar_Hemisphere	0.2764
rs4869313	5	96223879	ERAP2	5	96211643	96255420	Thyroid	9.82587e-110	8.68491e-105	-1.02211	KBM7	NA	TRUE	0	3.849	Cells_EBV-transformed_lymphocytes	14.78	Brain_Cerebellar_Hemisphere	0.2764
rs4869313	5	96223879	ERAP2	5	96211643	96255420	Uterus	2.68484e-28	1.60887e-24	-1.08222	KBM7	NA	TRUE	0	3.639	Cells_EBV-transformed_lymphocytes	14.78	Brain_Cerebellar_Hemisphere	0.2764
rs4869313	5	96223879	ERAP2	5	96211643	96255420	Vagina	2.21947e-25	9.80874e-22	-0.978861	KBM7	NA	TRUE	0	3.826	Cells_EBV-transformed_lymphocytes	14.78	Brain_Cerebellar_Hemisphere	0.2764
rs4869313	5	96223879	ERAP2	5	96211643	96255420	Whole_Blood	6.89781e-86	2.03228e-81	-0.932549	KBM7	NA	TRUE	0	2.714	Cells_EBV-transformed_lymphocytes	14.78	Brain_Cerebellar_Hemisphere	0.2764
rs4869313	5	96223879	LNPEP	5	96271098	96373219	Adipose_Subcutaneous	8.2387e-06	0.00322214	-0.105293	NHEK	NA	TRUE	47219	3.55	Cells_EBV-transformed_lymphocytes	13.47	Liver	0.685
rs4869313	5	96223879	LNPEP	5	96271098	96373219	Artery_Tibial	2.29011e-09	1.98937e-06	-0.132939	NHEK	NA	TRUE	47219	4.088	Cells_EBV-transformed_lymphocytes	13.47	Liver	0.685
rs4869313	5	96223879	LNPEP	5	96271098	96373219	Cells_Transformed_fibroblasts	0.000108211	0.0292494	-0.0948485	NHEK	NA	TRUE	47219	2.955	Cells_EBV-transformed_lymphocytes	13.47	Liver	0.685
rs4869313	5	96223879	LNPEP	5	96271098	96373219	Esophagus_Gastroesophageal_Junction	2.21557e-06	0.00101204	-0.126426	NHEK	NA	TRUE	47219	2.815	Cells_EBV-transformed_lymphocytes	13.47	Liver	0.685
rs4869313	5	96223879	LNPEP	5	96271098	96373219	Esophagus_Muscularis	3.65013e-11	4.16295e-08	-0.147145	NHEK	NA	TRUE	47219	2.957	Cells_EBV-transformed_lymphocytes	13.47	Liver	0.685
rs4869313	5	96223879	LNPEP	5	96271098	96373219	Testis	4.22927e-13	6.20444e-10	-0.244302	NHEK	NA	TRUE	47219	1.378	Cells_EBV-transformed_lymphocytes	13.47	Liver	0.685
rs4869313	5	96223879	LNPEP	5	96271098	96373219	Whole_Blood	4.37163e-07	0.000237055	-0.12253	NHEK	NA	TRUE	47219	1.187	Cells_EBV-transformed_lymphocytes	13.47	Liver	0.685
rs539514	13	76326281	LMO7	13	76194570	76434004	Artery_Aorta	0.000168271	0.0421282	-0.134253	KBM7	NA	TRUE	0	8.196	Esophagus_Mucosa	26.28	Whole_Blood	0.139
rs539514	13	76326281	LMO7	13	76194570	76434004	Pancreas	1.22379e-07	7.45992e-05	0.313618	KBM7	NA	TRUE	0	2.953	Esophagus_Mucosa	26.28	Whole_Blood	0.139
rs539514	13	76326281	LMO7	13	76194570	76434004	Skin_Not_Sun_Exposed_Suprapubic	0.00013553	0.035104	0.174002	KBM7	NA	TRUE	0	7.133	Esophagus_Mucosa	26.28	Whole_Blood	0.139
rs539514	13	76326281	LMO7	13	76194570	76434004	Skin_Sun_Exposed_Lower_leg	3.24154e-05	0.0106313	0.171614	KBM7	NA	TRUE	0	6.625	Esophagus_Mucosa	26.28	Whole_Blood	0.139
rs5753037	22	30581721	ASCC2	22	30184597	30234271	Testis	5.70864e-19	1.66802e-15	0.45642	KBM7	NA	TRUE	347450	24.73	Whole_Blood	28.67	Brain_Anterior_cingulate_cortex_BA24	4.417
rs5753037	22	30581721	ASCC2	22	30184597	30234271	Thyroid	2.11562e-07	0.000123227	-0.173702	KBM7	NA	TRUE	347450	20.23	Whole_Blood	28.67	Brain_Anterior_cingulate_cortex_BA24	4.417
rs5753037	22	30581721	MTMR3	22	30279144	30426855	Artery_Tibial	2.97926e-08	2.04133e-05	-0.175201	KBM7	NA	TRUE	154866	8.706	Whole_Blood	30.29	Liver	3.381
rs5753037	22	30581721	MTMR3	22	30279144	30426855	Brain_Cortex	5.59709e-05	0.016986	-0.250709	KBM7	NA	TRUE	154866	6.703	Whole_Blood	30.29	Liver	3.381
rs5753037	22	30581721	MTMR3	22	30279144	30426855	Muscle_Skeletal	1.48807e-08	1.08031e-05	-0.143717	KBM7	NA	TRUE	154866	7.756	Whole_Blood	30.29	Liver	3.381
rs5753037	22	30581721	MTMR3	22	30279144	30426855	Nerve_Tibial	4.9714e-07	0.000265887	-0.182009	KBM7	NA	TRUE	154866	13.36	Whole_Blood	30.29	Liver	3.381
rs5753037	22	30581721	MTMR3	22	30279144	30426855	Thyroid	2.03366e-05	0.007056	-0.133544	KBM7	NA	TRUE	154866	12.48	Whole_Blood	30.29	Liver	3.381
rs5753037	22	30581721	ZMAT5	22	30126945	30163000	Skin_Sun_Exposed_Lower_leg	1.11118e-06	0.000541875	0.174786	KBM7	NA	TRUE	418721	10.74	Adrenal_Gland	17.15	Pituitary	7.52
rs579459	9	136154167	ABO	9	136125788	136150617	Adipose_Subcutaneous	2.20625e-09	1.92125e-06	0.382147	KBM7	NA	TRUE	3550	0.8277	Small_Intestine_Terminal_Ileum	18.01	Cells_EBV-transformed_lymphocytes	0
rs579459	9	136154167	ABO	9	136125788	136150617	Adipose_Visceral_Omentum	2.61522e-07	0.000148892	0.35371	KBM7	NA	TRUE	3550	1.463	Small_Intestine_Terminal_Ileum	18.01	Cells_EBV-transformed_lymphocytes	0
rs579459	9	136154167	ABO	9	136125788	136150617	Adrenal_Gland	1.62803e-06	0.000765418	0.50926	KBM7	NA	TRUE	3550	8.405	Small_Intestine_Terminal_Ileum	18.01	Cells_EBV-transformed_lymphocytes	0
rs579459	9	136154167	ABO	9	136125788	136150617	Artery_Tibial	2.25701e-05	0.00772481	0.225635	KBM7	NA	TRUE	3550	0.1103	Small_Intestine_Terminal_Ileum	18.01	Cells_EBV-transformed_lymphocytes	0
rs579459	9	136154167	ABO	9	136125788	136150617	Esophagus_Mucosa	7.05193e-07	0.000363976	0.343645	KBM7	NA	TRUE	3550	8.4	Small_Intestine_Terminal_Ileum	18.01	Cells_EBV-transformed_lymphocytes	0
rs579459	9	136154167	ABO	9	136125788	136150617	Esophagus_Muscularis	7.7702e-05	0.0224994	0.290682	KBM7	NA	TRUE	3550	0.5303	Small_Intestine_Terminal_Ileum	18.01	Cells_EBV-transformed_lymphocytes	0
rs579459	9	136154167	ABO	9	136125788	136150617	Heart_Atrial_Appendage	7.04295e-06	0.0027853	0.34834	KBM7	NA	TRUE	3550	0.4696	Small_Intestine_Terminal_Ileum	18.01	Cells_EBV-transformed_lymphocytes	0
rs579459	9	136154167	ABO	9	136125788	136150617	Heart_Left_Ventricle	1.52181e-06	0.00072027	0.327558	KBM7	NA	TRUE	3550	0.5844	Small_Intestine_Terminal_Ileum	18.01	Cells_EBV-transformed_lymphocytes	0
rs579459	9	136154167	ABO	9	136125788	136150617	Muscle_Skeletal	5.71578e-06	0.00230425	0.331595	KBM7	NA	TRUE	3550	0.15	Small_Intestine_Terminal_Ileum	18.01	Cells_EBV-transformed_lymphocytes	0
rs579459	9	136154167	ABO	9	136125788	136150617	Whole_Blood	2.22793e-13	3.38065e-10	-0.610405	KBM7	NA	TRUE	3550	0.072	Small_Intestine_Terminal_Ileum	18.01	Cells_EBV-transformed_lymphocytes	0
rs602662	19	49206984	FUT2	19	49199228	49209207	Brain_Anterior_cingulate_cortex_BA24	1.79835e-06	0.000836594	0.461618	KBM7	NA	TRUE	0	0.331	Minor_Salivary_Gland	29.1	Muscle_Skeletal	0.02749
rs602662	19	49206984	FUT2	19	49199228	49209207	Brain_Caudate_basal_ganglia	2.61158e-08	1.79637e-05	0.458756	KBM7	NA	TRUE	0	0.3964	Minor_Salivary_Gland	29.1	Muscle_Skeletal	0.02749
rs602662	19	49206984	FUT2	19	49199228	49209207	Brain_Nucleus_accumbens_basal_ganglia	2.65905e-05	0.00892796	0.408628	KBM7	NA	TRUE	0	0.352	Minor_Salivary_Gland	29.1	Muscle_Skeletal	0.02749
rs602662	19	49206984	FUT2	19	49199228	49209207	Brain_Putamen_basal_ganglia	1.60221e-07	9.5365e-05	0.592766	KBM7	NA	TRUE	0	0.3553	Minor_Salivary_Gland	29.1	Muscle_Skeletal	0.02749
rs602662	19	49206984	FUT2	19	49199228	49209207	Breast_Mammary_Tissue	8.31846e-05	0.0237562	-0.181809	KBM7	NA	TRUE	0	0.3424	Minor_Salivary_Gland	29.1	Muscle_Skeletal	0.02749
rs602662	19	49206984	FUT2	19	49199228	49209207	Cells_Transformed_fibroblasts	6.27873e-06	0.00251116	-0.25359	KBM7	NA	TRUE	0	0.166	Minor_Salivary_Gland	29.1	Muscle_Skeletal	0.02749
rs602662	19	49206984	FUT2	19	49199228	49209207	Esophagus_Mucosa	1.37936e-85	3.75135e-81	-0.689744	KBM7	NA	TRUE	0	11.27	Minor_Salivary_Gland	29.1	Muscle_Skeletal	0.02749
rs602662	19	49206984	FUT2	19	49199228	49209207	Lung	1.34479e-05	0.00492151	-0.212213	KBM7	NA	TRUE	0	0.2477	Minor_Salivary_Gland	29.1	Muscle_Skeletal	0.02749
rs602662	19	49206984	FUT2	19	49199228	49209207	Minor_Salivary_Gland	8.41069e-17	1.99572e-13	-0.63889	KBM7	NA	TRUE	0	29.1	Minor_Salivary_Gland	29.1	Muscle_Skeletal	0.02749
rs602662	19	49206984	FUT2	19	49199228	49209207	Pancreas	2.58485e-34	2.03085e-30	-0.893222	KBM7	NA	TRUE	0	1.573	Minor_Salivary_Gland	29.1	Muscle_Skeletal	0.02749
rs602662	19	49206984	FUT2	19	49199228	49209207	Pituitary	2.42584e-10	2.42277e-07	-0.404557	KBM7	NA	TRUE	0	1.17	Minor_Salivary_Gland	29.1	Muscle_Skeletal	0.02749
rs602662	19	49206984	FUT2	19	49199228	49209207	Skin_Not_Sun_Exposed_Suprapubic	9.51699e-28	5.17656e-24	-0.557521	KBM7	NA	TRUE	0	1.767	Minor_Salivary_Gland	29.1	Muscle_Skeletal	0.02749
rs602662	19	49206984	FUT2	19	49199228	49209207	Skin_Sun_Exposed_Lower_leg	4.55236e-22	1.64235e-18	-0.376436	KBM7	NA	TRUE	0	2.043	Minor_Salivary_Gland	29.1	Muscle_Skeletal	0.02749
rs602662	19	49206984	FUT2	19	49199228	49209207	Small_Intestine_Terminal_Ileum	3.07632e-10	3.02965e-07	-0.341502	KBM7	NA	TRUE	0	7.694	Minor_Salivary_Gland	29.1	Muscle_Skeletal	0.02749
rs602662	19	49206984	FUT2	19	49199228	49209207	Stomach	9.92085e-19	2.78377e-15	-0.271546	KBM7	NA	TRUE	0	5.38	Minor_Salivary_Gland	29.1	Muscle_Skeletal	0.02749
rs602662	19	49206984	IZUMO1	19	49244109	49250166	Adrenal_Gland	9.94538e-05	0.0273636	0.381341	KBM7	NA	TRUE	37125	0.3104	Testis	22.93	Cells_EBV-transformed_lymphocytes	0
rs602662	19	49206984	IZUMO1	19	49244109	49250166	Lung	1.88511e-05	0.00659234	0.214161	KBM7	NA	TRUE	37125	1.235	Testis	22.93	Cells_EBV-transformed_lymphocytes	0
rs602662	19	49206984	IZUMO1	19	49244109	49250166	Testis	2.73563e-05	0.00915901	0.136346	KBM7	NA	TRUE	37125	22.93	Testis	22.93	Cells_EBV-transformed_lymphocytes	0
rs602662	19	49206984	MAMSTR	19	49215999	49222978	Adrenal_Gland	5.86566e-06	0.0023593	0.229042	KBM7	NA	TRUE	9015	14.63	Adrenal_Gland	14.63	Whole_Blood	0.06415
rs602662	19	49206984	MAMSTR	19	49215999	49222978	Brain_Caudate_basal_ganglia	0.000153256	0.0390376	0.295097	KBM7	NA	TRUE	9015	1.172	Adrenal_Gland	14.63	Whole_Blood	0.06415
rs602662	19	49206984	MAMSTR	19	49215999	49222978	Brain_Frontal_Cortex_BA9	4.06684e-05	0.0128955	0.364437	KBM7	NA	TRUE	9015	1.624	Adrenal_Gland	14.63	Whole_Blood	0.06415
rs602662	19	49206984	MAMSTR	19	49215999	49222978	Brain_Putamen_basal_ganglia	2.1566e-05	0.00740265	0.476664	KBM7	NA	TRUE	9015	1.081	Adrenal_Gland	14.63	Whole_Blood	0.06415
rs602662	19	49206984	MAMSTR	19	49215999	49222978	Cells_Transformed_fibroblasts	0.000157222	0.0397612	0.139836	KBM7	NA	TRUE	9015	0.955	Adrenal_Gland	14.63	Whole_Blood	0.06415
rs602662	19	49206984	MAMSTR	19	49215999	49222978	Colon_Sigmoid	0.000106837	0.0290557	0.184733	KBM7	NA	TRUE	9015	1.221	Adrenal_Gland	14.63	Whole_Blood	0.06415
rs602662	19	49206984	MAMSTR	19	49215999	49222978	Esophagus_Gastroesophageal_Junction	1.05738e-08	8.07426e-06	0.287884	KBM7	NA	TRUE	9015	1.414	Adrenal_Gland	14.63	Whole_Blood	0.06415
rs602662	19	49206984	MAMSTR	19	49215999	49222978	Esophagus_Muscularis	4.39835e-08	2.92302e-05	0.204692	KBM7	NA	TRUE	9015	0.9821	Adrenal_Gland	14.63	Whole_Blood	0.06415
rs602662	19	49206984	MAMSTR	19	49215999	49222978	Heart_Atrial_Appendage	3.65504e-10	3.54041e-07	0.337262	KBM7	NA	TRUE	9015	1.307	Adrenal_Gland	14.63	Whole_Blood	0.06415
rs602662	19	49206984	MAMSTR	19	49215999	49222978	Heart_Left_Ventricle	8.54221e-12	1.07097e-08	0.413286	KBM7	NA	TRUE	9015	0.8997	Adrenal_Gland	14.63	Whole_Blood	0.06415
rs602662	19	49206984	MAMSTR	19	49215999	49222978	Muscle_Skeletal	4.5782e-06	0.00191328	0.0925978	KBM7	NA	TRUE	9015	10.69	Adrenal_Gland	14.63	Whole_Blood	0.06415
rs602662	19	49206984	RASIP1	19	49223844	49243978	Cells_Transformed_fibroblasts	1.1362e-22	4.18446e-19	0.661304	KBM7	NA	TRUE	16860	0.4162	Lung	22.69	Cells_EBV-transformed_lymphocytes	0.03739
rs602662	19	49206984	RASIP1	19	49223844	49243978	Colon_Sigmoid	1.58829e-06	0.0007494	0.401323	KBM7	NA	TRUE	16860	5.106	Lung	22.69	Cells_EBV-transformed_lymphocytes	0.03739
rs602662	19	49206984	RASIP1	19	49223844	49243978	Esophagus_Mucosa	8.05982e-15	1.47646e-11	0.401454	KBM7	NA	TRUE	16860	4.445	Lung	22.69	Cells_EBV-transformed_lymphocytes	0.03739
rs602662	19	49206984	RASIP1	19	49223844	49243978	Ovary	1.95673e-06	0.000903143	0.430082	KBM7	NA	TRUE	16860	5.152	Lung	22.69	Cells_EBV-transformed_lymphocytes	0.03739
rs602662	19	49206984	RASIP1	19	49223844	49243978	Skin_Not_Sun_Exposed_Suprapubic	1.15087e-10	1.211e-07	0.280359	KBM7	NA	TRUE	16860	6.326	Lung	22.69	Cells_EBV-transformed_lymphocytes	0.03739
rs602662	19	49206984	RASIP1	19	49223844	49243978	Skin_Sun_Exposed_Lower_leg	5.70857e-13	8.34e-10	0.308106	KBM7	NA	TRUE	16860	6.069	Lung	22.69	Cells_EBV-transformed_lymphocytes	0.03739
rs602662	19	49206984	RASIP1	19	49223844	49243978	Testis	5.97452e-15	1.14179e-11	0.415537	KBM7	NA	TRUE	16860	9.093	Lung	22.69	Cells_EBV-transformed_lymphocytes	0.03739
rs614226	12	120974509	COQ5	12	120941077	120972237	Heart_Left_Ventricle	4.3727e-06	0.00184204	-0.343146	KBM7	NA	TRUE	2272	12.97	Cells_EBV-transformed_lymphocytes	24.59	Whole_Blood	3.879
rs614226	12	120974509	COQ5	12	120941077	120972237	Muscle_Skeletal	2.27236e-13	3.43333e-10	-0.306665	KBM7	NA	TRUE	2272	16.56	Cells_EBV-transformed_lymphocytes	24.59	Whole_Blood	3.879
rs614226	12	120974509	DYNLL1	12	120907653	120936296	Brain_Cerebellum	3.10617e-05	0.0102444	-0.26254	KBM7	NA	TRUE	38213	39.18	Brain_Anterior_cingulate_cortex_BA24	106.9	Muscle_Skeletal	4.638
rs614226	12	120974509	DYNLL1	12	120907653	120936296	Brain_Putamen_basal_ganglia	3.34075e-05	0.010886	-0.323571	KBM7	NA	TRUE	38213	60.37	Brain_Anterior_cingulate_cortex_BA24	106.9	Muscle_Skeletal	4.638
rs614226	12	120974509	DYNLL1	12	120907653	120936296	Testis	4.88698e-06	0.00201611	-0.281452	KBM7	NA	TRUE	38213	77.18	Brain_Anterior_cingulate_cortex_BA24	106.9	Muscle_Skeletal	4.638
rs614226	12	120974509	DYNLL1-AS1	12	120928131	120933743	Artery_Tibial	9.46196e-06	0.00359736	0.233068	NHEK	NA	TRUE	40766	1.651	Testis	48.87	Whole_Blood	0.2297
rs614226	12	120974509	DYNLL1-AS1	12	120928131	120933743	Testis	3.63322e-07	0.000199772	0.300738	NHEK	NA	TRUE	40766	48.87	Testis	48.87	Whole_Blood	0.2297
rs614226	12	120974509	MSI1	12	120779133	120806983	Skin_Sun_Exposed_Lower_leg	4.6862e-05	0.0145975	0.241052	KBM7	NA	TRUE	167526	0.2613	Testis	14.98	Cells_EBV-transformed_lymphocytes	0
rs614226	12	120974509	POP5	12	121016567	121019201	Artery_Aorta	6.34328e-06	0.00253411	0.201819	HUVEC	NA	TRUE	42058	10.89	Adrenal_Gland	21.82	Whole_Blood	3.484
rs614226	12	120974509	POP5	12	121016567	121019201	Esophagus_Mucosa	0.000175125	0.0434498	0.14713	HUVEC	NA	TRUE	42058	9.886	Adrenal_Gland	21.82	Whole_Blood	3.484
rs614226	12	120974509	POP5	12	121016567	121019201	Pancreas	3.09363e-05	0.0102125	0.272608	HUVEC	NA	TRUE	42058	7.627	Adrenal_Gland	21.82	Whole_Blood	3.484
rs614226	12	120974509	POP5	12	121016567	121019201	Testis	0.000171515	0.0428247	0.240546	HUVEC	NA	TRUE	42058	7.758	Adrenal_Gland	21.82	Whole_Blood	3.484
rs614226	12	120974509	POP5	12	121016567	121019201	Thyroid	8.29661e-06	0.00323406	0.173212	HUVEC	NA	TRUE	42058	17.67	Adrenal_Gland	21.82	Whole_Blood	3.484
rs614226	12	120974509	RNF10	12	120971283	121015397	Artery_Tibial	2.9856e-06	0.00131581	-0.127812	KBM7	NA	TRUE	0	36.96	Whole_Blood	132.2	Liver	16.77
rs614226	12	120974509	RNF10	12	120971283	121015397	Testis	4.43125e-06	0.00185973	-0.284173	KBM7	NA	TRUE	0	57.16	Whole_Blood	132.2	Liver	16.77
rs6547853	2	28646800	RP11-373D23.3	2	28648812	28649586	Artery_Tibial	9.15446e-05	0.0256465	0.117332	IMR90	NA	TRUE	2012	10.32	Artery_Tibial	10.32	Cells_EBV-transformed_lymphocytes	0
rs6547853	2	28646800	RP11-373D23.3	2	28648812	28649586	Cells_Transformed_fibroblasts	0.000122716	0.0322818	0.202374	IMR90	NA	TRUE	2012	0.2974	Artery_Tibial	10.32	Cells_EBV-transformed_lymphocytes	0
rs6547853	2	28646800	RP11-373D23.3	2	28648812	28649586	Esophagus_Mucosa	7.39313e-13	1.05824e-09	0.304836	IMR90	NA	TRUE	2012	2.74	Artery_Tibial	10.32	Cells_EBV-transformed_lymphocytes	0
rs6547853	2	28646800	RP11-373D23.3	2	28648812	28649586	Muscle_Skeletal	1.19497e-05	0.00445188	0.119933	IMR90	NA	TRUE	2012	5.499	Artery_Tibial	10.32	Cells_EBV-transformed_lymphocytes	0
rs6547853	2	28646800	RP11-373D23.3	2	28648812	28649586	Nerve_Tibial	7.99577e-05	0.0230394	0.177899	IMR90	NA	TRUE	2012	2.377	Artery_Tibial	10.32	Cells_EBV-transformed_lymphocytes	0
rs6547853	2	28646800	RP11-373D23.3	2	28648812	28649586	Skin_Not_Sun_Exposed_Suprapubic	7.51117e-07	0.000383757	0.272176	IMR90	NA	TRUE	2012	1.769	Artery_Tibial	10.32	Cells_EBV-transformed_lymphocytes	0
rs6547853	2	28646800	RP11-373D23.3	2	28648812	28649586	Thyroid	4.01268e-05	0.0127648	0.241303	IMR90	NA	TRUE	2012	0.6263	Artery_Tibial	10.32	Cells_EBV-transformed_lymphocytes	0
rs657152	9	136139264	ABO	9	136125788	136150617	Adipose_Subcutaneous	1.32075e-16	3.0126e-13	0.445809	KBM7	NA	TRUE	0	0.8277	Small_Intestine_Terminal_Ileum	18.01	Cells_EBV-transformed_lymphocytes	0
rs657152	9	136139264	ABO	9	136125788	136150617	Adipose_Visceral_Omentum	1.96115e-32	1.41504e-28	0.669339	KBM7	NA	TRUE	0	1.463	Small_Intestine_Terminal_Ileum	18.01	Cells_EBV-transformed_lymphocytes	0
rs657152	9	136139264	ABO	9	136125788	136150617	Adrenal_Gland	1.98619e-26	9.61949e-23	0.811632	KBM7	NA	TRUE	0	8.405	Small_Intestine_Terminal_Ileum	18.01	Cells_EBV-transformed_lymphocytes	0
rs657152	9	136139264	ABO	9	136125788	136150617	Artery_Aorta	1.22517e-06	0.000593374	0.335631	KBM7	NA	TRUE	0	0.1785	Small_Intestine_Terminal_Ileum	18.01	Cells_EBV-transformed_lymphocytes	0
rs657152	9	136139264	ABO	9	136125788	136150617	Artery_Coronary	2.27285e-07	0.000131167	0.367928	KBM7	NA	TRUE	0	0.3044	Small_Intestine_Terminal_Ileum	18.01	Cells_EBV-transformed_lymphocytes	0
rs657152	9	136139264	ABO	9	136125788	136150617	Artery_Tibial	4.97145e-10	4.73766e-07	0.29174	KBM7	NA	TRUE	0	0.1103	Small_Intestine_Terminal_Ileum	18.01	Cells_EBV-transformed_lymphocytes	0
rs657152	9	136139264	ABO	9	136125788	136150617	Brain_Frontal_Cortex_BA9	0.000180889	0.0446293	0.462975	KBM7	NA	TRUE	0	0.2066	Small_Intestine_Terminal_Ileum	18.01	Cells_EBV-transformed_lymphocytes	0
rs657152	9	136139264	ABO	9	136125788	136150617	Breast_Mammary_Tissue	1.49283e-09	1.34641e-06	0.487958	KBM7	NA	TRUE	0	1.372	Small_Intestine_Terminal_Ileum	18.01	Cells_EBV-transformed_lymphocytes	0
rs657152	9	136139264	ABO	9	136125788	136150617	Colon_Sigmoid	1.78081e-09	1.5701e-06	0.367584	KBM7	NA	TRUE	0	0.4325	Small_Intestine_Terminal_Ileum	18.01	Cells_EBV-transformed_lymphocytes	0
rs657152	9	136139264	ABO	9	136125788	136150617	Esophagus_Gastroesophageal_Junction	2.80938e-12	3.7201e-09	0.581739	KBM7	NA	TRUE	0	0.504	Small_Intestine_Terminal_Ileum	18.01	Cells_EBV-transformed_lymphocytes	0
rs657152	9	136139264	ABO	9	136125788	136150617	Esophagus_Mucosa	8.34604e-43	8.43076e-39	0.748985	KBM7	NA	TRUE	0	8.4	Small_Intestine_Terminal_Ileum	18.01	Cells_EBV-transformed_lymphocytes	0
rs657152	9	136139264	ABO	9	136125788	136150617	Esophagus_Muscularis	2.15874e-15	4.33652e-12	0.506698	KBM7	NA	TRUE	0	0.5303	Small_Intestine_Terminal_Ileum	18.01	Cells_EBV-transformed_lymphocytes	0
rs657152	9	136139264	ABO	9	136125788	136150617	Heart_Atrial_Appendage	1.38371e-21	4.84373e-18	0.612534	KBM7	NA	TRUE	0	0.4696	Small_Intestine_Terminal_Ileum	18.01	Cells_EBV-transformed_lymphocytes	0
rs657152	9	136139264	ABO	9	136125788	136150617	Heart_Left_Ventricle	6.8423e-20	2.12203e-16	0.507245	KBM7	NA	TRUE	0	0.5844	Small_Intestine_Terminal_Ileum	18.01	Cells_EBV-transformed_lymphocytes	0
rs657152	9	136139264	ABO	9	136125788	136150617	Liver	2.05624e-05	0.00711617	0.524322	KBM7	NA	TRUE	0	0.03422	Small_Intestine_Terminal_Ileum	18.01	Cells_EBV-transformed_lymphocytes	0
rs657152	9	136139264	ABO	9	136125788	136150617	Lung	3.88782e-25	1.69698e-21	0.442389	KBM7	NA	TRUE	0	2.128	Small_Intestine_Terminal_Ileum	18.01	Cells_EBV-transformed_lymphocytes	0
rs657152	9	136139264	ABO	9	136125788	136150617	Muscle_Skeletal	1.85457e-36	1.63923e-32	0.728161	KBM7	NA	TRUE	0	0.15	Small_Intestine_Terminal_Ileum	18.01	Cells_EBV-transformed_lymphocytes	0
rs657152	9	136139264	ABO	9	136125788	136150617	Nerve_Tibial	1.3282e-18	3.61222e-15	0.557126	KBM7	NA	TRUE	0	2.654	Small_Intestine_Terminal_Ileum	18.01	Cells_EBV-transformed_lymphocytes	0
rs657152	9	136139264	ABO	9	136125788	136150617	Ovary	3.04737e-10	3.00952e-07	0.543508	KBM7	NA	TRUE	0	13.51	Small_Intestine_Terminal_Ileum	18.01	Cells_EBV-transformed_lymphocytes	0
rs657152	9	136139264	ABO	9	136125788	136150617	Pancreas	1.59826e-20	5.23213e-17	0.816316	KBM7	NA	TRUE	0	2.281	Small_Intestine_Terminal_Ileum	18.01	Cells_EBV-transformed_lymphocytes	0
rs657152	9	136139264	ABO	9	136125788	136150617	Pituitary	6.74188e-12	8.57415e-09	0.456013	KBM7	NA	TRUE	0	0.2932	Small_Intestine_Terminal_Ileum	18.01	Cells_EBV-transformed_lymphocytes	0
rs657152	9	136139264	ABO	9	136125788	136150617	Skin_Not_Sun_Exposed_Suprapubic	1.55268e-15	3.13688e-12	0.557935	KBM7	NA	TRUE	0	1.101	Small_Intestine_Terminal_Ileum	18.01	Cells_EBV-transformed_lymphocytes	0
rs657152	9	136139264	ABO	9	136125788	136150617	Skin_Sun_Exposed_Lower_leg	7.88626e-16	1.64983e-12	0.504708	KBM7	NA	TRUE	0	0.9978	Small_Intestine_Terminal_Ileum	18.01	Cells_EBV-transformed_lymphocytes	0
rs657152	9	136139264	ABO	9	136125788	136150617	Small_Intestine_Terminal_Ileum	3.30926e-05	0.0107933	0.262014	KBM7	NA	TRUE	0	18.01	Small_Intestine_Terminal_Ileum	18.01	Cells_EBV-transformed_lymphocytes	0
rs657152	9	136139264	ABO	9	136125788	136150617	Spleen	0.000162343	0.0409102	0.36552	KBM7	NA	TRUE	0	0.5339	Small_Intestine_Terminal_Ileum	18.01	Cells_EBV-transformed_lymphocytes	0
rs657152	9	136139264	ABO	9	136125788	136150617	Stomach	8.92127e-05	0.0250527	0.24228	KBM7	NA	TRUE	0	1.473	Small_Intestine_Terminal_Ileum	18.01	Cells_EBV-transformed_lymphocytes	0
rs657152	9	136139264	ABO	9	136125788	136150617	Testis	1.26447e-13	2.01377e-10	0.428355	KBM7	NA	TRUE	0	4.356	Small_Intestine_Terminal_Ileum	18.01	Cells_EBV-transformed_lymphocytes	0
rs657152	9	136139264	ABO	9	136125788	136150617	Thyroid	4.44964e-16	9.53444e-13	0.466755	KBM7	NA	TRUE	0	11.92	Small_Intestine_Terminal_Ileum	18.01	Cells_EBV-transformed_lymphocytes	0
rs657152	9	136139264	ABO	9	136125788	136150617	Uterus	4.44188e-06	0.00186071	0.62359	KBM7	NA	TRUE	0	1.108	Small_Intestine_Terminal_Ileum	18.01	Cells_EBV-transformed_lymphocytes	0
rs657152	9	136139264	ABO	9	136125788	136150617	Vagina	6.45725e-11	7.04624e-08	0.667565	KBM7	NA	TRUE	0	3.87	Small_Intestine_Terminal_Ileum	18.01	Cells_EBV-transformed_lymphocytes	0
rs657152	9	136139264	ABO	9	136125788	136150617	Whole_Blood	6.22146e-05	0.0185842	-0.29744	KBM7	NA	TRUE	0	0.072	Small_Intestine_Terminal_Ileum	18.01	Cells_EBV-transformed_lymphocytes	0
rs6679677	1	114303807	AP4B1-AS1	1	114399257	114443859	Lung	0.00016647	0.0417716	-0.275491	HUVEC	NA	TRUE	95450	1.009	Brain_Cerebellum	2.769	Muscle_Skeletal	0.2051
rs689	11	2182223	IGF2-AS	11	2161731	2169894	Brain_Putamen_basal_ganglia	2.13888e-05	0.00734897	-0.522995	KBM7	NA	TRUE	12329	0.05962	Nerve_Tibial	0.8458	Cells_EBV-transformed_lymphocytes	0
rs689	11	2182223	IGF2-AS	11	2161731	2169894	Liver	5.54096e-06	0.00223888	-0.473757	KBM7	NA	TRUE	12329	0.5799	Nerve_Tibial	0.8458	Cells_EBV-transformed_lymphocytes	0
rs6931865	6	144079853	PHACTR2	6	143857982	144152322	Cells_Transformed_fibroblasts	8.69866e-05	0.0245446	0.148892	KBM7	NA	TRUE	0	2.796	Adrenal_Gland	10.01	Cells_EBV-transformed_lymphocytes	0.2442
rs6931865	6	144079853	PHACTR2	6	143857982	144152322	Pancreas	1.5898e-07	9.49455e-05	0.391746	KBM7	NA	TRUE	0	0.7685	Adrenal_Gland	10.01	Cells_EBV-transformed_lymphocytes	0.2442
rs6931865	6	144079853	PHACTR2	6	143857982	144152322	Thyroid	0.000109812	0.0295386	0.135945	KBM7	NA	TRUE	0	5.291	Adrenal_Gland	10.01	Cells_EBV-transformed_lymphocytes	0.2442
rs7100025	10	37592537	ATP8A2P1	10	37537046	37604729	Testis	8.51267e-05	0.0241354	-0.210265	KBM7	NA	TRUE	0	2.788	Breast_Mammary_Tissue	9.653	Adrenal_Gland	0
rs7100025	10	37592537	ZNF25	10	38238500	38265561	Adipose_Subcutaneous	9.46265e-06	0.00359736	-0.148248	NHEK	NA	TRUE	645963	7.88	Brain_Cerebellar_Hemisphere	22.51	Whole_Blood	0.6899
rs7171171	15	38907040	RASGRP1	15	38780304	38857776	Cells_EBV-transformed_lymphocytes	1.87225e-05	0.00656036	0.475427	KBM7	NA	TRUE	49264	8.929	Brain_Cerebellar_Hemisphere	16.94	Muscle_Skeletal	0.0575
rs7171171	15	38907040	RASGRP1	15	38780304	38857776	Esophagus_Mucosa	6.82529e-58	1.04917e-53	0.618136	KBM7	NA	TRUE	49264	2.925	Brain_Cerebellar_Hemisphere	16.94	Muscle_Skeletal	0.0575
rs7171171	15	38907040	RASGRP1	15	38780304	38857776	Skin_Not_Sun_Exposed_Suprapubic	8.60527e-57	1.26767e-52	0.805157	KBM7	NA	TRUE	49264	3.62	Brain_Cerebellar_Hemisphere	16.94	Muscle_Skeletal	0.0575
rs7171171	15	38907040	RASGRP1	15	38780304	38857776	Skin_Sun_Exposed_Lower_leg	3.3351e-74	6.93608e-70	0.812335	KBM7	NA	TRUE	49264	3.948	Brain_Cerebellar_Hemisphere	16.94	Muscle_Skeletal	0.0575
rs7202877	16	75247244	BCAR1	16	75262928	75301951	Whole_Blood	6.61956e-05	0.019601	0.248382	KBM7	NA	TRUE	15684	0.04354	Brain_Cerebellum	23.38	Whole_Blood	0.04354
rs7202877	16	75247244	CFDP1	16	75327596	75467383	Adipose_Subcutaneous	1.53876e-09	1.38431e-06	0.244259	NHEK	NA	TRUE	80352	14.48	Testis	34.1	Whole_Blood	3.919
rs7202877	16	75247244	CFDP1	16	75327596	75467383	Adipose_Visceral_Omentum	1.34774e-08	9.90637e-06	0.267726	NHEK	NA	TRUE	80352	16.04	Testis	34.1	Whole_Blood	3.919
rs7202877	16	75247244	CFDP1	16	75327596	75467383	Esophagus_Mucosa	9.86373e-05	0.0271601	0.18617	NHEK	NA	TRUE	80352	13.31	Testis	34.1	Whole_Blood	3.919
rs7202877	16	75247244	CFDP1	16	75327596	75467383	Skin_Sun_Exposed_Lower_leg	2.10373e-07	0.000122736	0.190362	NHEK	NA	TRUE	80352	13.84	Testis	34.1	Whole_Blood	3.919
rs7202877	16	75247244	CFDP1	16	75327596	75467383	Whole_Blood	3.42563e-06	0.0014752	0.218961	NHEK	NA	TRUE	80352	3.919	Testis	34.1	Whole_Blood	3.919
rs7202877	16	75247244	TMEM170A	16	75476952	75499395	Skin_Not_Sun_Exposed_Suprapubic	2.73282e-07	0.000154591	-0.359939	IMR90	NA	TRUE	229708	2.068	Cells_EBV-transformed_lymphocytes	6.806	Muscle_Skeletal	0.5811
rs7202877	16	75247244	TMEM170A	16	75476952	75499395	Skin_Sun_Exposed_Lower_leg	9.3788e-09	7.25581e-06	-0.318689	IMR90	NA	TRUE	229708	1.925	Cells_EBV-transformed_lymphocytes	6.806	Muscle_Skeletal	0.5811
rs7221109	17	38770285	CCR7	17	38710021	38721724	Cells_EBV-transformed_lymphocytes	0.000138178	0.0356854	0.353674	KBM7	NA	TRUE	48561	80.35	Cells_EBV-transformed_lymphocytes	80.35	Brain_Cerebellar_Hemisphere	0.04012
rs7221109	17	38770285	SMARCE1	17	38781214	38804760	Adipose_Subcutaneous	2.24433e-15	4.483e-12	-0.3107	IMR90	NA	TRUE	10929	13.9	Uterus	19.25	Whole_Blood	3.505
rs7221109	17	38770285	SMARCE1	17	38781214	38804760	Adipose_Visceral_Omentum	2.13268e-11	2.53877e-08	-0.309847	IMR90	NA	TRUE	10929	11.09	Uterus	19.25	Whole_Blood	3.505
rs7221109	17	38770285	SMARCE1	17	38781214	38804760	Adrenal_Gland	1.54491e-08	1.11244e-05	-0.281383	IMR90	NA	TRUE	10929	9.053	Uterus	19.25	Whole_Blood	3.505
rs7221109	17	38770285	SMARCE1	17	38781214	38804760	Artery_Aorta	4.24547e-17	1.04965e-13	-0.30596	IMR90	NA	TRUE	10929	11.65	Uterus	19.25	Whole_Blood	3.505
rs7221109	17	38770285	SMARCE1	17	38781214	38804760	Artery_Coronary	1.79011e-09	1.57047e-06	-0.276612	IMR90	NA	TRUE	10929	12.18	Uterus	19.25	Whole_Blood	3.505
rs7221109	17	38770285	SMARCE1	17	38781214	38804760	Artery_Tibial	1.08355e-38	1.00814e-34	-0.359156	IMR90	NA	TRUE	10929	14.8	Uterus	19.25	Whole_Blood	3.505
rs7221109	17	38770285	SMARCE1	17	38781214	38804760	Breast_Mammary_Tissue	1.48251e-06	0.000703133	-0.204149	IMR90	NA	TRUE	10929	12.9	Uterus	19.25	Whole_Blood	3.505
rs7221109	17	38770285	SMARCE1	17	38781214	38804760	Cells_Transformed_fibroblasts	4.23003e-21	1.42432e-17	-0.382254	IMR90	NA	TRUE	10929	15.44	Uterus	19.25	Whole_Blood	3.505
rs7221109	17	38770285	SMARCE1	17	38781214	38804760	Colon_Sigmoid	1.32596e-11	1.61099e-08	-0.267452	IMR90	NA	TRUE	10929	13.43	Uterus	19.25	Whole_Blood	3.505
rs7221109	17	38770285	SMARCE1	17	38781214	38804760	Esophagus_Gastroesophageal_Junction	4.07058e-14	6.98625e-11	-0.286362	IMR90	NA	TRUE	10929	13.27	Uterus	19.25	Whole_Blood	3.505
rs7221109	17	38770285	SMARCE1	17	38781214	38804760	Esophagus_Mucosa	2.98157e-18	8.0469e-15	-0.24726	IMR90	NA	TRUE	10929	9.53	Uterus	19.25	Whole_Blood	3.505
rs7221109	17	38770285	SMARCE1	17	38781214	38804760	Esophagus_Muscularis	1.59509e-19	4.86162e-16	-0.2466	IMR90	NA	TRUE	10929	13.38	Uterus	19.25	Whole_Blood	3.505
rs7221109	17	38770285	SMARCE1	17	38781214	38804760	Heart_Atrial_Appendage	8.42558e-06	0.0032735	-0.184011	IMR90	NA	TRUE	10929	6.964	Uterus	19.25	Whole_Blood	3.505
rs7221109	17	38770285	SMARCE1	17	38781214	38804760	Lung	3.83367e-14	6.61173e-11	-0.225259	IMR90	NA	TRUE	10929	10.42	Uterus	19.25	Whole_Blood	3.505
rs7221109	17	38770285	SMARCE1	17	38781214	38804760	Nerve_Tibial	9.9724e-12	1.22423e-08	-0.234489	IMR90	NA	TRUE	10929	15.46	Uterus	19.25	Whole_Blood	3.505
rs7221109	17	38770285	SMARCE1	17	38781214	38804760	Pancreas	1.40428e-05	0.00507362	-0.228321	IMR90	NA	TRUE	10929	5.375	Uterus	19.25	Whole_Blood	3.505
rs7221109	17	38770285	SMARCE1	17	38781214	38804760	Skin_Not_Sun_Exposed_Suprapubic	9.54029e-11	1.00988e-07	-0.206816	IMR90	NA	TRUE	10929	10.43	Uterus	19.25	Whole_Blood	3.505
rs7221109	17	38770285	SMARCE1	17	38781214	38804760	Skin_Sun_Exposed_Lower_leg	6.4035e-21	2.11587e-17	-0.268391	IMR90	NA	TRUE	10929	10.92	Uterus	19.25	Whole_Blood	3.505
rs7221109	17	38770285	SMARCE1	17	38781214	38804760	Spleen	9.71885e-05	0.0268447	-0.197859	IMR90	NA	TRUE	10929	12.41	Uterus	19.25	Whole_Blood	3.505
rs7221109	17	38770285	SMARCE1	17	38781214	38804760	Stomach	1.3959e-10	1.44305e-07	-0.226452	IMR90	NA	TRUE	10929	8.809	Uterus	19.25	Whole_Blood	3.505
rs7221109	17	38770285	SMARCE1	17	38781214	38804760	Thyroid	1.85327e-13	2.86126e-10	-0.204314	IMR90	NA	TRUE	10929	11.37	Uterus	19.25	Whole_Blood	3.505
rs7221109	17	38770285	SMARCE1	17	38781214	38804760	Vagina	9.92201e-07	0.000492	-0.287954	IMR90	NA	TRUE	10929	12.17	Uterus	19.25	Whole_Blood	3.505
rs72743477	15	67464290	AAGAB	15	67493371	67547533	Esophagus_Mucosa	2.4489e-05	0.00829327	-0.147683	KBM7	NA	TRUE	29081	9.831	Testis	14	Whole_Blood	3.801
rs72743477	15	67464290	SMAD3	15	67356101	67487533	Esophagus_Mucosa	9.01055e-05	0.0252834	0.210965	KBM7	NA	TRUE	0	17.02	Thyroid	20.19	Brain_Cerebellar_Hemisphere	1.302
rs72743477	15	67464290	SMAD3	15	67356101	67487533	Thyroid	3.7364e-20	1.17948e-16	-0.476048	KBM7	NA	TRUE	0	20.19	Thyroid	20.19	Brain_Cerebellar_Hemisphere	1.302
rs72743477	15	67464290	SMAD3	15	67356101	67487533	Whole_Blood	0.000180786	0.0446293	-0.0868018	KBM7	NA	TRUE	0	2.09	Thyroid	20.19	Brain_Cerebellar_Hemisphere	1.302
rs7588550	2	213168767	ERBB4	2	212240446	213403565	Pituitary	5.17009e-07	0.000274872	0.672499	KBM7	NA	TRUE	0	1.002	Brain_Anterior_cingulate_cortex_BA24	4.536	Whole_Blood	0.002196
rs763361	18	67531641	CD226	18	67498394	67629039	Brain_Nucleus_accumbens_basal_ganglia	8.67976e-05	0.0245108	0.31002	KBM7	NA	TRUE	0	0.1615	Cells_EBV-transformed_lymphocytes	33.68	Brain_Anterior_cingulate_cortex_BA24	0.04193
rs763361	18	67531641	CD226	18	67498394	67629039	Heart_Atrial_Appendage	4.19455e-06	0.00176968	0.336479	KBM7	NA	TRUE	0	0.0802	Cells_EBV-transformed_lymphocytes	33.68	Brain_Anterior_cingulate_cortex_BA24	0.04193
rs763361	18	67531641	CD226	18	67498394	67629039	Testis	3.68019e-09	3.06151e-06	0.486918	KBM7	NA	TRUE	0	0.4772	Cells_EBV-transformed_lymphocytes	33.68	Brain_Anterior_cingulate_cortex_BA24	0.04193
rs763361	18	67531641	DOK6	18	67068291	67516323	Small_Intestine_Terminal_Ileum	8.91409e-06	0.00342194	-0.361871	KBM7	NA	TRUE	15318	0.148	Brain_Anterior_cingulate_cortex_BA24	10.5	Muscle_Skeletal	0.02837
rs763361	18	67531641	DOK6	18	67068291	67516323	Spleen	2.58486e-08	1.78145e-05	-0.403282	KBM7	NA	TRUE	15318	0.2191	Brain_Anterior_cingulate_cortex_BA24	10.5	Muscle_Skeletal	0.02837
rs763361	18	67531641	DOK6	18	67068291	67516323	Whole_Blood	3.60751e-05	0.0116267	-0.19419	KBM7	NA	TRUE	15318	0.04625	Brain_Anterior_cingulate_cortex_BA24	10.5	Muscle_Skeletal	0.02837
rs7672495	4	4992366	EVC	4	5712924	5830772	Brain_Caudate_basal_ganglia	0.000109844	0.0295386	-0.252772	KBM7	NA	TRUE	720558	1.023	Ovary	14.74	Whole_Blood	0.05801
rs77150043	16	50304248	BRD7	16	50347398	50402845	Whole_Blood	1.3968e-05	0.0050547	-0.239855	KBM7	NA	TRUE	43150	4.431	Testis	17.34	Liver	3.124
rs7731626	5	55444682	ANKRD55	5	55395507	55529186	Spleen	1.7408e-05	0.00612404	-0.493301	KBM7	NA	TRUE	0	0.8354	Testis	3.041	Muscle_Skeletal	0
rs7804356	7	26891664	HOXA5	7	27180671	27183287	Adipose_Subcutaneous	0.000115043	0.030651	0.224678	KBM7	NA	TRUE	289007	3.302	Fallopian_Tube	39.67	Brain_Amygdala	0
rs7804356	7	26891664	HOXA5	7	27180671	27183287	Thyroid	9.20594e-05	0.0256889	0.246502	KBM7	NA	TRUE	289007	0.8224	Fallopian_Tube	39.67	Brain_Amygdala	0
rs7804356	7	26891664	SKAP2	7	26706681	27034858	Artery_Tibial	0.000146861	0.0376801	0.246835	KBM7	NA	TRUE	0	6.131	Whole_Blood	17.28	Heart_Left_Ventricle	0.6276
rs7804356	7	26891664	SKAP2	7	26706681	27034858	Brain_Cerebellum	1.03916e-06	0.000512408	-0.658205	KBM7	NA	TRUE	0	1.672	Whole_Blood	17.28	Heart_Left_Ventricle	0.6276
rs7804356	7	26891664	SKAP2	7	26706681	27034858	Brain_Cortex	0.00011016	0.0295728	-0.196694	KBM7	NA	TRUE	0	2.991	Whole_Blood	17.28	Heart_Left_Ventricle	0.6276
rs7804356	7	26891664	SKAP2	7	26706681	27034858	Whole_Blood	4.09646e-06	0.00173243	0.134468	KBM7	NA	TRUE	0	17.28	Whole_Blood	17.28	Heart_Left_Ventricle	0.6276
rs8035957	15	38838263	RASGRP1	15	38780304	38857776	Esophagus_Mucosa	2.01814e-25	9.03191e-22	0.408032	KBM7	NA	TRUE	0	2.925	Brain_Cerebellar_Hemisphere	16.94	Muscle_Skeletal	0.0575
rs8035957	15	38838263	RASGRP1	15	38780304	38857776	Skin_Not_Sun_Exposed_Suprapubic	1.12251e-26	5.66954e-23	0.586382	KBM7	NA	TRUE	0	3.62	Brain_Cerebellar_Hemisphere	16.94	Muscle_Skeletal	0.0575
rs8035957	15	38838263	RASGRP1	15	38780304	38857776	Skin_Sun_Exposed_Lower_leg	1.51406e-29	9.55892e-26	0.553314	KBM7	NA	TRUE	0	3.948	Brain_Cerebellar_Hemisphere	16.94	Muscle_Skeletal	0.0575
rs8035957	15	38838263	RASGRP1	15	38780304	38857776	Testis	3.83204e-06	0.00163429	-0.270885	KBM7	NA	TRUE	0	0.9849	Brain_Cerebellar_Hemisphere	16.94	Muscle_Skeletal	0.0575
rs8035957	15	38838263	RP11-102L12.2	15	38795054	38797182	Esophagus_Mucosa	1.44751e-08	1.05619e-05	0.317836	NHEK	NA	TRUE	41081	0.1558	Brain_Cerebellum	1.299	Liver	0.02424
rs8035957	15	38838263	RP11-102L12.2	15	38795054	38797182	Skin_Not_Sun_Exposed_Suprapubic	9.3028e-05	0.0259089	0.22556	NHEK	NA	TRUE	41081	0.2727	Brain_Cerebellum	1.299	Liver	0.02424
rs8035957	15	38838263	RP11-102L12.2	15	38795054	38797182	Skin_Sun_Exposed_Lower_leg	2.27421e-07	0.000131167	0.273153	NHEK	NA	TRUE	41081	0.3332	Brain_Cerebellum	1.299	Liver	0.02424
rs836589	2	173493077	PDK1	2	173420101	173489823	Artery_Tibial	6.69911e-06	0.00266722	0.168965	KBM7	NA	TRUE	3254	2.17	Cells_EBV-transformed_lymphocytes	7.598	Brain_Putamen_basal_ganglia	0.3824
rs836589	2	173493077	PDK1	2	173420101	173489823	Brain_Cerebellum	3.09658e-08	2.11352e-05	0.475456	KBM7	NA	TRUE	3254	0.8526	Cells_EBV-transformed_lymphocytes	7.598	Brain_Putamen_basal_ganglia	0.3824
rs836589	2	173493077	PDK1	2	173420101	173489823	Cells_Transformed_fibroblasts	2.13792e-05	0.00734897	0.138783	KBM7	NA	TRUE	3254	1.521	Cells_EBV-transformed_lymphocytes	7.598	Brain_Putamen_basal_ganglia	0.3824
rs836589	2	173493077	PDK1	2	173420101	173489823	Heart_Atrial_Appendage	8.82659e-06	0.0034058	0.212065	KBM7	NA	TRUE	3254	2.195	Cells_EBV-transformed_lymphocytes	7.598	Brain_Putamen_basal_ganglia	0.3824
rs836589	2	173493077	PDK1	2	173420101	173489823	Heart_Left_Ventricle	6.51903e-05	0.0193195	0.146341	KBM7	NA	TRUE	3254	1.827	Cells_EBV-transformed_lymphocytes	7.598	Brain_Putamen_basal_ganglia	0.3824
rs836589	2	173493077	PDK1	2	173420101	173489823	Muscle_Skeletal	3.41176e-11	3.92912e-08	0.281626	KBM7	NA	TRUE	3254	0.7931	Cells_EBV-transformed_lymphocytes	7.598	Brain_Putamen_basal_ganglia	0.3824
rs836589	2	173493077	PDK1	2	173420101	173489823	Whole_Blood	3.9053e-09	3.23356e-06	0.153323	KBM7	NA	TRUE	3254	1.373	Cells_EBV-transformed_lymphocytes	7.598	Brain_Putamen_basal_ganglia	0.3824
rs836589	2	173493077	RAPGEF4-AS1	2	173541869	173600934	Brain_Frontal_Cortex_BA9	4.82274e-06	0.0019966	-0.397049	KBM7	NA	TRUE	48792	0.3481	Brain_Nucleus_accumbens_basal_ganglia	0.4544	Adrenal_Gland	0
rs886424	6	30782001	FLOT1	6	30695486	30710510	Adipose_Subcutaneous	1.63108e-05	0.00579573	0.223881	KBM7	NA	TRUE	71491	83.36	Whole_Blood	204.1	Skin_Not_Sun_Exposed_Suprapubic	29.48
rs886424	6	30782001	FLOT1	6	30695486	30710510	Adipose_Visceral_Omentum	1.0586e-06	0.000520542	0.238705	KBM7	NA	TRUE	71491	86.28	Whole_Blood	204.1	Skin_Not_Sun_Exposed_Suprapubic	29.48
rs886424	6	30782001	FLOT1	6	30695486	30710510	Artery_Tibial	2.01429e-05	0.00700253	0.162668	KBM7	NA	TRUE	71491	72.33	Whole_Blood	204.1	Skin_Not_Sun_Exposed_Suprapubic	29.48
rs886424	6	30782001	FLOT1	6	30695486	30710510	Brain_Cerebellar_Hemisphere	0.000182674	0.0450069	0.440737	KBM7	NA	TRUE	71491	104.6	Whole_Blood	204.1	Skin_Not_Sun_Exposed_Suprapubic	29.48
rs886424	6	30782001	FLOT1	6	30695486	30710510	Brain_Cerebellum	1.31284e-09	1.19015e-06	0.709916	KBM7	NA	TRUE	71491	91.47	Whole_Blood	204.1	Skin_Not_Sun_Exposed_Suprapubic	29.48
rs886424	6	30782001	FLOT1	6	30695486	30710510	Breast_Mammary_Tissue	9.06026e-06	0.00346301	0.190542	KBM7	NA	TRUE	71491	86.55	Whole_Blood	204.1	Skin_Not_Sun_Exposed_Suprapubic	29.48
rs886424	6	30782001	FLOT1	6	30695486	30710510	Lung	3.19265e-11	3.70089e-08	0.245695	KBM7	NA	TRUE	71491	96.6	Whole_Blood	204.1	Skin_Not_Sun_Exposed_Suprapubic	29.48
rs886424	6	30782001	FLOT1	6	30695486	30710510	Nerve_Tibial	1.14415e-06	0.000554895	0.226114	KBM7	NA	TRUE	71491	80.17	Whole_Blood	204.1	Skin_Not_Sun_Exposed_Suprapubic	29.48
rs886424	6	30782001	FLOT1	6	30695486	30710510	Pancreas	8.44072e-05	0.0240084	0.266966	KBM7	NA	TRUE	71491	32.63	Whole_Blood	204.1	Skin_Not_Sun_Exposed_Suprapubic	29.48
rs886424	6	30782001	FLOT1	6	30695486	30710510	Pituitary	4.77723e-06	0.00198473	0.394712	KBM7	NA	TRUE	71491	80.04	Whole_Blood	204.1	Skin_Not_Sun_Exposed_Suprapubic	29.48
rs886424	6	30782001	FLOT1	6	30695486	30710510	Skin_Sun_Exposed_Lower_leg	5.06287e-05	0.0155923	0.115127	KBM7	NA	TRUE	71491	32.31	Whole_Blood	204.1	Skin_Not_Sun_Exposed_Suprapubic	29.48
rs886424	6	30782001	FLOT1	6	30695486	30710510	Thyroid	1.47092e-14	2.6533e-11	0.398268	KBM7	NA	TRUE	71491	83.98	Whole_Blood	204.1	Skin_Not_Sun_Exposed_Suprapubic	29.48
rs886424	6	30782001	FLOT1	6	30695486	30710510	Whole_Blood	3.16258e-06	0.00138042	0.105077	KBM7	NA	TRUE	71491	204.1	Whole_Blood	204.1	Skin_Not_Sun_Exposed_Suprapubic	29.48
rs886424	6	30782001	HCG17	6	30201816	30293911	Brain_Cortex	0.000116919	0.0310283	-0.683865	KBM7	NA	TRUE	488090	0.7366	Pituitary	0.9571	Whole_Blood	0
rs886424	6	30782001	HCG20	6	30734602	30760027	Cells_Transformed_fibroblasts	7.78328e-06	0.00305756	-0.559065	KBM7	NA	TRUE	21974	0.04271	Testis	0.4859	Muscle_Skeletal	0
rs886424	6	30782001	HCG20	6	30734602	30760027	Pituitary	0.000142403	0.0366693	-0.687363	KBM7	NA	TRUE	21974	0.1677	Testis	0.4859	Muscle_Skeletal	0
rs886424	6	30782001	HCP5	6	31368479	31445283	Pituitary	0.000121611	0.0320865	-0.624253	KBM7	NA	TRUE	586478	4.624	Cells_EBV-transformed_lymphocytes	50.71	Cells_Transformed_fibroblasts	0.1231
rs886424	6	30782001	HCP5	6	31368479	31445283	Skin_Sun_Exposed_Lower_leg	0.000143332	0.0368549	-0.235256	KBM7	NA	TRUE	586478	15.29	Cells_EBV-transformed_lymphocytes	50.71	Cells_Transformed_fibroblasts	0.1231
rs886424	6	30782001	HCP5	6	31368479	31445283	Thyroid	8.77022e-05	0.0247007	-0.277476	KBM7	NA	TRUE	586478	5.525	Cells_EBV-transformed_lymphocytes	50.71	Cells_Transformed_fibroblasts	0.1231
rs886424	6	30782001	HLA-L	6	30227361	30260791	Whole_Blood	4.38458e-05	0.0137428	-0.482822	KBM7	NA	TRUE	521210	0.5306	Cells_EBV-transformed_lymphocytes	3.059	Liver	0.1166
rs886424	6	30782001	IER3	6	30710976	30712331	Esophagus_Mucosa	2.49271e-06	0.00112562	0.318567	NHEK	NA	TRUE	69670	68.38	Vagina	75.22	Brain_Cerebellar_Hemisphere	1.317
rs886424	6	30782001	IER3	6	30710976	30712331	Whole_Blood	0.000191443	0.046841	0.293363	NHEK	NA	TRUE	69670	24.92	Vagina	75.22	Brain_Cerebellar_Hemisphere	1.317
rs886424	6	30782001	LINC00243	6	30766431	30798436	Esophagus_Mucosa	1.59536e-07	9.51169e-05	0.580674	KBM7	NA	TRUE	0	0.03198	Whole_Blood	0.3975	Artery_Tibial	0
rs886424	6	30782001	LINC00243	6	30766431	30798436	Lung	1.73531e-05	0.0061169	0.440089	KBM7	NA	TRUE	0	0.1104	Whole_Blood	0.3975	Artery_Tibial	0
rs886424	6	30782001	LINC00243	6	30766431	30798436	Skin_Sun_Exposed_Lower_leg	0.000104218	0.0284969	0.440409	KBM7	NA	TRUE	0	0.01849	Whole_Blood	0.3975	Artery_Tibial	0
rs886424	6	30782001	LINC00243	6	30766431	30798436	Whole_Blood	2.71778e-12	3.62596e-09	0.545872	KBM7	NA	TRUE	0	0.3975	Whole_Blood	0.3975	Artery_Tibial	0
rs886424	6	30782001	PPP1R18	6	30644166	30655672	Artery_Aorta	6.17587e-12	7.91122e-09	-0.436566	IMR90	NA	TRUE	126329	31.13	Whole_Blood	112	Brain_Cerebellar_Hemisphere	2.289
rs886424	6	30782001	PPP1R18	6	30644166	30655672	Artery_Tibial	8.09884e-06	0.00317095	-0.216404	IMR90	NA	TRUE	126329	24.96	Whole_Blood	112	Brain_Cerebellar_Hemisphere	2.289
rs886424	6	30782001	PPP1R18	6	30644166	30655672	Esophagus_Muscularis	1.07231e-08	8.15312e-06	-0.340822	IMR90	NA	TRUE	126329	19.55	Whole_Blood	112	Brain_Cerebellar_Hemisphere	2.289
rs886424	6	30782001	PPP1R18	6	30644166	30655672	Lung	0.000105222	0.0287493	-0.14081	IMR90	NA	TRUE	126329	30.63	Whole_Blood	112	Brain_Cerebellar_Hemisphere	2.289
rs886424	6	30782001	PPP1R18	6	30644166	30655672	Nerve_Tibial	3.20073e-05	0.0105268	-0.213452	IMR90	NA	TRUE	126329	23.76	Whole_Blood	112	Brain_Cerebellar_Hemisphere	2.289
rs886424	6	30782001	PPP1R18	6	30644166	30655672	Prostate	3.28747e-05	0.010752	-0.323534	IMR90	NA	TRUE	126329	13.89	Whole_Blood	112	Brain_Cerebellar_Hemisphere	2.289
rs886424	6	30782001	PPP1R18	6	30644166	30655672	Thyroid	4.61197e-07	0.000247808	-0.225099	IMR90	NA	TRUE	126329	13.17	Whole_Blood	112	Brain_Cerebellar_Hemisphere	2.289
rs886424	6	30782001	PPP1R18	6	30644166	30655672	Uterus	2.46607e-05	0.00834342	-0.557609	IMR90	NA	TRUE	126329	23.84	Whole_Blood	112	Brain_Cerebellar_Hemisphere	2.289
rs886424	6	30782001	RNF39	6	30038043	30043664	Pancreas	1.39561e-05	0.0050547	0.541366	KBM7	NA	TRUE	738337	0.6704	Skin_Not_Sun_Exposed_Suprapubic	37.84	Heart_Left_Ventricle	0.06896
rs9268645	6	32408526	ATF6B	6	32065953	32096030	Adipose_Subcutaneous	9.59231e-05	0.0265575	0.136038	KBM7	NA	TRUE	312496	27.44	Spleen	53.3	Muscle_Skeletal	7.505
rs9268645	6	32408526	ATF6B	6	32065953	32096030	Cells_Transformed_fibroblasts	8.04174e-05	0.0231529	0.177797	KBM7	NA	TRUE	312496	35.78	Spleen	53.3	Muscle_Skeletal	7.505
rs9268645	6	32408526	ATF6B	6	32065953	32096030	Esophagus_Mucosa	0.000107728	0.029176	0.156483	KBM7	NA	TRUE	312496	37.93	Spleen	53.3	Muscle_Skeletal	7.505
rs9268645	6	32408526	ATF6B	6	32065953	32096030	Heart_Left_Ventricle	1.64305e-07	9.76312e-05	0.280669	KBM7	NA	TRUE	312496	11.32	Spleen	53.3	Muscle_Skeletal	7.505
rs9268645	6	32408526	ATF6B	6	32065953	32096030	Muscle_Skeletal	2.7152e-06	0.00121055	0.134812	KBM7	NA	TRUE	312496	7.505	Spleen	53.3	Muscle_Skeletal	7.505
rs9268645	6	32408526	ATF6B	6	32065953	32096030	Pancreas	0.000111899	0.0299714	0.230175	KBM7	NA	TRUE	312496	19.67	Spleen	53.3	Muscle_Skeletal	7.505
rs9268645	6	32408526	HLA-DQA2	6	32709119	32714992	Adipose_Subcutaneous	9.25373e-17	2.18112e-13	0.589214	HUVEC	NA	TRUE	300593	2.543	Cells_EBV-transformed_lymphocytes	43.27	Cells_Transformed_fibroblasts	0
rs9268645	6	32408526	HLA-DQA2	6	32709119	32714992	Adipose_Visceral_Omentum	1.9482e-12	2.65943e-09	0.591233	HUVEC	NA	TRUE	300593	1.07	Cells_EBV-transformed_lymphocytes	43.27	Cells_Transformed_fibroblasts	0
rs9268645	6	32408526	HLA-DQA2	6	32709119	32714992	Adrenal_Gland	3.89664e-08	2.60922e-05	0.663642	HUVEC	NA	TRUE	300593	0.533	Cells_EBV-transformed_lymphocytes	43.27	Cells_Transformed_fibroblasts	0
rs9268645	6	32408526	HLA-DQA2	6	32709119	32714992	Artery_Aorta	3.32106e-09	2.80232e-06	0.448456	HUVEC	NA	TRUE	300593	1.356	Cells_EBV-transformed_lymphocytes	43.27	Cells_Transformed_fibroblasts	0
rs9268645	6	32408526	HLA-DQA2	6	32709119	32714992	Artery_Coronary	1.01826e-08	7.81023e-06	0.629851	HUVEC	NA	TRUE	300593	1.375	Cells_EBV-transformed_lymphocytes	43.27	Cells_Transformed_fibroblasts	0
rs9268645	6	32408526	HLA-DQA2	6	32709119	32714992	Artery_Tibial	3.01848e-17	7.51543e-14	0.531244	HUVEC	NA	TRUE	300593	0.654	Cells_EBV-transformed_lymphocytes	43.27	Cells_Transformed_fibroblasts	0
rs9268645	6	32408526	HLA-DQA2	6	32709119	32714992	Brain_Amygdala	1.47538e-08	1.07331e-05	0.717852	HUVEC	NA	TRUE	300593	0.1337	Cells_EBV-transformed_lymphocytes	43.27	Cells_Transformed_fibroblasts	0
rs9268645	6	32408526	HLA-DQA2	6	32709119	32714992	Brain_Anterior_cingulate_cortex_BA24	2.99222e-06	0.00131581	0.59172	HUVEC	NA	TRUE	300593	0.06611	Cells_EBV-transformed_lymphocytes	43.27	Cells_Transformed_fibroblasts	0
rs9268645	6	32408526	HLA-DQA2	6	32709119	32714992	Brain_Caudate_basal_ganglia	4.49118e-07	0.000242794	0.5578	HUVEC	NA	TRUE	300593	0.1219	Cells_EBV-transformed_lymphocytes	43.27	Cells_Transformed_fibroblasts	0
rs9268645	6	32408526	HLA-DQA2	6	32709119	32714992	Brain_Cerebellum	1.1943e-05	0.00445188	0.507521	HUVEC	NA	TRUE	300593	0.0232	Cells_EBV-transformed_lymphocytes	43.27	Cells_Transformed_fibroblasts	0
rs9268645	6	32408526	HLA-DQA2	6	32709119	32714992	Brain_Cortex	1.55284e-06	0.000733972	0.569616	HUVEC	NA	TRUE	300593	0.06026	Cells_EBV-transformed_lymphocytes	43.27	Cells_Transformed_fibroblasts	0
rs9268645	6	32408526	HLA-DQA2	6	32709119	32714992	Brain_Frontal_Cortex_BA9	2.92891e-07	0.000164631	0.685102	HUVEC	NA	TRUE	300593	0.05492	Cells_EBV-transformed_lymphocytes	43.27	Cells_Transformed_fibroblasts	0
rs9268645	6	32408526	HLA-DQA2	6	32709119	32714992	Brain_Hippocampus	1.65252e-06	0.000774874	0.580535	HUVEC	NA	TRUE	300593	0.137	Cells_EBV-transformed_lymphocytes	43.27	Cells_Transformed_fibroblasts	0
rs9268645	6	32408526	HLA-DQA2	6	32709119	32714992	Brain_Nucleus_accumbens_basal_ganglia	8.50678e-07	0.000428433	0.530652	HUVEC	NA	TRUE	300593	0.08069	Cells_EBV-transformed_lymphocytes	43.27	Cells_Transformed_fibroblasts	0
rs9268645	6	32408526	HLA-DQA2	6	32709119	32714992	Brain_Spinal_cord_cervical_c-1	8.4713e-05	0.024076	0.612963	HUVEC	NA	TRUE	300593	1.252	Cells_EBV-transformed_lymphocytes	43.27	Cells_Transformed_fibroblasts	0
rs9268645	6	32408526	HLA-DQA2	6	32709119	32714992	Breast_Mammary_Tissue	4.44332e-14	7.55265e-11	0.678194	HUVEC	NA	TRUE	300593	1.667	Cells_EBV-transformed_lymphocytes	43.27	Cells_Transformed_fibroblasts	0
rs9268645	6	32408526	HLA-DQA2	6	32709119	32714992	Cells_EBV-transformed_lymphocytes	5.36516e-09	4.36062e-06	0.687087	HUVEC	NA	TRUE	300593	43.27	Cells_EBV-transformed_lymphocytes	43.27	Cells_Transformed_fibroblasts	0
rs9268645	6	32408526	HLA-DQA2	6	32709119	32714992	Colon_Sigmoid	2.15079e-11	2.55174e-08	0.667021	HUVEC	NA	TRUE	300593	0.3591	Cells_EBV-transformed_lymphocytes	43.27	Cells_Transformed_fibroblasts	0
rs9268645	6	32408526	HLA-DQA2	6	32709119	32714992	Esophagus_Gastroesophageal_Junction	2.83297e-13	4.26215e-10	0.679269	HUVEC	NA	TRUE	300593	0.4895	Cells_EBV-transformed_lymphocytes	43.27	Cells_Transformed_fibroblasts	0
rs9268645	6	32408526	HLA-DQA2	6	32709119	32714992	Esophagus_Mucosa	8.80199e-13	1.24479e-09	0.453082	HUVEC	NA	TRUE	300593	0.8477	Cells_EBV-transformed_lymphocytes	43.27	Cells_Transformed_fibroblasts	0
rs9268645	6	32408526	HLA-DQA2	6	32709119	32714992	Esophagus_Muscularis	1.00563e-13	1.62348e-10	0.557371	HUVEC	NA	TRUE	300593	0.5511	Cells_EBV-transformed_lymphocytes	43.27	Cells_Transformed_fibroblasts	0
rs9268645	6	32408526	HLA-DQA2	6	32709119	32714992	Heart_Atrial_Appendage	3.15999e-13	4.67458e-10	0.636651	HUVEC	NA	TRUE	300593	0.2605	Cells_EBV-transformed_lymphocytes	43.27	Cells_Transformed_fibroblasts	0
rs9268645	6	32408526	HLA-DQA2	6	32709119	32714992	Heart_Left_Ventricle	9.37647e-12	1.15508e-08	0.536585	HUVEC	NA	TRUE	300593	0.2182	Cells_EBV-transformed_lymphocytes	43.27	Cells_Transformed_fibroblasts	0
rs9268645	6	32408526	HLA-DQA2	6	32709119	32714992	Liver	3.08912e-08	2.11251e-05	0.627035	HUVEC	NA	TRUE	300593	0.1886	Cells_EBV-transformed_lymphocytes	43.27	Cells_Transformed_fibroblasts	0
rs9268645	6	32408526	HLA-DQA2	6	32709119	32714992	Lung	7.15821e-14	1.19248e-10	0.516738	HUVEC	NA	TRUE	300593	6.081	Cells_EBV-transformed_lymphocytes	43.27	Cells_Transformed_fibroblasts	0
rs9268645	6	32408526	HLA-DQA2	6	32709119	32714992	Minor_Salivary_Gland	0.000171869	0.0428828	0.533786	HUVEC	NA	TRUE	300593	0.9576	Cells_EBV-transformed_lymphocytes	43.27	Cells_Transformed_fibroblasts	0
rs9268645	6	32408526	HLA-DQA2	6	32709119	32714992	Muscle_Skeletal	7.53265e-19	2.14773e-15	0.544154	HUVEC	NA	TRUE	300593	0.1375	Cells_EBV-transformed_lymphocytes	43.27	Cells_Transformed_fibroblasts	0
rs9268645	6	32408526	HLA-DQA2	6	32709119	32714992	Nerve_Tibial	1.18628e-18	3.27667e-15	0.643594	HUVEC	NA	TRUE	300593	1.91	Cells_EBV-transformed_lymphocytes	43.27	Cells_Transformed_fibroblasts	0
rs9268645	6	32408526	HLA-DQA2	6	32709119	32714992	Pancreas	9.5995e-08	5.95427e-05	0.429974	HUVEC	NA	TRUE	300593	0.1309	Cells_EBV-transformed_lymphocytes	43.27	Cells_Transformed_fibroblasts	0
rs9268645	6	32408526	HLA-DQA2	6	32709119	32714992	Pituitary	2.64326e-08	1.81462e-05	0.611276	HUVEC	NA	TRUE	300593	0.5106	Cells_EBV-transformed_lymphocytes	43.27	Cells_Transformed_fibroblasts	0
rs9268645	6	32408526	HLA-DQA2	6	32709119	32714992	Prostate	8.95665e-08	5.61359e-05	0.648743	HUVEC	NA	TRUE	300593	0.6353	Cells_EBV-transformed_lymphocytes	43.27	Cells_Transformed_fibroblasts	0
rs9268645	6	32408526	HLA-DQA2	6	32709119	32714992	Skin_Not_Sun_Exposed_Suprapubic	1.02452e-10	1.08126e-07	0.413957	HUVEC	NA	TRUE	300593	3.754	Cells_EBV-transformed_lymphocytes	43.27	Cells_Transformed_fibroblasts	0
rs9268645	6	32408526	HLA-DQA2	6	32709119	32714992	Skin_Sun_Exposed_Lower_leg	2.4959e-15	4.95748e-12	0.462472	HUVEC	NA	TRUE	300593	3.238	Cells_EBV-transformed_lymphocytes	43.27	Cells_Transformed_fibroblasts	0
rs9268645	6	32408526	HLA-DQA2	6	32709119	32714992	Small_Intestine_Terminal_Ileum	5.19062e-06	0.00211668	0.524929	HUVEC	NA	TRUE	300593	2.698	Cells_EBV-transformed_lymphocytes	43.27	Cells_Transformed_fibroblasts	0
rs9268645	6	32408526	HLA-DQA2	6	32709119	32714992	Spleen	3.36394e-06	0.00145573	0.496478	HUVEC	NA	TRUE	300593	10.29	Cells_EBV-transformed_lymphocytes	43.27	Cells_Transformed_fibroblasts	0
rs9268645	6	32408526	HLA-DQA2	6	32709119	32714992	Stomach	1.43044e-11	1.73198e-08	0.507504	HUVEC	NA	TRUE	300593	0.3999	Cells_EBV-transformed_lymphocytes	43.27	Cells_Transformed_fibroblasts	0
rs9268645	6	32408526	HLA-DQA2	6	32709119	32714992	Testis	2.48883e-10	2.47869e-07	0.560746	HUVEC	NA	TRUE	300593	0.3147	Cells_EBV-transformed_lymphocytes	43.27	Cells_Transformed_fibroblasts	0
rs9268645	6	32408526	HLA-DQA2	6	32709119	32714992	Thyroid	3.00803e-13	4.48733e-10	0.486311	HUVEC	NA	TRUE	300593	0.7888	Cells_EBV-transformed_lymphocytes	43.27	Cells_Transformed_fibroblasts	0
rs9268645	6	32408526	HLA-DQA2	6	32709119	32714992	Uterus	5.83006e-05	0.0175873	0.546512	HUVEC	NA	TRUE	300593	0.5091	Cells_EBV-transformed_lymphocytes	43.27	Cells_Transformed_fibroblasts	0
rs9268645	6	32408526	HLA-DQA2	6	32709119	32714992	Whole_Blood	3.12599e-18	8.37274e-15	0.560658	HUVEC	NA	TRUE	300593	1.408	Cells_EBV-transformed_lymphocytes	43.27	Cells_Transformed_fibroblasts	0
rs9268645	6	32408526	HLA-DQB1	6	32627244	32636160	Adipose_Subcutaneous	3.93006e-09	3.24646e-06	-0.345995	KBM7	NA	TRUE	218718	9.188	Cells_EBV-transformed_lymphocytes	69.61	Cells_Transformed_fibroblasts	0.0253
rs9268645	6	32408526	HLA-DQB1	6	32627244	32636160	Adipose_Visceral_Omentum	2.1078e-06	0.000967817	-0.335513	KBM7	NA	TRUE	218718	6.28	Cells_EBV-transformed_lymphocytes	69.61	Cells_Transformed_fibroblasts	0.0253
rs9268645	6	32408526	HLA-DQB1	6	32627244	32636160	Artery_Tibial	3.17822e-06	0.00138553	-0.248842	KBM7	NA	TRUE	218718	2.399	Cells_EBV-transformed_lymphocytes	69.61	Cells_Transformed_fibroblasts	0.0253
rs9268645	6	32408526	HLA-DQB1	6	32627244	32636160	Brain_Cerebellum	5.92964e-06	0.00238232	-0.448503	KBM7	NA	TRUE	218718	0.1686	Cells_EBV-transformed_lymphocytes	69.61	Cells_Transformed_fibroblasts	0.0253
rs9268645	6	32408526	HLA-DQB1	6	32627244	32636160	Brain_Putamen_basal_ganglia	1.01647e-06	0.000502623	-0.578036	KBM7	NA	TRUE	218718	0.3708	Cells_EBV-transformed_lymphocytes	69.61	Cells_Transformed_fibroblasts	0.0253
rs9268645	6	32408526	HLA-DQB1	6	32627244	32636160	Breast_Mammary_Tissue	1.60244e-05	0.0057054	-0.321426	KBM7	NA	TRUE	218718	9.094	Cells_EBV-transformed_lymphocytes	69.61	Cells_Transformed_fibroblasts	0.0253
rs9268645	6	32408526	HLA-DQB1	6	32627244	32636160	Colon_Sigmoid	0.000111432	0.0298917	-0.350177	KBM7	NA	TRUE	218718	2.181	Cells_EBV-transformed_lymphocytes	69.61	Cells_Transformed_fibroblasts	0.0253
rs9268645	6	32408526	HLA-DQB1	6	32627244	32636160	Esophagus_Gastroesophageal_Junction	5.10616e-05	0.0157119	-0.341217	KBM7	NA	TRUE	218718	1.629	Cells_EBV-transformed_lymphocytes	69.61	Cells_Transformed_fibroblasts	0.0253
rs9268645	6	32408526	HLA-DQB1	6	32627244	32636160	Esophagus_Mucosa	1.34608e-05	0.00492151	-0.280102	KBM7	NA	TRUE	218718	1.951	Cells_EBV-transformed_lymphocytes	69.61	Cells_Transformed_fibroblasts	0.0253
rs9268645	6	32408526	HLA-DQB1	6	32627244	32636160	Esophagus_Muscularis	1.33516e-05	0.00489172	-0.300402	KBM7	NA	TRUE	218718	1.865	Cells_EBV-transformed_lymphocytes	69.61	Cells_Transformed_fibroblasts	0.0253
rs9268645	6	32408526	HLA-DQB1	6	32627244	32636160	Heart_Atrial_Appendage	8.60122e-06	0.00333441	-0.384239	KBM7	NA	TRUE	218718	2.108	Cells_EBV-transformed_lymphocytes	69.61	Cells_Transformed_fibroblasts	0.0253
rs9268645	6	32408526	HLA-DQB1	6	32627244	32636160	Heart_Left_Ventricle	7.82223e-05	0.0226315	-0.302278	KBM7	NA	TRUE	218718	1.581	Cells_EBV-transformed_lymphocytes	69.61	Cells_Transformed_fibroblasts	0.0253
rs9268645	6	32408526	HLA-DQB1	6	32627244	32636160	Lung	3.01503e-06	0.00132255	-0.275982	KBM7	NA	TRUE	218718	19.07	Cells_EBV-transformed_lymphocytes	69.61	Cells_Transformed_fibroblasts	0.0253
rs9268645	6	32408526	HLA-DQB1	6	32627244	32636160	Muscle_Skeletal	6.84385e-10	6.4182e-07	-0.351174	KBM7	NA	TRUE	218718	0.8126	Cells_EBV-transformed_lymphocytes	69.61	Cells_Transformed_fibroblasts	0.0253
rs9268645	6	32408526	HLA-DQB1	6	32627244	32636160	Nerve_Tibial	5.61493e-07	0.000294974	-0.323571	KBM7	NA	TRUE	218718	6.488	Cells_EBV-transformed_lymphocytes	69.61	Cells_Transformed_fibroblasts	0.0253
rs9268645	6	32408526	HLA-DQB1	6	32627244	32636160	Prostate	7.36289e-05	0.0215494	-0.444963	KBM7	NA	TRUE	218718	2.655	Cells_EBV-transformed_lymphocytes	69.61	Cells_Transformed_fibroblasts	0.0253
rs9268645	6	32408526	HLA-DQB1	6	32627244	32636160	Skin_Not_Sun_Exposed_Suprapubic	4.1986e-09	3.45216e-06	-0.411343	KBM7	NA	TRUE	218718	4.231	Cells_EBV-transformed_lymphocytes	69.61	Cells_Transformed_fibroblasts	0.0253
rs9268645	6	32408526	HLA-DQB1	6	32627244	32636160	Skin_Sun_Exposed_Lower_leg	1.55606e-08	1.11819e-05	-0.36691	KBM7	NA	TRUE	218718	5.256	Cells_EBV-transformed_lymphocytes	69.61	Cells_Transformed_fibroblasts	0.0253
rs9268645	6	32408526	HLA-DQB1	6	32627244	32636160	Testis	1.33538e-07	8.07053e-05	-0.469213	KBM7	NA	TRUE	218718	1.003	Cells_EBV-transformed_lymphocytes	69.61	Cells_Transformed_fibroblasts	0.0253
rs9268645	6	32408526	HLA-DQB1	6	32627244	32636160	Thyroid	1.35484e-07	8.17417e-05	-0.310845	KBM7	NA	TRUE	218718	4.055	Cells_EBV-transformed_lymphocytes	69.61	Cells_Transformed_fibroblasts	0.0253
rs9268645	6	32408526	HLA-DQB1	6	32627244	32636160	Whole_Blood	2.34902e-12	3.16986e-09	-0.331675	KBM7	NA	TRUE	218718	8.423	Cells_EBV-transformed_lymphocytes	69.61	Cells_Transformed_fibroblasts	0.0253
rs9268645	6	32408526	HLA-DQB1-AS1	6	32627657	32628506	Adipose_Visceral_Omentum	0.000137483	0.0355577	-0.218497	KBM7	NA	TRUE	219131	0.7162	Spleen	6.093	Brain_Cerebellar_Hemisphere	0
rs9268645	6	32408526	HLA-DQB1-AS1	6	32627657	32628506	Muscle_Skeletal	3.39841e-05	0.0110535	-0.240862	KBM7	NA	TRUE	219131	0.1897	Spleen	6.093	Brain_Cerebellar_Hemisphere	0
rs9268645	6	32408526	HLA-DQB2	6	32723875	32731311	Adipose_Subcutaneous	2.95557e-07	0.000165602	0.357266	IMR90	NA	TRUE	315349	0.584	Skin_Not_Sun_Exposed_Suprapubic	16.19	Cells_Transformed_fibroblasts	0
rs9268645	6	32408526	HLA-DQB2	6	32723875	32731311	Artery_Aorta	5.42257e-05	0.0165416	0.286305	IMR90	NA	TRUE	315349	0.3246	Skin_Not_Sun_Exposed_Suprapubic	16.19	Cells_Transformed_fibroblasts	0
rs9268645	6	32408526	HLA-DQB2	6	32723875	32731311	Artery_Coronary	2.27286e-05	0.00777155	0.42987	IMR90	NA	TRUE	315349	0.3153	Skin_Not_Sun_Exposed_Suprapubic	16.19	Cells_Transformed_fibroblasts	0
rs9268645	6	32408526	HLA-DQB2	6	32723875	32731311	Artery_Tibial	9.39965e-11	1.00099e-07	0.367916	IMR90	NA	TRUE	315349	0.1789	Skin_Not_Sun_Exposed_Suprapubic	16.19	Cells_Transformed_fibroblasts	0
rs9268645	6	32408526	HLA-DQB2	6	32723875	32731311	Brain_Anterior_cingulate_cortex_BA24	2.8675e-05	0.00955161	0.550645	IMR90	NA	TRUE	315349	0.03176	Skin_Not_Sun_Exposed_Suprapubic	16.19	Cells_Transformed_fibroblasts	0
rs9268645	6	32408526	HLA-DQB2	6	32723875	32731311	Brain_Caudate_basal_ganglia	8.05991e-05	0.0231675	0.401256	IMR90	NA	TRUE	315349	0.03127	Skin_Not_Sun_Exposed_Suprapubic	16.19	Cells_Transformed_fibroblasts	0
rs9268645	6	32408526	HLA-DQB2	6	32723875	32731311	Brain_Cortex	1.37152e-06	0.000655275	0.564799	IMR90	NA	TRUE	315349	0.0439	Skin_Not_Sun_Exposed_Suprapubic	16.19	Cells_Transformed_fibroblasts	0
rs9268645	6	32408526	HLA-DQB2	6	32723875	32731311	Brain_Frontal_Cortex_BA9	1.13052e-06	0.00054979	0.673417	IMR90	NA	TRUE	315349	0.03034	Skin_Not_Sun_Exposed_Suprapubic	16.19	Cells_Transformed_fibroblasts	0
rs9268645	6	32408526	HLA-DQB2	6	32723875	32731311	Brain_Hippocampus	2.20363e-05	0.00754942	0.499687	IMR90	NA	TRUE	315349	0.03758	Skin_Not_Sun_Exposed_Suprapubic	16.19	Cells_Transformed_fibroblasts	0
rs9268645	6	32408526	HLA-DQB2	6	32723875	32731311	Brain_Spinal_cord_cervical_c-1	8.5975e-05	0.0243408	0.606683	IMR90	NA	TRUE	315349	0.2766	Skin_Not_Sun_Exposed_Suprapubic	16.19	Cells_Transformed_fibroblasts	0
rs9268645	6	32408526	HLA-DQB2	6	32723875	32731311	Breast_Mammary_Tissue	4.73853e-06	0.00197329	0.408195	IMR90	NA	TRUE	315349	0.595	Skin_Not_Sun_Exposed_Suprapubic	16.19	Cells_Transformed_fibroblasts	0
rs9268645	6	32408526	HLA-DQB2	6	32723875	32731311	Cells_EBV-transformed_lymphocytes	7.17061e-11	7.72924e-08	0.773974	IMR90	NA	TRUE	315349	6.326	Skin_Not_Sun_Exposed_Suprapubic	16.19	Cells_Transformed_fibroblasts	0
rs9268645	6	32408526	HLA-DQB2	6	32723875	32731311	Colon_Sigmoid	5.35627e-06	0.0021717	0.448906	IMR90	NA	TRUE	315349	0.09636	Skin_Not_Sun_Exposed_Suprapubic	16.19	Cells_Transformed_fibroblasts	0
rs9268645	6	32408526	HLA-DQB2	6	32723875	32731311	Esophagus_Muscularis	2.11717e-05	0.00728853	0.320905	IMR90	NA	TRUE	315349	0.1449	Skin_Not_Sun_Exposed_Suprapubic	16.19	Cells_Transformed_fibroblasts	0
rs9268645	6	32408526	HLA-DQB2	6	32723875	32731311	Lung	8.14166e-10	7.59501e-07	0.394625	IMR90	NA	TRUE	315349	2.778	Skin_Not_Sun_Exposed_Suprapubic	16.19	Cells_Transformed_fibroblasts	0
rs9268645	6	32408526	HLA-DQB2	6	32723875	32731311	Muscle_Skeletal	1.10764e-06	0.000540895	0.290886	IMR90	NA	TRUE	315349	0.04229	Skin_Not_Sun_Exposed_Suprapubic	16.19	Cells_Transformed_fibroblasts	0
rs9268645	6	32408526	HLA-DQB2	6	32723875	32731311	Nerve_Tibial	1.59807e-13	2.489e-10	0.516166	IMR90	NA	TRUE	315349	0.6347	Skin_Not_Sun_Exposed_Suprapubic	16.19	Cells_Transformed_fibroblasts	0
rs9268645	6	32408526	HLA-DQB2	6	32723875	32731311	Pancreas	3.65974e-05	0.0117522	0.329676	IMR90	NA	TRUE	315349	0.04981	Skin_Not_Sun_Exposed_Suprapubic	16.19	Cells_Transformed_fibroblasts	0
rs9268645	6	32408526	HLA-DQB2	6	32723875	32731311	Pituitary	1.13839e-05	0.00427263	0.499998	IMR90	NA	TRUE	315349	0.3242	Skin_Not_Sun_Exposed_Suprapubic	16.19	Cells_Transformed_fibroblasts	0
rs9268645	6	32408526	HLA-DQB2	6	32723875	32731311	Small_Intestine_Terminal_Ileum	9.04696e-06	0.00346167	0.400903	IMR90	NA	TRUE	315349	0.8443	Skin_Not_Sun_Exposed_Suprapubic	16.19	Cells_Transformed_fibroblasts	0
rs9268645	6	32408526	HLA-DQB2	6	32723875	32731311	Spleen	0.000129138	0.0336952	0.398951	IMR90	NA	TRUE	315349	2.397	Skin_Not_Sun_Exposed_Suprapubic	16.19	Cells_Transformed_fibroblasts	0
rs9268645	6	32408526	HLA-DQB2	6	32723875	32731311	Stomach	1.06553e-08	8.11897e-06	0.413304	IMR90	NA	TRUE	315349	0.1274	Skin_Not_Sun_Exposed_Suprapubic	16.19	Cells_Transformed_fibroblasts	0
rs9268645	6	32408526	HLA-DQB2	6	32723875	32731311	Testis	2.35391e-06	0.00107108	0.432926	IMR90	NA	TRUE	315349	0.1889	Skin_Not_Sun_Exposed_Suprapubic	16.19	Cells_Transformed_fibroblasts	0
rs9268645	6	32408526	HLA-DQB2	6	32723875	32731311	Thyroid	1.2155e-07	7.42219e-05	0.319313	IMR90	NA	TRUE	315349	0.2876	Skin_Not_Sun_Exposed_Suprapubic	16.19	Cells_Transformed_fibroblasts	0
rs9268645	6	32408526	HLA-DQB2	6	32723875	32731311	Whole_Blood	2.32817e-14	4.13634e-11	0.445302	IMR90	NA	TRUE	315349	0.3577	Skin_Not_Sun_Exposed_Suprapubic	16.19	Cells_Transformed_fibroblasts	0
rs9268645	6	32408526	HLA-DRB1	6	32546546	32557625	Adipose_Subcutaneous	3.30533e-05	0.0107933	-0.172483	IMR90	NA	TRUE	138020	75.62	Cells_EBV-transformed_lymphocytes	281.1	Cells_Transformed_fibroblasts	0.1327
rs9268645	6	32408526	HLA-DRB1	6	32546546	32557625	Artery_Tibial	1.41808e-05	0.00511597	-0.13572	IMR90	NA	TRUE	138020	21.51	Cells_EBV-transformed_lymphocytes	281.1	Cells_Transformed_fibroblasts	0.1327
rs9268645	6	32408526	HLA-DRB1	6	32546546	32557625	Brain_Anterior_cingulate_cortex_BA24	1.23929e-05	0.00459762	-0.351887	IMR90	NA	TRUE	138020	5.057	Cells_EBV-transformed_lymphocytes	281.1	Cells_Transformed_fibroblasts	0.1327
rs9268645	6	32408526	HLA-DRB1	6	32546546	32557625	Brain_Caudate_basal_ganglia	1.86673e-05	0.00654749	-0.269175	IMR90	NA	TRUE	138020	7.121	Cells_EBV-transformed_lymphocytes	281.1	Cells_Transformed_fibroblasts	0.1327
rs9268645	6	32408526	HLA-DRB1	6	32546546	32557625	Brain_Cerebellum	9.79278e-07	0.000486274	-0.402527	IMR90	NA	TRUE	138020	2.039	Cells_EBV-transformed_lymphocytes	281.1	Cells_Transformed_fibroblasts	0.1327
rs9268645	6	32408526	HLA-DRB1	6	32546546	32557625	Brain_Cortex	4.04454e-08	2.69295e-05	-0.431547	IMR90	NA	TRUE	138020	4.437	Cells_EBV-transformed_lymphocytes	281.1	Cells_Transformed_fibroblasts	0.1327
rs9268645	6	32408526	HLA-DRB1	6	32546546	32557625	Brain_Frontal_Cortex_BA9	2.06582e-05	0.0071326	-0.345724	IMR90	NA	TRUE	138020	3.552	Cells_EBV-transformed_lymphocytes	281.1	Cells_Transformed_fibroblasts	0.1327
rs9268645	6	32408526	HLA-DRB1	6	32546546	32557625	Brain_Hippocampus	4.31027e-05	0.0135459	-0.265878	IMR90	NA	TRUE	138020	8.325	Cells_EBV-transformed_lymphocytes	281.1	Cells_Transformed_fibroblasts	0.1327
rs9268645	6	32408526	HLA-DRB1	6	32546546	32557625	Heart_Atrial_Appendage	6.3647e-06	0.00253979	-0.323621	IMR90	NA	TRUE	138020	16.35	Cells_EBV-transformed_lymphocytes	281.1	Cells_Transformed_fibroblasts	0.1327
rs9268645	6	32408526	HLA-DRB1	6	32546546	32557625	Lung	5.02524e-07	0.000267977	-0.198905	IMR90	NA	TRUE	138020	151.6	Cells_EBV-transformed_lymphocytes	281.1	Cells_Transformed_fibroblasts	0.1327
rs9268645	6	32408526	HLA-DRB1	6	32546546	32557625	Muscle_Skeletal	5.28668e-05	0.0161968	-0.152751	IMR90	NA	TRUE	138020	6.926	Cells_EBV-transformed_lymphocytes	281.1	Cells_Transformed_fibroblasts	0.1327
rs9268645	6	32408526	HLA-DRB1	6	32546546	32557625	Skin_Not_Sun_Exposed_Suprapubic	1.7861e-10	1.81983e-07	-0.293258	IMR90	NA	TRUE	138020	26.95	Cells_EBV-transformed_lymphocytes	281.1	Cells_Transformed_fibroblasts	0.1327
rs9268645	6	32408526	HLA-DRB1	6	32546546	32557625	Skin_Sun_Exposed_Lower_leg	2.3836e-11	2.80909e-08	-0.25339	IMR90	NA	TRUE	138020	30.88	Cells_EBV-transformed_lymphocytes	281.1	Cells_Transformed_fibroblasts	0.1327
rs9268645	6	32408526	HLA-DRB1	6	32546546	32557625	Testis	2.55438e-05	0.00860925	-0.294956	IMR90	NA	TRUE	138020	7.083	Cells_EBV-transformed_lymphocytes	281.1	Cells_Transformed_fibroblasts	0.1327
rs9268645	6	32408526	HLA-DRB1	6	32546546	32557625	Thyroid	0.000174029	0.0432387	-0.163707	IMR90	NA	TRUE	138020	34.14	Cells_EBV-transformed_lymphocytes	281.1	Cells_Transformed_fibroblasts	0.1327
rs9268645	6	32408526	HLA-DRB1	6	32546546	32557625	Whole_Blood	4.968e-07	0.000265887	-0.116879	IMR90	NA	TRUE	138020	52.88	Cells_EBV-transformed_lymphocytes	281.1	Cells_Transformed_fibroblasts	0.1327
rs9268645	6	32408526	NOTCH4	6	32162620	32191844	Cells_EBV-transformed_lymphocytes	1.83386e-06	0.000850218	0.526165	K562	NA	TRUE	216682	0.378	Adipose_Visceral_Omentum	27.93	Cells_Transformed_fibroblasts	0.1083
rs9388489	6	126698718	CENPW	6	126661320	126670021	Adipose_Subcutaneous	4.50968e-07	0.000243051	-0.245541	NHEK	NA	TRUE	28697	2.242	Testis	25.63	Heart_Left_Ventricle	0.2418
rs9388489	6	126698718	CENPW	6	126661320	126670021	Artery_Tibial	0.000181088	0.0446472	-0.179325	NHEK	NA	TRUE	28697	1.692	Testis	25.63	Heart_Left_Ventricle	0.2418
rs9388489	6	126698718	CENPW	6	126661320	126670021	Breast_Mammary_Tissue	0.000193991	0.0473988	-0.216157	NHEK	NA	TRUE	28697	3.278	Testis	25.63	Heart_Left_Ventricle	0.2418
rs9388489	6	126698718	CENPW	6	126661320	126670021	Heart_Atrial_Appendage	1.9307e-07	0.000113957	-0.427611	NHEK	NA	TRUE	28697	0.54	Testis	25.63	Heart_Left_Ventricle	0.2418
rs9388489	6	126698718	CENPW	6	126661320	126670021	Nerve_Tibial	7.50854e-05	0.0218731	-0.207541	NHEK	NA	TRUE	28697	1.181	Testis	25.63	Heart_Left_Ventricle	0.2418
rs9388489	6	126698718	CENPW	6	126661320	126670021	Spleen	3.11385e-07	0.000173645	-0.261973	NHEK	NA	TRUE	28697	3.294	Testis	25.63	Heart_Left_Ventricle	0.2418
rs9653442	2	100825366	AFF3	2	100162323	100759201	Artery_Aorta	4.11711e-10	3.95548e-07	0.360736	KBM7	NA	TRUE	66165	1.187	Brain_Cerebellar_Hemisphere	9.416	Cells_EBV-transformed_lymphocytes	0.03008
rs9653442	2	100825366	AFF3	2	100162323	100759201	Artery_Tibial	4.10918e-10	3.95548e-07	0.212394	KBM7	NA	TRUE	66165	2.152	Brain_Cerebellar_Hemisphere	9.416	Cells_EBV-transformed_lymphocytes	0.03008
rs9653442	2	100825366	AFF3	2	100162323	100759201	Brain_Anterior_cingulate_cortex_BA24	2.20371e-06	0.00100793	0.222467	KBM7	NA	TRUE	66165	3.21	Brain_Cerebellar_Hemisphere	9.416	Cells_EBV-transformed_lymphocytes	0.03008
rs9653442	2	100825366	AFF3	2	100162323	100759201	Brain_Cerebellar_Hemisphere	1.82479e-06	0.000847781	0.310523	KBM7	NA	TRUE	66165	9.416	Brain_Cerebellar_Hemisphere	9.416	Cells_EBV-transformed_lymphocytes	0.03008
rs9653442	2	100825366	AFF3	2	100162323	100759201	Brain_Cerebellum	1.12654e-07	6.93889e-05	0.306318	KBM7	NA	TRUE	66165	7.977	Brain_Cerebellar_Hemisphere	9.416	Cells_EBV-transformed_lymphocytes	0.03008
rs9653442	2	100825366	LONRF2	2	100889753	100939195	Thyroid	4.5279e-05	0.0141668	0.163171	IMR90	NA	TRUE	64387	3.697	Fallopian_Tube	43.81	Cells_Transformed_fibroblasts	0.01117
rs9850225	3	80865763	RP11-47P18.2	3	80814048	80838505	Testis	1.74582e-11	2.09233e-08	-0.392848	NHEK	NA	TRUE	27258	1.889	Testis	1.889	Adipose_Subcutaneous	0

## Sheet: Summary of T1D SNPs
A summary of the T1D associated genetic variants analysed by CoDeS3D algorithm
T1D SNPs_significant eQTLs	T1D SNPs_non-significant eQTLs
rs1004446	rs10758593
rs10137082	rs11154178
rs1015166	rs11258747
rs10186458	rs114846446
rs10509540	rs11723864
rs10517086	rs11725853
rs10786436	rs117372389
rs10822050	rs11755527
rs10988542	rs11839053
rs11052552	rs12251307
rs11145763	rs12437854
rs11171739	rs12444268
rs11203203	rs1250563
rs11580078	rs1265564
rs11698685	rs12722495
rs11741255	rs12863738
rs12232497	rs13045180
rs12598357	rs1445898
rs12679857	rs1465788
rs12708716	rs1534422
rs1270942	rs1989248
rs12928404	rs2066363
rs13217044	rs2069762
rs1326934	rs2075184
rs1332099	rs2524054
rs1689510	rs2647044
rs16956936	rs2738774
rs1701704	rs2807264
rs17166496	rs28485846
rs17388568	rs34884278
rs17466626	rs35612822
rs17696736	rs36051895
rs17885785	rs3757247
rs1893217	rs4871297
rs1980493	rs4900384
rs1983853	rs4948088
rs1990760	rs4972593
rs2153977	rs55705316
rs2165738	rs6027504
rs2251396	rs6027506
rs2269241	rs61277444
rs2281808	rs61839660
rs2290400	rs62131887
rs2292239	rs62324212
rs229541	rs6534347
rs2304256	rs6689858
rs2358994	rs6897932
rs2410601	rs7020673
rs2476601	rs7042370
rs2523989	rs706778
rs2542151	rs72809865
rs2664170	rs72831309
rs2836882	rs7528684
rs2857595	rs7533564
rs2872507	rs755374
rs2903692	rs7562121
rs2990510	rs7583877
rs3024505	rs7679475
rs3087243	rs7725052
rs317865	rs7831697
rs3184504	rs80028505
rs36001488	rs878889
rs3741208	rs9272346
rs3761980	rs941576
rs3764021	rs947474
rs3788013	rs950146
rs3825932	rs9810233
rs4084127
rs416603
rs4246905
rs425105
rs4505848
rs4625
rs4676410
rs4763879
rs478222
rs4788084
rs4869313
rs539514
rs550448
rs5753037
rs579459
rs602662
rs614226
rs6547853
rs657152
rs6679677
rs689
rs6931865
rs7100025
rs7111341
rs71597855
rs7171171
rs7202877
rs7221109
rs72743477
rs743777
rs7588550
rs763361
rs7660520
rs7672495
rs77150043
rs7731626
rs7804356
rs8035957
rs836589
rs886424
rs924043
rs9268645
rs9388489
rs9653442
rs9850225
rs9976767

## Sheet: Reactome Pathways analysis
A complete summary of Reactome pathway analysis of T1D-associated eGenes
Pathway identifier	Pathway name	#Entities found	#Entities total	Entities ratio	Entities pValue	Entities FDR	#Reactions found	#Reactions total	Reactions ratio	Species identifier	Species name	Submitted entities found	Mapped entities	Found reaction identifiers
R-HSA-202430	Translocation of ZAP-70 to Immunological synapse	18	42	0.00304171	1.11e-16	2.43e-14	4	4	0.000347	9606	Homo sapiens	HLA-DQA2;HLA-DQB2;HLA-DRB1;HLA-DQB1;HLA-DPA1		R-HSA-8855381;R-HSA-202168;R-HSA-202344;R-HSA-202174
R-HSA-202427	Phosphorylation of CD3 and TCR zeta chains	18	45	0.00325898	1.11e-16	2.43e-14	5	7	0.000608	9606	Homo sapiens	HLA-DQA2;HLA-DQB2;HLA-DRB1;HLA-DQB1;HLA-DPA1		R-HSA-202291;R-HSA-202214;R-HSA-202165;R-HSA-202233;R-HSA-8852200
R-HSA-202433	Generation of second messenger molecules	19	58	0.00420046	1.11e-16	2.43e-14	10	17	0.00147569	9606	Homo sapiens	HLA-DQA2;HLA-DQB2;HLA-DRB1;LAT;HLA-DQB1;HLA-DPA1		R-HSA-202241;R-HSA-202375;R-HSA-202245;R-HSA-202325;R-HSA-202212;R-HSA-202331;R-HSA-202248;R-HSA-202216;R-HSA-213407;R-HSA-213406
R-HSA-389948	PD-1 signaling	18	45	0.00325898	1.11e-16	2.43e-14	1	4	0.000347	9606	Homo sapiens	HLA-DQA2;HLA-DQB2;HLA-DRB1;HLA-DQB1;HLA-DPA1		R-HSA-389758
R-HSA-388841	Costimulation by the CD28 family	20	97	0.00702491	5.94e-14	1.04e-11	8	34	0.00295139	9606	Homo sapiens	CTLA4;HLA-DQA2;HLA-DQB2;HLA-DRB1;HLA-DQB1;HLA-DPA1;PDK1		R-HSA-2317314;R-HSA-388833;R-HSA-388829;R-HSA-389532;R-HSA-389758;R-HSA-388809;R-HSA-198270;R-HSA-2316429
R-HSA-2132295	MHC class II antigen presentation	23	147	0.010646	2.16e-13	3.16e-11	25	26	0.00225694	9606	Homo sapiens	HLA-DMA;HLA-DMB;CTSH;DYNLL1;HLA-DQA2;HLA-DOB;HLA-DQB2;HLA-DRB1;HLA-DQB1;HLA-DPA1		R-HSA-2130336;R-HSA-8951498;R-HSA-8951500;R-HSA-2130725;R-HSA-2130731;R-HSA-2130349;R-HSA-2130478;R-HSA-2213235;R-HSA-2213236;R-HSA-2213239;R-HSA-2130486;R-HSA-2213241;R-HSA-2213243;R-HSA-8856157;R-HSA-2130619;R-HSA-2213244;R-HSA-2213246;R-HSA-2213248;R-HSA-2130500;R-HSA-2130504;R-HSA-2130378;R-HSA-2130640;R-HSA-2130641;R-HSA-2130706;R-HSA-2130393
R-HSA-202424	Downstream TCR signaling	21	124	0.0089803	5.67e-13	7.08e-11	17	24	0.00208333	9606	Homo sapiens	PSMD3;PTEN;HLA-DQA2;HLA-DQB2;HLA-DRB1;HLA-DQB1;HLA-DPA1;PDK1		R-HSA-202307;R-HSA-202466;R-HSA-199456;R-HSA-202534;R-HSA-202437;R-HSA-202500;R-HSA-202443;R-HSA-202472;R-HSA-202222;R-HSA-202478;R-HSA-202510;R-HSA-202453;R-HSA-202164;R-HSA-202459;R-HSA-202394;R-HSA-5607724;R-HSA-202489
R-HSA-202403	TCR signaling	22	146	0.0105736	1.51e-12	1.65e-10	36	52	0.00451389	9606	Homo sapiens	PSMD3;PTEN;HLA-DQA2;HLA-DQB2;HLA-DRB1;LAT;HLA-DQB1;HLA-DPA1;PDK1		R-HSA-202307;R-HSA-202241;R-HSA-202375;R-HSA-202245;R-HSA-202437;R-HSA-202500;R-HSA-202443;R-HSA-202248;R-HSA-202510;R-HSA-8855381;R-HSA-202453;R-HSA-202325;R-HSA-202459;R-HSA-202331;R-HSA-202394;R-HSA-213407;R-HSA-213406;R-HSA-202466;R-HSA-199456;R-HSA-202214;R-HSA-202534;R-HSA-202212;R-HSA-202216;R-HSA-202344;R-HSA-202472;R-HSA-202222;R-HSA-202478;R-HSA-8852200;R-HSA-202291;R-HSA-202165;R-HSA-2…
R-HSA-877300	Interferon gamma signaling	27	250	0.0181054	8.52e-12	8.26e-10	2	15	0.00130208	9606	Homo sapiens	TRIM26;HLA-DQA2;HLA-DQB2;HLA-DRB1;HLA-DQB1;HLA-DPA1;HLA-E		R-HSA-1031716;R-HSA-1031713
R-HSA-913531	Interferon Signaling	29	388	0.0280997	6.41e-09	5.58e-07	17	51	0.00442708	9606	Homo sapiens	NUP93;TRIM26;TYK2;HLA-DQA2;HLA-DQB2;HLA-DRB1;HLA-DQB1;HLA-DPA1;HLA-E		R-HSA-912680;R-HSA-909732;R-HSA-1176059;R-HSA-1031716;R-HSA-909729;R-HSA-997314;R-HSA-1031713;R-HSA-909730;R-HSA-997311;R-HSA-909724;R-HSA-997309;R-HSA-909726;R-HSA-909722;R-HSA-1015702;R-HSA-909719;R-HSA-909718;R-HSA-1015699
R-HSA-1280218	Adaptive Immune System	47	1000	0.0724218	2.46e-07	1.94e-05	119	253	0.0219618	9606	Homo sapiens	KLRB1;PTEN;ICAM5;RASGRP1;HLA-DMA;HLA-DMB;PSMD3;CTSH;CTLA4;HLA-DQA2;HLA-DOB;MICA;PDK1;MICB;HLA-DPA1;ERAP2;UBE2E3;ERAP1;TAP2;LMO7;LNPEP;BTN3A2;DYNLL1;UBAC1;HLA-E;RNF123;CLEC2B;KLRF1;CD226;HLA-DQB2;HLA-DRB1;LAT;HLA-DQB1		R-HSA-202241;R-HSA-199169;R-HSA-2130725;R-HSA-202245;R-HSA-202500;R-HSA-202248;R-HSA-2130731;R-HSA-202510;R-HSA-2130478;R-HSA-1168640;R-HSA-2130486;R-HSA-2317314;R-HSA-199456;R-HSA-202534;R-HSA-198955;R-HSA-8863914;R-HSA-202291;R-HSA-5685606;R-HSA-2130706;R-HSA-5685608;R-HSA-202307;R-HSA-8951498;R-HSA-8951499;R-HSA-8951500;R-HSA-198983;R-HSA-2213235;R-HSA-2213236;R-HSA-2213239;R-HSA-202325;R-HSA-…
R-HSA-8847993	ERBB2 Activates PTK6 Signaling	4	18	0.00130359	0.000636	0.0425919	2	2	0.000174	9606	Homo sapiens	ERBB4;ERBB2		R-HSA-8848005;R-HSA-8847995
R-HSA-6785631	ERBB2 Regulates Cell Motility	4	19	0.00137601	0.000776	0.0481294	2	2	0.000174	9606	Homo sapiens	ERBB4;ERBB2		R-HSA-6785636;R-HSA-6785648
R-HSA-1963640	GRB2 events in ERBB2 signaling	4	20	0.00144844	0.000937	0.054375	4	4	0.000347	9606	Homo sapiens	ERBB4;ERBB2		R-HSA-1250498;R-HSA-1306969;R-HSA-1250488;R-HSA-1306972
R-HSA-8863795	Downregulation of ERBB2 signaling	5	36	0.00260718	0.00110932	0.0599035	8	14	0.00121528	9606	Homo sapiens	ERBB4;CDC37;ERBB2		R-HSA-1918092;R-HSA-1918095;R-HSA-1963563;R-HSA-1358798;R-HSA-8864125;R-HSA-8863804;R-HSA-1358792;R-HSA-8864105
R-HSA-1253288	Downregulation of ERBB4 signaling	3	10	0.000724	0.00133444	0.0680564	4	4	0.000347	9606	Homo sapiens	ERBB4		R-HSA-1253282;R-HSA-1253300;R-HSA-1973956;R-HSA-1977296
R-HSA-1280215	Cytokine Signaling in Immune system	36	1052	0.0761877	0.00310146	0.134965	124	614	0.0532986	9606	Homo sapiens	SMAD3;TNFSF15;TYK2;MAPK14;AGER;HLA-E;NUP93;PSMD3;SDC1;TRIM26;HLA-DQA2;HLA-DQB2;HLA-DRB1;HLA-DQB1;HLA-DPA1;SH2B1		R-HSA-5693012;R-HSA-1112602;R-HSA-8987266;R-HSA-1112604;R-HSA-8950405;R-HSA-198669;R-HSA-8987014;R-HSA-8987033;R-HSA-447252;R-HSA-982810;R-HSA-449811;R-HSA-9009554;R-HSA-450333;R-HSA-8950423;R-HSA-9009558;R-HSA-8950441;R-HSA-6786118;R-HSA-6784324;R-HSA-6783556;R-HSA-6784323;R-HSA-912680;R-HSA-6786114;R-HSA-8952749;R-HSA-6783552;R-HSA-8987040;R-HSA-1031716;R-HSA-8987042;R-HSA-1031713;R-HSA-8987070…
R-HSA-168256	Immune System	75	2626	0.19018	0.00310796	0.134965	307	1458	0.126562	9606	Homo sapiens	PTEN;ICAM5;APEH;PSMD3;CTSH;CTLA4;TRIM26;HLA-DOB;PGM1;PDK1;HLA-DPA1;UBE2E3;TAP2;LMO7;TYK2;BTN3A2;DYNLL1;HLA-E;NUP93;RNF123;ACLY;KLRF1;CD226;HLA-DQB2;HLA-DQB1;RAB5B;KLRB1;AGER;RASGRP1;C2;HLA-DMA;HLA-DMB;ORMDL3;HLA-DQA2;MICA;SH2B1;MICB;SMAD3;GSDMA;ERAP2;JUP;TNFSF15;ERAP1;LNPEP;MAPK14;UBAC1;CLEC2B;SDC1;F13B;HLA-DRB1;LAT		R-HSA-202241;R-HSA-199169;R-HSA-5693012;R-HSA-202245;R-HSA-1112602;R-HSA-202248;R-HSA-8987266;R-HSA-1112604;R-HSA-8950405;R-HSA-2130478;R-HSA-198669;R-HSA-981535;R-HSA-2130486;R-HSA-8950423;R-HSA-8950441;R-HSA-6786118;R-HSA-2317314;R-HSA-6783556;R-HSA-6786114;R-HSA-6783552;R-HSA-1031716;R-HSA-8863914;R-HSA-1031713;R-HSA-202291;R-HSA-8950448;R-HSA-202307;R-HSA-8951498;R-HSA-8951499;R-HSA-6783524;R…
R-HSA-8848021	Signaling by PTK6	6	67	0.00485226	0.00329182	0.134965	7	52	0.00451389	9606	Homo sapiens	ERBB4;LRRK2;ERBB2;TMEM170A;BCAR1		R-HSA-8848726;R-HSA-8848005;R-HSA-8857583;R-HSA-8857565;R-HSA-8847995;R-HSA-8857577;R-HSA-8848713
R-HSA-9006927	Signaling by Non-Receptor Tyrosine Kinases	6	67	0.00485226	0.00329182	0.134965	7	52	0.00451389	9606	Homo sapiens	ERBB4;LRRK2;ERBB2;TMEM170A;BCAR1		R-HSA-8848726;R-HSA-8848005;R-HSA-8857583;R-HSA-8857565;R-HSA-8847995;R-HSA-8857577;R-HSA-8848713
R-HSA-1250196	SHC1 events in ERBB2 signaling	4	35	0.00253476	0.00687762	0.268227	4	6	0.000521	9606	Homo sapiens	ERBB4;ERBB2		R-HSA-1250195;R-HSA-1250486;R-HSA-1963578;R-HSA-1250463
R-HSA-1250347	SHC1 events in ERBB4 signaling	3	20	0.00144844	0.00914657	0.347569	4	4	0.000347	9606	Homo sapiens	ERBB4		R-HSA-1250357;R-HSA-1250383;R-HSA-1250380;R-HSA-1250348
R-HSA-174577	Activation of C3 and C5	2	7	0.000507	0.00990534	0.356592	3	3	0.00026	9606	Homo sapiens	C2		R-HSA-173680;R-HSA-166817;R-HSA-173636
R-HSA-1963642	PI3K events in ERBB2 signaling	3	22	0.00159328	0.0118058	0.413204	7	7	0.000608	9606	Homo sapiens	ERBB4;ERBB2		R-HSA-1306963;R-HSA-1306979;R-HSA-1306965;R-HSA-1250346;R-HSA-1250462;R-HSA-1250189;R-HSA-1306957
R-HSA-1227986	Signaling by ERBB2	5	67	0.00485226	0.0146742	0.484249	34	43	0.00373264	9606	Homo sapiens	ERBB4;CDC37;ERBB2		R-HSA-1250195;R-HSA-1306963;R-HSA-1251922;R-HSA-8848005;R-HSA-6785636;R-HSA-1306965;R-HSA-1306969;R-HSA-1250463;R-HSA-1250462;R-HSA-1306972;R-HSA-1250498;R-HSA-1918092;R-HSA-1918095;R-HSA-6785648;R-HSA-1963589;R-HSA-1358798;R-HSA-1306953;R-HSA-1358792;R-HSA-1250189;R-HSA-1306957;R-HSA-1963586;R-HSA-1963581;R-HSA-1963582;R-HSA-1250486;R-HSA-1963578;R-HSA-1250488;R-HSA-8864105;R-HSA-1306979;R-HSA-1…
R-HSA-1912422	Pre-NOTCH Expression and Processing	5	80	0.00579374	0.0286737	0.580345	17	33	0.00286458	9606	Homo sapiens	NOTCH4;ATP2A1;RBPJ		R-HSA-1912349;R-HSA-9017835;R-HSA-1912415;R-HSA-1912382;R-HSA-1912379;R-HSA-1912378;R-HSA-1912410;R-HSA-1912372;R-HSA-1912374;R-HSA-1912369;R-HSA-1912401;R-HSA-1912368;R-HSA-1912364;R-HSA-1912353;R-HSA-1912352;R-HSA-1912416;R-HSA-1912355
R-HSA-428359	Insulin-like Growth Factor-2 mRNA Binding Proteins (IGF2BPs/IMPs/VICKZs) bind RNA	2	13	0.000941	0.031456	0.580345	3	3	0.00026	9606	Homo sapiens	IGF2		R-HSA-428293;R-HSA-428287;R-HSA-428296
R-HSA-350054	Notch-HLH transcription pathway	2	13	0.000941	0.031456	0.580345	1	1	8.68e-05	9606	Homo sapiens	NOTCH4;RBPJ		R-HSA-212356
R-HSA-1912408	Pre-NOTCH Transcription and Translation	4	56	0.00405562	0.0321057	0.580345	7	23	0.00199653	9606	Homo sapiens	NOTCH4;RBPJ		R-HSA-1912364;R-HSA-9017835;R-HSA-1912415;R-HSA-1912410;R-HSA-1912401;R-HSA-1912416;R-HSA-1912368
R-HSA-376172	DSCAM interactions	2	15	0.00108633	0.0407505	0.580345	6	6	0.000521	9606	Homo sapiens	DSCAM;MAPK14		R-HSA-451366;R-HSA-451347;R-HSA-451345;R-HSA-376126;R-HSA-376123;R-HSA-376122
R-HSA-1250342	PI3K events in ERBB4 signaling	2	15	0.00108633	0.0407505	0.580345	3	3	0.00026	9606	Homo sapiens	ERBB4		R-HSA-1250370;R-HSA-1250353;R-HSA-1250372
R-HSA-418359	Reduction of cytosolic Ca++ levels	2	15	0.00108633	0.0407505	0.580345	2	3	0.00026	9606	Homo sapiens	ATP2A1;SLC8A1		R-HSA-425661;R-HSA-418365
R-HSA-5609974	Defective PGM1 causes PGM1-CDG (CDG1t)	1	2	0.000145	0.0414153	0.580345	1	1	8.68e-05	9606	Homo sapiens	PGM1		R-HSA-5609939
R-HSA-70370	Galactose catabolism	2	16	0.00115875	0.0457376	0.580345	1	4	0.000347	9606	Homo sapiens	PGM1		R-HSA-70427
R-HSA-9006921	Integrin signaling	3	39	0.00282445	0.0507974	0.580345	5	24	0.00208333	9606	Homo sapiens	RASGRP1;TMEM170A;BCAR1;PDK1		R-HSA-372693;R-HSA-372705;R-HSA-432110;R-HSA-354173;R-HSA-372697
R-HSA-354192	Integrin alphaIIb beta3 signaling	3	39	0.00282445	0.0507974	0.580345	5	24	0.00208333	9606	Homo sapiens	RASGRP1;TMEM170A;BCAR1;PDK1		R-HSA-372693;R-HSA-372705;R-HSA-432110;R-HSA-354173;R-HSA-372697
R-HSA-8877330	RUNX1 and FOXP3 control the development of regulatory T lymphocytes (Tregs)	2	17	0.00123117	0.050936	0.580345	3	20	0.00173611	9606	Homo sapiens	CTLA4		R-HSA-8877414;R-HSA-8877421;R-HSA-8877404
R-HSA-399956	CRMPs in Sema3A signaling	2	18	0.00130359	0.0563348	0.580345	5	5	0.000434	9606	Homo sapiens	PLXNA2;PLXNA3		R-HSA-399951;R-HSA-399946;R-HSA-399947;R-HSA-399931;R-HSA-399944
R-HSA-2559585	Oncogene Induced Senescence	3	42	0.00304171	0.0606498	0.580345	6	18	0.0015625	9606	Homo sapiens	ETS2		R-HSA-8979082;R-HSA-3209177;R-HSA-3209098;R-HSA-3209179;R-HSA-3209165;R-HSA-3132737
R-HSA-5619053	Defective SLC22A5 causes systemic primary carnitine deficiency (CDSP)	1	3	0.000217	0.0614774	0.580345	1	1	8.68e-05	9606	Homo sapiens	SLC22A5		R-HSA-5625674
R-HSA-5083633	Defective POMT1 causes MDDGA1, MDDGB1 and MDDGC1	1	3	0.000217	0.0614774	0.580345	1	1	8.68e-05	9606	Homo sapiens	DAG1		R-HSA-5615604
R-HSA-5674404	PTEN Loss of Function in Cancer	1	3	0.000217	0.0614774	0.580345	1	1	8.68e-05	9606	Homo sapiens	PTEN		R-HSA-2317387
R-HSA-3304347	Loss of Function of SMAD4 in Cancer	1	3	0.000217	0.0614774	0.580345	1	1	8.68e-05	9606	Homo sapiens	SMAD3		R-HSA-3311014
R-HSA-5083628	Defective POMGNT1 causes MDDGA3, MDDGB3 and MDDGC3	1	3	0.000217	0.0614774	0.580345	1	1	8.68e-05	9606	Homo sapiens	DAG1		R-HSA-5617096
R-HSA-3311021	SMAD4 MH2 Domain Mutants in Cancer	1	3	0.000217	0.0614774	0.580345	1	1	8.68e-05	9606	Homo sapiens	SMAD3		R-HSA-3311014
R-HSA-5083629	Defective POMT2 causes MDDGA2, MDDGB2 and MDDGC2	1	3	0.000217	0.0614774	0.580345	1	1	8.68e-05	9606	Homo sapiens	DAG1		R-HSA-5615556
R-HSA-111446	Activation of BIM and translocation to mitochondria	1	3	0.000217	0.0614774	0.580345	1	2	0.000174	9606	Homo sapiens	DYNLL1		R-HSA-139918
R-HSA-399955	SEMA3A-Plexin repulsion signaling by inhibiting Integrin adhesion	2	19	0.00137601	0.0619233	0.580345	6	8	0.000694	9606	Homo sapiens	PLXNA2;PLXNA3		R-HSA-399942;R-HSA-399941;R-HSA-399934;R-HSA-399935;R-HSA-399933;R-HSA-399928
[truncated: 734 more rows]

## Sheet: GO Ontology_biological process
Gene Ontologies (Biological process) of T1D-associated eGenes
[truncated: 70 more rows]

## Sheet: GO Ontology_molecular function
Gene Ontologies (Molecular function) of T1D-associated eGenes
[truncated: 4 more rows]

[truncated: 2 more sheets: GO Ontology_cellular component, DeepSEA functional prediction]
